# Supplementary material for: A GC–MS-based untargeted metabolomics approach for comprehensive metabolic profiling of mycophenolate mofetil-induced toxicity in mice
Source: Front Mol Biosci. 2024 Mar 7;11:1332090. doi: 10.3389/fmolb.2024.1332090 (PMC10955473; doi:10.3389/fmolb.2024.1332090)
Supplement: Supplementary file 2 [file Table1.XLSX]

## Sheet: Description
Description
Supplementary table 1	Intestine
Supplementary table 2	Hippocampus
Supplementary table 3	Lung
Supplementary table 4	Liver
Supplementary table 5	Kidney
Supplementary table 6	Heart
Supplementary table 7	Serum
Supplementary table 8	Cortex

## Sheet: Supplementary table 1
Retention Time (RT)	Metabolites	% similarity	Molecular Formula	CAS Number	Peak Area	Molecular Weight (MW)
5.08041	Hexane, 3,3,4,4-tetrafluoro-	52.287	C6H10F4	648-36-2	62220.8	158.072
5.12761	Tridecane, 6-methyl-	69.2756	C14H30	13287-21-3	263578	198.235
5.22076	Hexane, 3,3,4,4-tetrafluoro-	50.9486	C6H10F4	648-36-2	354128	158.072
5.28611	Phosphoramidous difluoride	51.7895	F2H2NP	25757-74-8	134836	84.989
5.29513	Octadecane, 3-ethyl-5-(2-ethylbutyl)-	57.1483	C26H54	55282-12-7	271471	366.423
5.37438	Silanol, trimethyl-, carbonate (2:1)	83.8373	C7H18O3Si2	39981-89-0	995738	206.079
5.51021	Methanesulfonic anhydride	50.5677	C2H6O5S2	7143-01-03	34695.5	173.966
5.62078	Propylene glycol, 2TMS derivative	69.4238	C9H24O2Si2	17887-27-3	87269.2	220.131
5.65216	1,2-Benzenediol, 3-fluoro-, diacetate	52.694	C10H9FO4	55030-67-6	994.63	212.048
5.7264	Decane	70.1828	C10H22	124-18-5	203325	142.172
5.94506	Heptane, 4-ethyl-	80.3512	C9H20	2216-32-2	496313	128.157
6.02605	N,N-Dimethylacetamide	73.0253	C4H9NO	127-19-5	174670	87.068
6.03635	Hexane, 3-ethyl-3-methyl-	65.1427	C9H20	3074-76-8	112647	128.157
6.04667	Methane-d, trichloro-	63.7918	CDCl3	865-49-6	130632	118.921
6.08257	1-Pentanol, 2-amino-4-methyl-, (.+/-.)-	52.3042	C6H15NO	16369-17-8	29989.2	117.115
6.08761	Cyclopropanecarbonitrile, 2-[p-(dimethylamino)phenyl]-1-phenyl-	55.1037	C18H18N2	6114-58-5	31074.4	262.147
6.10384	Decane, 4-methyl-	73.8597	C11H24	2847-72-5	923909	156.188
6.15325	Methanesulfonyl chloride	50.8086	CH3ClO2S	124-63-0	22422.5	113.954
6.24113	Methyltris(trimethylsiloxy)silane	87.5867	C10H30O3Si4	17928-28-8	730551	310.127
6.28482	4-Pyridinol, TMS derivative	66.6153	C8H13NOSi	1000352-50-3	171852	167.077
6.3823	2-(4-Methoxy-phenyl)-7-phenyl-2,5-dihydro-pyrazolo[3,4-d]pyridazin-4-one	54.9618	C18H14N4O2	1000318-49-8	43683.6	318.112
6.50404	4-N-Trimethylsilylmethylaminobutyric acid, trimethylsilyl ester	50.0836	C11H27NO2Si2	1000079-09-1	71720.7	261.158
6.66841	D-(-)-Lactic acid, 2TMS derivative	90.3851	C9H22O3Si2	1000333-99-1	9.87518e+06	234.111
6.68491	Nonane, 4,5-dimethyl-	86.1497	C11H24	17302-23-7	1.73677e+06	156.188
6.71754	N-(2-Cyanoethyl)-N-(2-hydroxypropyl)nitramine nitrate(ester)	52.6524	C6H10N4O5	110538-95-9	4721.64	218.065
6.78567	Dodecane, 4,6-dimethyl-	83.3896	C14H30	61141-72-8	766134	198.235
6.97559	Diglycolic acid, 2TMS derivative	50.9416	C10H22O5Si2	55557-25-0	11692.3	278.101
7.06761	Cyclohexanecarboxylic acid, 2-ethylhexyl ester	60.9327	C15H28O2	16397-74-3	123703	240.209
7.29066	Carbamic acid, phenyl-, phenyl ester	51.6455	C13H11NO2	4930-03-04	1020.49	213.079
7.45643	L-Alanine, 2TMS derivative	85.1132	C9H23NO2Si2	27844-07-1	1.11755e+06	233.127
7.49687	Nonane, 4,5-dimethyl-	83.5405	C11H24	17302-23-7	305981	156.188
7.60079	3-Ethyl-3-methylheptane	74.9214	C10H22	17302-01-1	190217	142.172
7.72271	(2S,3R)-3-[(4E,7E)-Nona-4,7-dienoyl]-N,N-bis(trimethylsilyl)oxirane-2-carboxamide	59.6381	C18H33NO3Si2	1000395-61-1	4.88141e+06	367.2
7.72469	Thiazolidine-4-carboxylic acid, 2-t-butyl-, methyl ester	53.5417	C9H17NO2S	1000164-10-5	692503	203.098
7.87652	Indapamide	50.0166	C16H16ClN3O3S	26807-65-8	51146.3	365.06
7.93674	3-Aminopropanol, 2TBDMS derivative	65.5822	C15H37NOSi2	1000333-00-9	205809	303.241
7.94433	Benzene, 1,3-diethyl-5-methyl-	52.2298	C11H16	2050-24-0	88927.7	148.125
8.12215	4-Cyanobenzoic acid, 5-fluoro-2-nitrophenyl ester	53.2439	C14H7FN2O4	1000292-66-1	15266.2	286.039
8.14153	Disiloxane, ethylpentamethyl-	63.8503	C7H20OSi2	6231-60-3	8.21737e+06	176.105
8.19117	Pyridine, 3,4-diphenyl-	50.3773	C17H13N	5216-04-06	33345.1	231.105
8.37799	2-((2-Chloroethyl)ethylamino)ethanol, TMS derivative	55.1912	C9H22ClNOSi	1000226-84-1	11426	223.116
8.53577	Silane, cyclohexyldimethoxymethyl-	89.6139	C9H20O2Si	17865-32-6	889053	188.123
8.61492	Pentasiloxane, dodecamethyl-	78.0873	C12H36O4Si5	141-63-9	54163.8	384.146
8.64254	Urea, methyl-	50.1576	C2H6N2O	598-50-5	13765.4	74.048
8.6614	Nonane, 5-(2-methylpropyl)-	69.1433	C13H28	62185-53-9	111582	184.219
8.7952	Bisphenol C	75.692	C17H20O2	79-97-0	249601	256.146
8.84264	Undecane, 2,6-dimethyl-	52.8808	C13H28	17301-23-4	99662.8	184.219
9.00455	3-Chloro-1,2-propanediol, 2TMS derivative	52.4522	C9H23ClO2Si2	73639-52-8	84830.9	254.093
9.06095	Cyclopropanamine, N-methyl-1-phenyl-	52.7999	C10H13N	56771-48-3	21073.9	147.105
9.15803	3H-pyrazolo[3,4-d]pyrimidin-3-one, 2,3a-dihydro-4,6-dimethyl-2-phenyl-	66.4198	C13H12N4O	1000396-50-0	1594.63	240.101
9.23323	Decane, 1,1-diethoxy-	51.7158	C14H30O2	34764-02-8	83151.5	230.225
9.31446	Dodecane	86.6765	C12H26	112-40-3	1.04087e+06	170.203
9.42948	1,2-Benzenedicarbonitrile	52.8668	C8H4N2	91-15-6	122068	128.037
9.48853	L-Valine, 2TMS derivative	79.8215	C11H27NO2Si2	7364-44-5	106487	261.158
9.5342	Undecane, 2,6-dimethyl-	76.6625	C13H28	17301-23-4	253734	184.219
9.68737	Undecane, 4,8-dimethyl-	70.9306	C13H28	17301-33-6	186039	184.219
10.0245	Hexane, 3,3-dimethyl-	70.4078	C8H18	563-16-6	57198.7	114.141
10.0732	Di-trimethylsilyl peroxide	69.5524	C6H18O2Si2	5796-98-5	170821	178.085
10.1232	Hexadecane	59.6131	C16H34	544-76-3	26117.6	226.266
10.2054	6-Methyladenine, TMS derivative	53.3218	C9H15N5Si	32865-83-1	265782	221.11
10.2383	Dodecane, 4,6-dimethyl-	69.0861	C14H30	61141-72-8	146884	198.235
10.3787	Ethanolamine, 3TMS derivative	85.3363	C11H31NOSi3	5630-81-9	1.39993e+06	277.171
10.3918	Conanine, (5.alpha.)-	67.3498	C22H37N	468-33-7	158983	315.293
10.404	2,4-Dimethyldodecane	67.6428	C14H30	6117-99-3	299654	198.235
10.4536	Silanol, trimethyl-, phosphate (3:1)	78.8799	C9H27O4PSi3	10497-05-9	5.28623e+06	314.095
10.4611	[1,1'-Biphenyl]-3,3'-dicarboxaldehyde, 6,6'-dihydroxy-5,5'-dimethoxy-	54.5506	C16H14O6	2092-49-1	6933.41	302.079
10.4644	Benzamide, N-(1-naphthyl)-2,3,4-trifluoro-	55.0266	C17H10F3NO	1000307-18-2	86976	301.071
10.4762	l-Norvaline, n-propoxycarbonyl-, heptadecyl ester	61.9489	C26H51NO4	1000320-74-2	636072	441.382
10.4958	1H-Benzimidazole, 1-(2-phenylethenyl)-, (E)-	56.8617	C15H12N2	51644-24-7	246671	220.1
10.5014	4-Benzoimidazol-1-ylbutyric acid	53.0693	C11H12N2O2	1000311-62-4	316531	204.09
10.5057	Glycerol, 3TMS derivative	88.8487	C12H32O3Si3	6787-10-06	5.10667e+06	308.166
10.5066	L-(+)-Threose, tris(trimethylsilyl) ether (isomer 1)	52.4297	C13H32O4Si3	1000380-15-6	2.36583e+06	336.161
10.5308	Thiazole, 5-phenyl-	65.9147	C9H7NS	1826-13-7	188917	161.03
10.6109	4-[4-(Chloromethyl)-1,3-thiazol-2-yl]phenol	54.2023	C10H8ClNOS	287197-73-3	260104	225.002
10.6155	Nonane, 4,5-dimethyl-	74.7296	C11H24	17302-23-7	1.04238e+06	156.188
10.6714	Iron, bis-(2-methylindenyl)-	55.5033	C20H18Fe	1000154-69-9	93072.3	314.076
10.6878	Silane, dimethylhexyloxydecyloxy-	70.9754	C18H40O2Si	1000346-90-9	61412.6	316.28
10.7299	1-Ethyl-4-methoxy-9H-pyrido[3,4-b]indole	55.3593	C14H14N2O	26585-14-8	876.425	226.111
10.7721	6-Methyl-2,5-diphenyl-6,7-dihydropyrazolo[1,5-c]pyrimidin-7-one	67.0759	C19H15N3O	110950-94-2	18415.8	301.122
10.8419	L-Isoleucine, 2TMS derivative	61.0655	C12H29NO2Si2	7483-92-3	432216	275.174
10.8998	benzonitrile, 4-[[2-amino-5-(dimethylamino)phenyl]sulfonyl]-	54.7742	C15H15N3O2S	1000397-53-4	58362.9	301.088
10.9157	1-Hexanamine, 2-ethyl-N-(2-ethylhexyl)-	64.6197	C16H35N	106-20-7	187450	241.277
10.9501	Isonicotinic Acid, TBDMS derivative	68.7861	C12H19NO2Si	1000364-43-6	71516	237.119
10.9645	Sulazepam	58.6604	C16H13ClN2S	2898-13-7	99945.3	300.049
11.0067	(3-Methoxy-phenyl)-(6-methyl-4-phenyl-quinazolin-2-yl)-amine	50.6924	C22H19N3O	1000317-62-7	65269.3	341.153
11.0529	Terephthalic acid, isobutyl 2-(4-nitrophenoxy)ethyl ester	59.7023	C20H21NO7	1000416-09-0	170231	387.132
11.0563	Glycine, 3TMS derivative	88.2345	C11H29NO2Si3	5630-82-0	2.71473e+06	291.151
11.0599	[1,1'-Biphenyl]-4-ol, 4'-bromo-	54.3458	C12H9BrO	29558-77-8	305748	247.984
11.1999	2-(p-Phenoxyphenyl)indolizine	62.8138	C20H15NO	72006-54-3	133494	285.115
11.2014	2,5-Furandicarboxylic acid, 2TMS derivative	59.0351	C12H20O5Si2	55494-09-2	143694	300.085
11.2832	Ethyl 2,5-dimethyl-9-oxo-1H,6H,9H-pyrrolo[2,3-f]quinoline-7-carboxylate	50.4254	C16H16N2O3	1000387-21-9	5423.48	284.116
11.3445	Trisiloxane, octamethyl-	75.0509	C8H24O2Si3	107-51-7	1.00843e+06	236.108
11.3541	Bis(tert-butyldimethylsilyl)amine	51.1932	C12H31NSi2	1000366-61-6	31015.8	245.2
11.4177	Sulfurous acid, 2-ethylhexyl isohexyl ester	70.4919	C14H30O3S	1000309-19-0	1142.22	278.192
11.4486	N-Tolyl-fluorenone nitrone	50.2623	C20H15NO	66783-82-2	1356.69	285.115
11.6039	Uracil, 2TMS derivative	75.7787	C10H20N2O2Si2	10457-14-4	243472	256.106
11.6063	1-Ethyl-1-decyloxy-1-silacyclohexane	51.2978	C17H36OSi	1000279-38-0	78555	284.254
11.8491	2-(1-Methyl-2-oxo-1,2-dihydroindol-3-ylidene)-6,7-dihydro-5H-thiazolo[3,2-a]pyrimidin-3-one	57.388	C15H13N3O2S	1000269-99-4	48656.6	299.073
11.8632	1-Amino-6,7,8,9-tetrahydro-5-methyl-N-(4-methyl-2-thiazolyl)thieno[2,3-c]isoquinoline-2-carboxamide	57.8545	C17H18N4OS2	339156-35-3	532.34	358.092
11.9098	Butylphosphonic acid, 4-(2-phenylprop-2-yl)phenyl propyl ester	66.223	C22H31O3P	1000323-09-1	83292.3	374.201
11.9658	1,8-naphthyridine, 2-phenyl-	58.9236	C14H10N2	1000400-51-1	53466.1	206.084
11.9769	Serine, 3TMS derivative	73.1232	C12H31NO3Si3	64625-17-8	331232	321.161
12.0373	Silane, diethyl(2-methoxyethoxy)pentadecyloxy-	54.5352	C22H48O3Si	1000363-54-4	57722.8	388.337
12.0949	Ethanone, 1-[4-(1-hydroxy-1-methylethyl)phenyl]-	62.2752	C11H14O2	54549-72-3	340671	178.099
12.2281	3,5-Pyridinedicarboxylic acid, 1,4-dihydro-4-(4-methoxyphenyl)-1,2,6-trimethyl-, diethyl ester	50.559	C21H27NO5	42972-34-9	3786.96	373.189
12.2612	Pentadecane, 5-methyl-	54.0264	C16H34	25117-33-3	149544	226.266
12.3788	2-Fluorobenzylamine, diundecyl	75.057	C29H52FN	1000310-31-9	31077.8	433.408
12.386	L-Threonine, 3TMS derivative	79.2102	C13H33NO3Si3	7537-02-02	232891	335.177
12.7209	N-(10-Methyl-10H-acridin-9-ylidene)-N'-phenyl-hydrazine	53.9603	C20H17N3	1000286-25-6	13836.6	299.142
12.7488	Undecane, 2,6-dimethyl-	65.6736	C13H28	17301-23-4	348289	184.219
12.7722	3-cyclopenten-1-one, 3,4-diphenyl-	50.5746	C17H14O	1000401-06-6	79315.7	234.104
12.8268	Benzaldehyde, 2-methyl-, (2,4-dinitrophenyl)hydrazone	50.0724	C14H12N4O4	1773-44-0	86545.5	300.086
12.9082	Heptadecane, 2-methyl-	53.5867	C18H38	1560-89-0	222262	254.297
12.9791	Pentadecane, 2,6,10,14-tetramethyl-	61.4277	C19H40	1921-70-6	261148	268.313
13.6211	9-Hydroxy-2,2-dimethyl-dec-5-en-3-one	53.6734	C12H22O2	1000193-59-8	85770.6	198.162
13.6948	4-Iodobutanal	56.5881	C4H7IO	1000411-49-8	73695.3	197.954
13.731	5-Benzofuranpropanol, 2-(1,3-benzodioxol-5-yl)-7-methoxy-	55.3486	C19H18O5	530-22-3	49206.9	326.115
13.7457	Aminomalonic acid, tris(trimethylsilyl)-	70.1472	C12H29NO4Si3	1000079-52-5	154909	335.14
13.926	Silane, diethylheptadecyloxy(2-phenylethoxy)-	66.919	C29H54O2Si	1000363-17-2	87953.3	462.389
13.9699	Silane, diethylheptadecyloxy(2-phenylethoxy)-	54.7268	C29H54O2Si	1000363-17-2	23580.8	462.389
14.0343	Malic acid, 3TMS derivative	70.8899	C13H30O5Si3	38166-11-9	38628.1	350.14
14.0491	2,3:8,9-Bis(methylendioxy)-5,5a,6,7-tetrahydro-6-methylbenz[e]indeno[2,1-b]azepine	52.3072	C20H17NO4	88151-43-3	13666.5	335.116
14.0703	Heptadecane	61.3573	C17H36	629-78-7	143063	240.282
14.1293	Heneicosane	80.4838	C21H44	629-94-7	260718	296.344
14.1363	Thiazole, 4,5-dimethyl-2-(2-methylpropyl)-	55.5653	C9H15NS	53498-32-1	1110.08	169.093
14.1802	6,6,8,8-Tetramethyl-2,5,7,9,12-pentaoxa-6,8-disilatridecane	54.8356	C10H26O5Si2	18001-62-2	23700.8	282.132
14.2416	2-Butyl-1,2-oxaborolane	50.5325	C7H15BO	5357-13-1	65991.2	126.122
14.2625	3,7-dioxa-2,8-disilanonane, 2,2,8,8-tetramethyl-5,5-bis[[(trimethylsilyl)oxy]methyl]-	72.6903	C17H44O4Si4	1000402-79-1	328992	424.232
14.4069	1-Methyl-2-pyrrolidineethanol	50.0274	C7H15NO	67004-64-2	126762	129.115
14.4273	Dibenz[b,d]cycloheptanol, 2,3,9-trimethoxy-	51.4923	C18H20O4	145068-62-8	56858.9	300.136
14.539	Aspartic acid, N-trimethylsilyl-, bis(trimethylsilyl) ester	61.5276	C13H31NO4Si3	1000386-64-0	273186	349.156
14.5594	L-5-Oxoproline, , 2TMS derivative	78.0675	C11H23NO3Si2	30274-77-2	154880	273.122
14.573	Carbonic acid, monoamide, N-tetradecyl-, hexyl ester	51.1129	C21H43NO2	1000406-59-0	80816.1	341.329
14.617	Hexanamide, N-(2-chloro-2-propenyl)-N-phenyl-	62.2398	C15H20ClNO	7595-69-9	22788.3	265.123
14.6898	4-Aminobutanoic acid, 3TMS derivative	74.9055	C13H33NO2Si3	39508-23-1	157652	319.182
14.7424	l-Isoleucyl-l-isoleucyl-l-isoleucine, N,N',N''-trimethyl-N-methoxycarbonyl-, methyl ester	64.3995	C24H45N3O6	1000322-60-7	32847.8	471.331
14.7625	l-Norvaline, N-(2-methoxyethoxycarbonyl)-, undecyl ester	56.9748	C20H39NO5	1000328-64-3	219214	373.283
14.815	Conanine, (5.alpha.)-	54.4772	C22H37N	468-33-7	16778.9	315.293
14.8313	Succinic acid, hept-2-yl 2,2,3,4,4,4-hexafluorobutyl ester	60.1482	C15H22F6O4	1000390-80-3	24659.5	380.142
14.8465	2,4,6-Tri-t-butylbenzenethiol	77.1736	C18H30S	961-39-7	4.68975e+06	278.207
14.8849	benzoic acid, 4-[2-(2-benzoxazolyl)ethenyl]-	52.0027	C16H11NO3	1000401-63-2	20219.6	265.074
14.8947	3,4-Dimethoxycinnamic acid, TMS derivative	53.1433	C14H20O4Si	27750-71-6	799.284	280.113
15.0228	Naphthalene, 3-(1,1-dimethylethyl)-1,2-dihydro-	50.5603	C14H18	55682-81-0	158046	186.141
15.0267	Creatinine - 3TMS Derivative	80.6485	C13H31N3OSi3	1000333-94-7	1.82826e+06	329.177
15.0308	Silane, diethyl(2-ethylbutoxy)undecyloxy-	67.5764	C21H46O2Si	1000363-43-0	458263	358.327
15.0346	2,2'-Biphenyldiol, 2TMS derivative	58.4952	C18H26O2Si2	1094-10-6	19509.7	330.147
15.0588	1,4-Diphenylpyrazole	51.4762	C15H12N2	15132-01-1	53052.7	220.1
15.1084	L-Threonic acid, tris(trimethylsilyl) ether, trimethylsilyl ester	66.5497	C16H40O5Si4	1000352-53-3	37519.7	424.195
15.1824	1,2-Bis(p-nitrophenyl)acetylene	52.116	C14H8N2O4	2735-14-0	141251	268.048
15.3035	Succinic acid, 3,5-dinitrobenzyl isobutyl ester	51.2528	C15H18N2O8	1000381-09-2	1195.2	354.106
15.4637	1-Naphthaleneacetic acid, 2,2,3,3-tetrafluoropropyl ester	57.9908	C15H12F4O2	1000415-04-1	72853.9	300.077
15.4798	Acetamide, 2-[[4-methyl-5-(4-morpholinylmethyl)-4H-1,2,4-triazol-3-yl]thio]-	52.2834	C10H17N5O2S	1000316-38-6	66602.6	271.11
15.5464	6H-Benzofuro[3,2-c][1]benzopyran-6a(11aH)-ol, 3,9-dimethoxy-, (6aR-cis)-	52.6162	C17H16O5	3187-52-8	798.657	300.1
15.7945	2-Phenazinol, 6-amino-	55.3688	C12H9N3O	18450-04-9	85062.9	211.075
15.8431	Hexadecane	68.3561	C16H34	544-76-3	145180	226.266
15.9654	2-(3'-Hydroxyphenylamino)-5-methyl-4-oxo-3,4-dihydropyrimidine	54.1529	C11H11N3O2	57465-60-8	10139.6	217.085
16.0272	L-Glutamic acid, 3TMS derivative	76.5056	C14H33NO4Si3	15985-07-6	368432	363.172
16.0661	1H-Isoindole-1,3(2H)-dione, 2-[1,1'-biphenyl]-4-yl-	54.8131	C20H13NO2	1592-49-0	37311.5	299.095
16.1455	5-Aminovaleric acid, 3TMS derivative	75.7393	C14H35NO2Si3	55191-54-3	445047	333.198
16.1676	Cyclooctasiloxane, hexadecamethyl-	60.7804	C16H48O8Si8	556-68-3	73379.4	592.15
16.2509	4-Estren-4,17.beta.-diol-3-one, tri-trimethylsilyl	59.4061	C27H50O3Si3	1000412-28-4	27705.1	506.307
16.4912	Fructose benzoyl oxime, pentakis(trimethylsilyl)-	52.3102	C28H59NO6Si5	1000071-96-2	44987.6	645.319
16.5844	D-(-)-Tagatose, pentakis(trimethylsilyl) ether, ethyloxime (isomer 1)	62.4068	C23H57NO6Si5	1000394-64-4	97993.6	583.303
16.7192	Boric acid, triphenyl ester	56.3157	C18H15BO3	1095-03-0	49767.8	290.111
16.7593	Nitrogen trifluoride	52.4342	F3N	7783-54-2	895.468	70.998
16.8028	D-Arabinose, tetrakis(trimethylsilyl) ether, ethyloxime (isomer 2)	79.9855	C19H47NO5Si4	1000394-64-9	203849	481.253
16.809	Fructose oxime, hexakis(trimehylsilyl)	53.9626	C24H61NO6Si6	120788-24-1	237032	627.311
16.8228	2H-1-Benzopyran-2-one, 5,6,7,8-tetrafluoro-	52.2039	C9H2F4O2	33739-04-7	53818.3	217.999
17.1438	Oxo-(6-phenyl-imidazo[1,2-a]pyridin-2-yl)-acetic acid, ethyl ester	50.7493	C17H14N2O3	1000318-40-7	77768.2	294.1
17.1714	Tetradecane, 5-methyl-	59.5878	C15H32	25117-32-2	49303.1	212.25
17.1829	Octadecane, 2,6,10,14-tetramethyl-	52.5153	C22H46	54964-82-8	25455.9	310.36
17.2384	Ethanone, 1-[5-(1,1-dimethylethyl)-2-ethyl-4-methyl-1,3,2-dioxaborolan-4-yl]-	52.9082	C11H21BO3	74646-07-4	211778	212.158
17.2513	Heneicosane	74.641	C21H44	629-94-7	146522	296.344
17.2657	1-Pentanol, 4-(dibenzylamino)-5-phenyl-3-(p-tosylamino)-	51.0464	C32H36N2O3S	1000161-38-0	859.647	528.245
17.4778	Phosphoric acid, 2-(trimethylsiloxy)-1-[(trimethylsiloxy)methyl]ethyl bis(trimethylsilyl) ester	66.3411	C15H41O6PSi4	31038-12-7	132145	460.172
17.8348	Eicosane	65.0952	C20H42	112-95-8	146585	282.329
17.9776	Phosphoric acid, bis(trimethylsilyl) 2,3-bis[(trimethylsilyl)oxy]propyl ester	79.5401	C15H41O6PSi4	31038-11-6	253131	460.172
18.0208	{4-Methoxy-2-[(trimethylsilyl)oxy]phenyl}(4-methylphenyl)methanone	53.5117	C18H22O3Si	1000408-24-6	58111.9	314.134
18.2754	Cyclononasiloxane, octadecamethyl-	66.8225	C18H54O9Si9	556-71-8	170058	666.169
18.288	Vitamin E	51.4535	C29H50O2	1959-02-09	30899.9	430.381
18.6146	Dodecane, 1-iodo-	60.9063	C12H25I	4292-19-7	57006.3	296.1
18.8547	D-Pinitol, pentakis(trimethylsilyl) ether	69.7038	C22H54O6Si5	1000380-13-4	175815	554.277
19.103	(Bis-butoxycarbonylmethyl-amino)-acetic acid, butyl ester	55.7815	C18H33NO6	1000318-44-9	468191	359.231
19.157	Heptasiloxane, hexadecamethyl-	53.0374	C16H48O6Si7	541-01-5	123183	532.184
19.1947	3-Pentanol, trihexylsilyl ether	59.1058	C23H50OSi	1000325-63-1	99896.9	370.363
19.1995	Myristic acid, TMS derivative	79.1898	C17H36O2Si	18603-17-3	262626	300.248
19.2921	Benzonitrile, 4-(6-methoxy-2-quinolyl)	50.9023	C17H12N2O	1000197-91-5	131834	260.095
19.2921	D-Pinitol, pentakis(trimethylsilyl) ether	70.2007	C22H54O6Si5	1000380-13-4	200507	554.277
19.3922	L-(-)-Sorbose, pentakis(trimethylsilyl) ether, pentafluorobenzyloxime (isomer 1)	56.2886	C28H54F5NO6Si5	1000394-61-0	177703	735.272
19.5149	D-Fructose, 1,3,4,5,6-pentakis-O-(trimethylsilyl)-, O-methyloxime	51.3782	C22H55NO6Si5	56196-14-6	107642	569.288
19.5757	D-Allose, pentakis(trimethylsilyl) ether, methyloxime (syn)	69.2541	C22H55NO6Si5	1000380-19-7	83578	569.288
19.6262	D-Allose, pentakis(trimethylsilyl) ether, methyloxime (syn)	66.8069	C22H55NO6Si5	1000380-19-7	60362.6	569.288
19.6558	5-(1-Cyclohexenyl)-5-ethyl-2,4-imidazolidinedione	60.1987	C11H16N2O2	75356-49-9	161956	208.121
19.7084	d-Glucose, 2,3,4,5,6-pentakis-O-(trimethylsilyl)-, o-methyloxyme, (1Z)-	84.9232	C22H55NO6Si5	128705-73-7	678191	569.288
19.95	D-(+)-Talose, pentakis(trimethylsilyl) ether, methyloxime (anti)	80.567	C22H55NO6Si5	1000380-18-8	181251	569.288
19.9502	D-(+)-Talose, pentakis(trimethylsilyl) ether, methyloxime (syn)	56.4306	C22H55NO6Si5	1000380-18-7	133536	569.288
20.0139	Silane, trichlorooctadecyl-	65.3043	C18H37Cl3Si	112-04-9	494610	386.173
20.1539	Cyclodecasiloxane, eicosamethyl-	71.3986	C20H60O10Si10	18772-36-6	182282	740.188
20.2018	Glucose oxime, 6TMS derivative	52.519	C24H61NO6Si6	120850-89-7	22696.4	627.311
20.241	Silane, dimethyl(1-phenylpropoxy)tridecyloxy-	59.4242	C24H44O2Si	1000347-28-2	50195.1	392.311
20.2734	Benzenepropanoic acid, 3,5-bis(1,1-dimethylethyl)-4-hydroxy-, methyl ester	57.4492	C18H28O3	6386-38-5	17384	292.204
20.4376	Scyllo-Inositol, 6TMS derivative	51.6674	C24H60O6Si6	14251-18-4	76710.2	612.301
20.545	Dodecane, 1-iodo-	60.2254	C12H25I	4292-19-7	190862	296.1
20.6028	Propanethioic acid, 2-methyl-, S-ethyl ester	55.7133	C6H12OS	2432-50-0	52579	132.061
20.6104	1-Hexadecanol, TBDMS derivative	54.1749	C22H48OSi	76358-80-0	204421	356.347
20.8051	Silane, diethyl(2-ethoxyethyloxy)octadecyloxy-	62.6878	C26H56O3Si	1000363-52-8	1137.88	444.4
20.8728	Terephthalic acid, monoamide, N-(2-methoxyphenyl)-, propyl ester	51.3505	C18H19NO4	1000324-01-2	12711.8	313.131
20.9921	Heptasiloxane, hexadecamethyl-	58.7568	C16H48O6Si7	541-01-5	114521	532.184
21.134	Isobutyl octadecyl ether	50.8181	C22H46O	1000406-32-9	42357.9	326.355
21.3193	Scyllo-Inositol, 6TMS derivative	54.1823	C24H60O6Si6	14251-18-4	129517	612.301
21.379	9-Hexadecenoic acid, (Z)-, TMS derivative	70.8593	C19H38O2Si	1000333-19-8	245771	326.264
21.3965	3,5-Diiodosalicylaldehyde	54.7509	C7H4I2O2	2631-77-8	37230.5	373.83
21.621	1-(4-Hydroxy-3-methoxy-benzylidene)-6-methyl-1H,5H-furo[3,4-c]pyridine-3,4-dione	56.1647	C16H13NO5	339157-57-2	141219	299.079
21.6266	Androst-2-en-17-amine, 4,4-dimethyl-N-(2-phenylethyl)-, (5.alpha.)-	58.889	C29H43N	53286-45-6	495031	405.34
21.6381	Palmitic Acid, TMS derivative	86.2531	C19H40O2Si	55520-89-3	4.04332e+07	328.28
21.7023	Pregna-9(11)-en-18-ol-3,20-dione, acetate	59.028	C23H32O4	1000191-09-2	379423	372.23
21.7407	9-[2-Ethoxycarbonyl)ethyl]-1,2,3,4-tetrahydro-2,2,4,4-tetramethyl-9H-pyrido[3,4-b]undole	68.7064	C20H28N2O2	1000326-80-1	147509	328.215
21.845	Succinic acid, 2-(2-chlorophenoxy)ethyl dodecyl ester	56.7151	C24H37ClO5	1000381-54-3	125614	440.233
21.8598	Cyclodecasiloxane, eicosamethyl-	72.2682	C20H60O10Si10	18772-36-6	325128	740.188
21.9215	N-Acetyl-D-glucosamine, tetrakis(trimethylsilyl) ether, methyloxime (syn)	54.1818	C21H50N2O6Si4	1000380-19-3	127153	538.275
22.0604	Myo-Inositol, 6TMS derivative	86.2517	C24H60O6Si6	2582-79-8	3.88257e+06	612.301
22.2384	N,N-Dimethyl-4-(3-oxo-3-thiophen-2-yl-propylamino)-benzamide	52.8964	C16H18N2O2S	1000275-81-9	165974	302.109
22.5334	Squalane	54.442	C30H62	111-01-3	71757.7	422.485
22.5924	Sedoheptulose, o-methyloxime, hexakis-O-(trimethylsilyl)-	63.8666	C26H65NO7Si6	1000298-66-2	43799.4	671.338
22.6781	Heptasiloxane, hexadecamethyl-	64.0388	C16H48O6Si7	541-01-5	43669.2	532.184
22.7551	Estradiol dipropionate	54.8366	C24H32O4	113-38-2	25570.5	384.23
22.7766	Heptadecanoic acid, TMS derivative	80.0912	C20H42O2Si	55517-58-3	1.07306e+07	342.295
22.7922	Dibenzothiophene, octafluoro-	61.0008	C12F8S	7136-57-4	56500.6	327.959
22.9111	1,2-Dibenzofurandicarboxylic acid, 3,9b-dihydro-7,9-dimethoxy-4,9b-dimethyl-, dimethyl ester	57.3324	C20H22O7	40801-29-4	5139.85	374.137
23.3387	4a.alpha.,4b.beta.-Gibbane-1,1,10.beta.-tricarboxylic acid, 4a,7-dihydroxy-8-methylene-, 1.alpha.,4a-lactone, dimethyl ester	52.2914	C21H26O7	18450-95-8	34318.2	390.168
23.4189	Cyclononasiloxane, octadecamethyl-	75.5346	C18H54O9Si9	556-71-8	409917	666.169
23.4425	6-(1H-Indol-3-yl)-5-methylcarbonyl-7,8,9,10-tetrahydro-5(6H)-phenanthridine	56.3113	C23H22N2O	1000326-86-7	49752.8	342.173
23.4588	Succinic acid, 2,2,3,3,4,4,5,5-octafluoropentyl 2-hexyl ester	52.7219	C15H20F8O4	1000390-67-8	58098.6	416.123
23.5116	9,12-Octadecadienoic acid (Z,Z)-, TMS derivative	71.3456	C21H40O2Si	56259-07-5	1.14509e+06	352.28
23.5785	Petroselinic acid, TMS derivative	83.1116	C21H42O2Si	96851-53-5	2.31772e+06	354.295
23.6335	Coumachlor ME	50.0509	C20H17ClO4	1000373-93-2	3477.16	356.082
23.6531	Oleic Acid, (Z)-, TMS derivative	82.7584	C21H42O2Si	21556-26-3	196600	354.295
23.8476	2-(4-Acetamidophenylamino)-3-chloro-1,4-naphthoquinone	51.1383	C18H13ClN2O3	351062-65-2	144557	340.061
23.8564	4H-1-Benzopyran-4-one, 3-(3,4-dimethoxyphenyl)-6,7-dimethoxy-	60.2561	C19H18O6	24126-93-0	17339.1	342.11
23.8732	Stearic acid, TMS derivative	85.8474	C21H44O2Si	18748-91-9	1.40367e+07	356.311
23.8849	Silane, dimethyl(pentafluorobenzyloxy)hexyloxy-	54.8441	C15H21F5O2Si	1000347-26-3	3.80104e+06	356.123
23.8979	Phenol, 2,4,6-tricyclohexyl-	66.0546	C24H36O	2130-62-3	265686	340.277
23.9355	3-Tripropylsilyloxypentadecane	56.5095	C24H52OSi	1000280-55-1	73657.9	384.379
23.961	N-Methyllaurotetanine	62.6065	C20H23NO4	2169-44-0	94790	341.163
24.0268	6(2H)-Benzofuranone, 2-(1,3-benzodioxol-5-yl)-3,5-dihydro-5-methoxy-3-methyl-5-(2-propenyl)-, [2S-(2.alpha.,3.beta.,5.alpha.)]-	59.8823	C20H20O5	57430-03-2	69870.3	340.131
24.1161	1,4-Di-(6-methylbenzoxazol-2-yl)benzene	59.703	C22H16N2O2	1000311-95-5	73621.1	340.121
24.1596	(3-Methoxy-phenyl)-(6-methyl-4-phenyl-quinazolin-2-yl)-amine	54.5263	C22H19N3O	1000317-62-7	16282	341.153
24.2391	Heptasiloxane, hexadecamethyl-	62.7924	C16H48O6Si7	541-01-5	538977	532.184
24.2499	Benzenamine, N-(2,6-diphenyl-4H-pyran-4-ylidene)-4-nitro-	54.115	C23H16N2O3	1000404-28-6	140330	368.116
24.2775	pyrazino[2,3-b:5,6-b']diquinoxaline	54.3387	C16H8N6	1000400-04-5	65491.8	284.081
24.2838	Benzene, 1,3-diiodo-	58.8662	C6H4I2	626-00-6	73573.3	329.84
24.2932	Bromophos	51.9378	C8H8BrCl2O3PS	2104-96-3	21687.1	363.849
24.5518	1-Hexadecanol, TBDMS derivative	59.5109	C22H48OSi	76358-80-0	34607.9	356.347
24.5735	Silane, diethylheptadecyloxy(2-methoxyethoxy)-	57.3283	C24H52O3Si	1000363-54-6	45637.6	416.369
24.5768	d-Glucose, 2,3,4,5-tetrakis-O-(trimethylsilyl)-, o-methyloxime, 6-[bis(trimethylsilyl) phosphate]	56.9182	C25H64NO9PSi6	55530-73-9	142701	721.293
24.8472	Cyclodecasiloxane, eicosamethyl-	79.0313	C20H60O10Si10	18772-36-6	302104	740.188
24.8571	Cholest-2-eno[2,3-b]indole, 1'-methyl-5'-methoxy-	56.3688	C35H53NO	1000210-58-3	107353	503.413
24.9362	Acetamide, N-[4-(trimethylsilyl)phenyl]-	52.9494	C11H17NOSi	17983-71-0	985.419	207.108
25.1767	Arachidonic acid, TMS derivative	88.4289	C23H40O2Si	113516-18-0	2.64404e+06	376.28
25.2479	1H-Cyclopropa[3,4]benz[1,2-e]azulene-5,7b,9,9a-tetrol, 3-[(acetyloxy)methyl]-1a,1b,4,4a,5,7a,8,9-octahydro-1,1,6,8-tetramethyl-, 9,9a-diacetate, [1aR-(1a.alpha.,1b.beta.,4a.alpha.,5.beta.,7a.alpha.,7b.alpha.,8.alpha.,9.beta.,9a.alpha.)]-	51.5994	C26H36O8	77550-15-3	130224	476.241
25.4353	1-Phenanthrenecarboxylic acid, tetradecahydro-7-(2-methoxy-2-oxoethylidene)-1,4a,8-trimethyl-9-oxo-, methyl ester, [1S-(1.alpha.,4a.alpha.,4b.beta.,8.beta.,8a.alpha.,10a.beta.)]-	56.6317	C22H32O5	57289-51-7	79978.2	376.225
25.4353	Silane, diethyldecyloxyoctyloxy-	63.5299	C22H48O2Si	1000363-08-0	28650.6	372.342
25.4353	1-Monomyristin, 2TMS derivative	54.5409	C23H50O4Si2	1188-73-4	32650.9	446.325
25.5394	Silane, diethyldodecyloxyhexyloxy-	59.2823	C22H48O2Si	1000363-74-0	24140.3	372.342
25.5518	D-Myo-Inositol, 1,2,4,5,6-pentakis-O-(trimethylsilyl)-, bis(trimethylsilyl) phosphate	72.5601	C27H69O9PSi7	55568-91-7	430805	764.306
25.5643	Phenol, 2-(5-chloro-2H-benzotriazol-2-yl)-4,6-bis(1,1-dimethylethyl)-	50.7363	C20H24ClN3O	3864-99-1	672870	357.161
25.6897	4-Hydroxybenzyl alcohol, 2TBDMS derivative	59.3735	C19H36O2Si2	1000364-43-9	559390	352.225
26.203	Tetracosamethyl-cyclododecasiloxane	62.5821	C24H72O12Si12	18919-94-3	579519	888.226
26.2396	7-Hydroxy-3-methyl-14H-5-thia-14-aza-pentaphene-8,13-dione	59.4672	C21H13NO3S	313225-03-5	40701.6	359.062
26.414	6-Bromo-3-(4-iodo-phenyl)-chromen-2-one	59.7561	C15H8BrIO2	25304-54-5	28364.5	425.875
26.4292	Rhein, 3TMS derivative	64.3447	C24H32O6Si3	7336-81-4	122168	500.151
26.4403	benzene, 1,1'-methylenebis[3-(1,1-dimethylethyl)-5-methyl-4-[(trimethylsilyl)oxy]-	65.2889	C29H48O2Si2	1000399-56-2	1.82183e+06	484.319
26.4638	Terephthaloyl chloride, tetrabromo-	50.2207	C8Br4Cl2O2	54120-56-8	17040	513.601
26.5025	9-(2-p-Tolylethyl)-3,4,5,6,7,9-hexahydro-2H-xanthene-1,8-dione	61.7853	C22H24O3	299945-39-4	568113	336.173
26.5196	Silane, dimethyl(docosyloxy)undecyloxy-	56.9687	C35H74O2Si	1000347-86-9	15289.4	554.546
26.6327	Dinaphtho[2,1-b:1',2'-d]thiophene	51.5731	C20H12S	194-65-0	2906.94	284.066
26.7347	Cyclopropa[3',4']benz[1',2':4,5]azuleno[1,8a-d]-1,3-dioxole-5b,7,7a-triol, 3a,5a,6,7,8,8a,8b,11-octahydro-10-(hydroxymethyl)-2,2,4,6,8,8-hexamethyl-, 7,7a-diacetate, [3aS-(3a.alpha.,5a.alpha.,5b.alpha.,6.alpha.,7.beta.,7a.alpha.,8a.alpha.,8b.beta.,11aS*)]-	51.5472	C27H38O8	77573-38-7	149704	490.257
26.8833	1-Hexadecanol, TBDMS derivative	54.5988	C22H48OSi	76358-80-0	35436.3	356.347
27.0248	2-Palmitoylglycerol, 2TMS derivative	74.1201	C25H54O4Si2	53212-97-8	440962	474.356
27.025	2-Hydroxy-2-phenylethylamine di(trifluoroacetyl)-	53.627	C12H9F6NO3	13230-75-6	145439	329.049
27.0404	Heptasiloxane, hexadecamethyl-	53.8185	C16H48O6Si7	541-01-5	468638	532.184
27.0465	Doconexent, TMS derivative	57.8598	C25H40O2Si	1000333-23-8	358405	400.28
27.1588	7,10,13,16-Docosatetraenoic acid, (Z)-, TMS derivative	60.1059	C25H44O2Si	1000333-55-0	100773	404.311
27.2436	Astaxanthin	52.7541	C40H52O4	472-61-7	155647	596.387
27.2516	Silane, dimethyl(2-naphthoxy)ethoxy-	61.0397	C14H18O2Si	1000347-20-8	14161.6	246.108
27.3154	3,5-Diiodosalicylaldehyde	50.5014	C7H4I2O2	2631-77-8	87576.7	373.83
27.326	L-Valine, N-(2,5-ditrifluoromethylbenzoyl)-, heptadecyl ester	51.2407	C31H47F6NO3	1000346-58-1	211407	595.346
27.3367	1-Monopalmitin, 2TMS derivative	83.3193	C25H54O4Si2	1188-74-5	1.16991e+07	474.356
27.3488	1,3,4-Oxadiazole, 2,5-bis(p-nitrophenyl)-	50.8138	C14H8N4O5	1044-49-1	17218.8	312.049
27.3564	benzenepropanoic acid, 4-[(4-formylphenyl)phenylamino]-, ethyl ester	50.9407	C24H23NO3	1000398-64-6	109075	373.168
27.4575	Silane, [(6a,7,8,10a-tetrahydro-6,6,9-trimethyl-3-pentyl-6H-dibenzo[b,d]pyran-1,8-diyl)bis(oxy)]bis[dimethyl-, [6aR-(6a.alpha.,8.beta.,10a.beta.)]-	53.5803	C25H42O3Si2	77590-63-7	105294	446.267
27.4652	2,3-quinoxalinediamine, 6-nitro-N2,N3-diphenyl-	53.1471	C20H15N5O2	1000402-55-9	36223.8	357.123
27.4829	Cyclononasiloxane, octadecamethyl-	74.8422	C18H54O9Si9	556-71-8	200226	666.169
27.7282	Silane, diethylpentadecyloxytridecyloxy-	58.8365	C32H68O2Si	1000363-96-8	162618	512.499
27.782	3-penten-2-one, 5,5,5-trifluoro-4-hydroxy-, chromium(3+) salt, (3:1)	50.8933	C15H12CrF9O6	1000403-12-5	24381.9	510.99
28.3055	2-Phenyl-2H-phenanthro(9,10-d)triazole	53.7193	C20H13N3	973-14-8	108140	295.111
28.4017	Pregn-16-ene-11,14,18,20-tetrol, 3,9-epoxy-3-methoxy-, 11,20-diacetate, (3.alpha.,5.beta.,11.alpha.,14.beta.,20R)-	50.0858	C26H38O8	38774-56-0	50250.6	478.257
28.4539	Pregn-16-ene-11,14,18,20-tetrol, 3,9-epoxy-3-methoxy-, 11,20-diacetate, (3.alpha.,5.beta.,11.alpha.,14.beta.,20R)-	57.5867	C26H38O8	38774-56-0	81508.4	478.257
28.5921	Benzo-12-crown-4, 4'-(1,4,6,7-tetrahydro-1-methyl-5,8-dioxoimidazo[4,5-e][1,4]diazepin-7-yl)-	57.561	C19H22N4O6	220876-86-8	256253	402.154
28.6623	4H-1-Benzopyran-4-one, 3,5,7,8-tetrahydroxy-6-(3-methyl-2-butenyl)-2-phenyl-	52.3816	C20H18O6	40451-44-3	1086.79	354.11
28.6803	Cyclodecasiloxane, eicosamethyl-	74.1101	C20H60O10Si10	18772-36-6	574633	740.188
28.7819	Stearic acid, TMS derivative	55.2543	C21H44O2Si	18748-91-9	95313.4	356.311
28.7904	2-Thiopheneacetic acid, 2-naphthyl ester	54.184	C16H12O2S	1000308-06-0	88508	268.056
28.801	2-Monostearin, 2TMS derivative	73.3882	C27H58O4Si2	53336-13-3	531869	502.387
28.8017	2-Methyl-7,7,8,8-tetracyano-p-quinodimethane	56.7536	C13H6N4	1518-13-4	332334	218.059
28.9442	Benzo(c)carbazole	53.9791	C16H11N	34777-33-8	215411	217.089
28.9562	Benzo[qr]naphtho[2,1,8,7-fghi]pentacene	52.5584	C30H16	190-87-4	53230.3	376.125
28.9809	5,5'-Dithiobis-(2-nitrobenzoic acid)	58.8906	C14H8N2O8S2	69-78-3	162887	395.972
29.0811	methanone, bis(phenylsulfonyl)-, 2-phenylhydrazone	73.1149	C28H20N2O	1000398-95-0	49905.5	400.158
29.1084	Glycerol monostearate, 2TMS derivative	85.3878	C27H58O4Si2	1188-75-6	3.4733e+06	502.387
29.1467	methanone, bis(phenylsulfonyl)-, 2-phenylhydrazone	60.1953	C28H20N2O	1000398-95-0	51687	400.158
29.206	Silane, dimethylhexyloxyheptadecyloxy-	56.7507	C25H54O2Si	1000346-91-6	189232	414.389
29.4352	1H-Cyclopropa[3,4]benz[1,2-e]azulene-5,7b,9,9a-tetrol, 1a,1b,4,4a,5,7a,8,9-octahydro-3-(hydroxymethyl)-1,1,6,8-tetramethyl-, 5,9,9a-triacetate, [1aR-(1a.alpha.,1b.beta.,4a.beta.,5.beta.,7a.alpha.,7b.alpha.,8.alpha.,9.beta.,9a.alpha.)]-	57.4643	C26H36O8	77508-64-6	445266	476.241
29.4935	Heptasiloxane, hexadecamethyl-	55.6102	C16H48O6Si7	541-01-5	342178	532.184
29.5781	.beta.-D-Lactose, (isomer 1), 8TMS derivative	59.331	C36H86O11Si8	1000380-08-7	559968	918.432
29.8015	Cyclodecasiloxane, eicosamethyl-	74.5545	C20H60O10Si10	18772-36-6	1.25925e+06	740.188
29.8953	Hydrocortisone 21-acetate, bis(O-methyloxime)	51.6872	C25H38N2O6	1000394-54-6	228628	462.273
30.1853	4H-1-benzothiopyran, 4-[2-(2,6-diphenyl-4H-pyran-4-ylidene)ethylidene]-2-phenyl-	50.7144	C34H24OS	1000399-54-0	20754.3	480.155
30.6144	Heptasiloxane, hexadecamethyl-	54.8617	C16H48O6Si7	541-01-5	292140	532.184
30.7777	Silane, diethylisohexyloxyoctadecyloxy-	59.0889	C28H60O2Si	1000363-32-5	37154.2	456.436
30.7815	tetramethyl 2,2',2'',2'''-(cyclohexane-1,2-diyldinitrilo)tetraacetate	53.9862	C24H22N2O4	1000398-96-3	117002	402.158
30.8582	Cyclodecasiloxane, eicosamethyl-	71.9385	C20H60O10Si10	18772-36-6	1.21419e+06	740.188
30.9779	7aH-Cyclopenta[a]cyclopropa[f]cycloundecene-2,4,7,7a,10,11-hexol, 1,1a,2,3,4,4a,5,6,7,10,11,11a-dodecahydro-1,1,3,6,9-pentamethyl-, 2,4,7,10,11-pentaacetate	53.8548	C30H44O11	51906-08-2	318431	580.288
31.0508	Hexadecanoic acid, 1a,2,5,5a,6,9,10,10a-octahydro-5a-hydroxy-4-(hydroxymethyl)-1,1,7,9-tetramethyl-6,11-dioxo-1H-2,8a-methanocyclopenta[a]cyclopropa[e]cyclodecen-5-yl ester, [1aR-(1a.alpha.,2.alpha.,5.beta.,5a.beta.,8a.alpha.,9.alpha.,10a.alpha.)]-	51.1903	C36H56O6	77508-69-1	248408	584.408
31.2139	3,4-Dihydroxy-1-O-tolyl-pyrrolidine-2,5-dione	52.2141	C11H11NO4	297763-90-7	129477	221.069
31.2141	Astaxanthin	51.5943	C40H52O4	472-61-7	366284	596.387
31.2915	Methyl 2,3-dihydroxybenzoate, 2TMS derivative	53.6333	C14H24O4Si2	27798-54-5	73703.4	312.121
31.728	Heptasiloxane, hexadecamethyl-	52.3645	C16H48O6Si7	541-01-5	165650	532.184
31.7756	Pregn-16-ene-11,14,18,20-tetrol, 3,9-epoxy-3-methoxy-, 11,20-diacetate, (3.alpha.,5.beta.,11.alpha.,14.beta.,20R)-	51.6468	C26H38O8	38774-56-0	166311	478.257
31.8911	Oxalic acid, 2-isopropoxyphenyl hexyl ester	51.0029	C17H24O5	1000309-71-4	111091	308.162
31.9191	Tetracosamethyl-cyclododecasiloxane	65.5244	C24H72O12Si12	18919-94-3	388860	888.226
31.955	1H-Purine-6-carbonitrile	58.8944	C6H3N5	2036-13-7	693931	145.039
32.1127	[1]Benzopyrano[3,4-b][1]benzopyran-12(6H)-one, 6a,12a-dihydro-2,3,9-trimethoxy-, (6aS-cis)-	54.5452	C19H18O6	3564-85-0	128718	342.11
32.3931	Cholesterol, TMS derivative	79.1227	C30H54OSi	1856-05-9	373825	458.394
32.3931	Cholest-4-en-3-ol, (3.beta.)-, TMS derivative	54.4355	C30H54OSi	53084-65-4	83713.4	458.394
32.4423	Imidazole, 4-bromo-1-methyl-5-nitro-	52.1696	C4H4BrN3O2	59177-47-8	7.89882e+07	204.949
32.4591	Dammar-22-en-3-ol, 20,24-epoxy-24-methyl-, acetate, (3.beta.,20R,24R)-	50.2742	C33H54O3	50430-33-6	53925.6	498.407
32.561	1-Ethyl-1-(3-pentadecyloxy)-1-silacyclopentane	62.7585	C21H44OSi	1000282-47-7	233796	340.316
32.5956	1,2-Benzenediol, o-(2-chlorobenzoyl)-o'-(4-methylbenzoyl)-	50.1068	C21H15ClO4	1000325-98-8	187284	366.066
32.6177	1,2,4-benzenetricarboxylic acid, 3,5-dinitro-, trimethyl ester	55.474	C12H10N2O10	1000398-22-5	442415	342.034
32.7323	Benzamide, N-[2-(3-fluorophenyl)-5-methyl-2H-pyrazol-3-yl]-2-methyl-	57.997	C18H16FN3O	1000316-99-3	666530	309.128
32.7591	Desmosterol, TMS derivative	50.3732	C30H52OSi	18880-60-9	864960	456.379
32.7807	1,2,4-benzenetricarboxylic acid, 3,5-dinitro-, trimethyl ester	58.5301	C12H10N2O10	1000398-22-5	5.90832e+06	342.034
32.8216	L-Valine, N-(4-ethylbenzoyl)-, propyl ester	52.2382	C17H25NO3	1000346-62-9	1.20563e+06	291.183
32.8862	propanedinitrile, 2-(1-methyl-2,6-diphenyl-4(1H)-pyridinylidene)-	71.2197	C21H15N3	1000402-23-7	34879.4	309.127
33.0633	Benzoxazole, 2-[5-(4-chlorophenyl)-2-furyl]-	50.0931	C17H10ClNO2	13439-36-6	269388	295.04
33.2009	Heptadecanoic acid, 3-(acetyloxy)-16-methyl-	54.454	C20H38O4	87538-90-7	159082	342.277
33.3387	3,7-Dinitrodibenzo[a,d]cycloheptene-5-one	50.2691	C15H8N2O5	62417-95-2	31777.8	296.043
33.5095	(2-Phenyl-butanoyl)thiourea	51.171	C11H14N2OS	92491-16-2	220368	222.083
33.5106	Malonodinitrile, 2-[3-(2-hydroxyphenyl)-2-iminomethyl-1-methyl-2-propenylideno]-	53.0025	C14H11N3O	1000265-31-4	72789.1	237.09
33.7788	Methyl 2-[2-(4-chlorophenyl)-5-methyl-1H-imidazol-1-yl]dithiobenzoate	54.021	C18H15ClN2S2	105251-31-8	216950	358.037
33.8522	1-Adamantanecarboxanilide	50.7368	C17H21NO	3796-79-0	93272.7	255.162
34.5252	6-Amino-2,3-diphenylquinoxaline	54.7713	C20H15N3	1000306-77-8	136828	297.127
34.5506	.beta.-Sitosterol, TMS derivative	53.9266	C32H58OSi	2625-46-9	658217	486.426
34.5855	benzenesulfonamide, N-[4-(4-methoxybenzoyl)phenyl]-4-methyl-	50.3954	C21H19NO4S	1000398-74-9	109829	381.103
34.6998	1,3,7,9,2,8-Parazabol, 4,5,6,10,11,12-hexamethyl-2,2,8,8-tetrapropyl-	50.2435	C24H46B2N4	1000157-94-4	78834.1	412.391
34.7148	Cyclodecasiloxane, eicosamethyl-	52.8049	C20H60O10Si10	18772-36-6	202871	740.188
34.7357	Oxazolid-2-one, 4-methyl-3-acetyl-.alpha.,5-diphenyl-	51.2728	C18H17NO3	96930-16-4	121778	295.121
34.7647	(2-Oxazolidinylidene)malononitrile	54.0904	C6H5N3O	2733-51-9	230949	135.043
35.0416	6-Azaestra-1,3,5(10),6,8-pentaen-17-one, 3-methoxy-	52.3841	C18H19NO2	5144-20-7	1016.81	281.142
35.2619	2'-Hydroxypropiophenone, TMS derivative	51.2016	C12H18O2Si	33342-87-9	32139.8	222.108
35.3599	Silane, dimethyldecyloxyhexadecyloxy-	51.4811	C28H60O2Si	1000346-93-1	270347	456.436
35.3815	Silane, dimethyl(2-naphthoxy)hexadecyloxy-	58.6258	C28H46O2Si	1000347-22-1	35618.7	442.327
35.6312	L-Lysine, N6-acetyl-N2-[N-[N-[N-(N2-acetyl-N,N,N2-trimethyl-L-asparaginyl)-N-methyl-L-phenylalanyl]-N-methyl-L-phenylalanyl]-N,1-dimethyl-L-tryptophyl]-N2,N6-dimethyl-, methyl ester	50.6323	C53H72N8O9	56818-04-3	107538	964.542
35.9106	Silane, (3,3-dimethylbut-2-yloxy)-diphenyl-	50.3067	C18H24OSi	1000163-31-7	145425	284.16
35.9945	Oxazolidine, 2-ethyl-2,3-dimethyl-	54.3652	C7H15NO	89855-05-0	34864.3	129.115

## Sheet: Supplementary table 2
Retention Time (RT)	Metabolites	% similarity	Molecular Formula	CAS Number	Peak Area	Molecular Weight (MW)
9.13029	(2-Amino-4-nitro-phenyl)-phenyl-methanone	56.1466	C13H10N2O3	69636-58-4	19953.9	242.069
13.6742	(4-Methoxy-phenyl)-(10-methyl-10H-acridin-9-ylidene)-amine	52.5645	C21H18N2O	1000317-66-5	77721.2	314.142
19.0999	(Bis-butoxycarbonylmethyl-amino)-acetic acid, butyl ester	56.5254	C18H33NO6	1000318-44-9	550675	359.231
27.2952	(Z,Z)-3-Methyl-3H-cyclonona(def)biphenylene	50.1058	C18H14	110823-80-8	50195.2	230.11
14.3984	.alpha.-[2-Piperidyl]-6,8-dimethyl-3-quinolinemethanol	53.3979	C17H22N2O	30697-24-6	109578	270.173
32.4098	.alpha.-Oxo-furan-2-acetonitrile	58.8412	C6H3NO2	6047-91-2	1.43096e+07	121.016
13.0887	.beta.-Alanine, 3TMS derivative	58.1752	C12H31NO2Si3	55255-77-1	213733	305.166
17.225	.beta.-l-Rhamnofuranoside, 5-O-acetyl-2,3-O-(ethylboranediyl)-1-O-methyl-	55.6346	C11H19BO6	1000149-99-5	306947	258.127
34.5636	.beta.-Sitosterol, TMS derivative	51.0552	C32H58OSi	2625-46-9	202523	486.426
33.7698	[1,1'-Biphenyl]-4-carbonitrile, 4'-propyl-	50.8948	C16H15N	58743-76-3	168349	221.12
10.622	[1,2,4]Oxadiazole, 5-(4-tert-butylphenoxymethyl)-3-(thiophen-2-yl)-	64.4594	C17H18N2O2S	1000304-93-9	844853	314.109
24.0048	[1,4']Bipiperidinyl-4'-carboxamide, 1'-(4-chlorobenzenesulfonyl)-	53.9668	C17H24ClN3O3S	1000303-77-0	18966.6	385.123
12.5836	[6-(2-Methoxy-phenyl)-4,4-bis-trifluoromethyl-4H-[1,3,5]oxadiazin-2-yl]-dimethyl-amine	53.8775	C14H13F6N3O2	1000275-59-7	1682.78	369.091
10.3749	1(2H)-Quinolinecarboxamide, 3,4-dihydro-	51.3293	C10H12N2O	1000319-35-2	25564	176.095
6.79791	1,1,2-ethenetricarbonitrile, 2-[4-(dimethylamino)phenyl]-	60.9297	C13H10N4	1000400-82-3	122407	222.091
25.4198	1,2,5-Oxadiazolo[3,4-b]pyrazine, 5,6-di(3,5-dimethyl-1-piperidyl)-	50.3552	C18H28N6O	1000276-89-4	3197.51	344.232
7.55948	1,2,5-Triamino-1H-pyrrole-3,4-dicarbonitrile	50.8298	C6H6N6	75610-90-1	14090.7	162.065
17.2235	1,2-Cyclohexanedicarboxylic acid, 2-cyclohexylethyl hexyl ester	53.8761	C22H38O4	1000339-72-7	133217	366.277
32.3598	1,3,5,2,4,6-Triazatriphosphorine, 2,4-dibromo-2,4,6,6-tetrachloro-2,2,4,4,6,6-hexahydro-	51.7158	Br2Cl4N3P3	15964-99-5	58385.1	432.643
28.6834	1,3,5,7,9,11-Hexaethyl-5,9-dimethoxytricyclo[5.5.1.1(3,11)]hexasiloxane	50.0952	C14H36O10Si6	1000102-78-7	116713	532.092
10.0269	1,3-Propanediol, ethyl tetradecyl ether	67.1	C19H40O2	1000406-35-2	19142.8	300.303
16.7181	1,4-benzenediamine, N4,N4-dimethyl-2-[(4-methylphenyl)sulfonyl]-	50.1937	C15H18N2O2S	1000402-03-4	50198.2	290.109
20.3902	1,4-Cyclohexanedione, 2,2,6-trimethyl-	54.6084	C9H14O2	20547-99-3	7446.86	154.099
9.40638	1,5-Cyclohexadiene-1-methanol, 4-(1-methylethyl)-	59.9137	C10H16O	19876-45-0	12795.6	152.12
8.24749	1-Aminocyclopentanecarboxylic acid, N-methoxycarbonyl-, isohexyl ester	66.7491	C14H25NO4	1000328-90-1	180277	271.178
11.2777	1-Cyano-4-diphenyl(tert-butyl)silyloxybenzene	60.5969	C23H23NOSi	1000307-86-7	1767.16	357.155
11.5176	1-Cyano-4-diphenyl(tert-butyl)silyloxybenzene	58.2145	C23H23NOSi	1000307-86-7	25781.5	357.155
10.9563	1-Cyano-4-diphenyl(tert-butyl)silyloxybenzene	72.0574	C23H23NOSi	1000307-86-7	99618.6	357.155
10.5768	1-Cyano-4-diphenyl(tert-butyl)silyloxybenzene	77.6895	C23H23NOSi	1000307-86-7	104616	357.155
22.3349	1-Cyano-4-diphenyl(tert-butyl)silyloxybenzene	50.7172	C23H23NOSi	1000307-86-7	51060	357.155
10.4814	1-Ethanone, 1-(1H-indol-6-yl)-2-(4-morpholinyl)-	51.0051	C14H16N2O2	1000350-64-3	20039.3	244.121
14.7509	1-Formyl-2-phenyl-5-methyl-pyrrole	50.4104	C12H11NO	124647-56-9	200426	185.084
7.39737	1H,5H-benzo[ij]quinolizine, 9,9'-[1,4-phenylenedi-2,1-ethenediyl]bis[2,3,6,7-tetrahydro-8-methoxy-	57.5567	C36H40N2O2	1000399-73-7	2676.35	532.309
7.92771	1H-Benzimidazole, 2(1,2,2,2-tetrafluoroethyl)-	58.3498	C9H6F4N2	41185-74-4	21187.1	218.047
11.1815	1H-Benzo[f]cyclopenta[c]quinoline, 2,3-dihydro-4-(2-furyl)-	52.0247	C20H15NO	1000276-59-5	73991.4	285.115
5.19947	1H-Cyclopropa[3,4]benz[1,2-e]azulene-5,7b,9,9a-tetrol, 1a,1b,4,4a,5,7a,8,9-octahydro-3-(hydroxymethyl)-1,1,6,8-tetramethyl-, 5,9,9a-triacetate, [1aR-(1a.alpha.,1b.beta.,4a.beta.,5.beta.,7a.alpha.,7b.alpha.,8.alpha.,9.beta.,9a.alpha.)]-	56.555	C26H36O8	77508-64-6	228463	476.241
29.4539	1H-Cyclopropa[3,4]benz[1,2-e]azulene-5,7b,9,9a-tetrol, 1a,1b,4,4a,5,7a,8,9-octahydro-3-(hydroxymethyl)-1,1,6,8-tetramethyl-, 9,9a-diacetate, [1aR-(1a.alpha.,1b.beta.,4a.beta.,5.beta.,7a.alpha.,7b.alpha.,8.alpha.,9.beta.,9a.alpha.)]-	52.5394	C24H34O7	77508-65-7	194940	434.23
22.8442	1-Hexadecanol, TBDMS derivative	56.4696	C22H48OSi	76358-80-0	61285.9	356.347
10.9171	1-Hexanamine, 2-ethyl-N-(2-ethylhexyl)-	66.0134	C16H35N	106-20-7	239995	241.277
34.9387	1H-Imidazole-4,5-dicarboxylic acid, 4-[(4-fluoro-phenyl)-amide] 5-methylamide	52.89	C12H11FN4O2	1000318-42-9	31505.3	262.087
10.0857	1H-Indene, 1-ethyl-2,3-dihydro-1-methyl-	52.7966	C12H16	56298-75-0	142350	160.125
10.3879	1H-Indole-3-acetaldehyde, 5-hydroxy-	70.9017	C10H9NO2	1892-21-3	217730	175.063
11.8232	1H-Pyrrole-2,5-dicarboxylic acid, 3-ethyl-4-methyl-, 5-ethyl 2-(phenylmethyl) ester	51.9615	C18H21NO4	35889-90-8	375.38	315.147
14.3708	1-Isopropoxy-2-trihexylsilyloxybenzene	53.8608	C27H50O2Si	1000299-09-5	76582.7	434.358
9.47036	1-Methoxy-3-keto-4-methyl-1,4-pentadiene	50.1202	C7H10O2	52204-73-6	14671.4	126.068
14.1516	1-Methyl-3-.beta.-d-ribofuranosylpyrazolo[4,3-d]pyrimidin-7-one	62.6021	C11H14N4O5	74024-59-2	115751	282.096
27.3359	1-Monopalmitin, 2TMS derivative	75.8703	C25H54O4Si2	1188-74-5	4.45791e+06	474.356
6.03374	1-Propanamine, N,2-dimethyl-	66.8219	C5H13N	625-43-4	528330	87.105
14.7067	1-Triazene, 1,3-bis[2-(trifluoromethyl)phenyl]-	65.0036	C14H9F6N3	7639-93-2	9429.67	333.07
20.615	1-Triethylsilyloxytetradecane	54.4817	C20H44OSi	163015-55-2	70821.6	328.316
10.5351	2-(2(3H)-Oxo-4H-1,4-benzoxazin-4-yl)acetic acid	54.6789	C10H9NO4	6243-07-08	128895	207.053
21.0786	2-(4-Iodobenzyl)cyclopentanone	52.3909	C12H13IO	1000311-91-2	1695.88	300.001
15.1749	2,2'-Bibenzothiazole	51.0399	C14H8N2S2	4271-09-04	711015	268.013
28.6899	2,3-quinoxalinediamine, 6-nitro-N2,N3-diphenyl-	55.1652	C20H15N5O2	1000402-55-9	187528	357.123
29.6033	2,4,6,8,10-Tetradecapentaenoic acid, 9a-(acetyloxy)-1a,1b,4,4a,5,7a,7b,8,9,9a-decahydro-4a,7b-dihydroxy-3-(hydroxymethyl)-1,1,6,8-tetramethyl-5-oxo-1H-cyclopropa[3,4]benz[1,2-e]azulen-9-yl ester, [1aR-(1a.alpha.,1b.beta.,4a.beta.,7a.alpha.,7b.alpha.,8.alpha.,9.beta.,9a.alpha.)]-	51.6009	C36H46O8	77550-17-5	435622	606.319
8.1476	2,4,6,8-Tetrathiaadamantane, 9,9-dimethyl-	66.2676	C8H12S4	17749-63-2	432236	235.982
34.7205	2,4-Diamino-6-[[5-bromo-4-phenyl-2-thiazolyl]thio]quinazoline	56.0079	C17H12BrN5S2	74396-40-0	125247	428.972
28.6781	2,4-Diamino-6-[[5-bromo-4-phenyl-2-thiazolyl]thio]quinazoline	54.0486	C17H12BrN5S2	74396-40-0	264779	428.972
10.7023	2,4-Imidazolidinedithione, 5,5-diphenyl-	52.4557	C15H12N2S2	2032-13-5	1633.31	284.044
10.7786	2,6-Difluoro-3-methylbenzoic acid, pentafluorobenzyl ester	58.0596	C15H7F7O2	1000343-75-4	1.46061e+06	352.033
8.22728	2,6-Difluorobenzoic acid, phenyl ester	61.0598	C13H8F2O2	1000292-62-2	5625.7	234.049
7.72293	2,6-diphenyl-3,4-dimethylpyridine	58.1906	C19H17N	1000379-00-8	8.65323e+06	259.136
5.20914	2-[4-methyl-6-(2,6,6-trimethylcyclohex-1-enyl)hexa-1,3,5-trienyl]cyclohex-1-en-1-carboxaldehyde	51.0592	C23H32O	1000216-09-2	353999	324.245
11.1117	2-Amino1-(4-hydroxyphenyl)-5-phenyl-1H-pyrrole-3,4-dicarbonitrile	62.8816	C18H12N4O	1000327-07-1	97581.3	300.101
11.853	2-Butenedioic acid, (E)-, 2TMS derivative	58.0219	C10H20O4Si2	17962-03-7	120998	260.09
10.5907	2-Chloro-5-nitrocinnamic acid	59.8554	C9H6ClNO4	36015-19-7	9270.06	226.999
9.40646	2-Dicyanomethylpyrimidine	61.583	C7H4N4	1000070-46-4	23578.4	144.044
8.17497	2H-1-Benzopyran-2-one, 7-(diethylamino)-4-methyl-	67.3881	C14H17NO2	91-44-1	161931	231.126
16.2521	2H-pyrrol-2-one, 1-[4-(dimethylamino)phenyl]-1,3-dihydro-3,3,4,5-tetraphenyl-	66.607	C36H30N2O	1000399-64-6	16828.9	506.236
14.8308	2-Iodo-4-methyl-6-nitrophenol	56.9844	C7H6INO3	69492-91-7	69592.5	278.939
20.1376	2-Methoxybenzylamine, N,N-bis(pentafluoropropionyl)-	62.2784	C14H9F10NO3	1000417-64-5	67454.9	429.042
9.0245	2-Methyl-4-phenyl-2,3-dihydro-1,5-benzothiazepine	54.2865	C16H15NS	74148-61-1	13010.1	253.093
28.7896	2-Monostearin, 2TMS derivative	72.9503	C27H58O4Si2	53336-13-3	86563.7	502.387
27.0167	2-Palmitoylglycerol, 2TMS derivative	73.4327	C25H54O4Si2	53212-97-8	931195	474.356
10.1999	2-Phenazinecarbonitrile, 7-amino-	51.4751	C13H8N4	18450-22-1	1720.81	220.075
7.71404	2-Propanol, 1,1',1''-nitrilotris-	54.376	C9H21NO3	122-20-3	134603	191.152
5.56928	2-Propanol, 1-chloro-	50.5209	C3H7ClO	127-00-4	148251	94.019
6.67767	2-Propenoic acid, 2-methyl-, 2-chloroethyl ester	51.7649	C6H9ClO2	1888-94-4	71173.1	148.029
21.798	2-p-Tolyl-6-(4-trifluoromethyl-phenyl)-pyridine	52.5864	C19H14F3N	1000193-41-2	20416.4	313.108
9.94809	3-(2-Hydroxyethyl)imidazole-2-thione	54.0874	C5H8N2OS	23328-89-4	2111.37	144.036
22.2587	3-(3,4,5-Trimethoxyphenyl)propionic acid	51.8228	C12H16O5	25173-72-2	5878.52	240.1
8.5464	3-(3-Hydroxyphenyl)-3-trifluoromethyl-3H-diazirine	53.2059	C8H5F3N2O	113787-85-2	29809.3	202.035
8.14019	3,4-Dihydroisoquinoline, 6,7,8-trimethoxy-1-methyl-	53.7707	C13H17NO3	4838-98-6	3.34874e+06	235.121
17.1748	3,4-Hexanedione, 2,2,5-trimethyl-	51.3561	C9H16O2	20633-03-8	68616	156.115
11.5777	3,5-Bis(trifluoromethyl)benzylamine, N-tert-butyldimethylsilyl-	60.9664	C15H21F6NSi	1000417-33-0	18053.5	357.135
10.4729	3,5-Dinitro-1H-pyrazole	50.8772	C3H2N4O4	38858-89-8	281779	158.008
14.8445	3,5-di-tert-Butyl-4-hydroxyphenylpropionic acid	76.7454	C17H26O3	20170-32-5	7.65846e+06	278.188
12.5412	3,5-Pyridinedicarboxylic acid, 1,4-dihydro-4-(4-methoxyphenyl)-1,2,6-trimethyl-, diethyl ester	63.809	C21H27NO5	42972-34-9	56991.9	373.189
35.0203	3,9-Epoxypregn-16-en-18-al, 11,20-diacetoxy-3-methoxy-14-(methylthiomethoxy)-	51.4541	C28H40O8S	1000195-10-3	317414	536.244
7.63018	3-Amino-1H-quinazoline-2,4-dione	53.4918	C8H7N3O2	30386-01-7	361.251	177.054
15.9404	3-Amino-s-triazole	62.0312	C2H4N4	61-82-5	58963	84.044
22.2074	3-Fluoro-5-trifluoromethylbenzoic acid, 4-methoxyphenyl ester	55.7408	C15H10F4O3	1000357-96-0	1055.98	314.057
14.8557	3-Formyl-1-(1-naphtyl)-2(1H)-pyridone	53.0783	C16H11NO2	1000306-47-0	111669	249.079
32.2511	3H-1,2-Dithiol-3-one, 5-methyl-	53.6124	C4H4OS2	3620-08-04	82645.2	131.97
27.6947	3H-Benzimidazol-7-ol, 3-methyl-2,6-diphenyl-	53.3009	C20H16N2O	313402-81-2	32898	300.126
16.8929	3-Methoxy-17a.beta.-methyl-17a.alpha.-acetoxy-D-homoestra-1,3,5(10),8-tetraen	61.9343	C23H30O3	4978-08-09	137140	354.219
8.99152	3-Methylthio-6-(N-morpholino)-1,2,4-triazolo[4,3-b][1,2,4,5]tetrazine	55.5944	C8H11N7OS	1000284-76-7	61413.9	253.075
19.0979	3-Pyrrolidinylidenmalononitril, 1,2,2-trimethyl-	50.9493	C10H13N3	1000150-33-0	122130	175.111
11.0633	3-Trifluoromethylbenzylamine, N,N-bis(2-ethylhexyl)-	54.4845	C24H40F3N	1000310-29-3	169574	399.311
21.6806	3-Tripropylsilyloxytridecane	53.7185	C22H48OSi	1000280-54-7	62203.3	356.347
29.2093	4-(Acridin-9-ylamino)-2,6-di-tert-butyl-phenol	66.4782	C27H30N2O	1000317-43-0	22097.7	398.236
23.8762	4,4'-Dimethoxy-1,1'-dioxo-(1,1',2,2')-tetrahydro-2,2'-binaphthylidene	51.106	C22H16O4	1244-92-4	488228	344.105
6.87581	4,6-Heptadiyn-3-one	50.0518	C7H6O	29743-27-9	8758.6	106.042
22.5309	4-Amino-2-butyl-N-(tert-butylimino)-1-oxo-1$l^{5},2,3-triazol-5-imine oxide	58.4123	C10H20N6O2	1000411-43-7	138277	256.165
14.6826	4-Aminobutanoic acid, 3TMS derivative	85.3089	C13H33NO2Si3	39508-23-1	6.8251e+06	319.182
13.3103	4-Aminononafluorobenzophenone	52.3281	C13H2F9NO	1000298-94-6	30032.8	358.999
5.37538	4-Butylphenyl isothiocyanate	59.7429	C11H13NS	23165-44-8	407892	191.077
32.822	4-Ethylbenzoic acid, hex-4-yn-3-yl ester	52.6121	C15H18O2	1000292-54-3	763414	230.131
12.0443	4-Formyl-2-methoxyphenyl 5-formyl-2,3-methylenedioxyphenyl ether	56.6506	C16H12O6	1000242-81-0	136127	300.063
23.9259	4H-1-Benzopyran-4-one, 3-(3,4-dimethoxyphenyl)-6,7-dimethoxy-	50.8495	C19H18O6	24126-93-0	59474.8	342.11
24.3517	4H-Cyclopropa[5',6']benz[1',2':7,8]azuleno[5,6-b]oxiren-4-one, 8,8a-bis(acetyloxy)-2a-[(acetyloxy)methyl]-1,1a,1b,1c,2a,3,3a,6a,6b,7,8,8a-dodecahydro-6b-hydroxy-3a-methoxy-1,1,5,7-tetramethyl-, [1aR-(1a.alpha.,1b.beta.,1c.alpha.,2a.alpha.,3a.alpha.,6a.alpha.,6b.alpha.,7.alpha.,8.beta.,8a.alpha.)]-	53.1922	C27H36O10	64869-55-2	126571	520.231
23.8888	4-Hydroxy-.gamma.-(4-hydroxyphenyl)-.gamma.-methylbenzenebutanoic acid, methyl ester	53.3665	C18H20O4	7297-85-0	62564.4	300.136
28.9778	4-Hydroxyanthraquinone-2-carboxylic acid, di-TMS	68.4871	C21H24O5Si2	1000103-01-3	86300.2	412.116
30.6117	4-Hydroxybenzyl alcohol, 2TBDMS derivative	54.0718	C19H36O2Si2	1000364-43-9	243557	352.225
31.5656	4-O-Methyl-12b,13,20-triacetoxy-2,9-dihydroxy-3a-carboxy-2,3-seco-tigla-1(10),6-diene-3,9-lactone	53.1209	C27H36O10	1000203-00-9	597440	520.231
25.2414	4-O-Methyl-12b,13,20-triacetoxy-2,9-dihydroxy-3a-carboxy-2,3-seco-tigla-1(10),6-diene-3,9-lactone	50.2701	C27H36O10	1000203-00-9	158370	520.231
6.65713	4-Penten-2-ol, acetate	52.8788	C7H12O2	1000352-31-5	8031.49	128.084
17.4766	4-Phenoxyphenylamine, N-methoxycarbonyl-	57.8309	C14H13NO3	1000343-98-5	32411	243.09
10.5766	4-Phenylthiomethyl-6-piperidino-1,3,5-triazin-2-amine	55.0003	C15H19N5S	22362-20-5	108678	301.136
10.6565	4-Phenylthiomethyl-6-piperidino-1,3,5-triazin-2-amine	56.5711	C15H19N5S	22362-20-5	50357.9	301.136
6.2832	4-Pyridinol, TMS derivative	76.7451	C8H13NOSi	1000352-50-3	1.05395e+06	167.077
16.5712	5H-[1]Benzopyrano[4,3-d]pyrimidin-5-one, 2-(4-pyridinyl)-	51.0251	C16H9N3O2	1000337-49-7	129664	275.069
23.0341	5-Methyl-2,4-thiophenedicarboxylic acid	53.0502	C7H6O4S	32415-31-9	6304.88	185.999
16.1743	5-Methylsalicylic acid, 2TMS derivative	60.8223	C14H24O3Si2	1000153-59-4	163352	296.126
21.9312	6-(4-Fluoro-phenyl)-benzo[4,5]imidazo[1,2-c]quinazoline	54.7897	C20H12FN3	70371-91-4	4212.45	313.102
10.7955	6-(Methylsulfanyl)-4-oxo-4,5-dihydro-1H-pyrazolo[3,4-d]pyrimidine-3-carboxamide	59.3553	C7H7N5O2S	96555-43-0	1378.17	225.032
26.6734	6-Azacholest-4-en-7-one, 6-benzyl-3.alpha.-hydroxy-	53.4059	C33H49NO2	17373-01-2	83176.4	491.376
21.7753	6H-Dibenzo(b,d)pyran-1-ol, 3-hexyl-7,8,9,10-tetrahydro-6,6,9-trimethyl-	54.993	C22H32O2	117-51-1	28263.6	328.24
9.49387	7(1H)-Pteridinone	59.9601	C6H4N4O	2432-27-1	24188.7	148.039
29.0938	7-Chloro-2,3-dihydro-3-(4-N,N-dimethylaminobenzylidene)-5-phenyl-1H-1,4-benzodiazepin-2-one	52.9754	C24H20ClN3O	55056-35-4	117595	401.129
32.4455	8-Chloro-5-quinolinecarboxylic acid	54.2753	C10H6ClNO2	121490-68-4	4.04986e+07	207.009
16.8605	9(10H)-Acridinone, 1-hydroxy-2,3,4-trimethoxy-10-methyl-	51.1896	C17H17NO5	7008-68-6	6807.08	315.111
26.5013	9-(2-p-Tolylethyl)-3,4,5,6,7,9-hexahydro-2H-xanthene-1,8-dione	57.988	C22H24O3	299945-39-4	284343	336.173
12.4336	9H-carbazole, 2-ethenyl-9-ethyl-	50.3525	C16H15N	1000400-80-9	442.318	221.12
13.5725	Acetamide, 2-chloro-N-(ethoxymethyl)-N-(2-ethyl-6-methylphenyl)-	50.5651	C14H20ClNO2	34256-82-1	19987.5	269.118
10.5679	Acetic acid, 2-[(2-hydroxy-1,2-diphenylethyl)amino]-, ethyl ester	52.6293	C18H21NO3	1000197-16-6	16442.2	299.152
27.7578	Adenosine, 4TMS derivative	65.2685	C22H45N5O4Si4	53294-33-0	231521	555.255
31.5224	Adipic acid, 3-hexyl tridecyl ester	51.2504	C25H48O4	1000353-63-2	201542	412.355
16.0462	Ambucetamide	51.2587	C17H28N2O2	519-88-0	114728	292.215
25.1791	Arachidonic acid, TMS derivative	80.7059	C23H40O2Si	113516-18-0	1.19267e+06	376.28
16.8883	As-indacene-4,5-dicarboxylic acid, 1,2,3,3a.alpha.,4.alpha.,5.beta.,5a.alpha.,6,7,8-decahydro-, dimethyl ester	52.0912	C16H22O4	29365-47-7	57636.1	278.152
10.7225	benzaldehyde, 4-(diethylamino)-2-methoxy-	61.505	C12H17NO2	1000400-54-6	43915.1	207.126
32.6482	Benzamide, 4-butyl-N-benzyl-N-phenethyl-	53.384	C26H29NO	1000340-30-6	51850.8	371.225
18.2432	Benzamide, N,N-diheptyl-2-trifluoromethyl-	50.7446	C22H34F3NO	1000308-53-6	42956.4	385.259
11.4887	benzenamine, 4-(diphenylmethyl)-N,N-diethyl-	54.9762	C23H25N	1000402-28-8	58274.7	315.199
8.56134	benzenamine, 4-[bis[4-[bis(4-methylphenyl)amino]phenyl]methyl]-N,N-diethyl-3-methyl-	55.4525	C52H53N3	1000400-00-6	1545.04	719.424
17.7622	benzenamine, 4-ethenyl-N,N-bis(4-methylphenyl)-	57.9714	C22H21N	1000402-13-9	29413.3	299.167
34.3263	benzenamine, N,N-dibutyl-3-methyl-4-nitro-	51.1834	C15H24N2O2	1000401-62-4	78255.9	264.184
28.3204	Benzene, 1,1',1'',1'''-(1,3-butadiene-1,4-diylidene)tetrakis-	50.0789	C28H22	1450-63-1	49649.4	358.172
26.4375	benzene, 1,1'-methylenebis[3-(1,1-dimethylethyl)-5-methyl-4-[(trimethylsilyl)oxy]-	71.186	C29H48O2Si2	1000399-56-2	1.43742e+06	484.319
6.53177	Benzene, 1,4-difluoro-2,3-dimethyl-	58.7929	C8H8F2	1736-90-9	19812.4	142.059
11.3231	Benzene, 1-fluoro-3-iodo-	57.0159	C6H4FI	1121-86-4	9438.03	221.934
12.8443	benzenepropanoic acid, 4-[(4-formylphenyl)phenylamino]-, ethyl ester	65.2559	C24H23NO3	1000398-64-6	79251	373.168
12.8528	benzenepropanoic acid, 4-[(4-formylphenyl)phenylamino]-, ethyl ester	55.2713	C24H23NO3	1000398-64-6	148060	373.168
12.7883	benzenepropanoic acid, 4-[(4-formylphenyl)phenylamino]-, ethyl ester	68.4879	C24H23NO3	1000398-64-6	39290.5	373.168
16.1229	Benzimidazo[2,1-a]isoquinoline	62.1868	C15H10N2	239-44-1	111845	218.084
18.9583	Benzo[b]thiophene-3-carboxylic acid, 7-acetoxy-2-acetylamino-6-bromo-, ethyl ester	52.8072	C15H14BrNO5S	1000302-32-9	1169.61	398.978
30.009	Benzoic acid, 2-(benzoylphenylamino)-3-methyl-	50.9777	C21H17NO3	50405-25-9	22062.8	331.121
8.10567	Benzoic acid, 2-methoxy-, (octahydro-2H-quinolizin-1-yl)methyl ester	52.5972	C18H25NO3	1000337-21-8	99252.9	303.183
9.26307	Benzoic acid, 4,5-dimethoxy-2-nitro-, methyl ester	58.0459	C10H11NO6	26791-93-5	11397.7	241.059
7.86005	Benzoic acid, 4-[(1,2-dihydro-2-oxo-4-pyrimidinyl)amino]-, methyl ester	54.5592	C12H11N3O3	145820-06-0	17162	245.08
14.9052	benzonitrile, 2-(butylamino)-3,5-dinitro-	50.1274	C11H12N4O4	1000401-61-2	45785.5	264.086
8.6382	Benzonitrile, 3,5-bis(1,1-dimethylethyl)-4-hydroxy-	56.2284	C15H21NO	1988-88-1	314467	231.162
7.25997	Bicyclo[3.2.0]hept-6-ene	50.4019	C7H10	4927-03-01	14379.5	94.078
13.7844	Bis(trimethylsilyl)phosphite	51.5136	C6H19O3PSi2	1000334-84-1	42389.4	226.061
13.4948	Bismuthine, tripropyl-	52.4839	C9H21Bi	3692-82-8	21435.1	338.145
29.4335	Bisphenol A monomethyl ether, TMS derivative	56.5831	C19H26O2Si	1000283-55-5	33009.4	314.17
27.0508	Butyl 4,7,10,13,16,19-docosahexaenoate	62.5555	C26H40O2	1000336-80-3	173048	384.303
11.9091	Butylphosphonic acid, 4-(2-phenylprop-2-yl)phenyl propyl ester	59.4708	C22H31O3P	1000323-09-1	98570.5	374.201
5.72639	Carbonic acid, monoamide, N-2-ethylhexyl-, propyl ester	61.6373	C12H25NO2	1000415-25-1	334677	215.189
32.3892	Cholesterol, TMS derivative	70.5206	C30H54OSi	1856-05-9	1.38061e+07	458.394
11.9823	Chromone, 5,7-dihydroxy-6-isopentyl-2-methyl-	51.9129	C15H18O4	13475-07-5	58912.6	262.121
15.6353	Conanine, (5.alpha.)-	53.1988	C22H37N	468-33-7	15735.6	315.293
10.8633	Conanine, (5.alpha.)-	53.5342	C22H37N	468-33-7	22645.7	315.293
12.9052	Conanine, (5.alpha.)-	51.0881	C22H37N	468-33-7	32940.1	315.293
12.1424	Conanine, (5.alpha.)-	50.0032	C22H37N	468-33-7	148246	315.293
15.0236	Creatinine - 3TMS Derivative	81.1871	C13H31N3OSi3	1000333-94-7	5.22807e+06	329.177
28.6874	Cyclodecasiloxane, eicosamethyl-	74.7615	C20H60O10Si10	18772-36-6	878185	740.188
21.855	Cyclodecasiloxane, eicosamethyl-	70.8641	C20H60O10Si10	18772-36-6	626821	740.188
30.8576	Cyclodecasiloxane, eicosamethyl-	68.712	C20H60O10Si10	18772-36-6	319473	740.188
29.7981	Cyclodecasiloxane, eicosamethyl-	73.519	C20H60O10Si10	18772-36-6	813185	740.188
31.9259	Cyclodecasiloxane, eicosamethyl-	65.8463	C20H60O10Si10	18772-36-6	330652	740.188
27.4831	Cyclodecasiloxane, eicosamethyl-	74.086	C20H60O10Si10	18772-36-6	856857	740.188
24.8514	Cyclodecasiloxane, eicosamethyl-	73.4599	C20H60O10Si10	18772-36-6	556975	740.188
20.1579	Cyclodecasiloxane, eicosamethyl-	58.7904	C20H60O10Si10	18772-36-6	98294.8	740.188
13.727	Cycloheptasiloxane, tetradecamethyl-	56.206	C14H42O7Si7	107-50-6	196189	518.132
11.0029	Cyclohexasiloxane, dodecamethyl-	73.9638	C12H36O6Si6	540-97-6	135394	444.113
18.275	Cyclononasiloxane, octadecamethyl-	78.4451	C18H54O9Si9	556-71-8	355969	666.169
16.1664	Cyclooctasiloxane, hexadecamethyl-	79.6365	C16H48O8Si8	556-68-3	391107	592.15
7.0619	Cyclopentane, (2-methylbutyl)-	57.2692	C10H20	53366-38-4	63355	140.157
16.7981	Cyclopropanecarbonitrile, 2-[p-(dimethylamino)phenyl]-1-(p-nitrophenyl)-	59.2162	C18H17N3O2	28752-34-3	49559.8	307.132
19.6997	D-Allose, pentakis(trimethylsilyl) ether, methyloxime (syn)	55.9619	C22H55NO6Si5	1000380-19-7	65572.5	569.288
16.7983	D-Arabinose, tetrakis(trimethylsilyl) ether, ethyloxime (isomer 2)	67.0456	C19H47NO5Si4	1000394-64-9	50202.5	481.253
5.29688	Decane	57.3411	C10H22	124-18-5	166978	142.172
19.063	Decane, 3,8-dimethyl-	51.6623	C12H26	17312-55-9	796.694	170.203
5.43086	Diallyl disulphide	50.2493	C6H10S2	2179-57-9	71752.9	146.022
21.873	Dibenz[a,h]anthracene, 5,12-diphenyl-	51.324	C34H22	14474-66-9	38747.5	430.172
23.9737	Dibenz[b,d]cycloheptane, 2,4,7-trimethoxy-11-acetamino-	53.4115	C20H23NO4	1000126-71-9	39272.1	341.163
12.0275	Dibenz[b,d]cycloheptanol, 2,3,9-trimethoxy-	57.5407	C18H20O4	145068-62-8	145100	300.136
11.7627	Dibenz[b,d]cycloheptanol, 2,3,9-trimethoxy-	64.0012	C18H20O4	145068-62-8	522.754	300.136
11.3087	Dibenz[b,d]cycloheptanol, 2,3,9-trimethoxy-	61.1979	C18H20O4	145068-62-8	51627.3	300.136
26.46	Dibenzo(b,f)(1,5)diazocine, 2,8-dichloro-6,12-diphenyl-	55.4819	C26H16Cl2N2	3646-61-5	21378.6	426.069
22.0232	Dihexyl thiodiglycollate	54.7173	C16H30O4S	108199-19-5	12158.6	318.186
26.2795	Diiodoethylarsine	50.2625	C2H5AsI2	20738-28-7	34806.6	357.77
24.7987	Dimethyl 9,10,19,20-tetrahydrotetrabenzo[b,d,H,j][1,6]diazacyclododecine-2,7-dicarboxylate	53.5736	C30H26N2O4	74199-62-5	42962.3	478.189
10.0679	Di-trimethylsilyl peroxide	61.3614	C6H18O2Si2	5796-98-5	321407	178.085
25.5529	D-Myo-Inositol, 1,2,4,5,6-pentakis-O-(trimethylsilyl)-, bis(trimethylsilyl) phosphate	77.9753	C27H69O9PSi7	55568-91-7	1.29439e+06	764.306
9.31426	Dodecane	81.3773	C12H26	112-40-3	1.00009e+06	170.203
9.69572	Dodecane, 4-methyl-	73.6108	C13H28	6117-97-1	102454	184.219
22.5312	Eicosane	65.9616	C20H42	112-95-8	160927	282.329
20.0182	Eicosane	56.1749	C20H42	112-95-8	770.141	282.329
18.2765	Estra-1,3,5(10)-trien-17-one, 2-[(trimethylsilyl)amino]-3-[(trimethylsilyl)oxy]-	56.1307	C24H39NO2Si2	77883-26-2	213649	429.252
8.38148	Ethanamine, 2TMS derivative	68.6896	C8H23NSi2	2477-39-6	226614	189.137
11.7275	ethanol, 2,2'-[(1-methylethylidene)bis(4,1-phenyleneoxy)]bis-	52.4856	C19H24O4	1000402-29-3	127072	316.167
10.3795	Ethanolamine, 3TMS derivative	74.4006	C11H31NOSi3	5630-81-9	1.28243e+06	277.171
8.18259	Ethanone, 1,1'-(6-methoxy-2,5-benzofurandiyl)bis-	59.8164	C13H12O4	23840-15-5	16254.5	232.074
33.3336	Ethanone, 1-[5-hydroxy-1-(2-methoxyphenyl)-2-methylindol-3-yl]-	69.6291	C18H17NO3	5165-59-3	106925	295.121
21.3978	Ethyl .alpha.-fluoro-3-phenoxy-cinnamate	55.5631	C17H15FO3	1000148-61-0	341645	286.101
14.7433	Ethyl 2-cyano-2-(9-fluorenylidene)acetate	53.7956	C18H13NO2	14003-25-9	228987	275.095
35.1829	Ethylamine, N,N-didecyl-2-(2-thiophenyl)-	62.9798	C26H49NS	1000310-35-0	156543	407.359
32.7323	Ethylamine, N,N-didecyl-2-(2-thiophenyl)-	59.2121	C26H49NS	1000310-35-0	26637.3	407.359
34.6728	Ethylamine, N,N-dinonyl-2-(2-thiophenyl)-	52.3725	C24H45NS	1000310-34-9	68938.2	379.327
9.63611	Ethylphosphonic acid, 2TMS derivative	59.188	C8H23O4PSi2	17882-98-3	100988	270.087
8.15471	Formetorex	57.7002	C10H13NO	15302-18-8	57746.6	163.1
21.7146	Fumaric acid, di(2,2,3,3,4,4,5,5-octafluoropentyl) ester	63.6877	C14H8F16O4	1000348-79-7	921.144	544.017
5.60762	Furan, 3-bromo-	53.063	C4H3BrO	22037-28-1	77362.1	145.937
16.0297	Glutaric acid, 2-methylpent-3-yl 2,2,3,3,3-pentafluoropropyl ester	61.145	C14H21F5O4	1000393-66-7	23173.9	348.136
23.5676	Glutaric acid, di(2-fluoroethyl) ester	50.973	C9H14F2O4	1000393-72-3	60349.5	224.086
29.1086	Glycerol monostearate, 2TMS derivative	81.9063	C27H58O4Si2	1188-75-6	4.054e+06	502.387
10.5056	Glycerol, 3TMS derivative	75.7099	C12H32O3Si3	6787-10-06	2.87732e+06	308.166
11.0564	Glycine, 3TMS derivative	80.9975	C11H29NO2Si3	5630-82-0	2.76693e+06	291.151
14.7399	glycine, N,N-bis(2-methoxy-2-oxoethyl)-, methyl ester	53.9248	C9H15NO6	1000401-04-5	1.10444e+06	233.09
14.1203	Heneicosane	76.2937	C21H44	629-94-7	560425	296.344
10.6135	Heneicosane	61.9366	C21H44	629-94-7	1.12881e+06	296.344
11.4158	Heptadecane, 2-methyl-	59.9788	C18H38	1560-89-0	41812	254.297
22.776	Heptadecanoic acid, TMS derivative	78.2544	C20H42O2Si	55517-58-3	1.10717e+07	342.295
6.38263	Heptafluorobutyric acid, 3,5-dimethylphenyl ester	54.7089	C12H9F7O2	1000307-62-9	57483.5	318.049
5.94391	Heptane, 4-ethyl-	76.2177	C9H20	2216-32-2	296233	128.157
25.6897	Heptasiloxane, hexadecamethyl-	54.1545	C16H48O6Si7	541-01-5	424675	532.184
22.6864	Heptasiloxane, hexadecamethyl-	60.6772	C16H48O6Si7	541-01-5	166653	532.184
28.3045	Heptasiloxane, hexadecamethyl-	58.4262	C16H48O6Si7	541-01-5	437279	532.184
21.0003	Heptasiloxane, hexadecamethyl-	61.5707	C16H48O6Si7	541-01-5	136104	532.184
29.4941	Heptasiloxane, hexadecamethyl-	55.7156	C16H48O6Si7	541-01-5	546010	532.184
26.9248	Hexadecanoic acid, 1a,2,5,5a,6,9,10,10a-octahydro-5a-hydroxy-4-(hydroxymethyl)-1,1,7,9-tetramethyl-6,11-dioxo-1H-2,8a-methanocyclopenta[a]cyclopropa[e]cyclodecen-5-yl ester, [1aR-(1a.alpha.,2.alpha.,5.beta.,5a.beta.,8a.alpha.,9.alpha.,10a.alpha.)]-	52.0652	C36H56O6	77508-69-1	320670	584.408
27.5762	Hydrocortisone 21-acetate, bis(O-methyloxime)	52.2602	C25H38N2O6	1000394-54-6	215346	462.273
7.95279	Imidazole, 4-(4-methoxyphenyl)-5-nitro-	50.6486	C10H9N3O3	65447-41-8	27796	219.064
9.25478	Indeno[2',1':4,5]thieno[3,2-b]thiopyran	57.2982	C14H8S2	56830-85-4	19009.6	240.007
22.0758	Indol-2(3H)-one, 3-(4-cyanophenylimino)-5-nitro-	62.3773	C15H8N4O3	303213-96-9	72848.2	292.06
13.0461	Indoline, 2,3-diethyl-3-methyl-	55.7484	C13H19N	18781-60-7	115828	189.152
27.555	Indolizine, 2-(4-methylphenyl)-	51.6713	C15H13N	7496-81-3	57701.1	207.105
27.1694	Inosine, 4TMS derivative	78.2701	C22H44N4O5Si4	1000332-74-7	135701	556.239
19.7131	Iron, (.eta.-4-naphthalene)(.eta.-5-pentamethylcyclopentadienyl)-	56.785	C20H23Fe	1000161-39-4	27602.6	319.115
8.77736	Iron, (.eta.5-2,4-cyclopentadien-1-yl)[(1,2,3,3a,7a-.eta.)-4,5,6,7-tetrahydro-1H-inden-1-yl]-	55.5859	C14H16Fe	33039-67-7	44952.9	240.06
35.6852	Isonipecotic acid, N-(bromoacetyl)-, decyl ester	52.2226	C18H32BrNO3	1000361-53-9	50858.1	389.157
21.1148	Isophthalic acid, 2,7-dimethyloct-7-en-5-yn-4-yl propyl ester	55.4103	C21H26O4	1000343-84-5	28131.8	342.183
31.5103	Isophthalic acid, 2,7-dimethyloct-7-en-5-yn-4-yl propyl ester	56.5936	C21H26O4	1000343-84-5	197940	342.183
14.2676	Isophthalic acid, 2-fluorophenyl propyl ester	52.1448	C17H15FO4	1000344-65-0	363126	302.095
16.8085	Isophthalic acid, allyl isobutyl ester	50.1941	C15H18O4	1000345-64-3	940.532	262.121
15.107	Isophthalic acid, butyl 2-methylprop-2-en-1-yl ester	55.5467	C16H20O4	1000343-94-7	128565	276.136
11.1255	Isoquinoline, 1-[3,5-dihydroxybenzyl]-2-formyl-1,2,3,4,5,8-hexahydro-	60.6815	C18H21NO4	1000129-08-0	23867.2	315.147
6.66988	L-(+)-Lactic acid, 2TMS derivative	77.9077	C9H22O3Si2	1000333-99-5	1.33218e+07	234.111
14.5479	L-5-Oxoproline, , 2TMS derivative	80.7535	C11H23NO3Si2	30274-77-2	1.25396e+07	273.122
29.5761	Lactose, 8TMS derivative	53.7461	C36H86O11Si8	42390-78-3	46924.6	918.432
7.45668	L-Alanine, 2TMS derivative	79.052	C9H23NO2Si2	27844-07-1	2.66182e+06	233.127
14.5349	L-Aspartic acid, 3TMS derivative	77.8019	C13H31NO4Si3	55268-53-6	3.96752e+06	349.156
16.0268	L-Glutamic acid, 3TMS derivative	83.1645	C14H33NO4Si3	15985-07-6	4.77064e+06	363.172
31.6151	L-Lysine, N6-acetyl-N2-[N-[N-[N-(N2-acetyl-N,N,N2-trimethyl-L-asparaginyl)-N-methyl-L-phenylalanyl]-N-methyl-L-phenylalanyl]-N,1-dimethyl-L-tryptophyl]-N2,N6-dimethyl-, methyl ester	52.5692	C53H72N8O9	56818-04-3	150696	964.542
30.7121	L-Lysine, N6-acetyl-N2-[N-[N-[N-(N2-acetyl-N,N,N2-trimethyl-L-asparaginyl)-N-methyl-L-phenylalanyl]-N-methyl-L-phenylalanyl]-N,1-dimethyl-L-tryptophyl]-N2,N6-dimethyl-, methyl ester	51.3026	C53H72N8O9	56818-04-3	130978	964.542
34.9962	L-Lysine, N6-acetyl-N2-[N-[N-[N-(N2-acetyl-N,N,N2-trimethyl-L-asparaginyl)-N-methyl-L-phenylalanyl]-N-methyl-L-phenylalanyl]-N,1-dimethyl-L-tryptophyl]-N2,N6-dimethyl-, methyl ester	52.8698	C53H72N8O9	56818-04-3	279436	964.542
6.49302	l-Norvaline, N-(2-methoxyethoxycarbonyl)-, dodecyl ester	62.7464	C21H41NO5	1000328-64-4	149302	387.298
5.75379	l-Norvaline, N-ethoxycarbonyl-, tetradecyl, ester	51.0679	C22H43NO4	1000320-70-9	46868.2	385.319
17.9602	l-Proline, n-heptafluorobutyryl-, butyl ester	65.8459	C13H16F7NO3	1000321-09-9	364382	367.102
15.1082	L-Threonic acid, tris(trimethylsilyl) ether, trimethylsilyl ester	73.418	C16H40O5Si4	1000352-53-3	387995	424.195
12.3874	L-Threonine, 3TMS derivative	79.8573	C13H33NO3Si3	7537-02-02	221586	335.177
14.52	Lycofawcine	51.7184	C18H29NO4	3175-90-4	178432	323.21
14.0383	Malic acid, 3TMS derivative	64.1628	C13H30O5Si3	38166-11-9	219888	350.14
14.5527	Methanone, (2-aminophenyl)(4-chlorophenyl)-	56.4241	C13H10ClNO	2894-51-1	1.98958e+06	231.045
29.1295	methanone, bis(phenylsulfonyl)-, 2-phenylhydrazone	59.8114	C28H20N2O	1000398-95-0	72595.5	400.158
33.627	Methyl 3,4-O-isopropylidene-L-threonate, heptafluorobutyrate	57.2827	C12H13F7O6	1000365-57-3	60651.7	386.06
6.24093	Methyltris(trimethylsiloxy)silane	85.4123	C10H30O3Si4	17928-28-8	937547	310.127
25.5622	Morphinan-14-ol, 6-azido-4,5-epoxy-3-methoxy-17-methyl-, (5.alpha.,6.beta.)-	53.1189	C18H22N4O3	38211-26-6	31570.2	342.169
22.0627	Myo-Inositol, 6TMS derivative	80.8113	C24H60O6Si6	2582-79-8	1.86516e+07	612.301
19.1989	Myristic acid, TMS derivative	69.5368	C17H36O2Si	18603-17-3	373817	300.248
10.4897	N-(2,6-Dimethyl-phenyl)-2-(4-nitro-phenyl)-2-piperidin-1-yl-acetamide	52.1252	C21H25N3O3	1000294-55-6	11809.9	367.19
20.7489	N-(2-Methoxyethyl)-7-thia-9,11-diazatricyclo[6.4.0.0(2,6)]dodeca-1(8),2(6),9,11-tetraen-12-amine	64.1116	C12H15N3OS	1000389-18-3	74894.5	249.094
7.49236	N-(2-Methylbutylidene)isobutylami	63.3296	C9H19N	1000250-00-2	242235	141.152
11.8681	N-(4-Iodophenyl)maleimide	58.8851	C10H6INO2	1000341-21-0	47833.9	298.944
33.2145	N-(9-Anthrylmethylene)aniline	56.2306	C21H15N	796-34-9	50669.9	281.12
22.2315	N,N-Dimethyl-4-(3-oxo-3-thiophen-2-yl-propylamino)-benzamide	56.4894	C16H18N2O2S	1000275-81-9	177017	302.109
10.2283	n-Amyl ether	58.4926	C10H22O	693-65-2	137125	158.167
11.3969	Naphthalene-2,6-dicarboxylic acid, bis-(4-cyanophenyl ester	53.9606	C26H14N2O4	1000192-39-7	97869.4	418.095
5.68764	N-Arachidoyl-5-hydroxytryptamine	50.7499	C30H50N2O2	21249-34-3	66964.7	470.387
20.8135	N-Ethyl-2-amino-octadecan-1,3-diol benzeneboronate	59.294	C26H46BNO2	1000149-10-0	21347.1	415.362
32.5899	N-Isopropyl-2-methyl-5-bemzimidazolecarboxamide	51.0811	C12H15N3O	96330-10-8	93701.3	217.122
7.60692	Nonane, 4,5-dimethyl-	61.644	C11H24	17302-23-7	101595	156.188
7.49747	Nonane, 4,5-dimethyl-	82.7701	C11H24	17302-23-7	432663	156.188
15.7504	N-TFA-2-trifluoromethyltryptamine	52.0188	C13H10F6N2O	1000130-44-7	100267	324.07
8.84307	Octadecane, 6-methyl-	55.3602	C19H40	10544-96-4	89749.2	268.313
22.6083	Octadecanoic acid, 3-hydroxy-2-tetradecyl-, methyl ester, (2R,3R)-	50.2225	C33H66O3	18951-36-5	168451	510.501
23.6659	Oleic Acid, (Z)-, TMS derivative	64.6949	C21H42O2Si	21556-26-3	108041	354.295
23.5846	Oleic Acid, (Z)-, TMS derivative	74.4846	C21H42O2Si	21556-26-3	482825	354.295
14.1269	Oxazole, trimethyl-	57.0951	C6H9NO	20662-84-4	117018	111.068
11.6968	p-[[3-Cyano-4-nitrophenyl]thio]benzoic acid	56.3171	C14H8N2O4S	74761-53-8	469.316	300.02
21.6363	Palmitic Acid, TMS derivative	85.9295	C19H40O2Si	55520-89-3	2.0793e+07	328.28
14.3455	Pentadecanoic acid, TBDMS derivative	52.1379	C21H44O2Si	104255-80-3	93794	356.311
11.4579	Pentanoic acid, 4-(dibenzylamino)-2,2-dimethyl-5-phenyl-3-(p-tosylamino)-, ethyl ester	55.0913	C36H42N2O4S	1000161-37-9	32238.9	598.287
8.60119	Pentasiloxane, dodecamethyl-	58.8022	C12H36O4Si5	141-63-9	1456.06	384.146
33.402	Perethyloctasilsesquiohane	52.193	C16H40O12Si8	18971-70-5	20494.1	648.067
18.7694	Phenanthrene, 9-ethyl-3,6-dimethoxy-10-methyl-	52.3599	C19H20O2	5025-37-6	25792.8	280.146
5.08017	Phenyl-1-hydroxy-2-naphthoate	51.0551	C17H12O3	132-54-7	1744.09	264.079
31.811	Phosphine oxide, diphenylpropenyl-	53.1567	C15H15OP	4252-89-5	58602.9	242.086
26.2164	Phosphine, [2-(6-methyl-2-pyridyl)ethyl](phenyl)-[3-(di-t-butylphosphino)propyl]-	63.3398	C25H39NP2	1000163-56-9	1.09014e+06	415.256
8.80075	Phosphoric acid, bis(trimethylsilyl)monomethyl ester	76.4033	C7H21O4PSi2	18291-81-1	713086	256.072
17.98	Phosphorimidic acid, N-methoxy-, 4-oxo-2,3-bis[(trimethylsilyl)oxy]butyl bis(trimethylsilyl) ester, [R-(R*,R*)]-	55.5406	C17H44NO7PSi4	55517-61-8	108633	517.193
18.2576	Phosphorylethanolamine, 4TMS derivative	72.782	C14H40NO4PSi4	55334-92-4	1.76917e+06	429.177
14.6705	Phthalic acid, heptyl 2,4,5-trifluorobenzyl ester	52.6313	C22H23F3O4	1000415-49-7	309130	408.155
22.8975	Pregn-16-en-20-one, 11,18-bis(acetyloxy)-3,9-epoxy-3-methoxy-, (3.alpha.,5.beta.,11.alpha.)-	50.3915	C26H36O7	30384-39-5	108091	460.246
8.134	Propionic acid, 3-[(adamantane-1-carbonyl)amino]-3-(4-ethoxyphenyl)-, ethyl ester	54.3896	C24H33NO4	1000305-70-4	279810	399.241
32.7846	p-Toluic acid, morpholide	55.3236	C12H15NO2	1000306-95-4	460490	205.11
35.3182	Pyrazolidinetrione, phenyl-, 4-(phenylhydrazone)	61.7698	C15H12N4O2	21272-26-4	63462.9	280.096
24.832	Pyrazolo[5,1-c][1,2,4]benzotriazin-8-ol, acetate (ester)	53.626	C11H8N4O2	16150-81-5	1.11367e+06	228.065
28.9768	Pyridine, 2-methyl-3,4,5,6-tetraphenyl-	56.52	C30H23N	41728-97-6	203688	397.183
22.7774	pyrido[1,2-a]indole-7-carbonitrile, 6,10-dihydro-8-(4-methoxyphenyl)-10,10-dimethyl-6-oxo-	52.1514	C22H18N2O2	1000398-23-2	4.81377e+06	342.137
19.1009	Pyrido[2,3-b]pyrimido[4,5-d]thiophen-4(3H)-one, 2,7,8,9-tetramethyl-	63.3321	C13H13N3OS	327097-50-7	442754	259.078
22.0355	Pyrido[2,3-b]quinolin-5-one, 7-chloro-5,10-dihydro-2-phenyl-	55.8399	C18H11ClN2O	69750-07-8	12005.4	306.056
6.96218	Pyrido[3,4-d]pyrimidine-2,4(1H,3H)-dione, 3,6,8-trimethyl-	51.7917	C10H11N3O2	22389-80-6	1078.95	205.085
34.0418	Pyrimido[1,6-a]indole, 1,2,3,4-tetrahydro-5,7-dimethyl-	51.6538	C13H16N2	38349-07-4	26955.4	200.131
14.3125	Pyroglutamic acid, TMS derivative	57.2157	C8H15NO3Si	1000333-17-1	339221	201.082
10.4334	Pyrrole-3,4-dicarbonitrile, 2-ethoxymethylidenamino-	54.7066	C9H8N4O	166105-75-5	10550.7	188.07
25.1683	Quinoxalin-2-amine	50.0446	C8H7N3	5424-05-05	159547	145.064
21.3143	Scyllo-Inositol, 6TMS derivative	68.9485	C24H60O6Si6	14251-18-4	325870	612.301
15.0584	Selenocyanic acid, (3-cyanobenzo[b]selenophene-2-yl)methyl ester	58.901	C11H6N2Se2	39828-50-7	5173.61	325.886
11.9724	Serine, 3TMS derivative	77.7431	C12H31NO3Si3	64625-17-8	817404	321.161
29.1898	Silane, (3-chlorophenyloxy)dimethyltetradecyloxy-	50.2651	C22H39ClO2Si	1000346-88-6	34159.5	398.241
16.9026	Silane, 1,3,5-benzenetriyltris[trimethyl-	59.7501	C15H30Si3	5624-60-2	120403	294.166
8.53692	Silane, cyclohexyldimethoxymethyl-	87.5947	C9H20O2Si	17865-32-6	1.11523e+06	188.123
10.4478	Silane, diethyldecyloxy(2-methylbutoxy)-	56.3012	C19H42O2Si	1000363-10-3	1.26267e+06	330.295
33.1824	Silane, diethyldecyloxynonyloxy-	53.4717	C23H50O2Si	1000363-09-1	64648.3	386.358
23.1525	Silane, diethyldodecyloxypentyloxy-	58.4042	C21H46O2Si	1000363-03-9	58108.6	358.327
29.1577	Silane, diethylheptadecyloxy(2-methylbutoxy)-	71.4668	C26H56O2Si	1000363-10-8	131290	428.405
10.4652	Silane, diethylheptyloxyoctyloxy-	78.1617	C19H42O2Si	1000363-07-7	27221.9	330.295
13.9369	Silane, diethylhexadecyloxy(1-phenylpropoxy)-	64.5531	C29H54O2Si	1000363-27-7	29311.1	462.389
22.0723	Silane, diethylhexadecyloxy(1-phenylpropoxy)-	62.0668	C29H54O2Si	1000363-27-7	148008	462.389
27.3534	Silane, diethylhexadecyloxy(2-methoxyethoxy)-	55.8012	C23H50O3Si	1000363-54-5	166732	402.353
33.9373	Silane, diethylhexadecyloxyneopentyloxy-	50.8254	C25H54O2Si	1000363-94-8	56541.2	414.389
21.4122	Silane, diethylhexyloxyoctyloxy-	62.5621	C18H40O2Si	1000363-07-6	6993.44	316.28
31.9767	Silane, diethylpentadecyloxy(pentafluorobenzyloxy)-	55.5445	C26H43F5O2Si	1000363-23-0	10042	510.295
24.8605	Silane, dimethyl(3-ethylphenoxy)docosyloxy-	53.2684	C32H60O2Si	1000347-47-3	62561.2	504.436
26.5298	Silane, dimethyl(docosyloxy)undecyloxy-	61.1624	C35H74O2Si	1000347-86-9	10270.5	554.546
20.4501	Silane, methylvinyl(dodecyloxy)propoxy-	56.0864	C18H38O2Si	1000416-87-9	38590.9	314.264
16.5601	Silanetriamine, 1-azido-N,N,N',N',N'',N''-hexamethyl-	55.4435	C6H18N6Si	5599-36-0	3.30866e+06	202.136
10.4533	Silanol, trimethyl-, phosphate (3:1)	82.3563	C9H27O4PSi3	10497-05-9	1.04529e+07	314.095
27.0268	Sotalol methylboronate	55.4082	C13H21BN2O3S	127202-09-9	117261	296.137
24.2175	Stearic acid, TBDMS derivative	51.8666	C24H50O2Si	87020-51-7	115828	398.358
23.8721	Stearic acid, TMS derivative	85.9264	C21H44O2Si	18748-91-9	1.48957e+07	356.311
34.5758	Stigmast-5-ene, 3.beta.-(trimethylsiloxy)-, (24S)-	52.0951	C32H58OSi	25873-56-7	48332.8	486.426
23.4452	Succinic acid, 2,2,3,3,4,4,5,5-octafluoropentyl 2-chlorophenyl ester	50.6273	C15H11ClF8O4	1000389-79-4	64648.3	442.022
15.8781	Succinic acid, di(2-(2-chlorophenoxy)ethyl) ester	55.5764	C20H20Cl2O6	1000381-54-5	49910.4	426.064
12.7191	Sulazepam	56.1554	C16H13ClN2S	2898-13-7	83022	300.049
10.8099	Sulazepam	59.3071	C16H13ClN2S	2898-13-7	215062	300.049
6.78794	Sulfurous acid, 2-ethylhexyl nonyl ester	81.3487	C17H36O3S	1000309-19-2	621641	320.239
24.296	Terephthalic acid, piperidide, heptyl ester	58.1712	C20H29NO3	1000323-89-3	22608	331.215
34.6954	tert-Butyldimethylsilyl 3-methyl-4-((2,2,3,3,3-pentafluoropropanoyl)oxy)benzoate	52.7386	C17H21F5O4Si	1000385-89-9	168451	412.113
26.205	Tetracosamethyl-cyclododecasiloxane	50.3645	C24H72O12Si12	18919-94-3	1.03961e+06	888.226
23.4178	Tetracosamethyl-cyclododecasiloxane	72.702	C24H72O12Si12	18919-94-3	473648	888.226
17.2343	Tetracosane	76.6301	C24H50	646-31-1	738388	338.391
6.57424	Tetrasiloxane, decamethyl-	56.9663	C10H30O3Si4	141-62-8	214433	310.127
10.6783	Thiazole, 2-(phenylthio)-	64.1552	C9H7NS2	33342-67-5	39681.5	193.002
32.8322	Thiophene-3-sulfonamide, 2,5-dimethyl-N-(4-dimethylaminophenyl)-	58.5706	C14H18N2O2S2	1000302-66-9	144422	310.081
6.00534	Trichloroethanol, TMS derivative	64.2527	C5H11Cl3OSi	41262-38-8	215009	219.964
11.3428	Trisiloxane, octamethyl-	74.9116	C8H24O2Si3	107-51-7	1.73407e+06	236.108
14.3708	Tromethamine, 4TMS derivative	59.2398	C16H43NO3Si4	136281-54-4	76582.7	409.232
9.53429	Undecane, 2,6-dimethyl-	68.6864	C13H28	17301-23-4	256068	184.219
8.66343	Undecane, 2-methyl-	76.6994	C12H26	7045-71-8	74077.3	170.203
6.68469	Undecane, 5,7-dimethyl-	84.802	C13H28	17312-83-3	2.01449e+06	184.219
11.6063	Uracil, 2TMS derivative	62.6	C10H20N2O2Si2	10457-14-4	54691.7	256.106
10.0624	Urea, 2TMS derivative	65.1335	C7H20N2OSi2	18297-63-7	1.58757e+06	204.111
10.8355	Valine, N-methyl-N-ethoxycarbonyl-, undecyl ester	52.4645	C20H39NO4	1000328-84-4	141043	357.288

## Sheet: Supplementary table 3
Retention Time (RT)	Metabolites	% similarity	Molecular Formula	CAS Number	Peak Area	Molecular Weight (MW)
14.48	(1H-Benzoimidazol-2-yl)-(1,3-dioxo-indan-2-ylidene)-acetonitrile	53.3272	C18H9N3O2	1000294-65-2	37783.8	299.069
24.2861	(2,5-Dimethyl-1-p-tolyl-3-ylmethylene)-(4-acetylphenyl)amine	50.4552	C22H22N2O	1000306-74-4	74222	330.173
8.97818	(4,4-Dimethyl-5-methylene-4,5-dihydro-3H-pyrrol-2-yl)-(4,4-dimethyl-5-methylene-pyrrolidin-2-ylidene)-acetonitrile	57.4081	C16H21N3	1000192-22-5	9196.93	255.174
8.80935	.beta.-Alanine, N-(4-ethylbenzoyl)-, undecyl ester	58.2042	C23H37NO3	1000321-65-9	60064	375.277
34.5503	.beta.-Sitosterol, TMS derivative	51.8778	C32H58OSi	2625-46-9	180315	486.426
7.72253	{6-Phenylimidazo[2,1-b][1,3]thiazol-3-yl}acetic acid	59.8933	C13H10N2O2S	68347-91-1	123505	258.046
9.88251	1(3H)-Isobenzofuranone, 3,3-dimethyl-	56.8135	C10H10O2	1689-09-4	29342.1	162.068
32.4476	1-(3-Methylbutyl)-2,3,5-trimethylbenzene	51.5235	C14H22	107997-60-4	4.59395e+07	190.172
9.04513	1-(4-Fluorophenyl)-3-phenyl-2-pyrazoline	59.7214	C15H13FN2	18836-24-3	29517	240.106
19.5466	1,1'-Biphenyl, 4,2',3',4'-tetramethoxy-6-methyl-	57.3427	C17H20O4	119101-15-4	60803	288.136
19.2037	1,1'-Biphenyl-2,4-dicarbonitrile, 3-amino-5-(2-furyl)-	50.7076	C18H11N3O	77198-57-3	112471	285.09
10.7885	1,2-Dimethoxy-4-(1,2,3-trimethoxypropyl)benzene	70.8327	C14H22O5	1000313-34-7	1.27082e+06	270.147
32.02	1,2-Dipalmitin, TMS derivative	53.8982	C38H76O5Si	53212-93-4	18364.1	640.546
33.7641	1,3-Benzenediol, o-hexanoyl-	52.8121	C12H16O3	1000330-68-5	254805	208.11
12.6783	1,3-dioxane-5,5-dimethanol, 2-hexyl-	52.0366	C12H24O4	1000396-39-5	86489.4	232.167
25.5523	1,3-Diphenyl-2-azafluorene	51.3448	C24H17N	57162-74-0	113823	319.136
31.9619	1,5-Naphthyridin-4-amine	60.6705	C8H7N3	27392-68-3	162916	145.064
35.2715	10-(p-Tolylazo)-9-phenanthrenamine	54.3611	C21H17N3	1240-12-6	48903	311.142
19.075	11-Methyltricosane	54.349	C24H50	27538-41-6	44195.4	338.391
33.8047	16-Methyl-heptadecane-1,2-diol, isopropylidene derivative	51.9102	C21H42O2	1000336-66-9	159407	326.318
8.15835	1-Butanamine, 3-methyl-	53.7447	C5H13N	107-85-7	98450.9	87.105
15.5678	1-Cyano-4-diphenyl(tert-butyl)silyloxybenzene	56.7301	C23H23NOSi	1000307-86-7	1497.64	357.155
15.3875	1H-1-Pyrindine-2,7-dione, 1-[2-(1,3-benzodioxol-5-yl)ethyl]-3,4,5,6-tetrahydro-	54.6812	C17H17NO4	114942-65-3	37250.6	299.116
22.0383	1H-Benzimidazole, 1-(2-phenylethenyl)-, (E)-	50.1285	C15H12N2	51644-24-7	51429.3	220.1
22.2691	1H-Benzimidazole, 5-isocyanato-2-(4-thiazolyl)-1-(trimethylsilyl)-	50.6675	C14H14N4OSSi	55090-56-7	20963.3	314.066
12.6856	1-Hexadecanol, TBDMS derivative	57.0288	C22H48OSi	76358-80-0	220513	356.347
20.2437	1-Hexadecanol, TBDMS derivative	52.2537	C22H48OSi	76358-80-0	58206.6	356.347
26.5431	1H-Indol-2-one, 2,3-dihydro-1-acetyl-3-(5-methylthio-2-furfurylidene)-	54.2412	C16H13NO3S	64259-23-0	68425.2	299.062
24.2384	1H-Indole-2-carboxylic acid, 6-(4-ethoxyphenyl)-3-methyl-4-oxo-4,5,6,7-tetrahydro-, isobutyl ester	52.8103	C22H27NO4	1000316-17-3	337126	369.194
22.0465	1H-Indole-3-carboxylic acid, 5-hydroxy-2-methyl-1-[2-(4-propylphenoxy)ethyl]-, methyl ester	50.206	C22H25NO4	1000337-74-4	188058	367.178
16.7237	1H-Pyrrole-2,5-dione, 1-(4-fluorophenyl)dihydro-3-[4-[2-(2-thienyl)ethyl]-1-piperazinyl]-	58.9966	C20H22FN3O2S	1000362-36-2	42181.6	387.142
27.336	1-Monopalmitin, 2TMS derivative	83.0125	C25H54O4Si2	1188-74-5	6.8017e+06	474.356
6.04191	1-Propanamine, N,2-dimethyl-	64.9379	C5H13N	625-43-4	273271	87.105
8.32436	1-Propene, 3,3'-oxybis[2-chloro-	54.7774	C6H8Cl2O	4162-62-3	20823.4	165.995
7.08319	1R,2c,3t,4t-Tetramethyl-cyclohexane	54.2183	C10H20	1000144-07-3	39065.8	140.157
20.1734	2(1H)-Pyrimidinone, 1-(2-deoxy-.beta.-D-erythro-pentofuranosyl)-4-methoxy-5-methyl-	55.5017	C11H16N2O5	50591-13-4	77487.1	256.106
24.154	2-(4-Methoxy-phenoxy)-6-methyl-4-phenyl-quinazoline	62.9135	C22H18N2O2	1000317-86-4	112337	342.137
11.9792	2,1-benzisoxazole-5,7-dicarboxylic acid, 1,3-dihydro-3-oxo-	54.0406	C9H5NO6	1000400-84-9	70132	223.012
10.4191	2,3,4-Trifluorobenzoic acid, 3,4-dimethylphenyl ester	51.8642	C15H11F3O2	1000331-19-6	475.791	280.071
16.3303	2,3:8,9-Bis(methylendioxy)-5,5a,6,7-tetrahydro-6-methylbenz[e]indeno[2,1-b]azepine	57.4711	C20H17NO4	88151-43-3	20376.2	335.116
27.3255	2,3-Di(methylthio)dodecanol	59.132	C14H30OS2	1000281-32-0	314130	278.174
33.0537	2,3-Dicyanodibenzo(f,h)quinoxaline	51.0329	C18H8N4	55408-49-6	78014.3	280.075
28.5854	2,3-Dimethyl-5-oxo-1-phenyl-4-(4-quinolyl)-3-pyrazoline	57.5991	C20H17N3O	18250-46-9	157593	315.137
34.6841	2,4-Dihydroxypropiophenone, 2TMS derivative	52.6323	C15H26O3Si2	55724-93-1	130375	310.142
22.0313	2,4-Dimethyl-12-thia-1,5,6a,11-tetraaza-indeno[2,1-a]fluorene	50.5316	C17H12N4S	1000277-68-7	5133.94	304.078
10.3917	2,4-Dimethyldodecane	71.0238	C14H30	6117-99-3	354221	198.235
27.4303	2,4-Diphenyl-11H-pyrimido[4,5-b]benzo[e]indole	67.5238	C26H17N3	66156-56-7	127576	371.142
27.4522	2,4-Diphenyl-11H-pyrimido[4,5-b]benzo[e]indole	66.4799	C26H17N3	66156-56-7	109130	371.142
21.4161	2,4-di-tert-butylphenol, trifluoroacetate ester	53.336	C16H21F3O2	1000376-42-1	4606.61	302.149
13.9214	2,5-Cyclohexadien-1-one, 4,4'-(1,2-ethanediylidene)bis[2,6-bis(1,1-dimethylethyl)-	60.3916	C30H42O2	809-73-4	27244.9	434.318
32.6764	2,5-Furandicarboxylic acid	52.2658	C6H4O5	3238-40-2	82554.8	156.006
21.6508	2,5-Hexanedione, 3,4-bis[3-hydroxy-3-methyl-2-(1-methylethyl)-1-butenylidene]-	50.6804	C22H34O4	69651-45-2	35407.6	362.246
7.48667	2,6-Pyridinedicarboxaldehyde, 4-hydroxy-, bis[methyl(2-pyridyl)hydrazone]	52.6482	C19H19N7O	118252-02-1	39438.2	361.165
11.1148	2,6-Pyridinedicarboxylic acid, 2-methylphenyl pentyl ester	55.0888	C19H21NO4	1000369-12-2	35686.5	327.147
11.4712	2,7-Naphthalenediol, 1,8-di-2-propenyl-, diacetate	52.4584	C20H20O4	68873-18-7	6147.34	324.136
13.5056	2,9-Dimethyl-5-carboxy-1,10-phenanthroline	58.2692	C15H12N2O2	1000252-33-3	74404.2	252.09
5.96181	2-Butene ozonide	59.2691	C4H8O3	765-57-1	124250	104.047
7.86823	2-Butene-1,4-diol, 2TMS derivative	63.0365	C10H24O2Si2	1000352-69-3	18382.8	232.131
11.8582	2-Butenedioic acid, (E)-, 2TMS derivative	67.0863	C10H20O4Si2	17962-03-7	145141	260.09
27.3846	2-Cyclohexen-3,6-diol-1-one, 2-[11-phenundecanoyl]-	54.6912	C23H32O4	140614-61-5	81912.3	372.23
20.6086	2-Ethylthio-2,3-dimethylbutane	50.0488	C8H18S	1000314-01-4	71881.5	146.113
14.5793	2-Fluoro-6-trifluoromethylbenzamide, N-(4-fluorophenyl)-	55.7538	C14H8F5NO	1000358-11-3	86479.5	301.053
28.0306	2H-1-Benzopyran-2-one, 4,5,7-trimethoxy-3-(4-methoxyphenyl)-	61.441	C19H18O6	4222-04-02	178478	342.11
32.6314	2-Hexanone, 5-methyl-5-nitro-	54.9134	C7H13NO3	4604-49-3	121805	159.09
28.7949	2-Monostearin, 2TMS derivative	76.233	C27H58O4Si2	53336-13-3	996276	502.387
12.8767	2-Myristynoyl pantetheine	50.4632	C25H44N2O5S	1000111-63-6	157618	484.297
27.7295	2-naphthalenecarboxamide, N-butyl-4-(hexadecyloxy)-1-hydroxy-	50.0229	C31H49NO3	1000399-55-1	80895.3	483.371
27.017	2-Palmitoylglycerol, 2TMS derivative	80.4205	C25H54O4Si2	53212-97-8	1.90111e+06	474.356
6.0348	2-Propenoic acid, 2-methyl-	68.3051	C4H6O2	79-41-4	137472	86.037
28.9647	2-propenoic acid, 3-[4-[bis(4-methylphenyl)amino]phenyl]-2-cyano-, ethyl ester	53.1278	C26H24N2O2	1000398-91-1	34864.1	396.184
28.9723	2-propenoic acid, 3-[4-[bis(4-methylphenyl)amino]phenyl]-2-cyano-, ethyl ester	62.1697	C26H24N2O2	1000398-91-1	74768.7	396.184
25.2251	2-Pyrrolidinone	54.3754	C4H7NO	616-45-5	139434	85.053
5.92238	3-(1-Hydroxy-1-methylethyl)benzonitrile	62.0974	C10H11NO	1000191-77-2	387231	161.084
10.6865	3,5-Bis(trifluoromethyl)benzylamine, N-trimethylsilyl-	56.9969	C12H15F6NSi	1000417-58-9	232666	315.088
9.1435	3,5-Dimethyl-1-dimethylphenylsilyloxybenzene	64.0213	C16H20OSi	1000307-90-6	5480.64	256.128
17.2472	3,5-Dinitrobenzoic acid, tetrahydrofuran-2-on-5-ylmethyl ester	62.4149	C12H10N2O8	1000196-41-3	171614	310.044
14.8464	3,5-di-tert-Butyl-4-hydroxyphenylpropionic acid	77.2794	C17H26O3	20170-32-5	7.3239e+06	278.188
14.2642	3,7-dioxa-2,8-disilanonane, 2,2,8,8-tetramethyl-5,5-bis[[(trimethylsilyl)oxy]methyl]-	73.9897	C17H44O4Si4	1000402-79-1	481408	424.232
35.6502	3,9-Epoxypregnan-14-ol, 3-methoxy-11,18,20-triacetoxy-	50.9406	C28H42O9	30344-51-5	110092	522.283
7.94271	3-Aminopropanol, 2TBDMS derivative	60.8728	C15H37NOSi2	1000333-00-9	268972	303.241
8.03864	3H-naphtho[1,2,3-de]quinoline-2,7-dione, 1-amino-6-bromo-3-methyl-	54.5642	C17H11BrN2O2	1000402-54-9	802.425	354
35.4163	3-Iodo-thieno(2,3-b)quinoline	50.758	C11H6INS	75703-75-2	48752.2	310.927
7.06673	3-Methyl-4-(1-pyrrolidinyl)pyrido[3,2-c]pyridazine	53.1348	C12H14N4	1000326-91-5	45764.5	214.122
5.27543	3-Methyl-4-amino-1,2,4-triazole-5-thiol	66.477	C3H6N4S	20939-15-5	788200	130.031
6.28214	3-Pyridinol, TBDMS derivative	63.7393	C11H19NOSi	1000373-13-3	140153	209.124
12.7776	4-(2,2'-Bithiophen-5-yl)but-3-yn-1-ol	51.4945	C12H10OS2	1137-87-7	479753	234.017
11.2018	4-(Acridin-9-yl)-1,3-benzenediamine	66.4602	C19H15N3	1000326-84-9	121487	285.127
7.31615	4-(Benzoylmethyl)-6-methyl-2H-1,4-benzoxazin-3-one	59.4541	C17H15NO3	105492-53-3	3547.59	281.105
19.2913	4-(Morpholin-4-yl)-6-(2-phenylethynyl)-2,1,3-benzoxadiazole	50.4453	C18H15N3O2	1000387-57-0	101546	305.116
23.5564	4,4'-Sulfonyldiphthalic dianhydride	51.6766	C16H6O8S	2540-99-0	6.84167e+06	357.978
15.1617	4,6-Difluoro-2-phenylaminopyrimidine	50.9269	C10H7F2N3	1000070-51-8	635.074	207.061
15.2624	4-Cyano-1-diphenylmethylsilyloxybenzene	50.541	C20H17NOSi	1000307-87-6	543.225	315.108
23.8511	4H-1-Benzopyran-2-carboxylic acid, 8-bromo-7-hydroxy-4-oxo-, ethyl ester	60.3476	C12H9BrO5	30113-86-1	47445.7	311.963
23.8977	4H-1-Benzopyran-4-one, 3-(3,4-dimethoxyphenyl)-6,7-dimethoxy-	56.1579	C19H18O6	24126-93-0	112733	342.11
32.5172	4H-1-Benzopyran-4-one, 7-hydroxy-2,5-dimethyl-	51.4515	C11H10O3	38412-47-4	146438	190.063
28.1104	4H-Cyclopropa[5',6']benz[1',2':7,8]azuleno[5,6-b]oxiren-4-one, 8,8a-bis(acetyloxy)-2a-[(acetyloxy)methyl]-1,1a,1b,1c,2a,3,3a,6a,6b,7,8,8a-dodecahydro-6b-hydroxy-3a-methoxy-1,1,5,7-tetramethyl-, [1aR-(1a.alpha.,1b.beta.,1c.alpha.,2a.alpha.,3a.alpha.,6a.alpha.,6b.alpha.,7.alpha.,8.beta.,8a.alpha.)]-	52.0451	C27H36O10	64869-55-2	159508	520.231
27.9075	4H-Cyclopropa[5',6']benz[1',2':7,8]azuleno[5,6-b]oxiren-4-one, 8,8a-bis(acetyloxy)-2a-[(acetyloxy)methyl]-1,1a,1b,1c,2a,3,3a,6a,6b,7,8,8a-dodecahydro-6b-hydroxy-3a-methoxy-1,1,5,7-tetramethyl-, [1aR-(1a.alpha.,1b.beta.,1c.alpha.,2a.alpha.,3a.alpha.,6a.alpha.,6b.alpha.,7.alpha.,8.beta.,8a.alpha.)]-	52.5625	C27H36O10	64869-55-2	83134.8	520.231
29.1973	4-Hydroxyanthraquinone-2-carboxylic acid, di-TMS	61.717	C21H24O5Si2	1000103-01-3	267526	412.116
10.5826	4-Methylamino-5-amino-fluorene	50.8362	C14H14N2	122779-24-2	50612.9	210.116
28.61	4-Methylthio-N-phenyl-1,2-carbazoledicarboximide	50.32	C21H14N2O2S	22359-21-3	619193	358.078
16.0119	4-Quinolinol, 4-ethenyldecahydro-1,2-dimethyl-, (2.alpha.,4.beta.,4a.alpha.,8a.beta.)-	53.9906	C13H23NO	20431-95-2	52360.6	209.178
19.5718	5-(1-Naphthyloxymethyl)-3-phenyl-2-oxazolidone	50.9091	C20H17NO3	5255-99-2	56023.7	319.121
32.5895	5,7-Dihydroxy-3-[2,3-dihydro-4-hydroxy-2-(2-hydroxyisopropyl)benzofuran-7-yl]chromone	61.4952	C20H18O7	99347-41-8	454789	370.105
32.6838	5,7-Dihydroxy-3-[2,3-dihydro-4-hydroxy-2-(2-hydroxyisopropyl)benzofuran-7-yl]chromone	62.1819	C20H18O7	99347-41-8	3.4552e+06	370.105
32.8187	5,7-Dihydroxy-3-[2,3-dihydro-4-hydroxy-2-(2-hydroxyisopropyl)benzofuran-7-yl]chromone	66.7448	C20H18O7	99347-41-8	286601	370.105
29.0975	5-Amino-2-(4-hexyloxyphenyl)pyrimidine	56.8395	C16H21N3O	84610-00-4	250239	271.168
11.3799	5-Aminoisophthalic acid	50.7994	C8H7NO4	99-31-0	5620.53	181.038
5.61406	5-Benzofuranmethanamine, 2,3-dihydro-2-methyl-N-propyl-	56.5211	C13H19NO	1000351-55-3	98379.7	205.147
13.7254	5-Benzofuranpropanol, 2-(1,3-benzodioxol-5-yl)-7-methoxy-	50.213	C19H18O5	530-22-3	96170.1	326.115
24.8154	5-Butyl-5-ethylpentadecane	58.0917	C21H44	1000360-42-8	389898	296.344
10.529	5-Furan-2-yl-2H-pyrazole-3-carboxylic acid, hydrazide	51.7914	C8H8N4O2	1000303-42-6	188706	192.065
26.811	5H-Cyclopropa[3,4]benz[1,2-e]azulen-5-one, 9,9a-bis(acetyloxy)-3-[(acetyloxy)methyl]-2-chloro-1,1a,1b,2,3,4,4a,7a,7b,8,9,9a-dodecahydro-3,4a,7b-trihydroxy-1,1,6,8-tetramethyl-, [1aR-(1a.alpha.,1b.beta.,2.alpha.,3.alpha.,4a.beta.,7a.alpha.,7b.alpha.,8.alpha.,9.beta.,9a.alpha.)]-	53.4593	C26H35ClO10	77573-33-2	155342	542.192
8.46791	5H-Pyrazolo[3,4-b]quinolin-3-amine, 6,7,8,9-tetrahydro-	50.9299	C10H12N4	1000362-40-8	39592.6	188.106
24.8153	5-Methyl-2-(2-methyl-2-tetrahydrofuryl)tetrahydrofuran	54.6334	C10H18O2	1000112-56-4	224277	170.131
14.4412	5-Oxazolidinone, 2-(1-methylethyl)-3-(2-naphthalenecarbonyl)-, (.+-.)	50.8894	C17H17NO3	119215-58-6	23472.4	283.121
33.7889	6-(4-Fluoro-phenyl)-benzo[4,5]imidazo[1,2-c]quinazoline	57.7029	C20H12FN3	70371-91-4	72843.9	313.102
10.4355	6-Chloro-3-nitro-4-phenyl-quinolin-2-ol	57.0125	C15H9ClN2O3	284663-83-8	167541	300.03
21.751	6H-Dibenzo(b,d)pyran-1-ol, 3-hexyl-7,8,9,10-tetrahydro-6,6,9-trimethyl-	60.5836	C22H32O2	117-51-1	231909	328.24
33.3869	6H-Dibenzo[a,g]quinolizine, 5,8,13,13a-tetrahydro-2,3-dimethoxy-, (.+/-.)-	50.895	C19H21NO2	47206-72-4	65250.4	295.157
10.776	6-Hydrazino-2,4-dimethyl-5,7-diazabenzofuran	50.8815	C8H10N4O	120455-71-2	243681	178.085
10.7208	6-Methyl-2,5-diphenyl-6,7-dihydropyrazolo[1,5-c]pyrimidin-7-one	55.2291	C19H15N3O	110950-94-2	143565	301.122
14.2887	6-Thiopyrazolo[3,4-d]pyrimidin-4,6(5H,7H)-dione-3-carboxamide	59.0142	C6H5N5O2S	96555-42-9	81012.7	211.016
19.5635	7,7-Dimethyl-3,6,8,11-tetraoxa-7-silatridecane	52.4713	C10H24O4Si	1000375-89-2	84915	236.144
27.5847	7aH-Cyclopenta[a]cyclopropa[f]cycloundecene-2,4,7,7a,10,11-hexol, 1,1a,2,3,4,4a,5,6,7,10,11,11a-dodecahydro-1,1,3,6,9-pentamethyl-, 2,4,7,10,11-pentaacetate	52.9325	C30H44O11	51906-08-2	222769	580.288
27.2535	7aH-Cyclopenta[a]cyclopropa[f]cycloundecene-2,4,7,7a,10,11-hexol, 1,1a,2,3,4,4a,5,6,7,10,11,11a-dodecahydro-1,1,3,6,9-pentamethyl-, 2,4,7,10,11-pentaacetate	53.8615	C30H44O11	51906-08-2	135486	580.288
26.3166	7aH-Cyclopenta[a]cyclopropa[f]cycloundecene-2,4,7,7a,10,11-hexol, 1,1a,2,3,4,4a,5,6,7,10,11,11a-dodecahydro-1,1,3,6,9-pentamethyl-, 2,4,7,10,11-pentaacetate	50.0807	C30H44O11	51906-08-2	159660	580.288
23.5094	9,12-Octadecadienoic acid (Z,Z)-, TMS derivative	68.4094	C21H40O2Si	56259-07-5	244646	352.28
6.3868	9-Decylanthracene	54.2889	C24H30	76881-11-3	82012	318.235
23.6659	9-Octadecenoic acid, (E)-, TMS derivative	65.0569	C21H42O2Si	96851-47-7	339755	354.295
5.38275	9-Phenanthrenemethyl 2,6-dimethylbenzoate	53.9256	C24H20O2	92174-46-4	96612.3	340.146
15.4741	Acetamide, 2-[[4-methyl-5-(4-morpholinylmethyl)-4H-1,2,4-triazol-3-yl]thio]-	57.3627	C10H17N5O2S	1000316-38-6	971633	271.11
12.5235	Acetamide, N-(4-fluorophenyl)-2-(3-oxo-2,3-dihydrobenzo[1,4]oxazin-4-yl)-	55.7187	C16H13FN2O3	1000316-91-1	19130.2	300.091
16.1557	Acetic acid, 2-(9-phenylimino-10-acridanyl)-, ethyl ester	52.0438	C23H20N2O2	1000286-04-7	61881.5	356.152
11.5828	Acridine, 9-methyl-	52.5007	C14H11N	611-64-3	61796.2	193.089
33.7483	Adipic acid, 2,4-dimethylpent-3-yl tridecyl ester	53.8597	C26H50O4	1000353-53-0	1.0416e+06	426.371
24.2867	Aflatoxin G2	51.5135	C17H14O7	7241-98-7	80376.5	330.074
23.558	Alanine, N-methyl-N-ethoxycarbonyl-, isobutyl ester	51.5014	C11H21NO4	1000329-28-5	775182	231.147
13.7396	Aminomalonic acid, tris(trimethylsilyl)-	69.4067	C12H29NO4Si3	1000079-52-5	758357	335.14
20.9403	Androst-4-en-9-methylthio-19-ol-3,11,17-trione	50.36	C20H26O4S	1000128-15-6	7063.15	362.155
20.7443	anthracene, 2,7-dimethyl-	50.6295	C16H14	1000400-52-2	76174.8	206.11
25.1873	Arachidonic acid, TMS derivative	74.6807	C23H40O2Si	113516-18-0	289310	376.28
11.9166	Azelaic acid, 2TBDMS derivative	70.7069	C21H44O4Si2	104255-97-2	119651	416.278
15.2428	Benzaldehyde, 3-ethoxy-4-(3-nitrobenzyloxy)-	52.2999	C16H15NO5	1000276-70-3	849.918	301.095
10.8054	Benzaldehyde, 3-ethoxy-4-(3-nitrobenzyloxy)-	61.3667	C16H15NO5	1000276-70-3	192999	301.095
35.1422	Benzenamine, 4-trifluoromethoxy-N-(4-methylthiobenzylidene)-	61.5041	C15H12F3NOS	304454-85-1	201171	311.059
11.2676	benzenamine, N,N-dimethyl-4-(1H-naphtho[2,1-b]pyran-3-yl)-	53.773	C21H19NO	1000397-53-6	42571.6	301.147
32.8246	benzenamine, N-[4-[[4-[bis(4-methylphenyl)amino]phenyl]methyl]phenyl]-3-methyl-N-(4-methylphenyl)-	60.4171	C41H38N2	1000399-81-0	77781	558.303
26.4373	benzene, 1,1'-methylenebis[3-(1,1-dimethylethyl)-5-methyl-4-[(trimethylsilyl)oxy]-	64.6552	C29H48O2Si2	1000399-56-2	933563	484.319
19.7255	Benzene, iodo-	53.3222	C6H5I	591-50-4	24371.7	203.944
32.6135	Benzenemethanamine, .alpha.-(2-imino-1-methyl-2-phenylethylidene)-N-phenyl-	52.1531	C22H20N2	71115-28-1	159086	312.163
7.72533	Benzimidazole, 5-iodo-2-methyl-	57.0742	C8H7IN2	2818-70-4	103143	257.965
19.1015	Benzo[1,2-b:5,4-b']bisbenzofuran	62.5225	C18H10O2	241-36-1	511488	258.068
10.8724	Benzoic acid, 2-(2-methylbutyl)amino-, methyl ester	51.9897	C13H19NO2	1000375-34-7	55212.7	221.142
12.7678	Benzoic acid, 4-[(2,4-dimethoxy-6-pentylbenzoyl)oxy]-2-methoxy-6-pentyl-, methyl ester	57.0239	C28H38O7	5366-08-05	88194.5	486.262
11.6281	Benzonitrile, 2-benzylthio-4-methoxy-	51.9082	C15H13NOS	1000277-13-1	47231	255.072
35.0568	Benzothiophene-3-carbonitrole, 4,5,6,7-tetrahydro-2-(4-acetoxy-3-methoxybenzylidenamino)-	51.7186	C19H18N2O3S	311774-02-4	3850.65	354.104
9.25882	Benzyloxyacetaldehyde dimethyl acetal	52.98	C11H16O3	127657-97-0	35369.9	196.11
25.4234	Bicinchoninic acid	56.4315	C20H12N2O4	1245-13-2	28269.2	344.08
6.69758	Bis(dimethylamino)trifluorophosphorane	52.2208	C4H12F3N2P	1000306-14-7	26020.1	176.069
22.8418	Bis(pentamethylcyclopentadienyl)iron	50.6857	C20H30Fe	12126-50-0	42393.1	326.17
10.097	Bis(trimethylsilyl) methylboronate	75.3039	C7H21BO2Si2	1000376-32-7	71606.8	204.117
13.3482	Bisphenol A monomethyl ether, TMS derivative	60.8643	C19H26O2Si	1000283-55-5	16482.8	314.17
8.80174	Bisphenol C	60.5069	C17H20O2	79-97-0	587813	256.146
20.8092	Butylphosphonic acid, heptyl 4-(2-phenylprop-2-yl)phenyl ester	54.9795	C26H39O3P	1000323-09-7	110859	430.264
14.7528	Carbonic acid, monoamide, N-octyl-, hexyl ester	53.9853	C15H31NO2	1000406-70-9	473770	257.235
10.4976	Carbostyril, 3-ethyl-4-hydroxy-7-methoxy-	55.5957	C12H13NO3	22048-12-0	497817	219.09
26.4334	Cholestan-3-one, dimethylhydrazone, (5.alpha.)-	59.1422	C29H52N2	54966-63-1	757703	428.413
32.389	Cholesterol, TMS derivative	80.3092	C30H54OSi	1856-05-9	10518315	458.394
9.16879	Cinnoline, 6-chloro-4-phenyl-	56.0592	C14H9ClN2	21039-78-1	134200	240.045
11.5125	cis-2,3,4,5-Tetrahydro-2,4-diphenyl-1H-1,5-benzodiazepine	51.0463	C21H20N2	29584-14-3	19869.3	300.163
15.4754	Cloroiodoacetylene	50.5687	C2ClI	1000298-80-9	434749	185.873
21.4069	Cobalt, (.eta.5-2,4-cyclopentadien-1-yl)[(1,2,3,4,5,6-.eta.)-hexamethylbenzene]-	53.6796	C17H23Co	74811-00-0	62723.7	286.113
11.7776	Coumarin, 4-hydroxy-3-(p-hydroxyphenyl)-5,7-dimethoxy-	53.6028	C17H14O6	4222-01-09	54701.9	314.079
29.8134	Cyclodecasiloxane, eicosamethyl-	74.242	C20H60O10Si10	18772-36-6	103564	740.188
30.8492	Cyclodecasiloxane, eicosamethyl-	70.9823	C20H60O10Si10	18772-36-6	405728	740.188
28.6771	Cyclodecasiloxane, eicosamethyl-	78.4179	C20H60O10Si10	18772-36-6	121509	740.188
31.9266	Cyclodecasiloxane, eicosamethyl-	66.2378	C20H60O10Si10	18772-36-6	258874	740.188
27.492	Cyclodecasiloxane, eicosamethyl-	73.922	C20H60O10Si10	18772-36-6	492277	740.188
21.8615	Cyclodecasiloxane, eicosamethyl-	72.3526	C20H60O10Si10	18772-36-6	299041	740.188
23.4158	Cyclodecasiloxane, eicosamethyl-	50.9665	C20H60O10Si10	18772-36-6	164830	740.188
24.8555	Cyclodecasiloxane, eicosamethyl-	77.0268	C20H60O10Si10	18772-36-6	43797.2	740.188
20.1483	Cyclodecasiloxane, eicosamethyl-	79.2479	C20H60O10Si10	18772-36-6	153899	740.188
27.3084	Cyclohexanone, 2,6-bis(1-naphthylmethylene)-	52.6104	C28H22O	18977-34-9	4242.74	374.167
11.006	Cyclohexasiloxane, dodecamethyl-	75.4637	C12H36O6Si6	540-97-6	1890.63	444.113
15.7576	Cyclohexene, 3-ethyl-3,5,5-trimethyl-1-(trimethylsilyloxy)-	67.8195	C14H28OSi	160915-47-9	770317	240.191
18.2693	Cyclononasiloxane, octadecamethyl-	81.8987	C18H54O9Si9	556-71-8	284263	666.169
16.1661	Cyclooctasiloxane, hexadecamethyl-	65.8979	C16H48O8Si8	556-68-3	161435	592.15
13.9587	Cyclotrisiloxane, hexamethyl-	55.1941	C6H18O3Si3	541-05-9	92975	222.056
24.0274	Cymarin	51.1284	C30H44O9	508-77-0	597125	548.299
6.67342	D-(-)-Lactic acid, 2TMS derivative	90.1927	C9H22O3Si2	1000333-99-1	1.34869e+07	234.111
19.7108	D-(+)-Talose, pentakis(trimethylsilyl) ether, methyloxime (syn)	86.0649	C22H55NO6Si5	1000380-18-7	6.13141e+06	569.288
19.5669	D-Allose, pentakis(trimethylsilyl) ether, methyloxime (syn)	68.2929	C22H55NO6Si5	1000380-19-7	143907	569.288
24.448	D-Altro-2-Heptulose, 1,3,4,5,6-pentakis-O-(trimethylsilyl)-, O-methyloxime, 7-[bis(trimethylsilyl) phosphate]	54.4596	C29H74NO10PSi7	55470-94-5	17221.2	823.344
16.807	D-Arabinose, tetrakis(trimethylsilyl) ether, ethyloxime (isomer 2)	75.2449	C19H47NO5Si4	1000394-64-9	147937	481.253
11.1666	Decane, 1-iodo-	50.4476	C10H21I	2050-77-3	27311.8	268.069
6.10491	Decane, 4-methyl-	83.9634	C11H24	2847-72-5	453141	156.188
19.392	D-Fructose, 1,3,4,5,6-pentakis-O-(trimethylsilyl)-, O-methyloxime	60.9842	C22H55NO6Si5	56196-14-6	171275	569.288
19.9502	d-Glucose, 2,3,4,5,6-pentakis-O-(trimethylsilyl)-, o-methyloxyme, (1E)-	84.3533	C22H55NO6Si5	130405-10-6	1.23177e+06	569.288
24.5681	d-Glucose, 2,3,4,5-tetrakis-O-(trimethylsilyl)-, o-methyloxime, 6-[bis(trimethylsilyl) phosphate]	69.8431	C25H64NO9PSi6	55530-73-9	200186	721.293
28.6441	D-Glucose, 3-O-[6-deoxy-2,3,4-tris-O-(trimethylsilyl)-.alpha.-L-mannopyranosyl]-2,4,5,6-tetrakis-O-(trimethylsilyl)-	69.0483	C33H78O10Si7	56784-13-5	15469.9	830.398
11.602	Dihydrocodeine	52.2407	C18H23NO3	125-28-0	54686	301.168
20.1838	diindolo[3,2-b:3',2'-m]triphenodioxazine, 5,15-diethyl-5,15-dihydro-8,18-bis(2-methoxyphenoxy)-	50.7373	C48H36N4O6	1000400-02-7	888.118	764.263
9.62338	Dimethylaminoethyltrifluorophosphorane	61.238	C4H11F3NP	1000306-14-2	193476	161.058
5.37935	Disiloxane, hexamethyl-	87.7459	C6H18OSi2	107-46-0	467894	162.09
10.0694	Di-trimethylsilyl peroxide	73.3384	C6H18O2Si2	5796-98-5	221335	178.085
28.1876	D-Lactose, octakis(trimethylsilyl) ether, methyloxime (isomer 1)	71.8812	C37H89NO11Si8	1000380-10-3	203515	947.459
28.6413	D-Lactose, octakis(trimethylsilyl) ether, methyloxime (isomer 1)	65.9807	C37H89NO11Si8	1000380-10-3	164512	947.459
7.20157	dl-Alanine-beta-naphthylamide	52.5966	C13H14N2O	2149-46-4	1074.74	214.111
15.0239	DL-Phenylalanine, TMS derivative	54.6617	C12H19NO2Si	2899-42-5	3271.01	237.119
24.5693	D-Mannose, 2,3,4,5-tetrakis-O-(trimethylsilyl)-, O-methyloxime, 6-[bis(trimethylsilyl) phosphate]	51.7012	C25H64NO9PSi6	55530-76-2	122683	721.293
25.5509	D-Myo-Inositol, 1,2,4,5,6-pentakis-O-(trimethylsilyl)-, bis(trimethylsilyl) phosphate	78.0729	C27H69O9PSi7	55568-91-7	995158	764.306
14.134	Docosane, 1-iodo-	73.7623	C22H45I	1000406-31-9	1452.36	436.257
9.31534	Dodecane	84.4746	C12H26	112-40-3	238613	170.203
9.6996	Dodecane, 2-methyl-	74.9676	C13H28	1560-97-0	49244.5	184.219
17.231	Eicosane	80.2713	C20H42	112-95-8	366737	282.329
17.8327	Eicosane	63.6624	C20H42	112-95-8	39970.8	282.329
5.28972	Eicosyl isobutyl ether	54.0284	C24H50O	1000406-33-0	265365	354.386
16.6622	Estra-1,3,5(10)-trien-6-one, 3,17-bis(acetyloxy)-2-methoxy-, (17.beta.)-	54.8394	C23H28O6	69540-62-1	48468.7	400.189
21.6828	Ethane, 1-(dicyclopentylphosphino)-2-(dicyclopentylphosphinyl)-	61.1973	C22H40OP2	1000159-07-6	125318	382.255
11.4484	ethanol, 2,2'-[(1-methylethylidene)bis(4,1-phenyleneoxy)]bis-	52.7467	C19H24O4	1000402-29-3	18209.5	316.167
5.12309	Ethyl iso-allocholate	55.8886	C26H44O5	1000043-05-3	365251	436.319
32.5118	Ethylamine, N,N-didecyl-2-(2-thiophenyl)-	60.8541	C26H49NS	1000310-35-0	117760	407.359
34.9868	Ethylamine, N,N-didecyl-2-(2-thiophenyl)-	53.8634	C26H49NS	1000310-35-0	52160.5	407.359
32.9292	Ethylamine, N,N-didecyl-2-(2-thiophenyl)-	66.7325	C26H49NS	1000310-35-0	169176	407.359
35.1893	Ethylamine, N,N-didecyl-2-(2-thiophenyl)-	52.9733	C26H49NS	1000310-35-0	88129.6	407.359
19.6729	Flecainide, N,N'-bis(trifluoroacetyl)	51.4908	C21H18F12N2O5	1000417-29-4	74730.1	606.102
19.5104	Fructose oxime, hexakis(trimehylsilyl)	62.8659	C24H61NO6Si6	120788-24-1	57703.8	627.311
23.8641	Fumaric acid, 4-cyanophenyl 2,2,3,3,4,4,5,5-octafluoropentyl ester	53.552	C16H9F8NO4	1000405-73-0	430613	431.04
21.7137	Fumaric acid, di(2,2,3,3,4,4,5,5-octafluoropentyl) ester	65.212	C14H8F16O4	1000348-79-7	136494	544.017
10.4327	Fumaric acid, monoamide, N-(2-fluorophenyl)-, 3-fluorophenyl ester	52.7979	C16H11F2NO3	1000357-48-6	16785.5	303.071
35.565	Fumaric acid, monoamide, N-allyl-, 2,6-dimethoxyphenyl ester	68.9031	C15H17NO5	1000357-45-8	7149.9	291.111
13.7392	Furo[2,3-H]coumarine, 1,2-dihydro-6-methyl-1-oxo-2-phenylhydrazono-	50.7303	C18H12N2O4	324527-13-1	207510	320.08
7.74349	Glutaric acid, 3-chlorophenyl 3-methylbut-3-en-1-yl ester	52.149	C16H19ClO4	1000404-96-7	567.849	310.097
14.5699	Glutaric acid, decyl 2-phenoxyethyl ester	53.7685	C23H36O5	1000376-92-2	93943.3	392.256
29.1084	Glycerol monostearate, 2TMS derivative	81.524	C27H58O4Si2	1188-75-6	9.8089e+06	502.387
10.506	Glycerol, 3TMS derivative	87.6287	C12H32O3Si3	6787-10-06	6.26709e+06	308.166
32.4351	Glycine, 2-cyclohexyl-N-(but-3-yn-1-yl)oxycarbonyl-, decyl ester	52.5383	C23H39NO4	1000383-19-1	1.41799e+06	393.288
11.0568	Glycine, 3TMS derivative	84.1574	C11H29NO2Si3	5630-82-0	1.15292e+06	291.151
24.3346	Glycine, N,N-dimethyl-, ethyl ester	67.3857	C6H13NO2	33229-89-9	499555	131.095
6.97711	Glycolic acid, 2TMS derivative	65.9698	C8H20O3Si2	33581-77-0	78123.6	220.095
10.0125	Heptadecane	65.5563	C17H36	629-78-7	41558.3	240.282
12.742	Heptadecane	52.3699	C17H36	629-78-7	596503	240.282
20.0138	Heptadecane, 2-methyl-	68.6803	C18H38	1560-89-0	383100	254.297
20.5458	Heptadecane, 2-methyl-	66.7604	C18H38	1560-89-0	131930	254.297
22.7746	Heptadecanoic acid, TMS derivative	79.9631	C20H42O2Si	55517-58-3	1.66672e+07	342.295
23.581	Heptane, 1,1-dimethoxy-	58.0189	C9H20O2	10032-05-0	981526	160.146
7.59714	Heptane, 4-ethyl-	65.1179	C9H20	2216-32-2	60387.2	128.157
29.4824	Heptasiloxane, hexadecamethyl-	56.9471	C16H48O6Si7	541-01-5	309844	532.184
20.9948	Heptasiloxane, hexadecamethyl-	52.4265	C16H48O6Si7	541-01-5	173774	532.184
22.6884	Heptasiloxane, hexadecamethyl-	53.5524	C16H48O6Si7	541-01-5	540.736	532.184
19.1579	Heptasiloxane, hexadecamethyl-	53.4598	C16H48O6Si7	541-01-5	38676.4	532.184
28.3007	Heptasiloxane, hexadecamethyl-	52.8643	C16H48O6Si7	541-01-5	379354	532.184
25.6812	Heptasiloxane, hexadecamethyl-	52.9285	C16H48O6Si7	541-01-5	128813	532.184
11.4114	Hexadecane	62.099	C16H34	544-76-3	403682	226.266
17.1826	Hexadecane	55.1889	C16H34	544-76-3	83578.2	226.266
12.9779	Hexadecane	62.1959	C16H34	544-76-3	119444	226.266
28.4781	Hexadecanoic acid, 1a,2,5,5a,6,9,10,10a-octahydro-5a-hydroxy-4-(hydroxymethyl)-1,1,7,9-tetramethyl-6,11-dioxo-1H-2,8a-methanocyclopenta[a]cyclopropa[e]cyclodecen-5-yl ester, [1aR-(1a.alpha.,2.alpha.,5.beta.,5a.beta.,8a.alpha.,9.alpha.,10a.alpha.)]-	52.3685	C36H56O6	77508-69-1	73940.7	584.408
6.68103	Hexane, 3,3-dimethyl-	86.4521	C8H18	563-16-6	456962	114.141
5.72573	Imidazoline, 1,3-dinitro-	64.6368	C3H6N4O4	5754-91-6	358666	162.039
9.52344	Isonipecotic acid, N-allyloxycarbonyl-, octyl ester	52.3797	C18H31NO4	1000321-99-5	130396	325.225
11.0524	Isophthalic acid, 2-methylprop-2-en-1-yl nonyl ester	52.8885	C21H30O4	1000343-95-2	155275	346.214
26.2485	Isophthalic acid, 3,5-difluorophenyl pentadecyl ester	54.1675	C29H38F2O4	1000344-38-0	10618.3	488.274
14.5577	L-5-Oxoproline, , 2TMS derivative	84.9802	C11H23NO3Si2	30274-77-2	3.18651e+06	273.122
8.49539	Lactic Acid, 2TMS derivative	67.2381	C9H22O3Si2	17596-96-2	138059	234.111
29.5723	Lactulose, octakis(trimethylsilyl) ether, methyloxime (isomer 1)	56.8958	C37H89NO11Si8	1000380-09-7	139203	947.459
9.37375	l-Allylglycine, N-methoxycarbonyl-, dodecyl ester	51.2708	C19H35NO4	1000325-15-7	109067	341.257
13.0578	L-Aspartic acid, 2TMS derivative	70.0431	C10H23NO4Si2	1000333-28-8	509048	277.117
14.5396	L-Aspartic acid, 3TMS derivative	65.7221	C13H31NO4Si3	55268-53-6	396071	349.156
15.1106	L-Fucitol, 5TMS derivative	52.4121	C21H54O5Si5	1000380-13-7	279081	526.282
16.0295	L-Glutamic acid, 3TMS derivative	69.2695	C14H33NO4Si3	15985-07-6	134422	363.172
10.0119	L-Homoserine lactone, N-acetyl-	63.2649	C6H9NO3	1000374-76-0	84837.3	143.058
8.45425	L-Leucine, TMS derivative	60.5631	C9H21NO2Si	1000333-25-0	159108	203.134
31.234	L-Lysine, N6-acetyl-N2-[N-[N-[N-(N2-acetyl-N,N,N2-trimethyl-L-asparaginyl)-N-methyl-L-phenylalanyl]-N-methyl-L-phenylalanyl]-N,1-dimethyl-L-tryptophyl]-N2,N6-dimethyl-, methyl ester	52.7247	C53H72N8O9	56818-04-3	58244.1	964.542
26.4299	l-Norvaline, n-pentadecafluorooctanoyl-, undecyl ester	53.4531	C24H32F15NO3	1000328-66-8	24145.2	667.214
10.2292	L-Serine, 2TMS derivative	69.878	C9H23NO3Si2	70125-39-2	369053	249.122
15.1	L-Threonic acid, tris(trimethylsilyl) ether, trimethylsilyl ester	78.2587	C16H40O5Si4	1000352-53-3	121262	424.195
10.8581	L-Threonine, 2TMS derivative	57.815	C10H25NO3Si2	7536-82-5	235004	263.137
12.3874	L-Threonine, 3TMS derivative	75.8226	C13H33NO3Si3	7537-02-02	101160	335.177
7.28553	L-Valine, N-(2-methoxybenzoyl)-, hexadecyl ester	52	C29H49NO4	1000346-60-0	785.515	475.366
7.22508	L-Valine, TMS derivative	69.5957	C8H19NO2Si	7480-78-6	316745	189.119
27.1625	Lycoxanthin	55.6281	C40H56O	19891-74-8	218689	552.433
14.0401	Malic acid, 3TMS derivative	80.0605	C13H30O5Si3	38166-11-9	439271	350.14
12.2787	Malonic acid, 3,3-dimethylbut-2-yl dodecyl ester	51.9443	C21H40O4	1000348-66-3	55141.9	356.293
10.7443	Methanone, 3,4-furazandiylbis[(4-fluorophenyl)-	50.8884	C16H8F2N2O3	55232-38-7	44400.3	314.05
29.1305	methanone, bis(phenylsulfonyl)-, 2-phenylhydrazone	71.3995	C28H20N2O	1000398-95-0	135075	400.158
9.95773	Methoxyacetic acid, 2-propenyl ester	50.1815	C6H10O3	53421-44-6	40137.5	130.063
33.7821	Methyl 2-[2-(4-chlorophenyl)-5-methyl-1H-imidazol-1-yl]dithiobenzoate	52.5735	C18H15ClN2S2	105251-31-8	285387	358.037
6.50007	Methyl aminoacetate, 2TMS derivative	70.3354	C9H23NO2Si2	25688-73-7	155484	233.127
7.45743	Methyl N-[2-thienylsulfonyl]dithiocarbamate	54.7043	C6H7NO2S4	57381-14-3	61811.6	252.936
6.24237	Methyltris(trimethylsiloxy)silane	87.9768	C10H30O3Si4	17928-28-8	737188	310.127
20.3813	Morphinan-4,5-epoxy-3,6-di-ol, 6-[7-nitrobenzofurazan-4-yl]amino-	50.6607	C26H27N5O6	1000129-09-6	78099.5	505.196
20.886	Morphinan-8-ol, 6,7-didehydro-4,5-epoxy-3-methoxy-17-methyl-, (5.alpha.,8.alpha.)-	51.985	C18H21NO3	509-55-7	103824	299.152
26.051	Myo-Inositol, 1,3,4,5,6-pentakis-O-(trimethylsilyl)-, bis(trimethylsilyl) phosphate	50.9936	C27H69O9PSi7	33910-06-4	137988	764.306
22.0613	Myo-Inositol, 6TMS derivative	86.8744	C24H60O6Si6	2582-79-8	3.38861e+06	612.301
19.2025	Myristic acid, TMS derivative	79.1614	C17H36O2Si	18603-17-3	316629	300.248
29.0755	N-(2,6-Dichlorophenyl)-2,2-difluoro-2-(2,3,3,4,4,5,5-heptafluorotetrahydrofuran-2-yl)acetamide	55.7127	C12H4Cl2F9NO2	1000311-96-5	1288.23	434.948
14.6944	N-(2-Dimethylamino-6-ethoxy-4-oxo-7,8-diphenyl-4,6-dihydropyrrolo(1,2-a)pyrimidin-6-yl)-acetamide	55.5912	C25H26N4O3	113362-50-8	5684	430.2
24.1026	Naltrexone	50.9392	C20H23NO4	16590-41-3	395636	341.163
6.55886	Naphthalene-2-sulfonamide	53.4728	C10H9NO2S	1576-47-2	69275.1	207.035
7.49599	Nonane, 4,5-dimethyl-	81.0438	C11H24	17302-23-7	500962	156.188
32.4084	O,O-Dimethyl (4-nitrobenzyl)thiophosphonate	50.9656	C9H12NO4PS	80879-49-8	104192	261.022
13.3815	o-Anisic acid, 2-adamantyl ester	54.7231	C18H22O3	1000299-94-8	550.713	286.157
10.6125	Octadecane	79.0389	C18H38	593-45-3	1.23969e+06	254.297
18.607	Octadecane, 2-methyl-	59.7005	C19H40	1560-88-9	60394.8	268.313
7.58348	Octane, 2-methyl-	51.2212	C9H20	3221-61-2	10022.3	128.157
6.78827	Octane, 3,4,5,6-tetramethyl-	83.4173	C12H26	62185-21-1	560053	170.203
32.4606	Olean-12-en-11-one	51.0803	C30H48O	10070-81-2	543725	424.371
10.7633	Oxalic acid, 2-ethylhexyl isobutyl ester	51.0784	C14H26O4	1000309-38-5	82479.7	258.183
21.636	Palmitic Acid, TMS derivative	86.4772	C19H40O2Si	55520-89-3	5.43445e+07	328.28
22.5288	Pentacosane	68.5772	C25H52	629-99-2	418039	352.407
22.9142	Pentadecanoic acid, triethylsilyl ester	51.6202	C21H44O2Si	1000279-44-3	70794.4	356.311
33.2502	Pentafluoropropanamide, N,N-dinonyl-	53.4985	C21H38F5NO	1000308-51-6	64344.9	415.287
16.7645	Pentane, 2,3,3,4-tetramethyl-	51.8629	C9H20	16747-38-9	631.91	128.157
5.94469	Pentane, 3-ethyl-3-methyl-	73.5719	C8H18	1067-08-9	252290	114.141
8.61054	Pentasiloxane, dodecamethyl-	78.6498	C12H36O4Si5	141-63-9	273848	384.146
23.5796	Petroselinic acid, TMS derivative	68.4634	C21H42O2Si	96851-53-5	2.29691e+06	354.295
10.3337	Phenylephrine, N,O,O-tris(heptafluorobutyryl) deriv.	50.6023	C21H10F21NO5	1000281-49-2	619.109	755.022
10.6324	Phosphonic acid, tri-(trimethylsilyl) derivative	55.4261	C9H27O4PSi3	1000386-39-3	484909	314.095
17.4784	Phosphoric acid, 2-(trimethylsiloxy)-1-[(trimethylsiloxy)methyl]ethyl bis(trimethylsilyl) ester	72.8386	C15H41O6PSi4	31038-12-7	92817.7	460.172
17.9743	Phosphoric acid, bis(trimethylsilyl) 2,3-bis[(trimethylsilyl)oxy]propyl ester	75.0091	C15H41O6PSi4	31038-11-6	27727	460.172
8.80129	Phosphoric acid, bis(trimethylsilyl)monomethyl ester	74.1747	C7H21O4PSi2	18291-81-1	755034	256.072
21.1331	Piperazine, 1-[5-fluoropentyl]-4-[(3,4-dichlorophenyl)acetyl]-	53.1515	C17H23Cl2FN2O	141044-94-2	108573	360.117
23.005	Piperazine, 1-[5-fluoropentyl]-4-[(3,4-dichlorophenyl)acetyl]-	60.965	C17H23Cl2FN2O	141044-94-2	91328.8	360.117
26.9289	Piperazine, 1-[5-fluoropentyl]-4-[(3,4-dichlorophenyl)acetyl]-	56.6258	C17H23Cl2FN2O	141044-94-2	525396	360.117
5.26925	Propane, 1,2-dichloro-2-methyl-	56.3382	C4H8Cl2	594-37-6	84822.3	126
9.08947	Propane, 1,3-bis[2-(2-pyridyl)ethyl(methyl)phosphino]-	54.4175	C19H28N2P2	155340-57-1	27131.7	346.173
14.1373	Propanenitrile, 2-[(2,2-dimethyl-4,4-diphenyl-3-oxetanylidene)amino]-2-methyl-	50.5528	C21H22N2O	55044-21-8	792.593	318.173
15.846	Propanethioic acid, 2-methyl-, S-ethyl ester	53.1273	C6H12OS	2432-50-0	114938	132.061
12.3541	Propanoic acid, 3,3,3-trifluoro-2-[(2-fluorophenyl)amino]-2-[(2-furanylcarbonyl)amino]-, ethyl ester	50.6354	C16H14F4N2O4	1000362-44-3	25708.7	374.089
27.4752	Purin-2,6-dione, 1,3,7-trimethyl-8-[2-[3,5-dimethoxyphenyl]ethenyl]-	55.2353	C18H20N4O4	1000127-65-7	39106	356.148
11.8452	Pyridine, 3-methyl-2,6-diphenyl-	52.9092	C18H15N	28489-52-3	13136	245.12
10.9108	Pyridine-3-carboxylic acid, 2-methyl-5-nitro-, ethyl ester	51.8228	C9H10N2O4	51984-71-5	51454	210.064
28.7839	Pyrido[3,4-d]pyrimidine-2,4(1H,3H)-dione, 6,8-dimethyl-	50.263	C9H9N3O2	22389-87-3	139021	191.069
32.8968	Pyrimidine, 2-(1-adamantyl)-4-(2,4-dimethyl-5-oxazolyl)-	56.6507	C19H23N3O	254982-31-5	121244	309.184
14.3895	Pyroglutamic acid, TMS derivative	60.4835	C8H15NO3Si	1000333-17-1	300938	201.082
8.12925	Quinaldic acid, 1,2,3,4-tetrahydro-8-hydroxy-4-oxo-, L-	54.1667	C10H9NO4	4886-42-4	32670.7	207.053
33.692	quino[2,3-b]acridine-7,14-dione, 5,6a-dihydro-	56.6998	C20H12N2O2	1000397-71-7	216285	312.09
8.3891	Quinoline-3-carboxamide, 1,2-dihydro-4-hydroxy-2-oxo-N-phenyl-	63.2373	C16H12N2O3	16798-54-2	16058.3	280.085
22.2335	Quinoline-3-carboxylic acid, 1,4,5,6,7,8-hexahydro-2-methyl-4-(5-methyl-2-thienyl)-5-oxo-, cyclopentyl ester	50.8873	C21H25NO3S	347352-29-8	104780	371.156
21.3145	Scyllo-Inositol, 6TMS derivative	50.1203	C24H60O6Si6	14251-18-4	99391.1	612.301
20.196	Sedoheptulose, o-methyloxime, hexakis-O-(trimethylsilyl)-	58.2833	C26H65NO7Si6	1000298-66-2	51138.4	671.338
11.9816	Serine, 3TMS derivative	65.8637	C12H31NO3Si3	64625-17-8	165409	321.161
8.14449	Silane, 1,8-octanediylbis[trimethyl-	63.5297	C14H34Si2	65118-88-9	7.68106e+06	258.22
8.53865	Silane, cyclohexyldimethoxymethyl-	90.5089	C9H20O2Si	17865-32-6	913483	188.123
18.0593	Silane, diethylbutoxy(2-methylbutoxy)-	52.4754	C13H30O2Si	1000363-09-8	1739.81	246.202
26.4988	Silane, diethylbutoxypentyloxy-	65.003	C13H30O2Si	1000363-03-0	462369	246.202
13.9206	Silane, diethylheptadecyloxy(2-phenylethoxy)-	68.485	C29H54O2Si	1000363-17-2	34476.7	462.389
33.5543	Silane, diethylheptyloxytridecyloxy-	61.2392	C24H52O2Si	1000363-95-6	143456	400.374
32.0252	Silane, diethylhexyloxypentadecyloxy-	54.5127	C25H54O2Si	1000363-74-3	311785	414.389
34.2802	Silane, diethylisohexyloxyoctadecyloxy-	58.0774	C28H60O2Si	1000363-32-5	24133.7	456.436
29.0984	Silane, diethylpentyloxy(2,4,5-trichlorophenoxy)-	51.4941	C15H23Cl3O2Si	1000363-35-2	523725	368.053
10.9343	Silane, diethylpentyloxyundecyloxy-	53.9255	C20H44O2Si	1000363-03-8	38210.4	344.311
23.9969	Silane, dimethyl(dimethyl(dimethyl(2-isopropylphenoxy)silyloxy)silyloxy)(2-isopropylphenoxy)-	58.2058	C24H40O4Si3	1000347-25-6	241463	476.223
23.8849	Silane, dimethyl(pentafluorobenzyloxy)hexyloxy-	56.7007	C15H21F5O2Si	1000347-26-3	4.30737e+06	356.123
32.4009	Silane, dimethyl(phenylmethyl)[(6,6,9-trimethyl-3-pentyl-6H-dibenzo[b,d]pyran-1-yl)oxy]-	54.8536	C30H38O2Si	65598-38-1	448474	458.264
10.4537	Silanol, trimethyl-, phosphate (3:1)	84.919	C9H27O4PSi3	10497-05-9	1.04607e+07	314.095
11.5939	Spiro[azetidine-2,9'-fluoren]-4-one, 3-ethyl-1,3-diphenyl-	51.4024	C29H23NO	15183-53-6	49210.4	401.178
15.3865	Spirost-8-en-11-one, 3-hydroxy-, (3.beta.,5.alpha.,14.beta.,20.beta.,22.beta.,25R)-	50.2727	C27H40O4	58072-54-1	154922	428.293
23.8739	Stearic acid, TMS derivative	90.091	C21H44O2Si	18748-91-9	2.22148e+07	356.311
9.54337	s-Triazolo[1,5-a]pyridine, 6-nitro-2-phenyl-	55.7684	C12H8N4O2	31040-17-2	37868.3	240.065
26.1964	Succinic acid, 2-methylpent-3-yl 3-nitrophenyl ester	52.6204	C16H21NO6	1000390-13-5	126043	323.137
14.8281	Succinic acid, 3-methylbut-2-yl 2,2,3,4,4,4-hexafluorobutyl ester	53.5268	C13H18F6O4	1000390-80-0	181021	352.111
18.5374	Succinic acid, 4-chloro-3-methylphenyl pentafluorobenzyl ester	50.2451	C18H12ClF5O4	1000389-89-0	19178.9	422.034
12.2361	Succinic acid, di(2-(2-chlorophenoxy)ethyl) ester	58.8196	C20H20Cl2O6	1000381-54-5	19937.3	426.064
8.83717	t-Butoxycarbonylleucylproline	51.6627	C16H28N2O5	1000193-48-7	142782	328.2
33.1608	Terbutaline, N-trifluoroacetyl-O,O,o-tris(trimethylsilyl)deriv.	50.3088	C23H42F3NO4Si3	325836-92-8	234985	537.237
11.8816	Terephthalic acid, methyl heptyl ester	51.2088	C16H22O4	1000382-95-8	3858.25	278.152
11.2865	tert-Leucine, N-ethoxycarbonyl-, isohexyl ester	56.364	C15H29NO4	1000344-18-5	35007	287.21
26.2066	Tetracosamethyl-cyclododecasiloxane	57.8713	C24H72O12Si12	18919-94-3	204109	888.226
23.4126	Tetracosamethyl-cyclododecasiloxane	77.5131	C24H72O12Si12	18919-94-3	346755	888.226
31.9264	Tetracosamethyl-cyclododecasiloxane	51.2301	C24H72O12Si12	18919-94-3	228589	888.226
12.908	Tetradecane, 4-methyl-	52.4775	C15H32	25117-24-2	103619	212.25
14.5414	Tetrahydropyrrole-2,5-dione, 1,3-dimethyl-3-[3-methoxyphenyl]-	51.5445	C13H15NO3	1000128-52-0	177393	233.105
6.56872	Tetrasiloxane, decamethyl-	64.7665	C10H30O3Si4	141-62-8	41489.3	310.127
23.792	Thebacon	56.1243	C20H23NO4	466-90-0	7898.26	341.163
15.9463	Thiazole, 2-(4-chlorophenyl)-4-methyl-	51.6759	C10H8ClNS	25100-91-8	23692.9	209.007
6.01206	Trichloroethanol, TBDMS derivative	56.7062	C8H17Cl3OSi	86379-25-1	487654	262.011
11.3411	Trisiloxane, octamethyl-	75.714	C8H24O2Si3	107-51-7	2.19021e+06	236.108
12.7747	Tromethamine, 3TMS derivative	83.1745	C13H35NO3Si3	1000366-66-0	611505	337.192
19.6526	Tyrosine, 2TMS derivative	62.4415	C15H27NO3Si2	7536-83-6	355364	325.153
9.53439	Undecane, 2,5-dimethyl-	64.5266	C13H28	17301-22-3	277264	184.219
17.3004	Undecane, 2,6-dimethyl-	52.8112	C13H28	17301-23-4	60904.3	184.219
14.1558	Undecane, 2-methyl-	59.6485	C12H26	7045-71-8	9665.02	170.203
8.66109	Undecane, 2-methyl-	71.7983	C12H26	7045-71-8	165302	170.203
15.835	Undecane, 6-methyl-	60.3777	C12H26	17302-33-9	195863	170.203
11.6027	Uracil, 2TMS derivative	78.3159	C10H20N2O2Si2	10457-14-4	419216	256.106

## Sheet: Supplementary table 4
Retention Time (RT)	Metabolites	% similarity	Molecular Formula	CAS Number	Peak Area	Molecular Weight (MW)
7.80188	(1S,2S)-(+)-N-Methylpseudoephedrine	51.3129	C11H17NO	51018-28-1	21534.9	179.131
7.72506	(2S,3R)-3-[(4E,7E)-Nona-4,7-dienoyl]-N,N-bis(trimethylsilyl)oxirane-2-carboxamide	59.3958	C18H33NO3Si2	1000395-61-1	4.21467e+06	367.2
16.3031	.alpha.-[3-Pyridyl]cinnamic acid, cis-	54.6542	C14H11NO2	233765-13-4	416.668	225.079
25.4503	.alpha.-D-Glucopyranose, 2,3,4,6-tetrakis-O-(trimethylsilyl)-, bis(trimethylsilyl) phosphate	52.005	C24H61O9PSi6	55520-79-1	219682	692.267
13.0885	.beta.-Alanine, 3TMS derivative	81.7643	C12H31NO2Si3	55255-77-1	622151	305.166
34.7391	.beta.-Alanine, N-(3-methylbenzoyl)-, tetradecyl ester	53.3292	C25H41NO3	1000321-63-6	241318	403.309
29.5762	.beta.-D-Galactopyranoside, methyl 2,3-bis-O-(trimethylsilyl)-, cyclic methylboronate	55.6492	C14H31BO6Si2	56211-08-6	55408.8	362.175
24.2433	.beta.-D-Glucopyranuronic acid, 5TMS derivative	58.603	C21H50O7Si5	52842-24-7	609886	554.24
29.1651	.beta.-Gentiobiose, octakis(trimethylsilyl) ether, methyloxime (isomer 1)	51.9929	C37H89NO11Si8	1000380-10-9	135082	947.459
34.5657	.beta.-Sitosterol, TMS derivative	61.0174	C32H58OSi	2625-46-9	152074	486.426
19.9878	[1,1'-Biphenyl]-2,2'-dicarbonitrile	51.9097	C14H8N2	4341-02-0	25790.1	204.069
23.0361	[1,2,4]Oxadiazole, 5-(4-tert-butylphenoxymethyl)-3-(thiophen-2-yl)-	56.3701	C17H18N2O2S	1000304-93-9	112625	314.109
12.18	{4-Methoxy-2-[(trimethylsilyl)oxy]phenyl}(4-methylphenyl)methanone	62.548	C18H22O3Si	1000408-24-6	36701.6	314.134
31.7409	1-((6-Quinolinylimino)methyl)-2-naphthol tms	50.6397	C23H22N2OSi	1000331-93-0	43609.1	370.15
19.9391	1-(1-Adamantyl)-2-tributylsilyloxyethane	66.9589	C24H46OSi	1000283-14-0	186445	378.332
19.9796	1-(1-Adamantyl)-2-tributylsilyloxyethane	57.5633	C24H46OSi	1000283-14-0	82135.1	378.332
19.6922	1-(1-Adamantyl)-2-tributylsilyloxyethane	67.359	C24H46OSi	1000283-14-0	83629.6	378.332
6.13574	1-(2-Thioxo-[1,3]diazepan-1-yl)-ethanone	56.5042	C7H12N2OS	16302-82-2	546951	172.067
32.4457	1-(3-Methylbutyl)-2,3,5-trimethylbenzene	56.7253	C14H22	107997-60-4	5.71478e+07	190.172
13.1662	1-(p-Fluorophenyl)-4-piperidone	51.9228	C11H12FNO	1000238-56-7	1429.75	193.09
9.65393	1,1'-(p-Phenylene)bis(3-tert-butylcarbodiimide)	56.0823	C16H22N4	14925-77-0	662.837	270.184
13.7549	1,1'-Biphenyl, 3,3',4,4',5,5'-hexamethoxy-	52.6937	C18H22O6	56772-00-0	65778.9	334.142
20.1658	1,2,3,4-Butanetetrol, 1-[2-(2-fluorophenyl)-2H-1,2,3-triazol-4-yl]-, [1R-(1R*,2S*,3R*)]-	57.7288	C12H14FN3O4	51306-42-4	94084.4	283.097
32.7892	1,2,4-benzenetricarboxylic acid, 3,5-dinitro-, trimethyl ester	52.9444	C12H10N2O10	1000398-22-5	32373.4	342.034
29.4912	1,2,4-Benzenetricarboxylic acid, trimethyl ester	52.67	C12H12O6	2459-10-01	290981	252.063
7.14278	1,3-Butadienecyclopentadienylvanadium dicarbonyl	50.2722	C11H11O2V	129002-03-5	41620.9	226.02
31.9999	1,3-Diiminoisoindoline	64.2023	C8H7N3	57500-34-2	2.76257e+06	145.064
22.7723	1,3-Dioxolane, 4-[[(2-butoxyhexadecyl)oxy]methyl]-2,2-dimethyl-	50.658	C26H52O4	56256-29-2	226343	428.387
5.43919	1,3-Dithiol-2-one, 4,5-bis(cyanomethylthio)-	51.8061	C7H4N2OS4	179010-13-0	8525.97	259.921
10.494	1,3-Dithiole-2-thione, 4-phenyl-	51.0995	C9H6S3	2314-61-6	62065.7	209.963
5.43121	1,3-propanediamine, 2-(5-ethenyl-2-pyridinyl)-N1,N1,N3,N3-tetramethyl-	53.4732	C14H23N3	1000401-05-2	147594	233.189
33.1691	1,4-benzenediol, 2-bromo-5-dodecyl-	51.6933	C18H29BrO2	1000398-43-6	169135	356.135
14.9145	1,4-Naphthalenedione, 2-acetyl-3,5,6,8-tetrahydroxy-	51.4563	C12H8O7	3718-80-7	701.467	264.027
8.79458	10-Ethyl-5,10-dihydrophenarsazine	54.0666	C14H14AsN	53573-13-0	133096	271.034
25.5685	10H-Phenothiazin-3-ol, 10-[3-(dimethylamino)propyl]-, acetate (ester)	56.7266	C19H22N2O2S	56438-23-4	41884.2	342.14
32.0536	17.beta.-Acetoxy-1',1'-dicarboethoxy-1.beta.,2.beta.-dihydrocycloprop[1,2]-5.alpha.-androst-1-en-3-one	53.0575	C28H40O7	80097-21-8	667109	488.277
8.82218	1-Aminocyclopentanecarboxylic acid, N-(octyloxycarbonyl)-, hexyl ester	59.1626	C21H39NO4	1000392-56-3	8208.58	369.288
20.6192	1-Azaspiro[4.4]nonane-2,6-dione, 1-[2-(1,3-benzodioxol-5-yl)ethyl]-, .+/-.-	52.9397	C17H19NO4	114942-69-7	74521.3	301.131
30.839	1-Butyl-3-phenylurea	69.4553	C11H16N2O	3083-88-3	94973.4	192.126
15.6186	1-Cyano-4-diphenyl(tert-butyl)silyloxybenzene	54.92	C23H23NOSi	1000307-86-7	3445.75	357.155
13.7783	1-Cyano-4-diphenyl(tert-butyl)silyloxybenzene	59.7868	C23H23NOSi	1000307-86-7	10252	357.155
13.5673	1-Cyano-4-diphenyl(tert-butyl)silyloxybenzene	50.382	C23H23NOSi	1000307-86-7	2145.45	357.155
11.7649	1-Cyano-4-diphenyl(tert-butyl)silyloxybenzene	69.1102	C23H23NOSi	1000307-86-7	1411.11	357.155
11.1576	1-Cyano-4-diphenyl(tert-butyl)silyloxybenzene	57.282	C23H23NOSi	1000307-86-7	121109	357.155
19.6492	1-Cyclohexyldimethylsilyloxy-2-phenylethane	61.015	C16H26OSi	1000282-21-3	1064.69	262.175
11.2594	1-Dimethylisopropylsilyloxy-4-methoxybenzene	57.5527	C12H20O2Si	1000307-91-1	16830.6	224.123
20.2066	1-Diphenyl(tert-butyl)silyloxy-4-nitrobenzene	55.9365	C22H23NO3Si	1000307-86-9	32350.1	377.145
7.10603	1H-1,3-Benzimidazol-4-amine, 5-methyl-	57.5001	C8H9N3	1000362-59-1	53751	147.08
18.6496	1H-1-Pyrindine-2,7-dione, 1-[2-(1,3-benzodioxol-5-yl)ethyl]-3,4,5,6-tetrahydro-	50.841	C17H17NO4	114942-65-3	2347.48	299.116
12.5075	1H-Indol-2-one, 2,3-dihydro-1-acetyl-3-(5-methylthio-2-furfurylidene)-	68.1405	C16H13NO3S	64259-23-0	67643.6	299.062
17.1521	1H-Indol-2-one, 2,3-dihydro-1-acetyl-3-(5-methylthio-2-furfurylidene)-	52.058	C16H13NO3S	64259-23-0	44699.4	299.062
12.8282	1H-Indole, 2-(4-chlorobutyl)-3-phenyl-	52.2509	C18H18ClN	163064-75-3	4143.77	283.113
10.5317	1H-Pyrrole-3-carbonitrile, 2-amino-4-methyl-5-(phenylmethyl)-	50.2014	C13H13N3	1000351-31-6	100905	211.111
19.7199	1-Hydroxyinden-3-one-1-carboxylic acid	55.4083	C10H8O4	1000215-33-8	3.05129e+07	192.042
23.6264	1-Methyl-3,5,6-trimethyl-hexahydropyrimidin-2,4-dione, cis-	51.8568	C23H20N2O2	1000145-75-6	3591.4	356.152
27.335	1-Monopalmitin, 2TMS derivative	79.8818	C25H54O4Si2	1188-74-5	187321	474.356
33.2661	1-Octadecanamine, N-(2-methoxypropyl)-N-methyl-	50.9359	C23H49NO	1000196-18-5	153016	355.381
6.97275	1-Pentamethyldisilyloxypentadecane	59.0512	C20H46OSi2	1000216-95-0	19195.3	358.309
32.3729	1-Propanone, 1-(1-cyclohexen-1-yl)-	58.6495	C9H14O	1655-03-4	2.04342e+06	138.104
5.28376	1-Tetrazol-2-ylethanone	57.9702	C3H4N4O	51410-11-8	221775	112.039
28.3165	1-Triisopropylsilyloxyheptadecane	70.717	C26H56OSi	1000283-10-1	48161.8	412.41
17.7048	2-(4-Iodobenzyl)cyclopentanone	52.584	C12H13IO	1000311-91-2	879.983	300.001
17.3979	2-(4-Iodobenzyl)cyclopentanone	59.1589	C12H13IO	1000311-91-2	26401.3	300.001
21.7967	2-(4-Methoxyphenyl)-8-chloro-4H-imidazo(2,1-c)(1,4)benzoxazine	54.8684	C17H13ClN2O2	104971-84-8	38059.5	312.067
25.5183	2-(6-Ethoxy-2-methylimino-4H-1-thia-3,9- diazaanthracen-3-yl)ethanol	55.1267	C16H19N3O2S	1000311-55-1	476.382	317.12
17.1111	2-(Acridin-9-ylamino)-4-methyl-phenol	58.1807	C20H16N2O	1000317-44-4	2977.49	300.126
14.0345	2,2'-Bis(4,5-dimethylimidazole)	56.8488	C10H14N4	69286-06-2	351773	190.122
8.15374	2,2'-Bis(4,5-dimethylimidazole)	70.0075	C10H14N4	69286-06-2	231404	190.122
15.1142	2,3,4-Trihydroxybutyric acid tetrakis(trimethylsilyl) deriv., (, (R*,R*)-)	72.3012	C16H40O5Si4	38191-88-7	36598.5	424.195
12.8245	2,3-Dicyanoquinoxaline	59.0639	C10H4N4	17132-92-2	4839	180.044
22.7681	2,3-Dihydroindenone, 7-methoxy-4-[2,3,4-trimethoxyphenyl]-	52.846	C19H20O5	127825-97-2	378144	328.131
23.9014	2,3-Dimethoxy-15-methyl-6,7,9,11,12,15-hexahydro-16-oxa-8-aza-cyclopenta[a]phenanthren-17-one	53.6375	C18H21NO4	90865-79-5	21129.8	315.147
13.6566	2',4,4',6'-Tetramethoxychalcone	52.8245	C19H20O5	25163-67-1	433.623	328.131
35.2877	2,4,6,8,10-Tetradecapentaenoic acid, 9a-(acetyloxy)-1a,1b,4,4a,5,7a,7b,8,9,9a-decahydro-4a,7b-dihydroxy-3-(hydroxymethyl)-1,1,6,8-tetramethyl-5-oxo-1H-cyclopropa[3,4]benz[1,2-e]azulen-9-yl ester, [1aR-(1a.alpha.,1b.beta.,4a.beta.,7a.alpha.,7b.alpha.,8.alpha.,9.beta.,9a.alpha.)]-	50.7163	C36H46O8	77550-17-5	794436	606.319
10.3893	2,4-Dimethyldodecane	82.3293	C14H30	6117-99-3	534420	198.235
33.7204	2',5,8-Trimethoxyisoflavone	51.9912	C18H16O5	1000066-56-4	18387.2	312.1
23.4067	2,5-Bis(5-tert-butyl-2-benzoxazolyl)thiophene	53.1117	C26H26N2O2S	7128-64-5	94875.1	430.172
9.88696	2,5-Di(trifluoromethyl)benzoic acid, 5-pentadecyl ester	56.9584	C24H34F6O2	1000338-71-2	18761.9	468.246
6.55936	2,5-Difluorobenzyl bromide	53.2286	C7H5BrF2	85117-99-3	141824	205.954
31.9618	2,6-Bis(4-nitro-phenylthio)pyridine	55.5157	C17H11N3O4S2	78649-02-2	209952	385.019
7.49812	2,6-Dimethyldecane	85.8271	C12H26	13150-81-7	580523	170.203
6.50143	2,8,9-Trioxa-5-aza-1-silabicyclo[3.3.3]undecane, 1-ethenyl-	61.7021	C8H15NO3Si	2097-18-9	618.138	201.082
29.3046	2-.alpha.-Mannobiose, octakis(trimethylsilyl) ether, methyloxime (isomer 1)	52.134	C37H89NO11Si8	1000380-10-7	58771.9	947.459
23.5975	2-[5-(4-Fluorophenyl)-1,2,4-oxadiazol-3-yl]-4,6-dimethylthieno[2,3-b]pyridin-3-amine	53.1811	C17H13FN4OS	1000387-36-8	135604	340.079
6.36155	2-Acetoxy-4-phenylhex-2-en-5-one	54.5341	C14H16O3	183483-46-7	14441	232.11
7.17766	2-Acetoxyindane	52.7082	C11H12O2	4254-31-3	7646.64	176.084
11.4421	2-Amino1-(4-hydroxyphenyl)-5-phenyl-1H-pyrrole-3,4-dicarbonitrile	51.0408	C18H12N4O	1000327-07-1	81219.6	300.101
17.3165	2-Amino-4-morpholino-6-phenylcarbamoyl-1,3,5-triazine	50.8157	C14H16N6O2	7537-63-5	624.417	300.133
28.8673	2-Benzothiophen-4-one, 4,5,6,7-tetrahydro-1-(1-acetyl-3-pyrazolyl)-6,6-dimethyl-3-methylthio-, oxime-, o-methyl-	53.7538	C17H21N3O2S2	1000267-97-0	10936.6	363.108
31.7285	2-Benzylidene-coumaran-3-one	65.752	C15H10O2	1000403-52-7	355456	222.068
11.8534	2-Butenedioic acid, (E)-, 2TMS derivative	73.1345	C10H20O4Si2	17962-03-7	400380	260.09
33.7321	2-Cyclohexyldimethylsilyloxybut-3-yne	58.432	C12H22OSi	1000299-56-7	212733	210.144
32.8239	2-ethenyl-3-ethylpyrazine	80.756	C8H10N2	1000365-94-4	1.93799e+06	134.084
10.5127	2H-1,2,3-Triazole-4-carboxylic acid, 5-amino-2-phenyl-	51.3953	C9H8N4O2	1000277-23-2	336452	204.065
7.90354	2-Hydroxybutyric acid, 2TMS derivative	55.5263	C10H24O3Si2	55133-93-2	28488.8	248.126
9.06302	2-Methyl-1,4-bis(trimethylsiloxy)butane	57.4464	C11H28O2Si2	105747-05-5	14436.2	248.163
12.0242	2-Methyl-4,5,6,7-tetrahydro-benzofuran-3-carboxylic acid benzo[1,3]dioxol-5-ylamide	61.2968	C17H17NO4	1000295-02-6	846355	299.116
28.7978	2-Monostearin, 2TMS derivative	71.1336	C27H58O4Si2	53336-13-3	204987	502.387
27.0133	2-Palmitoylglycerol, 2TMS derivative	79.0936	C25H54O4Si2	53212-97-8	28763.4	474.356
6.03667	2-Pentanol, 3-methyl-, 2-acetate	63.894	C8H16O2	34860-03-2	199753	144.115
32.9388	2-Phenylindolizine	50.5897	C14H11N	25379-20-8	213832	193.089
28.9659	2-propenoic acid, 3-[4-[bis(4-methylphenyl)amino]phenyl]-2-cyano-, ethyl ester	59.0881	C26H24N2O2	1000398-91-1	144222	396.184
9.12413	2-Undecenoic acid, TMS derivative	52.8272	C14H28O2Si	1000079-43-8	660.631	256.186
13.747	3(4H)-Dibenzofuranone, 4a,9b-dihydro-6-(6-hydroxy-m-tolyl)-8,9b-dimethyl-	56.2374	C21H20O3	21272-73-1	245702	320.141
26.4956	3-(5-Nitro-1,3-dioxo-1,3-dihydro-isoindol-2-yl)-propionic acid	51.0239	C11H8N2O6	1000317-59-9	135526	264.038
25.2521	3,19:14,15-Diepoxypregnan-20-one, 3,11,18-triacetoxy-	53.5604	C27H36O9	1000197-28-0	291497	504.236
11.1665	3,3',4,4'-Tetramethoxystilbene	55.8455	C18H20O4	5385-62-6	235736	300.136
29.81	3,4-Dihydroxymandelic acid, 4TMS derivative	51.0156	C20H40O5Si4	37148-65-5	75468.8	472.195
12.4823	3,5,7-Trihydroxy-4'-methoxyflavone	55.0927	C16H12O6	491-54-3	77680.3	300.063
27.213	3,5-Dihydroxy-4'-methoxydiphenyl	52.0367	C13H12O3	54960-96-2	11261.9	216.079
14.8463	3,5-di-tert-Butyl-4-hydroxyphenylpropionic acid	79.327	C17H26O3	20170-32-5	8.88279e+06	278.188
14.2596	3,7-dioxa-2,8-disilanonane, 2,2,8,8-tetramethyl-5,5-bis[[(trimethylsilyl)oxy]methyl]-	72.1437	C17H44O4Si4	1000402-79-1	379421	424.232
16.7982	3-Benzyl-5-trifluoromethylthiazolidine-2-thione	55.5921	C11H10F3NS2	186791-25-3	63180.5	277.021
8.49924	3-Hydroxybutyric acid, 2TMS derivative	79.7944	C10H24O3Si2	55133-94-3	408243	248.126
33.691	3-Iodo-thieno(2,3-b)quinoline	57.2073	C11H6INS	75703-75-2	395201	310.927
8.01547	3-Methyl-5-methoxymethyl-1,2-oxazole	54.8693	C6H9NO2	13999-31-0	52664.5	127.063
15.1926	4-(4-Methyl-1,3-dioxo-1,3,3a,4,7,7a-hexahydroisoindol-2-yl)-benzoic acid, 1-methyl-2-oxo-2-phenylethyl ester	55.2071	C25H23NO5	1000310-56-6	76257.7	417.158
21.6719	4-(9-Acridinyl)-N,N,3-trimethylbenzenamine	51.7942	C22H20N2	35586-79-9	44984.4	312.163
10.5804	4,5-Bis(methylamino)-fluorene	65.9863	C15H16N2	122779-23-1	19407.9	224.131
16.8933	4'-Amino-4-diethylaminochalcone	51.1673	C19H22N2O	1000110-32-3	510.933	294.173
22.4605	4-Aminomethylcyclohexane carboxylic acid, N,N-bis(trimethylsilyl)-, trimethylsilyl ester	60.0912	C17H39NO2Si3	1000386-64-2	146419	373.229
21.6704	4-Benzo[b]thien-2-yl-2-chloro-6-(2-furanyl)pyrimidine	59.3319	C16H9ClN2OS	124959-39-3	103784	312.012
35.2503	4-benzoxazolol, 2-[4-(pentyloxy)phenyl]-	51.311	C18H19NO3	1000397-44-6	57947.4	297.136
14.8319	4-Fluoro-2-trifluoromethylbenzoic acid, 3-methylbutyl-2 ester	50.8253	C13H14F4O2	1000357-27-4	214451	278.093
7.93714	4-Formyl-3,5-dimethyl-1H-pyrrole-2-carbonitrile	65.8627	C8H8N2O	1000296-05-3	376893	148.064
15.368	4H-1-Benzopyran-4-one, 2,3-dihydro-5,7-dimethoxy-2-phenyl-	51.2815	C17H16O4	1036-72-2	448.488	284.105
23.8486	4H-1-Benzopyran-4-one, 3-(3,4-dimethoxyphenyl)-6,7-dimethoxy-	72.0589	C19H18O6	24126-93-0	10210.9	342.11
14.3381	4-Hexenoic acid, 5-amino-3-oxo-, methyl ester	63.3753	C7H11NO3	52812-86-9	820419	157.074
28.9894	4-Hydroxyanthraquinone-2-carboxylic acid, di-TMS	51.3721	C21H24O5Si2	1000103-01-3	18777.1	412.116
28.3007	4-Hydroxybenzyl alcohol, 2TBDMS derivative	61.4747	C19H36O2Si2	1000364-43-9	317696	352.225
20.9927	4-Hydroxybenzyl alcohol, 2TBDMS derivative	56.6028	C19H36O2Si2	1000364-43-9	238598	352.225
27.0417	4-Hydroxybenzyl alcohol, 2TBDMS derivative	50.59	C19H36O2Si2	1000364-43-9	538011	352.225
31.918	4-Hydroxybenzyl alcohol, 2TBDMS derivative	61.7569	C19H36O2Si2	1000364-43-9	526859	352.225
29.4324	4-Methyltetrahydro-1,3-oxazine-2-thione	60.5736	C5H9NOS	14760-60-2	169813	131.04
5.711	4-Methylurazole	70.6516	C3H5N3O2	16312-79-1	314491	115.038
6.2836	4-Pyridinol, TMS derivative	68.9539	C8H13NOSi	1000352-50-3	348548	167.077
17.2347	5,5,7,7-Tetraethylundecane	51.1458	C19H40	1000360-42-0	41907	268.313
12.9775	5,5-Diethyltridecane	55.6757	C17H36	1000360-41-3	75402.9	240.282
22.7883	5,7-Dihydroxy-3,6,8-trimethoxyflavone	50.7243	C18H16O7	71479-92-0	3478.49	344.09
9.36072	5-Ethoxy-4,5-dihydro-1,2-oxazole-3-carbohydrazide	58.8093	C6H11N3O3	1000410-86-4	90937	173.08
22.8846	5-Fluoro-2-phenylpyrimidine	50.3638	C10H7FN2	54376-51-1	234271	174.059
10.7714	5H-1-Benzazepin-5-one, 1,2,3,4-tetrahydro-1-[(4-methylphenyl)sulfonyl]-	51.2939	C17H17NO3S	24310-36-9	27440.2	315.093
5.62958	5-Methoxyindane	52.8576	C10H12O	1000342-73-8	14521.6	148.089
31.971	6-(4-Fluoro-phenyl)-benzo[4,5]imidazo[1,2-c]quinazoline	72.5202	C20H12FN3	70371-91-4	91012.4	313.102
27.9386	6,7-Dimethoxy-2-[(pyrimidin-2-yl)amino]-3H-quinazolin-4-one	52.1065	C14H13N5O3	1000388-64-7	52900	299.102
19.4244	6.beta.-Hydroxy-6.alpha.-pentyl-3-oxa-a-homo-5.alpha.-androstane-4,17-dione	50.8108	C24H38O4	1000074-88-2	29059.2	390.277
11.028	6-Amino-2,4-dimethyl-5,7-diazabenzofuran	63.0281	C8H9N3O	22727-43-1	186258	163.075
10.4492	6-Chloro-2-ethyl-4-phenylquinoline	51.3731	C17H14ClN	22609-10-5	522615	267.081
19.5178	6H-[1,2]Dioxeto[3',4':4,5]furo[3,2-g][1]benzopyran-6-one, 2a,9b-dihydro-2a,8,9b-trimethyl-	55.3362	C14H12O5	129812-24-4	127583	260.068
23.5557	6H-[1,3]Dioxolo[5,6]benzofuro[3,2-c][1]benzopyran-2-ol, 6a,12a-dihydro-3-methoxy-, (6ar-cis)-	52.5034	C17H14O6	30461-92-8	7.24229e+06	314.079
33.0661	6H-Dibenzo[a,g]quinolizine, 5,8,13,13a-tetrahydro-2,3-dimethoxy-, (.+/-.)-	53.2038	C19H21NO2	47206-72-4	164107	295.157
12.6877	6-Methoxy thymyl tiglate	51.2614	C16H22O3	1000413-80-5	66028.2	262.157
10.8172	6-Methoxy-2-(1-naphthylmethylene)-3(2H)-benzofuranone	52.8713	C20H14O3	77764-97-7	5541.51	302.094
8.13655	7(8H)-Pteridinone, 4-methyl-	54.6805	C7H6N4O	16041-29-5	509157	162.054
29.0898	7-Chloro-2,3-dihydro-3-(4-N,N-dimethylaminobenzylidene)-5-phenyl-1H-1,4-benzodiazepin-2-one	52.8983	C24H20ClN3O	55056-35-4	10837.6	401.129
16.1967	7-Ethyl-6-tridecanone	52.3865	C15H30O	1000374-10-9	349.488	226.23
19.757	7H-Benz[de]anthracen-7-one	50.4709	C17H10O	1982-05-03	18246	230.073
8.46624	7-Methoxy-2H-1,3-benzodioxole-5-carboxamide	51.4638	C9H9NO4	114426-25-4	45393.1	195.053
11.8188	9(10H)-Acridinone, 1-hydroxy-2,3,4-trimethoxy-10-methyl-	59.8636	C17H17NO5	7008-68-6	1333.95	315.111
18.8334	9(10H)-Acridinone, 1-hydroxy-2,3,4-trimethoxy-10-methyl-	51.945	C17H17NO5	7008-68-6	2772.13	315.111
16.1236	9-(2-p-Tolylethyl)-3,4,5,6,7,9-hexahydro-2H-xanthene-1,8-dione	59.5863	C22H24O3	299945-39-4	41388.9	336.173
19.6963	9,10-Anthracenedione, 1-amino-4-bromo-	50.7184	C14H8BrNO2	81-62-9	38338.3	300.974
23.511	9,12-Octadecadienoic acid (Z,Z)-, TMS derivative	77.6709	C21H40O2Si	56259-07-5	178706	352.28
22.2227	9H-Xanthen-9-one, 1-hydroxy-3,5,6-trimethoxy-	59.0991	C16H14O6	4090-62-4	90418.5	302.079
23.6522	9-Octadecenoic acid, (E)-, TMS derivative	59.7002	C21H42O2Si	96851-47-7	163358	354.295
8.08005	Acetaldehyde, chlorodifluoro-	61.4641	C2HClF2O	811-96-1	42229.1	113.968
19.7291	Acetic acid, hydrazide	54.5409	C2H6N2O	1068-57-1	4.02024e+06	74.048
5.29766	Acetic acid, rubidium salt	60.8448	C2H3O2Rb	563-67-7	126723	143.925
23.9324	Acetyldihydrocodeine	51.0907	C20H25NO4	3861-72-1	85973.8	343.178
29.1987	Acridin-9-yl-(4-octyloxy-phenyl)-amine	50.0197	C27H30N2O	1000317-46-8	62195.5	398.236
22.8388	Adipic acid, 2,4-dimethylpent-3-yl undecyl ester	50.0931	C24H46O4	1000353-52-8	904.142	398.34
10.4727	Alanine, N-methyl-n-butoxycarbonyl-, octadecyl ester	66.0073	C27H53NO4	1000329-38-2	1.23186e+06	455.397
23.5479	Androstan-17-one, 3-[(tripropylsilyl)oxy]-, (3.beta.,5.alpha.)-	65.8457	C28H50O2Si	65598-89-2	42890.3	446.358
19.7236	Anhydro 5-mercapto-3-methyl-1,2,3,4-oxatriazolium hydroxide	55.0746	C2H3N3OS	1000256-13-4	5.945e+06	117
25.178	Arachidonic acid, TMS derivative	79.1284	C23H40O2Si	113516-18-0	1.26872e+06	376.28
14.5337	Aspartic acid, N-trimethylsilyl-, bis(trimethylsilyl) ester	67.5865	C13H31NO4Si3	1000386-64-0	454402	349.156
8.95319	Benzaldehyde, 2,4-dihydroxy-3,6-dimethyl-	61.5649	C9H10O3	34883-14-2	64099.9	166.063
32.4123	Benzamide, 2,4,5-trifluoro-3-methoxy-N-(3-methylbutyl)-	67.1105	C13H16F3NO2	1000407-63-9	343100	275.113
10.6699	Benzamide, 4-ethoxy-N-(2-methyl-4-nitrophenyl)-	55.1795	C16H16N2O4	1000317-33-1	1059.97	300.111
30.0818	Benzamide, 4-ethyl-N-(2,4-dimethoxyphenyl)-	53.2299	C17H19NO3	1000340-35-3	12305.2	285.136
10.9492	Benzamide, N-(4-ethoxyphenyl)-3-methyl-4-nitro-	54.3015	C16H16N2O4	1000319-19-1	77658.4	300.111
11.0978	Benzamide, N-(4-ethoxyphenyl)-3-methyl-4-nitro-	62.8179	C16H16N2O4	1000319-19-1	89613.4	300.111
22.7419	benzenamine, 4,4'-[9,10-anthracenediyldi-2,1-ethenediyl]bis[N,N-diethyl-	50.6358	C38H40N2	1000402-94-6	2149.28	524.319
13.4078	benzenamine, 4-ethenyl-N,N-bis(4-methylphenyl)-	69.3462	C22H21N	1000402-13-9	38914.6	299.167
34.7031	benzenamine, N,N-dibutyl-3-methyl-4-nitro-	50.5911	C15H24N2O2	1000401-62-4	403845	264.184
26.4346	benzene, 1,1'-methylenebis[3-(1,1-dimethylethyl)-5-methyl-4-[(trimethylsilyl)oxy]-	63.2359	C29H48O2Si2	1000399-56-2	1.51477e+06	484.319
8.33536	Benzene, 1-isocyano-3-methyl-	54.559	C8H7N	20600-54-8	16109.5	117.058
22.2298	Benzimidazole, 5-iodo-2-methyl-	50.4835	C8H7IN2	2818-70-4	86744.6	257.965
19.1032	Benzo[1,2-b:5,4-b']bisbenzofuran	62.7895	C18H10O2	241-36-1	693924	258.068
16.7153	Benzo[2,1-b:3,4-b']bis[1]benzothiophene	51.5745	C18H10S2	222-24-2	2960.96	290.022
14.1518	Benzoic acid, 2-acetyl-3-methoxy-	75.6922	C10H10O4	120714-42-3	378717	194.058
10.7992	Benzoic acid, 4-(dimethylamino)-	61.1877	C9H11NO2	619-84-1	83275	165.079
7.08054	Bis-(1,7-diazabicyclo[2.2.0]hept-7-yl)methane	56.1523	C11H20N4	1000284-25-2	115657	208.169
16.864	Bisphenol A monomethyl ether, TMS derivative	56.0322	C19H26O2Si	1000283-55-5	1512.94	314.17
14.4764	Bisphenol A monomethyl ether, TMS derivative	57.8731	C19H26O2Si	1000283-55-5	55949.5	314.17
28.0814	Bisphenol A monomethyl ether, TMS derivative	61.6377	C19H26O2Si	1000283-55-5	58645.5	314.17
24.1968	Butabarbital, 2TMS derivative	56.0457	C16H32N2O3Si2	52937-66-3	93892.3	356.195
22.9712	Butane-1,3-dione, 4,4,4-trifluoro-1-(4-imidazol-1-ylphenyl)-	63.6698	C13H9F3N2O2	1000303-12-7	633109	282.062
11.2255	Butanedioic acid, 2TMS derivative	78.7632	C10H22O4Si2	40309-57-7	916808	262.106
11.9182	Butylphosphonic acid, 4-(2-phenylprop-2-yl)phenyl propyl ester	64.4665	C22H31O3P	1000323-09-1	41451.6	374.201
34.7113	Butylphosphonic acid, 4-methylaminophenyl octyl ester	54.4571	C19H34NO3P	1000323-03-3	184614	355.228
6.32384	Butyrovanillone	53.6764	C11H14O3	64142-23-0	30820.2	194.094
7.07295	Carbonic acid, allyl 2-ethylhexyl ester	53.8416	C12H22O3	1000357-80-6	38994.2	214.157
32.3812	Cholesterol, TMS derivative	79.0827	C30H54OSi	1856-05-9	1.95989e+06	458.394
22.2423	Conanine, (5.alpha.)-	52.367	C22H37N	468-33-7	5312.99	315.293
17.0077	Coumachlor	50.4929	C19H15ClO4	81-82-3	22900.2	342.066
21.8648	Cyclodecasiloxane, eicosamethyl-	68.9457	C20H60O10Si10	18772-36-6	439336	740.188
24.8517	Cyclodecasiloxane, eicosamethyl-	77.2729	C20H60O10Si10	18772-36-6	412381	740.188
28.684	Cyclodecasiloxane, eicosamethyl-	68.4293	C20H60O10Si10	18772-36-6	888753	740.188
29.81	Cyclodecasiloxane, eicosamethyl-	65.1879	C20H60O10Si10	18772-36-6	79017	740.188
20.1504	Cyclodecasiloxane, eicosamethyl-	78.8198	C20H60O10Si10	18772-36-6	682286	740.188
30.8556	Cyclodecasiloxane, eicosamethyl-	72.047	C20H60O10Si10	18772-36-6	296329	740.188
6.23973	Cyclohept[b]indol-6(5H)-one, 2-cyclohexyl-7,8,9,10-tetrahydro-, oxime	52.6939	C19H24N2O	339284-86-5	130700	296.189
18.2736	Cyclononasiloxane, octadecamethyl-	77.9792	C18H54O9Si9	556-71-8	410629	666.169
23.4099	Cyclononasiloxane, octadecamethyl-	56.0711	C18H54O9Si9	556-71-8	487322	666.169
16.1748	Cyclooctasiloxane, hexadecamethyl-	77.0726	C16H48O8Si8	556-68-3	187049	592.15
6.34326	Cyclopentadienylmanganesestyrylidenedicarbonyl	50.0927	C15H11MnO2	60039-69-2	741.7	278.014
8.04927	Cyclopentasiloxane, decamethyl-	55.7861	C10H30O5Si5	541-02-6	38339.6	370.094
19.5139	D-(-)-Fructose, pentakis(trimethylsilyl) ether, methyloxime (syn)	70.047	C22H55NO6Si5	1000380-19-0	553957	569.288
6.67502	D-(-)-Lactic acid, 2TMS derivative	90.9646	C9H22O3Si2	1000333-99-1	4.66137e+07	234.111
26.5004	D-(-)-Ribofuranose, tetrakis(trimethylsilyl) ether (isomer 2)	67.5424	C17H42O5Si4	1000380-11-7	321431	438.211
19.9571	D-(+)-Talose, pentakis(trimethylsilyl) ether, methyloxime (anti)	85.4672	C22H55NO6Si5	1000380-18-8	3.01931e+07	569.288
19.743	D-(+)-Talose, pentakis(trimethylsilyl) ether, methyloxime (syn)	69.2782	C22H55NO6Si5	1000380-18-7	2.24128e+07	569.288
19.5755	D-(+)-Talose, pentakis(trimethylsilyl) ether, methyloxime (syn)	86.4645	C22H55NO6Si5	1000380-18-7	2.84397e+06	569.288
19.7152	D-Allose, pentakis(trimethylsilyl) ether, methyloxime (syn)	73.7404	C22H55NO6Si5	1000380-19-7	3.24897e+07	569.288
16.8039	D-Arabinose, tetrakis(trimethylsilyl) ether, ethyloxime (isomer 2)	85.2841	C19H47NO5Si4	1000394-64-9	1.56996e+06	481.253
19.396	D-Fructose, 1,3,4,5,6-pentakis-O-(trimethylsilyl)-, O-methyloxime	76.0001	C22H55NO6Si5	56196-14-6	409027	569.288
20.7522	D-Glucopyranose, 5TMS derivative	78.0283	C21H52O6Si5	19126-99-9	935840	540.261
16.9803	Dibenz[b,d]cycloheptanol, 2,3,9-trimethoxy-	50.2673	C18H20O4	145068-62-8	69726	300.136
28.5957	Dibenzo[h,vwx]hexaphene	68.6945	C32H18	1178-97-8	114167	402.141
33.6995	Didecylisobutylamine	52.7875	C24H51N	1000310-32-4	15932.8	353.402
9.33853	diindolo[3,2-b:3',2'-m]triphenodioxazine, 5,15-diethyl-5,15-dihydro-8,18-bis(2-methoxyphenoxy)-	58.2508	C48H36N4O6	1000400-02-7	1502.38	764.263
11.8899	Dimethyl 2,2'-diaminobiphenyl-4,4'-dicarboxylate	53.8958	C16H16N2O4	23933-57-5	46599.3	300.111
8.14427	Disiloxane, ethylpentamethyl-	63.9072	C7H20OSi2	6231-60-3	7.93359e+06	176.105
23.6676	Diundecylneopentylamine	51.9007	C27H57N	1000310-41-6	107520	395.449
28.6389	D-Lactose, octakis(trimethylsilyl) ether, methyloxime (isomer 1)	82.1624	C37H89NO11Si8	1000380-10-3	7.20929e+06	947.459
28.8776	D-Lactose, octakis(trimethylsilyl) ether, methyloxime (isomer 1)	83.6682	C37H89NO11Si8	1000380-10-3	4.54173e+06	947.459
25.5509	D-Myo-Inositol, 1,2,4,5,6-pentakis-O-(trimethylsilyl)-, bis(trimethylsilyl) phosphate	84.4104	C27H69O9PSi7	55568-91-7	3.4586e+06	764.306
9.31274	Dodecane	87.663	C12H26	112-40-3	984285	170.203
5.94327	Dodecane	64.3895	C12H26	112-40-3	1479.15	170.203
10.229	Dodecane, 4,6-dimethyl-	60.4517	C14H30	61141-72-8	294235	198.235
6.77437	Dodecane, 4,6-dimethyl-	64.6791	C14H30	61141-72-8	17470.4	198.235
7.59914	Dodecane, 5-methyl-	72.626	C13H28	17453-93-9	49991.4	184.219
9.28112	d-Proline, N-methoxycarbonyl-, methyl ester	63.5744	C8H13NO4	1000320-78-5	129485	187.084
18.7448	D-Psicose, pentakis(trimethylsilyl) ether, ethyloxime (isomer 1)	62.368	C23H57NO6Si5	1000394-64-2	239852	583.303
20.2065	D-Sorbitol, 6TMS derivative	76.2671	C24H62O6Si6	1000380-14-5	102882	614.316
17.458	D-Threitol, 4TMS derivative	61.3853	C16H42O4Si4	32381-52-5	115975	410.216
28.0256	dylchicine, 3-demethyl-	54.466	C21H23NO6	7336-34-7	129636	385.153
17.2347	Eicosane	79.3961	C20H42	112-95-8	42462.7	282.329
20.0178	Eicosane	65.4964	C20H42	112-95-8	1.01336e+06	282.329
25.9411	Eicosanoic acid, TMS	50.5078	C23H48O2Si	1000414-25-2	6930.07	384.342
30.7777	Estra-1,3,5(10)-trien-17-ol, 2,3-dimethoxy-, acetate, (17.beta.)-	53.7003	C22H30O4	5976-70-5	99341.3	358.214
8.3849	Ethanamine, 2TMS derivative	63.2877	C8H23NSi2	2477-39-6	8048.8	189.137
6.75451	Ethanol, 2-(methylamino)-	51.4316	C3H9NO	109-83-1	38885.6	75.068
10.3802	Ethanolamine, 3TMS derivative	83.0049	C11H31NOSi3	5630-81-9	663767	277.171
5.37791	Ethylene glycol, 2TMS derivative	86.7875	C8H22O2Si2	7381-30-8	1.31838e+06	206.116
11.498	Fluorenone, 2,3,4,7-tetramethoxy-	61.8709	C17H16O5	127825-92-7	44027.6	300.1
9.86711	Fumaric acid, 3,5-difluorophenyl octyl ester	59.5719	C18H22F2O4	1000339-37-4	23999	340.149
21.7345	Fumaric acid, di(2,2,3,3,4,4,5,5-octafluoropentyl) ester	60.4728	C14H8F16O4	1000348-79-7	48144	544.017
19.587	Fumaric acid, monoamide, N-(2,4-dimethoxyphenyl)-, neopentyl ester	50.1163	C17H23NO5	1000357-51-8	33905.1	321.158
19.5544	Fumaric monoamide, N-(2-bromophenyl)-, heptyl ester	63.3019	C17H22BrNO3	1000345-24-8	40115.6	367.078
20.2024	Galactitol, 6TMS derivative	52.0811	C24H62O6Si6	18919-39-6	589658	614.316
21.3419	Glucose, 5TMS derivative	67.5112	C21H52O6Si5	56192-86-0	1.05627e+06	540.261
5.72679	Glutaric acid, 2-ethylhexyl 3,7-dimethyloctyl ester	64.0538	C23H44O4	1000391-48-5	434720	384.324
29.1177	Glycerol monostearate, 2TMS derivative	73.3277	C27H58O4Si2	1188-75-6	3.03837e+06	502.387
10.5063	Glycerol, 3TMS derivative	87.2416	C12H32O3Si3	6787-10-06	8.81514e+06	308.166
11.057	Glycine, 3TMS derivative	91.0632	C11H29NO2Si3	5630-82-0	6.55905e+06	291.151
11.3969	Glycine, N-(3,5-dinitrobenzoyl)-2-phenyl-, (10-undecenyl) ester	52.1684	C26H31N3O7	123362-48-1	45183.1	497.216
19.1582	Glycine, n-butoxycarbonyl-N-ethyl-, pentadecyl ester	51.8791	C24H47NO4	1000323-47-6	54850.7	413.351
11.995	Hasubanan-9-ol, 7,8-didehydro-4,5-epoxy-3-methoxy-17-methyl-, (5.alpha.,9.alpha.,13.beta.,14.beta.)-	50.6874	C18H21NO3	24695-69-0	40117.2	299.152
14.1168	Heneicosane	70.5059	C21H44	629-94-7	652381	296.344
13.6119	Heptadecane	53.7274	C17H36	629-78-7	860.34	240.282
17.1717	Heptadecane, 2,3-dimethyl-	60.4097	C19H40	61868-03-9	251097	268.313
22.7757	Heptadecanoic acid, TMS derivative	80.7987	C20H42O2Si	55517-58-3	8.58505e+06	342.295
6.38392	Heptafluorobutyric acid, 3,5-dimethylphenyl ester	53.354	C12H9F7O2	1000307-62-9	77246.8	318.049
6.78797	Heptane, 4-ethyl-	51.9892	C9H20	2216-32-2	226276	128.157
25.6901	Heptasiloxane, hexadecamethyl-	59.4488	C16H48O6Si7	541-01-5	294476	532.184
22.6866	Heptasiloxane, hexadecamethyl-	58.3437	C16H48O6Si7	541-01-5	344955	532.184
15.8349	Hexadecane	65.677	C16H34	544-76-3	142243	226.266
11.4134	Hexadecane	60.629	C16H34	544-76-3	563331	226.266
10.6152	Hexadecane	74.151	C16H34	544-76-3	1.42387e+06	226.266
28.4067	Hydrocortisone 21-acetate, bis(O-ethyloxime)	52.2805	C27H42N2O6	1000394-54-5	284830	490.304
17.5255	Imidazo[4,5-e][1,4]diazepine-5,8-dione, 2-(benzylamino)-1,4,6,7-tetrahydro-1,4,7-trimethyl-	51.0591	C16H19N5O2	1000142-47-2	540.332	313.154
27.348	Indium tris(acetylacetonate)	52.2448	C15H21InO6	14405-45-9	366338	412.038
27.1737	Inosine, 4TMS derivative	78.3536	C22H44N4O5Si4	1000332-74-7	812824	556.239
33.7486	Iodoferrocene	54.5981	C10H9FeI	1273-76-3	104695	311.91
21.3516	Iron, (.eta.-4-naphthalene)(.eta.-5-pentamethylcyclopentadienyl)-	56.4948	C20H23Fe	1000161-39-4	175153	319.115
10.5998	Isophthalic acid, isobutyl 2-propylphenyl ester	54.9915	C21H24O4	1000356-62-5	59954.1	340.167
10.6835	Kaur-16-en-18-oic acid, 6,7,19-trihydroxy-, .gamma.-lactone, (4.alpha.,6.alpha.,7.beta.)-	64.2396	C20H28O4	7758-47-6	154125	332.199
14.559	L-5-Oxoproline, , 2TMS derivative	88.762	C11H23NO3Si2	30274-77-2	7.99499e+06	273.122
20.4913	Lactulose, octakis(trimethylsilyl) ether, methyloxime (isomer 1)	58.666	C37H89NO11Si8	1000380-09-7	27139.8	947.459
7.45885	L-Alanine, 2TMS derivative	88.0108	C9H23NO2Si2	27844-07-1	3.7646e+06	233.127
20.0689	L-Glucono-1,4-lactone (2S,3R,4S,5S)-, 4TMS derivative	63.7311	C18H42O6Si4	56298-43-2	188638	466.206
16.0286	L-Glutamic acid, 3TMS derivative	74.6203	C14H33NO4Si3	15985-07-6	241122	363.172
10.8416	L-Isoleucine, 2TMS derivative	75.0906	C12H29NO2Si2	7483-92-3	626063	275.174
17.9662	L-Leucine, N-methyl-N-(octyloxycarbonyl)-, dodecyl ester	50.2422	C28H55NO4	1000392-36-5	85568.3	469.413
34.6017	L-Lysine, N6-acetyl-N2-[N-[N-[N-(N2-acetyl-N,N,N2-trimethyl-L-asparaginyl)-N-methyl-L-phenylalanyl]-N-methyl-L-phenylalanyl]-N,1-dimethyl-L-tryptophyl]-N2,N6-dimethyl-, methyl ester	50.5174	C53H72N8O9	56818-04-3	89672.5	964.542
31.3466	L-Lysine, N6-acetyl-N2-[N-[N-[N-(N2-acetyl-N,N,N2-trimethyl-L-asparaginyl)-N-methyl-L-phenylalanyl]-N-methyl-L-phenylalanyl]-N,1-dimethyl-L-tryptophyl]-N2,N6-dimethyl-, methyl ester	52.9367	C53H72N8O9	56818-04-3	184627	964.542
14.7504	l-Norvaline, N-(2-methoxyethoxycarbonyl)-, hexadecyl ester	51.9065	C25H49NO5	1000328-64-7	222858	443.361
14.8925	L-Proline, N-(pentafluorobenzoyl)-, hexadecyl ester	54.3114	C28H40F5NO3	1000346-30-5	6079.67	533.293
11.7245	L-Proline, N-pivaloyl-, undecyl ester	53.5492	C21H39NO3	1000346-36-1	28824.7	353.293
12.391	L-Threonic acid, tris(trimethylsilyl) ether, trimethylsilyl ester	50.4366	C16H40O5Si4	1000352-53-3	242636	424.195
12.3798	L-Threonine, 3TMS derivative	83.9296	C13H33NO3Si3	7537-02-02	77218.2	335.177
9.48532	L-Valine, 2TMS derivative	85.9791	C11H27NO2Si2	7364-44-5	1.05999e+06	261.158
14.0267	Malic acid, 3TMS derivative	85.7183	C13H30O5Si3	38166-11-9	203370	350.14
28.4705	Maltose, 8TMS derivative	53.5654	C36H86O11Si8	33428-94-3	17802.3	918.432
28.3331	Maltose, octakis(trimethylsilyl) ether, methyloxime (isomer 1)	74.3322	C37H89NO11Si8	1000380-10-1	424487	947.459
14.6466	m-Cresol, TMS derivative	61.0968	C10H16OSi	17902-31-7	43543.5	180.097
10.6591	Methanimidamide, N,N-dimethyl-N'-(4-nitrophenyl)-	52.3892	C9H11N3O2	1205-59-0	74945.7	193.085
33.1904	Methyl 15-methyl-3-(trimethylsilyloxy)hexadecanoate	50.6804	C21H44O3Si	1000383-88-4	136148	372.306
27.4871	Methyl 2-((1,2,4)triazolo(1,5-a)quinolin-2-yl)-4-quinolinecarboxylate	55.8882	C21H14N4O2	7170-26-5	260835	354.112
23.8855	Methyl 2,6-dihydroxybenzoate, 2TMS derivative	60.399	C14H24O4Si2	27798-57-8	278459	312.121
33.8145	Methyl 2-[2-(4-chlorophenyl)-5-methyl-1H-imidazol-1-yl]dithiobenzoate	53.2276	C18H15ClN2S2	105251-31-8	348792	358.037
10.2019	Methylergonovine	51.6384	C20H25N3O2	113-42-8	25195.5	339.195
26.0472	Myo-Inositol, 1,3,4,5,6-pentakis-O-(trimethylsilyl)-, bis(trimethylsilyl) phosphate	73.0092	C27H69O9PSi7	33910-06-4	406070	764.306
22.0596	Myo-Inositol, 6TMS derivative	87.1733	C24H60O6Si6	2582-79-8	562855	612.301
19.2025	Myristic acid, TMS derivative	50.8694	C17H36O2Si	18603-17-3	523381	300.248
7.86091	N-(2-([(4-Chlorophenyl)carbamoyl]amino)-6-methylphenyl)-2-methylpropanamide	51.5274	C18H20ClN3O2	1000387-70-3	372.221	345.124
24.6664	N'-(2,4-Dichlorobenzylidene)-9-fluorenecarbohydrazide	53.6156	C21H14Cl2N2O	1000223-98-7	189313	380.048
21.757	N-(p-Methoxybenzylidene)-p-styrylaniline	57.0261	C22H19NO	322413-12-7	173781	313.147
28.3461	N,N'-Ethylenebis(1,1,1-trifluoro-4-iminopentan-2-onato)palladium(ii)	63.0472	C12H12F6N2O2Pd	40792-96-9	117450	435.984
13.7435	N,O-Bis(tert-butyldimethylsilyl)carbamate	65.8584	C13H31NO2Si2	1000366-61-2	483394	289.189
21.9066	N-Acetyl-D-glucosamine, tetrakis(trimethylsilyl) ether, methyloxime (syn)	76.7373	C21H50N2O6Si4	1000380-19-3	146844	538.275
25.536	N-Acridin-9-yl-N'-(3-chloro-phenyl)-hydrazine	54.5254	C19H14ClN3	1000317-41-3	54746.2	319.088
15.4716	Naphtho[1,8-de]-1,3-dioxin-2-one	57.6481	C11H6O3	29788-37-2	888984	186.032
10.0202	Neopentyl 2-methylbutanoate	56.233	C10H20O2	1000372-69-9	45910.7	172.146
22.5406	Octadecane, 3-ethyl-5-(2-ethylbutyl)-	57.84	C26H54	55282-12-7	139125	366.423
5.29363	Octane, 2-methyl-	57.895	C9H20	3221-61-2	213683	128.157
6.68475	Octane, 5-ethyl-2-methyl-	83.5164	C11H24	62016-18-6	2.1218e+06	156.188
23.5808	Oleic Acid, (Z)-, TMS derivative	69.2594	C21H42O2Si	21556-26-3	259479	354.295
14.0555	Oxalic acid, heptadecyl hexyl ester	51.7048	C25H48O4	1000309-25-1	1615.83	412.355
21.6348	Palmitic Acid, TMS derivative	85.9579	C19H40O2Si	55520-89-3	2.89108e+07	328.28
12.9046	Pentadecane	59.2433	C15H32	629-62-9	58723	212.25
8.84026	Pentadecane	66.6206	C15H32	629-62-9	542591	212.25
6.04191	Pentanamide, 2-amino-4-methyl-, (S)-	68.3724	C6H14N2O	687-51-4	116717	130.111
8.61931	Pentasiloxane, dodecamethyl-	78.4673	C12H36O4Si5	141-63-9	115499	384.146
10.4408	Phenanthrene-10-ethanamine, 3-bromo-.beta.-hydroxy-N,N-diheptyl-, O,O-diphenylphosphate	54.353	C42H51BrNO4P	42585-80-8	49524	743.274
22.7836	Phenoxarsine, 10-(p-chlorophenoxy)-	54.4186	C18H12AsClO2	27796-63-0	129389	369.974
17.4658	Phosphoric acid, 2-(trimethylsiloxy)-1-[(trimethylsiloxy)methyl]ethyl bis(trimethylsilyl) ester	69.7265	C15H41O6PSi4	31038-12-7	208249	460.172
17.9741	Phosphoric acid, bis(trimethylsilyl) 2,3-bis[(trimethylsilyl)oxy]propyl ester	83.5998	C15H41O6PSi4	31038-11-6	554210	460.172
8.8023	Phosphoric acid, bis(trimethylsilyl)monomethyl ester	78.4817	C7H21O4PSi2	18291-81-1	1.16577e+06	256.072
18.2547	Phosphorylethanolamine, 4TMS derivative	74.7177	C14H40NO4PSi4	55334-92-4	526085	429.177
5.38684	Phthalic acid, 5-methoxy-3-methylpentyl tridecyl ester	50.8126	C28H46O5	1000314-89-4	45220.3	462.335
28.3257	Phthalic acid, tetradecyl 2,4,4-trimethylpentyl ester	50.5061	C30H50O4	1000377-78-0	102421	474.371
15.7386	piperazine, 1,4-bis(2-ethylhexyl)-	69.4339	C20H42N2	1000397-69-2	426583	310.335
26.9333	Piperazine, 1-[5-fluoropentyl]-4-[(3,4-dichlorophenyl)acetyl]-	53.5101	C17H23Cl2FN2O	141044-94-2	238591	360.117
19.7369	Propane, 2,2',2''-[methylidynetris(oxy)]tris-	52.2309	C10H22O3	4447-60-3	80836	190.157
5.61379	Propylene glycol, 2TMS derivative	50.1627	C9H24O2Si2	17887-27-3	144890	220.131
20.1948	Pyrazol-3(3H)-one, 4-(2-methoxyphenylmethylidenamino)-1,5-dimethyl-2-phenyl-1,2-dihydro-	52.0726	C19H19N3O2	61098-07-5	46524.4	321.148
35.0743	Pyrazole-3-carboxamide, N-phenyl-1-methyl-	51.5716	C11H11N3O	89202-82-4	81336.8	201.09
33.3142	Pyrazolo[3,4-b]pyridin-6-one, 1-(1-ethylpropyl)-3-hydroxy-4-methyl-1,7-dihydro-	52.9338	C12H17N3O2	1000316-40-3	74928.8	235.132
5.18207	Pyridine	52.0709	C5H5N	110-86-1	95377	79.042
11.3253	Pyridine, 2-(2-phenylethenyl)-	50.1871	C13H11N	714-08-9	43819.8	181.089
20.2185	Pyridine, 3-methyl-2,6-diphenyl-	52.793	C18H15N	28489-52-3	145220	245.12
19.9311	Quinoline, 4-methyl-2-phenyl-	63.0591	C16H13N	4789-76-8	35829.1	219.105
14.5168	S-(2-Aminoethyl) o-(p-chlorophenyl) thiocarbonate	56.4704	C9H10ClNO2S	1000240-62-4	16007	231.012
22.6006	Sedoheptulose, o-methyloxime, hexakis-O-(trimethylsilyl)-	57.6421	C26H65NO7Si6	1000298-66-2	205517	671.338
11.9708	Serine, 3TMS derivative	82.4827	C12H31NO3Si3	64625-17-8	674908	321.161
8.53841	Silane, cyclohexyldimethoxymethyl-	88.4723	C9H20O2Si	17865-32-6	934522	188.123
21.3352	Silane, diethyl(2-methylpent-3-yloxy)propoxy-	53.3602	C13H30O2Si	1000363-77-2	73830	246.202
22.8543	Silane, diethylbutoxy(pentafluorobenzyloxy)-	55.7649	C15H21F5O2Si	1000363-22-1	29624.4	356.123
25.58	Silane, diethyldecyloxyoctyloxy-	53.8557	C22H48O2Si	1000363-08-0	38314.7	372.342
25.4485	Silane, diethyldodecyloxyhexyloxy-	60.8428	C22H48O2Si	1000363-74-0	88948.3	372.342
13.9203	Silane, diethylheptadecyloxy(2-phenylethoxy)-	59.3579	C29H54O2Si	1000363-17-2	44183.7	462.389
10.6976	Silane, diethylhexyloxynonyloxy-	56.1353	C19H42O2Si	1000363-73-7	78295.2	330.295
27.1605	Silane, diethylnonyloxypropoxy-	53.1134	C16H36O2Si	1000363-08-5	225302	288.248
28.8956	Silane, dimethyl(1-phenylpropoxy)tridecyloxy-	66.8174	C24H44O2Si	1000347-28-2	15396	392.311
20.8144	Silane, dimethyl(2-naphthoxy)tetradecyloxy-	62.2633	C26H42O2Si	1000347-22-0	10192.6	414.295
33.2023	Silane, dimethyl(4-(2-phenylprop-2-yl)phenoxy)pentyloxy-	64.3234	C22H32O2Si	1000347-18-9	132459	356.217
26.4379	Silane, dimethyl(4-bromophenoxy)heptadecyloxy-	50.2856	C25H45BrO2Si	1000347-11-9	479465	484.237
11.0062	Silane, dimethyl(dimethyl(dimethyl(2-isopropylphenoxy)silyloxy)silyloxy)(2-isopropylphenoxy)-	52.6632	C24H40O4Si3	1000347-25-6	75819.8	476.223
16.2222	Silane, dimethyl(pentafluorobenzyloxy)propoxy-	57.8965	C12H15F5O2Si	1000347-25-8	77213.1	314.076
21.7087	Silane, dimethyldi(4-acetylphenoxy)-	56.1542	C18H20O4Si	1000347-31-7	161975	328.113
10.6466	Silanol, trimethyl-, phosphate (3:1)	72.9234	C9H27O4PSi3	10497-05-9	82382.1	314.095
10.4552	Silanol, trimethyl-, phosphate (3:1)	82.9906	C9H27O4PSi3	10497-05-9	1.11888e+07	314.095
33.7386	Spiro[5H-dibenzo[a,d]cycloheptene-5,1'-[1H]isoindole], 2',3',10,11-tetrahydro-2'-methyl-	53.0447	C23H21N	35926-76-2	1.24337e+06	311.167
23.8727	Stearic acid, TMS derivative	87.4332	C21H44O2Si	18748-91-9	1.9087e+07	356.311
9.00204	Succinic acid, 3-chlorophenyl 2-fluoroethyl ester	54.4568	C12H12ClFO4	1000390-88-3	131131	274.041
14.836	Succinic acid, di(4-tert-butylphenyl) ester	52.8484	C24H30O4	1000330-00-6	91483.2	382.214
6.10378	Sulfurous acid, 2-ethylhexyl tridecyl ester	74.6226	C21H44O3S	1000309-19-6	487911	376.301
5.55649	Sydnone, 3-(1,1-dimethylethyl)-	50.0758	C6H10N2O2	6939-25-9	40257.1	142.074
27.4871	Tetracosamethyl-cyclododecasiloxane	65.0728	C24H72O12Si12	18919-94-3	266599	888.226
23.4102	Tetracosamethyl-cyclododecasiloxane	71.649	C24H72O12Si12	18919-94-3	512757	888.226
33.1781	Tetracosamethyl-cyclododecasiloxane	50.7772	C24H72O12Si12	18919-94-3	286581	888.226
17.8211	Tetracosane	58.0159	C24H50	646-31-1	111344	338.391
12.7379	Tetradecane	70.5593	C14H30	629-59-4	729.762	198.235
12.759	Tetradecane	64.7653	C14H30	629-59-4	12630.3	198.235
6.24209	Tetrasiloxane, decamethyl-	65.6537	C10H30O3Si4	141-62-8	505707	310.127
33.568	Thiazolidin-4-one, 2-(4-methylphenylimino)-	53.167	C10H10N2OS	17385-68-1	48181.3	206.051
32.2588	trans-4,4'-Bis(methylthio)chalcone	61.3574	C17H16OS2	33868-48-3	4609.58	300.064
6.00204	Trichloroethanol, TMS derivative	70.3968	C5H11Cl3OSi	41262-38-8	325242	219.964
20.6117	Tridecanoic acid, triethylsilyl ester	51.8277	C19H40O2Si	1000279-44-1	140829	328.28
11.3435	Trisiloxane, octamethyl-	77.3895	C8H24O2Si3	107-51-7	1.79622e+06	236.108
12.778	Tromethamine, 3TMS derivative	59.4464	C13H35NO3Si3	1000366-66-0	23825.9	337.192
9.53145	Undecane, 2,6-dimethyl-	77.7223	C13H28	17301-23-4	222379	184.219
8.66616	Undecane, 2-methyl-	68.5053	C12H26	7045-71-8	806.564	170.203
10.9907	Undecane, 3,8-dimethyl-	57.7381	C13H28	17301-30-3	554.842	184.219
10.1201	Undecane, 3,8-dimethyl-	61.092	C13H28	17301-30-3	215165	184.219
9.69413	Undecane, 4,8-dimethyl-	77.6441	C13H28	17301-33-6	739.69	184.219
11.6052	Uracil, 2TMS derivative	68.9883	C10H20N2O2Si2	10457-14-4	118043	256.106
10.073	Urea, 2TMS derivative	84.2043	C7H20N2OSi2	18297-63-7	4.93422e+06	204.111
25.9637	Uridine, 3TMS derivative	74.5911	C18H36N2O6Si3	10457-16-6	654638	460.188
10.9171	Valine, N-(1-carbethoxy-L-prolyl)-, methyl ester, L-	54.0271	C14H24N2O5	21026-88-0	292507	300.169
17.1937	Xylitol, 5TMS derivative	81.8569	C20H52O5Si5	14199-72-5	227934	512.266

## Sheet: Supplementary table 5
Retention Time (RT)	Metabolites	% similarity	Molecular Formula	CAS Number	Peak Area	Molecular Weight (MW)
5.33807	(.+/-.)-2-Phenylbutyric acid, benzyldimethylsilyl ester	51.5705	C19H24O2Si	1000375-60-7	27017.8	312.155
7.72353	(2S,3R)-3-[(4E,7E)-Nona-4,7-dienoyl]-N,N-bis(trimethylsilyl)oxirane-2-carboxamide	60.2721	C18H33NO3Si2	1000395-61-1	3.26248e+06	367.2
33.704	(7-Ethoxy-9-oxo-9H-fluoren-2-yloxy)-acetic acid, methyl ester	50.266	C18H16O5	1000317-67-9	93598.2	312.1
8.49785	(R)-3-Hydroxybutyric acid, 2TMS derivative	73.8634	C10H24O3Si2	1000332-95-8	277295	248.126
25.1648	(Trifluoromethyl)acetylene	53.9905	C3HF3	661-54-1	276970	94.003
20.0678	.alpha.-D-Glucopyranose, 2,3,4,6-tetrakis-O-(trimethylsilyl)-, bis(trimethylsilyl) phosphate	55.8614	C24H61O9PSi6	55520-79-1	611024	692.267
11.1731	.alpha.-Hydroxystearic acid	53.4716	C18H36O3	1330-70-7	182612	300.266
12.1443	.alpha.-Hydroxystearic acid	51.7335	C18H36O3	1330-70-7	83617.7	300.266
13.0955	.beta.-Alanine, 3TMS derivative	60.218	C12H31NO2Si3	55255-77-1	111743	305.166
24.2449	.beta.-D-Glucopyranuronic acid, 5TMS derivative	62.5003	C21H50O7Si5	52842-24-7	648325	554.24
34.5805	.beta.-Sitosterol, TMS derivative	51.4373	C32H58OSi	2625-46-9	280577	486.426
9.14815	[1,2,4]Triazolo[1,5-a]pyrimidin-7-amine, 6-(4-methoxyphenyl)-	52.2075	C12H11N5O	1000351-09-2	49415	241.096
15.4556	{4-Methoxy-2-[(trimethylsilyl)oxy]phenyl}(4-methylphenyl)methanone	56.2624	C18H22O3Si	1000408-24-6	104406	314.134
32.4437	1-(3-Methylbutyl)-2,3,5-trimethylbenzene	51.7245	C14H22	107997-60-4	5.76813e+07	190.172
24.9027	1-(4-Chlorophenyl)-2-methyl-3-ethoxycarbonyl-5-(4-methoxyphenyl)-pyrrole	54.2375	C21H20ClNO3	83490-99-7	602.609	369.113
6.52589	1-(Piperidin-1-yl)hexadecan-1-one	54.4395	C21H41NO	4629-02-01	1328.89	323.319
21.4042	1,1,2-ethenetricarbonitrile, 2-[4-[bis(4-methylphenyl)amino]phenyl]-	55.5595	C25H18N4	1000398-66-0	1740.58	374.153
15.9766	1,2,3,4-Tetrahydro-1-(4-methoxyphenyl)-2-phenylisoquinoline	50.6319	C22H21NO	59224-75-8	9120.07	315.162
10.0434	1,2,4,5,7-Pentathiocane	52.0692	C3H6S5	81531-39-7	71905	201.907
13.2187	1,2,4-Triazolo[4,3-a]pyridin-3-amine	58.9073	C6H6N4	767-62-4	671.31	134.059
25.5183	1,2-Diiodo-3,4,5,6-tetramethyl-benzene	52.6718	C10H12I2	5503-82-2	22428.3	385.903
10.4611	1,3,2-Dioxarsenane, 2-ethyl-	50.9395	C5H11AsO2	42541-31-1	516618	177.998
28.806	1,3,4-thiadiazol-2-amine, 5-[2-phenylethenyl]-	51.9274	C10H9N3S	1000400-45-7	89257.8	203.052
29.1933	1,3,5,2,4,6-Triazatriphosphorine, 2,4,6-tribromo-2,4,6-trichloro-2,2,4,4,6,6-hexahydro-	60.097	Br3Cl3N3P3	16032-52-3	120067	476.592
32.3595	1,3,5,2,4,6-Triazatriphosphorine, 2,4-dibromo-2,4,6,6-tetrachloro-2,2,4,4,6,6-hexahydro-	53.6108	Br2Cl4N3P3	15964-99-5	93836.6	432.643
32.826	1,3-Benzenediol, o-(4-ethylbenzoyl)-o'-(3-methylbenzoyl)-	71.7485	C23H20O4	1000330-83-6	608872	360.136
33.7993	1,3-Butadiyne, 1-(3-bromophenyl)-4-phenyl-	55.5373	C16H9Br	149543-08-8	71009.1	279.989
17.1793	1,3-Propanediol, ethyl tetradecyl ether	53.0032	C19H40O2	1000406-35-2	15625.7	300.303
20.4373	1,4-benzenediamine, N4-(5-chloro-2-nitrophenyl)-N1,N1-diethyl-	52.0032	C16H18ClN3O2	1000397-84-6	28582.9	319.109
27.7166	1,4-Bis-(benzoxazol-2-yl)naphthalene	50.6962	C24H14N2O2	1000370-31-4	16410.3	362.106
16.7262	10-Cyclohexyl-2,3-dihydro-1H-pyrazino[3,2,1-j,k]carbazole	50.8262	C20H22N2	157056-89-8	37821.2	290.178
21.8047	11-Ethylidene-7-methyl-2-[(trimethylsilyl)oxy]-9,10-dihydro-5,9-methanocycloocta[b]pyridin-5(6H)-amine	56.3505	C18H26N2OSi	1000408-20-4	62389.8	314.181
17.8303	11-Methyltricosane	62.0566	C24H50	27538-41-6	355940	338.391
24.7374	1-Cyano-4-diphenyl(tert-butyl)silyloxybenzene	50.3589	C23H23NOSi	1000307-86-7	34563.4	357.155
10.8498	1-Cyano-4-diphenyl(tert-butyl)silyloxybenzene	76.9883	C23H23NOSi	1000307-86-7	243120	357.155
14.4929	1-Cyano-4-diphenyl(tert-butyl)silyloxybenzene	58.5878	C23H23NOSi	1000307-86-7	25813	357.155
12.2068	1-Cyano-4-diphenyl(tert-butyl)silyloxybenzene	65.6954	C23H23NOSi	1000307-86-7	78868.4	357.155
23.4393	1-Cyano-4-diphenyl(tert-butyl)silyloxybenzene	51.5458	C23H23NOSi	1000307-86-7	53349.4	357.155
11.105	1-Cyano-4-diphenyl(tert-butyl)silyloxybenzene	69.9456	C23H23NOSi	1000307-86-7	67797.5	357.155
23.3686	1-Cyano-4-diphenyl(tert-butyl)silyloxybenzene	57.3904	C23H23NOSi	1000307-86-7	59641.8	357.155
10.6165	1-Cyclohexyldimethylsilyloxyhexadecane	65.9465	C24H50OSi	1000281-96-7	4.50984e+06	382.363
12.5824	1H-Benzimidazole, 2,2'-(2,5-furandiyl)bis-	50.3861	C18H12N4O	4751-41-1	29461.3	300.101
13.0955	1-Hexadecanol, TBDMS derivative	60.2669	C22H48OSi	76358-80-0	58426.1	356.347
20.6069	1-Hexadecanol, TMS derivative	77.8596	C19H42OSi	6221-90-5	122468	314.3
13.7344	1-Hexen, 2-(p-anisyl)-5-methyl-	50.6143	C14H20O	1000149-26-7	133268	204.151
15.3198	1H-Indol-2-one, 2,3-dihydro-1-acetyl-3-(5-methylthio-2-furfurylidene)-	55.5851	C16H13NO3S	64259-23-0	17939.8	299.062
22.7814	1H-Indole, 5,6-dimethoxy-2-(3,5-dimethoxyphenyl)-3-methyl-	55.7171	C19H21NO4	156785-69-2	3.12312e+06	327.147
20.6205	1H-Pyrazole-5-carboxamide, 3-cyclopropyl-1-methyl-N-tricyclo[3.3.1.1(3,7)]dec-1-yl-	59.2323	C18H25N3O	1000350-11-4	77388.7	299.2
25.1882	1H-Pyrrolo[2,3-b]pyridine, 2-(1-methylethyl)-	50.6104	C10H12N2	27257-18-7	99568	160.1
15.024	1-Methyl-N,N-bis(trimethylsilyl)-4-[(trimethylsilyl)oxy]-1H-imidazol-2-amine	81.5331	C13H31N3OSi3	1000333-94-6	429981	329.177
27.3368	1-Monopalmitin, 2TMS derivative	81.2697	C25H54O4Si2	1188-74-5	9.15799e+06	474.356
14.8526	1-Nitro-4-phenoxynaphthalene	53.9509	C16H11NO3	1000110-34-2	49586.5	265.074
26.193	1-octadecanamine, N-octadecyl-	50.659	C36H75N	1000402-94-3	139377	521.59
9.95707	1-Pentanamine, N-pentyl-	51.6665	C10H23N	2050-92-2	1194.35	157.183
6.03141	1-Propanamine, N,2-dimethyl-	67.3049	C5H13N	625-43-4	462642	87.105
6.03138	1-Propanol, 2-(dimethylamino)-2-methyl-	64.4397	C6H15NO	7005-47-2	297915	117.115
7.49159	1-Tetrazol-2-ylethanone	57.1617	C3H4N4O	51410-11-8	408149	112.039
15.3373	1-Tri(isobutyl)silyloxydecane	53.4314	C22H48OSi	1000280-52-6	69010.6	356.347
21.7524	2-(4-Methoxyphenyl)-8-chloro-4H-imidazo(2,1-c)(1,4)benzoxazine	59.4275	C17H13ClN2O2	104971-84-8	74060.1	312.067
33.2173	2-(4-Methylfurazan-3-yliminomethyl)phenol	53.3119	C10H9N3O2	302570-86-1	102998	203.069
8.10136	2-(4-Nitrophenyl)-4-acetyl-thiazole	58.8097	C11H8N2O3S	21160-66-7	56063.2	248.026
33.7972	2,2,2-Trifluoroethanesulfonyl chloride	62.14	C2H2ClF3O2S	1648-99-3	178008	181.942
21.6467	2,2-Bis(4'-methoxyphenyl)-2-ethoxyethane	56.3462	C18H22O3	1000283-53-7	99358.3	286.157
21.6172	2,2-Diphenyl-1,3-dithiane	51.5074	C16H16S2	10359-08-7	48622.3	272.069
5.7029	2,3-Butanedione, mono(O-methyloxime)	57.112	C5H9NO2	617-32-3	129645	115.063
27.3493	2,3-Dihydro-4-methyl-(1H)1,5-benzodiazepine-2-thione	50.6003	C10H10N2S	200264-12-6	395775	190.056
27.1556	2,3-Dimethyl-5-oxo-1-phenyl-3-pyrazolin-4-yl isothiocyanate	52.4228	C12H11N3OS	91397-03-4	258898	245.062
9.18953	2,4-Difluoroiodobenzene	57.2468	C6H3F2I	2265-93-2	51767.5	239.925
30.617	2,4-Dihydroxypropiophenone, 2TMS derivative	52.0586	C15H26O3Si2	55724-93-1	91915.5	310.142
15.4696	2,7-Damino-4-(2,6-difluorophenyl)-4H-chromene-3-carbonitrile	51.5324	C16H11F2N3O	1000409-56-0	82652.1	299.087
6.49271	2,8,9-Trioxa-5-aza-1-silabicyclo[3.3.3]undecane, 1-ethenyl-	61.6141	C8H15NO3Si	2097-18-9	97644.2	201.082
30.2795	2-Amino[1,3]thiazolo[4,5-d]pyrimidine-5,7-diol tritms	50.9408	C14H28N4O2SSi3	1000332-42-0	60839.2	400.124
22.0392	2-Amino-4-[2,3,4-trimethoxyanilino]-5-nitropyrimidine	50.6973	C13H15N5O5	71525-44-5	12393.2	321.107
12.2622	2-Amino-4-morpholino-6-phenylcarbamoyl-1,3,5-triazine	53.6277	C14H16N6O2	7537-63-5	267572	300.133
13.6221	2-Amino-5-(2-hydroxyphenyl)-1-phenyl-1H-pyrrole-3,4-dicarbonitrile	52.2211	C18H12N4O	1000327-02-8	152591	300.101
15.0614	2-Amino-5,6-dichloro-benzothiazole	70.5557	C7H4Cl2N2S	24072-75-1	90011.3	217.947
8.65677	2-Aminocaprylic acid, N-(2-methoxyethylcarbonyl)-, isobutyl ester	55.9204	C16H31NO5	1000327-76-8	71302.5	317.22
5.28498	2-Butene-1,4-diol, (Z)-	60.1735	C4H8O2	6117-80-2	191721	88.052
11.8482	2-Butenedioic acid, (E)-, 2TMS derivative	74.2251	C10H20O4Si2	17962-03-7	175938	260.09
18.6674	2-Chloro-3-(4-hydroxyphenylamino)-1,4-naphthoquinone	52.2857	C16H10ClNO3	64897-00-3	30570.1	299.035
25.3988	2-Cyclopentene-1-carboxylic acid	58.4413	C6H8O2	2348-89-2	69257.9	112.052
13.6399	2-Fluoro-6-trifluoromethylbenzamide, N-(4-methoxyphenyl)-	51.9248	C15H11F4NO2	1000358-11-6	20362.4	313.073
16.0384	2H-1-benzopyran-2-one, 7-(diethylamino)-3-[4-(dimethylamino)benzoyl]-	50.404	C22H24N2O3	1000402-59-3	18441	364.179
9.31618	2H-Imidazole-2-thione, 1,3-dihydro-4-methyl-5-(2-methylpropyl)-	52.5214	C8H14N2S	1000351-66-3	66441.3	170.088
6.56794	2'-Hydroxy-5'-methylacetophenone, TMS derivative	59.2901	C12H18O2Si	97389-69-0	36794.8	222.108
14.1034	2-Hydroxyskatole	51.5014	C9H9NO	1000378-98-6	81496.9	147.068
28.7957	2-Monostearin, 2TMS derivative	72.1935	C27H58O4Si2	53336-13-3	383110	502.387
27.0171	2-Palmitoylglycerol, 2TMS derivative	80.4195	C25H54O4Si2	53212-97-8	271956	474.356
7.1107	2-Phenyl-3-formyl-pyrrole	51.7335	C11H9NO	52179-71-2	5891.94	171.068
34.8219	2-propen-1-one, 1,3-bis[4-[bis(4-methylphenyl)amino]phenyl]-	53.7188	C43H38N2O	1000403-13-0	51735.6	598.298
25.5728	3-(4-Bromophenacyl)-1-methyl-2-indolinone	59.0926	C17H14BrNO2	846-97-9	244727	343.021
33.9357	3-(4-Methoxyphenyl)propylamine, N-pentafluoropropionyl	51.7671	C13H14F5NO2	1000072-00-8	32379.4	311.094
11.1968	3-(Acridin-9-ylamino)-phenol	61.8037	C19H14N2O	51208-19-6	31737.5	286.111
34.52	3-(p-Ethoxyphenyl)-5-phenoxymethyl-2-oxazolidone	51.5503	C18H19NO4	5535-04-06	100457	313.131
16.0047	3,4-Dehydroproline, N-carbo(4-nitrobenzyloxy)-	59.0307	C13H12N2O6	1000132-74-5	30751.8	292.07
14.8441	3,5-di-tert-Butyl-4-hydroxyphenylpropionic acid	79.2909	C17H26O3	20170-32-5	7.20753e+06	278.188
13.0554	3,5-Pyridinedicarboxylic acid, 1,4-dihydro-4-(4-methoxyphenyl)-1,2,6-trimethyl-, diethyl ester	50.3817	C21H27NO5	42972-34-9	73447.6	373.189
11.9159	3,5-Pyridinedicarboxylic acid, 1,4-dihydro-4-(4-methoxyphenyl)-1,2,6-trimethyl-, diethyl ester	51.4557	C21H27NO5	42972-34-9	422.72	373.189
14.2618	3,7-dioxa-2,8-disilanonane, 2,2,8,8-tetramethyl-5,5-bis[[(trimethylsilyl)oxy]methyl]-	66.6608	C17H44O4Si4	1000402-79-1	379738	424.232
33.3356	3-Azabicyclo[3.3.1]nonane-7-carboxamide, N-(2-anthracenyl)-1,5,7-trimethyl-2,4-dioxo-	50.4311	C26H26N2O3	110773-29-0	117882	414.194
7.59983	3-Ethyl-3-methylheptane	67.959	C10H22	17302-01-1	289638	142.172
6.78902	3-Ethyl-3-methylheptane	80.5789	C10H22	17302-01-1	815736	142.172
16.9322	3H-Benzimidazol-7-ol, 3-methyl-2,6-diphenyl-	57.0774	C20H16N2O	313402-81-2	14204.8	300.126
10.1985	3H-indol-3-one, 5-methyl-2-phenyl-	50.5311	C15H11NO	1000396-26-1	47024.8	221.084
11.1259	3-Methyl-3H-naphth[1,2-e]indol-10-ol	55.702	C17H13NO	98033-21-7	85481.1	247.1
28.9779	3-Phenyl-1-p-tolylimino-3-trifluoromethyl-2,3,6,7,8,9-hexahydro-1H,5H-2,4b,10,10a-tetraaza-benzo[a]azulene-4-carbonitrile	60.4985	C25H23F3N6	1000318-49-5	126414	464.194
16.7002	3-Trichloromethylheptafluorotoluene	57.0004	C8Cl3F7	136264-69-2	449.432	333.895
24.2787	3-Trifluoromethylbenzylamine, N-heptyl-N-octyl-	52.8919	C23H38F3N	1000310-29-5	104477	385.296
6.09367	4-(3-Fluorophenyl)pyrimidine	58.6764	C10H7FN2	68049-18-3	250790	174.059
20.1803	4-(4-Chloro-alpha-phenylstyryl)-N,N-dimethylaniline	66.1595	C22H20ClN	1000241-84-3	79989.7	333.128
8.87091	4,2-Cresotic acid, 6-methoxy-, methyl ester, 3,5-dichloro-4,6-dimethoxy-o-toluate	51.4533	C20H20Cl2O7	5859-23-4	44342.7	442.059
9.16832	4,4'-Dimethoxystilbene	55.9049	C16H16O2	15638-14-9	20137.4	240.115
21.6101	4,4'-Sulfonyldiphthalic dianhydride	67.1938	C16H6O8S	2540-99-0	81731	357.978
16.0129	4-Amidino-2-phenylquinazoline	57.558	C15H12N4	1000252-25-4	82118.8	248.106
19.2125	4-Aminomethylcyclohexane carboxylic acid, N,N-bis(trimethylsilyl)-, trimethylsilyl ester	50.2778	C17H39NO2Si3	1000386-64-2	240989	373.229
20.1896	4-Azaphenanthrene, 1,2-dimethyl-4-phenylethynyl-	54.7447	C23H17N	1000298-83-7	63613.4	307.136
11.0884	4-Chloro-6-fluoro-pyrimidine	50.4137	C4H2ClFN2	51422-01-6	1667.66	131.989
15.1193	4-Fluorobenzylamine, N,N-diundecyl-	63.7061	C29H52FN	1000310-48-8	66350.6	433.408
14.3463	4H-1,2,4-Triazol-4-amine	72.5582	C2H4N4	584-13-4	224471	84.044
23.8522	4H-1-Benzopyran-4-one, 3-(3,4-dimethoxyphenyl)-6,7-dimethoxy-	61.3936	C19H18O6	24126-93-0	75529.5	342.11
28.9679	4-Hydroxyanthraquinone-2-carboxylic acid, di-TMS	50.3643	C21H24O5Si2	1000103-01-3	53850.5	412.116
32.8759	4-Imidazolidinone, 1-methyl-2,3-diphenyl-	50.3002	C16H16N2O	14400-14-7	180284	252.126
24.8767	4-Methoxy-2-([5-(2-naphthyloxy)pentyl]sulfanyl)pyrimidine	50.81	C20H22N2O2S	959082-16-7	78333.9	354.14
10.6595	4-Phenylthiomethyl-6-piperidino-1,3,5-triazin-2-amine	55.4083	C15H19N5S	22362-20-5	37783.1	301.136
6.28156	4-Pyridinol, TMS derivative	68.7519	C8H13NOSi	1000352-50-3	260590	167.077
22.8571	5-(p-Nitrophenoxymethyl)-3-phenyl-2-oxazolidone	51.7127	C16H14N2O5	5255-92-5	21136.1	314.09
12.9789	5,5-Dibutylnonane	57.1575	C17H36	6008-17-9	188942	240.282
19.6876	5,6-Dimethyl-2-diethylaminopyridine-3,4-dicarboxyimide	51.3709	C13H17N3O2	313263-49-9	13116.8	247.132
31.9309	5.alpha.-Cholestan-19-oic acid, 2.beta.-methoxy-	53.2601	C28H48O3	24637-69-2	83935.2	432.36
10.1192	5-Butyl-5-ethylpentadecane	56.0584	C21H44	1000360-42-8	74597.5	296.344
7.07837	5-Dodecanol acetate	61.3441	C14H28O2	60826-24-6	40395	228.209
16.5634	5-Methyl-4-triphenylsilyl-2-(2-phenylethynyl)pyridine	52.8954	C32H27NSi	31101-64-1	18001.1	453.191
12.5395	5-Nitro-10,10-dimethyl-9,10-dihydro-10-sila-2-azaanthrone	52.0451	C14H12N2O3Si	99506-32-8	504.883	284.062
23.566	5-Pentafluorophenyloxy-anthra[1,9-cd]isoxazol-6-one	53.6122	C20H6F5NO3	153880-59-2	208156	403.027
33.7892	6-(4-Fluoro-phenyl)-benzo[4,5]imidazo[1,2-c]quinazoline	60.9605	C20H12FN3	70371-91-4	70999.5	313.102
35.2488	6-(4-Fluoro-phenyl)-benzo[4,5]imidazo[1,2-c]quinazoline	50.3395	C20H12FN3	70371-91-4	1310.82	313.102
21.8184	6-(4-Fluoro-phenyl)-benzo[4,5]imidazo[1,2-c]quinazoline	54.1846	C20H12FN3	70371-91-4	63373	313.102
14.5435	6-(6-Methyl-pyrimidin-4-ylsulfanyl)-5-nitro-pyrimidin-4-ylamine	57.6009	C9H8N6O2S	1000275-12-2	203631	264.043
29.122	6-Methoxy-2,2,4-trimethyl-1,2,3,4-tetrahydro-.gamma.-carboline	60.4351	C15H20N2O	34595-00-1	196178	244.158
23.0227	7,8-Epoxylanostan-11-ol, 3-acetoxy-	52.1733	C32H54O4	1000187-60-9	274588	502.402
35.6092	7H-Dibenzo[c,h]phenothiazine	52.2977	C20H13NS	224-72-6	84200.4	299.077
16.0465	8-(2H-1,3-Benzodioxol-5-yl)-1-methyl-2,6-diazabicyclo[2.2.2]octane-3,5-dione	53.4576	C14H14N2O4	1000388-42-8	2501.41	274.095
14.7326	8-[6-Ketoheptylamino]-6-methoxylepidine	53.4283	C18H24N2O2	74509-60-7	24269.3	300.184
19.7331	8-Iodino-1,3,9-trimethyl-3,9-dihydro-purine-2,6-dione	51.3238	C8H9IN4O2	1000312-02-9	103379	319.977
8.8141	9,10-Anthracenedione, 1,4-dihydroxy-	55.8527	C14H8O4	81-64-1	7897.49	240.042
23.5156	9,12-Octadecadienoic acid (Z,Z)-, TMS derivative	78.4172	C21H40O2Si	56259-07-5	408691	352.28
17.4757	Acetaldehyde, [(trimethylsilyl)oxy]-, O-[bis[(trimethylsilyl)oxy]phosphinyl]oxime	50.9168	C11H30NO5PSi3	55282-61-6	46324	371.117
6.00468	Acetamide, 2-chloro-	60.0195	C2H4ClNO	1979-07-02	90710.5	92.998
9.37325	Acetic acid, 4-chlorophenyl ester	53.7604	C8H7ClO2	876-27-7	98569.7	170.013
18.6406	Adenine, 2TMS derivative	53.9936	C11H21N5Si2	17995-04-9	41271.8	279.134
33.7532	Adipic acid, 2,4-dimethylpent-3-yl tridecyl ester	54.1554	C26H50O4	1000353-53-0	1.97601e+06	426.371
26.5075	Adipic acid, diamide, N,N'-dimethyl-N,N'-diphenyl	50.7235	C20H24N2O2	1000324-57-2	69930.2	324.184
23.5814	Adipic acid, pentadecyl phenyl ester	55.5799	C27H44O4	1000324-20-8	213791	432.324
17.4573	Adonitol, 5TMS derivative	83.0377	C20H52O5Si5	35-22-3	440038	512.266
13.74	Aminomalonic acid, tris(trimethylsilyl)-	81.7949	C12H29NO4Si3	1000079-52-5	1.79789e+06	335.14
33.49	Androst-2-en-17-amine, 4,4-dimethyl-N-propyl-, (5.alpha.)-	52.1164	C24H41N	53286-43-4	60473.7	343.324
26.7857	Androst-5-en-3-one, 19-acetoxy-4,4-dimethyl-, oxime	53.0313	C23H35NO3	1000195-79-6	201593	373.262
21.5594	Aniline, N-benzylidene-p-chloro-,	50.3947	C13H10ClN	780-21-2	566.65	215.05
27.4357	Anthracene, 1,8-bis[(trimethylsilyl)ethynyl]-	51.9838	C24H26Si2	119796-31-5	414630	370.157
10.4408	Anthralin	53.0608	C14H10O3	1143-38-0	90853.4	226.063
25.1774	Arachidonic acid, TMS derivative	79.8675	C23H40O2Si	113516-18-0	1.01043e+06	376.28
11.9052	Azelaic acid, 2TBDMS derivative	65.9863	C21H44O4Si2	104255-97-2	229965	416.278
24.84	Azulene, 1,2,3-triphenyl-	53.9489	C28H20	1055-26-1	101157	356.157
12.1733	Benzaldehyde, 2,4-dimetoxy-, 3-pyridylcarbonylhydrazone	51.0937	C15H15N3O3	200626-65-9	24106	285.111
35.1599	Benzamide, 2,3,4-trifluoro-N-(2,4-dimethoxyphenyl)-	50.5527	C15H12F3NO3	1000339-09-3	91920.5	311.077
8.78689	Benzamide, N-(3-fluoro-2-methylphenyl)-2-[[5-methyl-2-(1-methylethyl)phenoxy]methyl]-	64.7373	C25H26FNO2	1000327-47-8	102456	391.195
31.5718	Benzamide, N-(3-nitrophenyl)-4-ethyl-	51.2293	C15H14N2O3	1000307-01-9	31559.1	270.1
12.2884	Benzamide, N-(4-ethoxyphenyl)-3-methyl-4-nitro-	53.1083	C16H16N2O4	1000319-19-1	874.92	300.111
18.3156	Benzamide, p-nitro-N-3H-[1,2,4]thiadiazolo[4,3-a]pyridin-3-ylidene-	50.7335	C13H8N4O3S	28912-76-7	13584.3	300.032
23.4559	Benzenamine, 4-(4-fluorophenyliminomethyl)-N,N-diethyl-	50.6348	C17H19FN2	1000260-40-0	443239	270.153
16.1595	benzenamine, 4-methyl-N-(4-methylphenyl)-N-[4-[4-phenyl-1,3-butadien-1-yl]phenyl]-	56.9405	C30H27N	1000402-73-0	41846.6	401.214
26.4338	benzene, 1,1'-methylenebis[3-(1,1-dimethylethyl)-5-methyl-4-[(trimethylsilyl)oxy]-	71.343	C29H48O2Si2	1000399-56-2	1.67062e+06	484.319
7.45011	Benzene, 1-chloro-4-fluoro-	50.1924	C6H4ClF	352-33-0	41481.9	129.999
21.4027	Benzene-1,2-dicarbonitrile, 4-(1,2,3,4-tetrahydro-2,3-dioxo-1-quinoxalinyl)-5-nitro-	52.378	C16H7N5O4	1000266-73-2	329699	333.05
18.9361	Benzeneacetonitrile, .alpha.-(2-bromoethyl)-.alpha.-phenyl-	55.425	C16H14BrN	39186-58-8	33089.4	299.031
11.0015	Benzeneacetonitrile, .alpha.-(2-bromoethyl)-.alpha.-phenyl-	66.6299	C16H14BrN	39186-58-8	269393	299.031
25.5365	benzenepropanoic acid, 4-[(4-formylphenyl)phenylamino]-, ethyl ester	52.7859	C24H23NO3	1000398-64-6	59832.1	373.168
12.8274	benzenepropanoic acid, 4-[(4-formylphenyl)phenylamino]-, ethyl ester	57.4028	C24H23NO3	1000398-64-6	38357.9	373.168
21.7157	Benzenesulfonamide, 4-(4-methylphthalazin-1-ylamino)-	60.1151	C15H14N4O2S	1000305-78-5	133875	314.084
13.7421	Benzimidazo[2,1-a]isoquinoline	60.7892	C15H10N2	239-44-1	643219	218.084
7.93985	Benzimidazo[2,1-a]isoquinoline	52.8958	C15H10N2	239-44-1	48286.7	218.084
5.37401	Benzo(b)thiophene-3-acetamide	80.9747	C10H9NOS	1505-58-4	980297	191.04
6.97504	Benzo[b]thiophene, 2-propyl-	60.5187	C11H12S	16587-32-9	178684	176.066
28.5957	Benzo-12-crown-4, 4'-(1,4,6,7-tetrahydro-1-methyl-5,8-dioxoimidazo[4,5-e][1,4]diazepin-7-yl)-	51.9381	C19H22N4O6	220876-86-8	101762	402.154
8.80072	benzoic acid, 4-(bromomethyl)-, 2-bromoethyl ester	56.8664	C10H10Br2O2	1000397-87-7	1.29375e+06	319.905
13.0804	benzoic acid, 5-(chlorosulfonyl)-2-nitro-, methyl ester	53.5412	C8H6ClNO6S	1000397-15-4	90755.3	278.96
30.7565	Benzoimidazol-1-yl-acetic acid, methyl ester	51.7407	C10H10N2O2	1000317-77-6	476182	190.074
14.6863	Benzonitrile, 4-[[4-(hexahydro-1H-azepin-1-yl)phenyl]azo]-	53.7546	C19H20N4	1000319-35-6	71859.1	304.169
14.8233	benzoxazole, 6-nitro-2-[2-phenylethenyl]-	56.6139	C15H10N2O3	1000396-91-5	62730.4	266.069
28.6406	Bis(diethyldithiocarbamato)copper	52.1885	C10H20CuN2S4	13681-87-3	15320	358.981
8.12212	Bis(dimethylamino)trifluorophosphorane	64.6869	C4H12F3N2P	1000306-14-7	65956.4	176.069
20.3076	Bisphenol A monomethyl ether, TMS derivative	55.2277	C19H26O2Si	1000283-55-5	65137.4	314.17
14.5496	Bucindolol	51.4671	C22H25N3O2	71119-11-4	139934	363.195
11.231	Butanedioic acid, 2TMS derivative	66.4545	C10H22O4Si2	40309-57-7	422890	262.106
14.2331	Butanethioic acid, 3-methyl-, S-(1-methylpropyl) ester	53.8179	C9H18OS	2432-91-9	93511.1	174.108
19.9548	Butanoic acid, tributylsilyl ester	51.4177	C16H34O2Si	1000279-48-4	535677	286.233
7.458	carbamic acid, N-(trimethylsilyl)-, trimethylsilyl ester	53.5452	C7H19NO2Si2	1000400-49-7	873514	205.095
14.7724	Carbostyril, 3-ethyl-4-hydroxy-7-(isopentyloxy)-	51.6187	C16H21NO3	22048-17-5	4219.57	275.152
32.3928	Cholesterol, TMS derivative	81.4197	C30H54OSi	1856-05-9	1.28579e+06	458.394
28.6084	Clopamide tri-methyl derivative	61.7498	C17H26ClN3O3S	149180-61-0	75828.4	387.138
11.2988	Coronene	53.6828	C24H12	191-07-1	115542	300.094
27.4799	Cyclodecasiloxane, eicosamethyl-	72.2715	C20H60O10Si10	18772-36-6	636964	740.188
20.145	Cyclodecasiloxane, eicosamethyl-	77.9268	C20H60O10Si10	18772-36-6	129134	740.188
33.1834	Cyclodecasiloxane, eicosamethyl-	60.7266	C20H60O10Si10	18772-36-6	330592	740.188
29.7949	Cyclodecasiloxane, eicosamethyl-	73.0488	C20H60O10Si10	18772-36-6	390571	740.188
31.9154	Cyclodecasiloxane, eicosamethyl-	66.2576	C20H60O10Si10	18772-36-6	175216	740.188
24.8503	Cyclodecasiloxane, eicosamethyl-	78.3383	C20H60O10Si10	18772-36-6	319841	740.188
30.858	Cyclodecasiloxane, eicosamethyl-	68.216	C20H60O10Si10	18772-36-6	223813	740.188
21.8652	Cyclodecasiloxane, eicosamethyl-	72.4023	C20H60O10Si10	18772-36-6	457616	740.188
8.46981	Cycloheptyl 2,3,4,5,6-pentafluorobenzoate	55.3496	C14H13F5O2	1000372-87-2	897.27	308.084
29.8023	Cyclononasiloxane, octadecamethyl-	50.4037	C18H54O9Si9	556-71-8	191727	666.169
18.2668	Cyclononasiloxane, octadecamethyl-	72.4748	C18H54O9Si9	556-71-8	128926	666.169
16.1659	Cyclooctasiloxane, hexadecamethyl-	74.6321	C16H48O8Si8	556-68-3	157407	592.15
32.7161	Cyclopropa[3',4']benz[1',2':4,5]azuleno[1,8a-d]-1,3-dioxole-5b,7,7a-triol, 3a,5a,6,7,8,8a,8b,11-octahydro-10-(hydroxymethyl)-2,2,4,6,8,8-hexamethyl-, 7,7a-diacetate, [3aS-(3a.alpha.,5a.alpha.,5b.alpha.,6.alpha.,7.beta.,7a.alpha.,8a.alpha.,8b.beta.,11aS*)]-	50.3912	C27H38O8	77573-38-7	388480	490.257
6.66984	D-(-)-Lactic acid, 2TMS derivative	90.7155	C9H22O3Si2	1000333-99-1	3.17494e+07	234.111
19.4007	D-(-)-Tagatose, pentakis(trimethylsilyl) ether, methyloxime (syn)	59.0012	C22H55NO6Si5	1000380-17-9	41075.4	569.288
22.5923	D-(+)-Galactose, pentakis(trimethylsilyl) ether, ethyloxime (isomer 1)	61.043	C23H57NO6Si5	1000394-65-5	271027	583.303
19.9518	D-(+)-Talose, pentakis(trimethylsilyl) ether, methyloxime (anti)	86.4964	C22H55NO6Si5	1000380-18-8	988223	569.288
19.7126	D-(+)-Talose, pentakis(trimethylsilyl) ether, methyloxime (syn)	87.1648	C22H55NO6Si5	1000380-18-7	3.5574e+06	569.288
19.5719	D-Allose, pentakis(trimethylsilyl) ether, methyloxime (syn)	83.2132	C22H55NO6Si5	1000380-19-7	206939	569.288
16.8053	D-Arabinose, tetrakis(trimethylsilyl) ether, ethyloxime (isomer 2)	86.4253	C19H47NO5Si4	1000394-64-9	1.81928e+06	481.253
5.72509	Decane	72.5639	C10H22	124-18-5	415441	142.172
6.10434	Decane, 4-methyl-	64.6118	C11H24	2847-72-5	1.11867e+06	156.188
27.2275	Dibenzo[b,f][1,4]thiazepine-11(10H)-thione	51.647	C13H9NS2	30690-43-8	36596	243.018
27.7282	Dichotine, 19-hydroxy-11-methoxy-, triacetate (ester)	56.2962	C29H34N2O11	29484-57-9	67934.8	586.216
30.0143	Diethyl malonate	59.0252	C7H12O4	105-53-3	193170	160.074
10.7685	Diglycolic acid, di(pentafluorobenzyl) ester	78.2511	C18H8F10O5	1000382-08-6	950270	494.021
11.2092	Dimethyl 2,2'-diaminobiphenyl-4,4'-dicarboxylate	58.0978	C16H16N2O4	23933-57-5	133719	300.111
10.7904	Dimethyl 2,2'-diaminobiphenyl-4,4'-dicarboxylate	50.6972	C16H16N2O4	23933-57-5	334061	300.111
11.385	Dimethyl 2,2'-diaminobiphenyl-4,4'-dicarboxylate	50.2554	C16H16N2O4	23933-57-5	63232.3	300.111
11.0386	Dimethyl 2,2'-diaminobiphenyl-4,4'-dicarboxylate	50.0403	C16H16N2O4	23933-57-5	139850	300.111
32.4147	Dimethyl 2-methoxy-1,3-dithiole-4,5-dicarboxylate	52.1128	C8H10O5S2	26314-42-1	47892.3	249.997
16.2159	Disiloxane, 1,1,3,3-tetramethyl-1,3-bis(4-methylphenyl)-	57.3238	C18H26OSi2	18055-70-4	32864	314.152
8.14076	Disiloxane, ethylpentamethyl-	64.0992	C7H20OSi2	6231-60-3	4.97192e+06	176.105
15.1775	Disperse Blue 1	51.0592	C14H12N4O2	2475-45-8	435956	268.096
20.2008	D-Mannitol, 6TMS derivative	77.3499	C24H62O6Si6	14317-07-8	421768	614.316
25.5531	D-Myo-Inositol, 1,2,4,5,6-pentakis-O-(trimethylsilyl)-, bis(trimethylsilyl) phosphate	83.0268	C27H69O9PSi7	55568-91-7	2.46124e+06	764.306
5.75222	D-Norleucine, N-methoxycarbonyl-, propyl ester	56.1092	C11H21NO4	1000344-10-9	97416	231.147
27.0586	Doconexent, TMS derivative	74.7942	C25H40O2Si	1000333-23-8	747469	400.28
9.31149	Dodecane	87.9393	C12H26	112-40-3	851833	170.203
14.048	Dodecane, 2,6,10-trimethyl-	54.9614	C15H32	3891-98-3	143437	212.25
19.2892	D-Pinitol, pentakis(trimethylsilyl) ether	68.5981	C22H54O6Si5	1000380-13-4	158085	554.277
25.4332	D-Ribofuranose, 2,3,5-tris-O-(trimethylsilyl)-, bis(trimethylsilyl) phosphate	61.5838	C20H51O8PSi5	69688-46-6	177774	590.217
17.3886	D-Ribofuranose, 5-deoxy-5-(methylsulfinyl)-1,2,3-tris-O-(trimethylsilyl)-	50.8955	C15H36O5SSi3	56700-80-2	31454.7	412.159
28.0312	dylchicine, 3-demethyl-	56.4198	C21H23NO6	7336-34-7	99741.8	385.153
17.2353	Eicosane	79.793	C20H42	112-95-8	524033	282.329
20.0145	Eicosane	67.2179	C20H42	112-95-8	674833	282.329
22.2299	Ellagic acid	54.722	C14H6O8	476-66-4	159843	302.006
9.0528	Ethane, 1,1-dimethoxy-2-[(2,2-dimethoxyethyl)thio]-]	56.0142	C8H18O4S	78102-16-6	85711	210.093
10.724	ethanol, 2,2'-[(1-methylethylidene)bis(4,1-phenyleneoxy)]bis-	66.5139	C19H24O4	1000402-29-3	187287	316.167
23.5084	Ethanol, 2-bromo-	55.4102	C2H5BrO	540-51-2	1.18379e+06	123.952
10.3783	Ethanolamine, 3TMS derivative	90.3836	C11H31NOSi3	5630-81-9	2.95127e+06	277.171
5.15984	Ethyl iso-allocholate	53.9573	C26H44O5	1000043-05-3	383283	436.319
8.60827	Ethylphosphonic acid, bis(tert-butyldimethylsilyl) ester	73.2256	C14H35O3PSi2	1000273-30-1	105381	338.186
17.9831	Fluorenone, 2,3,4,7-tetramethoxy-	54.0235	C17H16O5	127825-92-7	285168	300.1
33.3315	formamide, N-(4-hydroxyphenyl)-N-(phenylmethyl)-	50.2201	C14H13NO2	1000396-34-1	107543	227.095
11.4489	Glyceric acid, 3TMS derivative	50.5745	C12H30O4Si3	38191-87-6	68343.7	322.145
29.1086	Glycerol monostearate, 2TMS derivative	88.0191	C27H58O4Si2	1188-75-6	3.55708e+06	502.387
10.5055	Glycerol, 3TMS derivative	88.4444	C12H32O3Si3	6787-10-06	7.17292e+06	308.166
7.81849	Glycine, 2TMS derivative	65.8695	C8H21NO2Si2	7364-42-3	151735	219.111
11.0562	Glycine, 3TMS derivative	92.3085	C11H29NO2Si3	5630-82-0	14609676	291.151
12.3438	Hasubanan-9-ol, 7,8-didehydro-4,5-epoxy-3-methoxy-17-methyl-, (5.alpha.,9.alpha.,13.beta.,14.beta.)-	50.4207	C18H21NO3	24695-69-0	75838.2	299.152
14.1211	Heneicosane	73.4696	C21H44	629-94-7	896906	296.344
11.4192	Heptadecane	72.4859	C17H36	629-78-7	312668	240.282
12.1318	Heptadecane, 2,3-dimethyl-	55.6857	C19H40	61868-03-9	18429.5	268.313
22.7801	Heptadecanoic acid, TMS derivative	78.6037	C20H42O2Si	55517-58-3	1.08968e+07	342.295
6.3815	Heptafluorobutyric acid, 3,5-dimethylphenyl ester	55.2268	C12H9F7O2	1000307-62-9	64028.5	318.049
9.52871	Heptane, 5-ethyl-2-methyl-	71.2767	C10H22	13475-78-0	321375	142.172
28.3077	Heptasiloxane, hexadecamethyl-	52.8873	C16H48O6Si7	541-01-5	215456	532.184
21.0002	Heptasiloxane, hexadecamethyl-	52.8878	C16H48O6Si7	541-01-5	92558.7	532.184
22.6762	Heptasiloxane, hexadecamethyl-	57.8543	C16H48O6Si7	541-01-5	454816	532.184
30.6166	Heptasiloxane, hexadecamethyl-	55.0819	C16H48O6Si7	541-01-5	1743.94	532.184
23.9311	Hexadecanoic acid, (2-pentadecyl-1,3-dioxolan-4-yl)methyl ester	53.9568	C35H68O4	41563-11-5	163124	552.512
11.7195	Hexadecanoic acid, 1a,2,5,5a,6,9,10,10a-octahydro-5a-hydroxy-4-(hydroxymethyl)-1,1,7,9-tetramethyl-6,11-dioxo-1H-2,8a-methanocyclopenta[a]cyclopropa[e]cyclodecen-5-yl ester, [1aR-(1a.alpha.,2.alpha.,5.beta.,5a.beta.,8a.alpha.,9.alpha.,10a.alpha.)]-	50.8904	C36H56O6	77508-69-1	122556	584.408
8.84585	Hexane, 2,4,4-trimethyl-	63.559	C9H20	16747-30-1	92970.3	128.157
11.6192	Hexanedioic acid, 3,4-bis(ethoxycarbonyl)-2,5-dioxo-, diethyl ester	54.202	C16H22O10	101254-21-1	210518	374.121
20.1859	Indane-1,3-dione, 2-[5-(4-chlorophenyl)furfur-2-ylideno]-	61.3387	C20H11ClO3	1000294-04-8	29408.8	334.04
9.26565	Indeno[2',1':4,5]thieno[3,2-b]thiopyran	65.5023	C14H8S2	56830-85-4	12675.3	240.007
9.93214	Indeno[2',1':4,5]thieno[3,2-b]thiopyran	53.2123	C14H8S2	56830-85-4	55192.7	240.007
8.9838	Indol-3-one, 1-acetyl-2-furan-2-ylmethylene-1,2-dihydro-	53.3323	C15H11NO3	1000310-26-4	46051.6	253.074
27.1733	Inosine, 4TMS derivative	81.8299	C22H44N4O5Si4	1000332-74-7	837993	556.239
23.4523	Inositol, 1,2,4,5-tetrakis-O-(trimethylsilyl)-, bis[bis(trimethylsilyl) phosphate], myo-	56.1418	C30H78O12P2Si8	33981-93-0	304967	916.312
9.2323	Isobutylheptyloctylamine	66.139	C19H41N	1000310-32-1	26294.8	283.324
32.8661	Isophthalic acid, 2,5-dimethylphenyl ethyl ester	51.232	C18H18O4	1000344-53-9	46291.4	298.121
21.7111	Kaur-16-en-18-oic acid, 6,7,19-trihydroxy-, .gamma.-lactone, (4.alpha.,6.alpha.,7.beta.)-	60.3182	C20H28O4	7758-47-6	50065.2	332.199
21.6754	Kaur-16-en-18-oic acid, 6,7,19-trihydroxy-, .gamma.-lactone, (4.alpha.,6.alpha.,7.beta.)-	56.0343	C20H28O4	7758-47-6	26543.6	332.199
14.5565	L-5-Oxoproline, , 2TMS derivative	82.8603	C11H23NO3Si2	30274-77-2	3.96307e+06	273.122
29.5754	Lactulose, octakis(trimethylsilyl) ether, methyloxime (isomer 1)	51.6019	C37H89NO11Si8	1000380-09-7	22662.7	947.459
7.45569	L-Alanine, 2TMS derivative	86.5842	C9H23NO2Si2	27844-07-1	4.44362e+06	233.127
14.5326	L-Aspartic acid, 3TMS derivative	69.7483	C13H31NO4Si3	55268-53-6	1.4475e+06	349.156
10.949	Levobunolol methylboronate	66.1724	C18H26BNO3	127202-08-8	186159	315.201
16.0263	L-Glutamic acid, 3TMS derivative	88.662	C14H33NO4Si3	15985-07-6	2.83337e+06	363.172
14.6097	L-Hydroxyproline, (E)-, 3TMS derivative	65.4969	C14H33NO3Si3	55429-66-8	81692	347.177
10.8402	L-Isoleucine, 2TMS derivative	78.849	C12H29NO2Si2	7483-92-3	974723	275.174
10.4739	l-Norleucine, N-ethoxycarbonyl-, decyl ester	76.0206	C19H37NO4	1000329-58-5	1.77262e+06	343.272
5.7469	l-Norleucine, N-methoxycarbonyl-, isohexyl ester	52.0001	C14H27NO4	1000329-50-4	275473	273.194
8.38637	l-Norvaline, N-(2-methoxyethoxycarbonyl)-, undecyl ester	70.1963	C20H39NO5	1000328-64-3	72891.3	373.283
16.1122	L-Phenylalanine, 2TMS derivative	65.4562	C15H27NO2Si2	7364-51-4	167710	309.158
7.46186	l-Phenylalanine, N-ethoxycarbonyl-, pentyl ester	54.0731	C17H25NO4	1000313-72-8	131236	307.178
10.9153	L-Proline, 2TMS derivative	73.4861	C11H25NO2Si2	7364-47-8	1.35805e+06	259.142
17.9633	l-Proline, n-heptafluorobutyryl-, butyl ester	57.8772	C13H16F7NO3	1000321-09-9	142616	367.102
15.1106	L-Threonic acid, tris(trimethylsilyl) ether, trimethylsilyl ester	73.0584	C16H40O5Si4	1000352-53-3	116705	424.195
12.3842	L-Threonine, 3TMS derivative	83.1001	C13H33NO3Si3	7537-02-02	583731	335.177
9.48291	L-Valine, 2TMS derivative	82.6499	C11H27NO2Si2	7364-44-5	1.23755e+06	261.158
14.0427	Malic acid, 3TMS derivative	72.463	C13H30O5Si3	38166-11-9	659668	350.14
6.36156	Malonic acid, 2-(2,3-dihydrobenzo[b]furan-5-yl)-2-hydroxy-, dimethyl ester	57.7103	C13H14O6	1000158-50-7	21416.4	266.079
5.16809	Malononitrile, 2-phenylazo-	59.1458	C9H6N4	1000316-88-1	28145.1	170.059
9.86907	Methanone, (2,3-dihydro-5-benzofuryl)(4-morpholyl)-	60.6418	C13H15NO3	1000268-71-6	73671.2	233.105
7.93312	Methanone, (2,3-dihydro-5-benzofuryl)(4-morpholyl)-	66.0739	C13H15NO3	1000268-71-6	186159	233.105
29.119	methanone, bis(phenylsulfonyl)-, 2-phenylhydrazone	64.9087	C28H20N2O	1000398-95-0	319988	400.158
9.14807	Methyl 2,4,6-trinitrobenzoate	63.982	C8H5N3O8	15012-38-1	23527.9	271.008
9.97221	Methyl 2,4,6-trinitrobenzoate	57.4632	C8H5N3O8	15012-38-1	59735.9	271.008
6.24277	Methyltris(trimethylsiloxy)silane	85.8055	C10H30O3Si4	17928-28-8	570637	310.127
26.0573	Myo-Inositol, 1,3,4,5,6-pentakis-O-(trimethylsilyl)-, bis(trimethylsilyl) phosphate	54.7991	C27H69O9PSi7	33910-06-4	125827	764.306
22.061	Myo-Inositol, 6TMS derivative	85.8415	C24H60O6Si6	2582-79-8	1.6201e+07	612.301
20.4365	Myo-Inositol, 6TMS derivative	70.9187	C24H60O6Si6	2582-79-8	227286	612.301
19.1967	Myristic acid, TMS derivative	52.4671	C17H36O2Si	18603-17-3	437277	300.248
24.022	Naltrexone	50.8774	C20H23NO4	16590-41-3	127722	341.163
24.0693	Naltrexone	54.9452	C20H23NO4	16590-41-3	622.856	341.163
14.1306	Niacinamide, TMS derivative	65.1562	C9H14N2OSi	1000374-74-5	621673	194.088
10.3926	Nonane, 3-methyl-5-propyl-	67.7326	C13H28	31081-18-2	562217	184.219
7.49701	Nonane, 4,5-dimethyl-	82.922	C11H24	17302-23-7	985041	156.188
6.68429	Nonane, 4,5-dimethyl-	83.6559	C11H24	17302-23-7	2.12413e+06	156.188
8.66328	Nonane, 5-butyl-	71.1991	C13H28	17312-63-9	144573	184.219
5.94205	Octane, 4-ethyl-	73.0165	C10H22	15869-86-0	244356	142.172
15.9164	Octane, 5-ethyl-2-methyl-	50.1474	C11H24	62016-18-6	128079	156.188
23.5814	Oleic Acid, (Z)-, TMS derivative	69.7257	C21H42O2Si	21556-26-3	438375	354.295
34.4242	Oxalic acid, monoamide, N-(2-octyl)-, propyl ester	50.2343	C13H25NO3	1000309-47-2	2947.81	243.183
21.6356	Palmitic Acid, TMS derivative	86.2793	C19H40O2Si	55520-89-3	2.79975e+07	328.28
20.9223	Pantothenic acid tritms	59.5222	C18H41NO5Si3	1000331-78-2	30938.6	435.229
14.5121	Pentanamide, N-(2-iodo-4-methylphenyl)-	53.0651	C12H16INO	1000306-89-7	13938.8	317.028
8.60843	Pentasiloxane, dodecamethyl-	65.6446	C12H36O4Si5	141-63-9	215099	384.146
23.6578	Petroselinic acid, TMS derivative	59.4093	C21H42O2Si	96851-53-5	45999.2	354.295
8.18998	Phenol, 2,6-bis(1,1-dimethylethyl)-4-isocyano-	63.3487	C15H21NO	20600-84-4	92423.8	231.162
10.737	Phenol, 2-methoxy-4-(1,2,3,4-tetrahydro-6,7-dimethoxy-1-isoquinolinyl)-	57.7442	C18H21NO4	1000277-25-4	43036.4	315.147
14.5199	Phenol, 4-[(5,6,7,8-tetrahydro-1,3-dioxolo[4,5-g]isoquinolin-5-yl)methyl]-, (R)-	57.0248	C17H17NO3	34168-00-8	151316	283.121
18.7016	Phenol, 4-methoxy-2-[5-(4-methylphenyl)-3-pyrazolyl)-	55.9157	C17H16N2O2	296243-80-6	15828.4	280.121
10.6368	Phosphonic acid, (phenylmethyl)-, bis(trimethylsilyl) ester	58.7122	C13H25O3PSi2	18406-56-9	91747.3	316.108
17.4705	Phosphoric acid, 2-(trimethylsiloxy)-1-[(trimethylsiloxy)methyl]ethyl bis(trimethylsilyl) ester	56.8214	C15H41O6PSi4	31038-12-7	99669.4	460.172
17.977	Phosphoric acid, bis(trimethylsilyl) 2,3-bis[(trimethylsilyl)oxy]propyl ester	86.7034	C15H41O6PSi4	31038-11-6	160953	460.172
8.79728	Phosphoric acid, bis(trimethylsilyl)monomethyl ester	81.5225	C7H21O4PSi2	18291-81-1	1.28865e+06	256.072
5.62298	Phosphorochloridic acid, dipentyl ester	56.6449	C10H22ClO3P	1000309-08-8	19077.4	256.1
18.2554	Phosphorylethanolamine, 4TMS derivative	71.1352	C14H40NO4PSi4	55334-92-4	845788	429.177
14.7469	Phthalimide, N-isopropyl-	57.4948	C11H11NO2	1000314-85-9	1.29773e+06	189.079
10.1769	Propanal, (1-methylethyl)hydrazone	53.3911	C6H14N2	16713-38-5	29386.1	114.116
10.4971	Propanamide, N,2-dimethyl-N-(2'-t-butylcarbonylphenyl)-	52.1236	C16H23NO2	163064-64-0	171792	261.173
33.9272	propanedinitrile, 2-(1-methyl-2,6-diphenyl-4(1H)-pyridinylidene)-	57.2241	C21H15N3	1000402-23-7	235156	309.127
33.1694	propanedinitrile, 2-[2-methyl-6-[2-(2,3,6,7-tetrahydro-1H,5H-benzo[ij]quinolizin-9-yl)ethenyl]-4H-pyran-4-ylidene]-	50.2534	C23H21N3O	1000402-55-1	191144	355.168
7.77324	Propanedinitrile, propylidene-	58.3474	C6H6N2	52833-34-8	11899.2	106.053
15.7144	Propanoic acid, 3-(1,2,3,5,6,11b-hexahydro-11H-pyrrolo[2,1-a]-.beta.-carbolin-11b-yl)-, methyl ester	60.8939	C18H22N2O2	96737-38-1	405376	298.168
5.5038	Propylene ozonide	58.0082	C3H6O3	38787-96-1	9962.76	90.032
17.2573	Pyrazine, 2,6-diethyl-	51.1197	C8H12N2	13067-27-1	400.371	136.1
16.0352	Pyridine, 3-((o-chlorophenyl)azo)-2,6-diamino-	53.3334	C11H10ClN5	74037-43-7	251605	247.062
27.1744	Pyrido[2,3-b]isoquinolino[3,4-d]furan-5(6H)-one, 7,9-dimethyl-	57.2993	C16H12N2OS	1000267-18-3	434469	280.067
14.3709	Pyrido[2,3-b]quinolin-5-one, 7-chloro-5,10-dihydro-2-phenyl-	57.6344	C18H11ClN2O	69750-07-8	169507	306.056
32.1994	Pyrrolo[1,2-a]-1,3,5-triazine-8-carbonitrile, 3-ethyl-1,2,3,4-tetrahydro-2,4-dioxo-7-phenyl-	52.9093	C15H12N4O2	54450-43-0	66666.9	280.096
21.3132	Scyllo-Inositol, 6TMS derivative	76.1561	C24H60O6Si6	14251-18-4	385880	612.301
22.5255	Sedoheptulose, o-methyloxime, hexakis-O-(trimethylsilyl)-	64.0614	C26H65NO7Si6	1000298-66-2	53269.2	671.338
11.9738	Serine, 3TMS derivative	88.7155	C12H31NO3Si3	64625-17-8	1.71364e+06	321.161
8.53732	Silane, cyclohexyldimethoxymethyl-	89.5625	C9H20O2Si	17865-32-6	1.26496e+06	188.123
27.73	Silane, diethyldecyloxyoctadecyloxy-	57.5193	C32H68O2Si	1000363-33-3	219053	512.499
13.9267	Silane, diethylheptadecyloxy(2-phenylethoxy)-	66.2985	C29H54O2Si	1000363-17-2	94039	462.389
25.5852	Silane, diethylpentadecyloxypropoxy-	65.042	C22H48O2Si	1000363-96-2	49564.8	372.342
20.2387	Silane, dimethyl(1-phenylpropoxy)tridecyloxy-	62.1767	C24H44O2Si	1000347-28-2	106101	392.311
20.1728	Silane, dimethyl(1-phenylpropoxy)tridecyloxy-	50.5759	C24H44O2Si	1000347-28-2	18547.7	392.311
20.8092	Silane, dimethyl(2-naphthoxy)tetradecyloxy-	67.58	C26H42O2Si	1000347-22-0	33455.1	414.295
22.8978	Silane, dimethyl(4-(2-phenylprop-2-yl)phenoxy)butoxy-	58.6211	C21H30O2Si	1000347-18-8	55283.3	342.202
21.7524	Silane, dimethyl(4-(2-phenylprop-2-yl)phenoxy)propoxy-	68.7464	C20H28O2Si	1000347-18-7	160184	328.186
22.471	silane, dimethyl(octadecyloxy)-	53.3448	C20H44OSi	1000402-38-9	50402.6	328.316
11.8323	Silane, dimethyldi(3-ethylphenoxy)-	54.7794	C18H24O2Si	1000347-47-4	923.564	300.155
10.4552	Silanol, trimethyl-, phosphate (3:1)	84.9884	C9H27O4PSi3	10497-05-9	2.22105e+07	314.095
13.4831	Silanol, trimethyl-, phosphate (3:1)	54.9914	C9H27O4PSi3	10497-05-9	69203.4	314.095
16.5634	Silanol, trimethyl-, pyrophosphate (4:1)	51.5718	C12H36O7P2Si4	18395-45-4	46319.6	466.101
21.7884	Spiro[furan-3(2H),7'(8'H)-[1H]naphtho[1,8a-c]furan]-2,3'(5'H)-dione, 5-(3-furanyl)-4,5,6',6'a,9',10'-hexahydro-8'-methyl-, [6'aS-[6'a.alpha.,7'.beta.(S*),8'.beta.,10'aR*]]-	50.8527	C20H22O5	65596-26-1	24376.1	342.147
23.9618	Stearic acid, TBDMS derivative	60.3801	C24H50O2Si	87020-51-7	58490.3	398.358
23.8728	Stearic acid, TMS derivative	85.7572	C21H44O2Si	18748-91-9	1.64376e+07	356.311
34.5582	Stigmast-5-ene, 3.beta.-(trimethylsiloxy)-, (24S)-	60.1534	C32H58OSi	25873-56-7	299597	486.426
14.5293	Succinic acid, 2,2-dichloroethyl 2,2,3,3,3-pentafluoropropyl ester	51.9936	C9H9Cl2F5O4	1000390-86-4	6800.2	345.98
10.2392	Succinic acid, 2-methylpent-3-yl neopentyl ester	58.1521	C15H28O4	1000389-57-8	83966.9	272.199
8.49678	Succinic acid, 3-chlorophenyl 3-phenylprop-2-en-1-yl ester	52.522	C19H17ClO4	1000391-04-7	104877	344.082
14.8171	Succinic acid, 3-chlorophenyl tetrahydrofurfuryl ester	65.5615	C15H17ClO5	1000390-72-2	113653	312.076
20.5971	Succinic acid, hex-4-yn-3-yl 3-nitrophenyl ester	52.7681	C16H17NO6	1000390-13-6	414.006	319.106
11.0074	Succinic acid, hex-4-yn-3-yl pentafluorobenzyl ester	70.1618	C17H15F5O4	1000389-88-3	333534	378.089
28.6782	Tetracosamethyl-cyclododecasiloxane	74.4378	C24H72O12Si12	18919-94-3	640891	888.226
23.4122	Tetracosamethyl-cyclododecasiloxane	73.6002	C24H72O12Si12	18919-94-3	285548	888.226
26.2087	Tetracosamethyl-cyclododecasiloxane	69.7515	C24H72O12Si12	18919-94-3	449443	888.226
10.5376	Thiazole, 5-phenyl-	51.527	C9H7NS	1826-13-7	169582	161.03
12.7355	Tridecane, 4-methyl-	61.6697	C14H30	26730-12-1	5691.69	198.235
9.54592	Trihexyphenidyl	61.1802	C20H31NO	144-11-6	52693.4	301.241
11.3412	Trisiloxane, octamethyl-	74.4551	C8H24O2Si3	107-51-7	1.52112e+06	236.108
12.7742	Tromethamine, 3TMS derivative	61.8843	C13H35NO3Si3	1000366-66-0	326248	337.192
19.6494	Tyrosine, 2TMS derivative	67.2089	C15H27NO3Si2	7536-83-6	520753	325.153
9.67679	Undecane, 4,8-dimethyl-	65.6606	C13H28	17301-33-6	62691.2	184.219
10.0179	Undecane, 5,7-dimethyl-	68.7371	C13H28	17312-83-3	662.763	184.219
11.6032	Uracil, 2TMS derivative	87.9325	C10H20N2O2Si2	10457-14-4	870290	256.106
10.0729	Urea, 2TMS derivative	89.2489	C7H20N2OSi2	18297-63-7	1.65961e+07	204.111
25.958	Uridine, 3TMS derivative	71.4592	C18H36N2O6Si3	10457-16-6	677870	460.188
17.1872	Xylitol, 5TMS derivative	72.1123	C20H52O5Si5	14199-72-5	157375	512.266
19.5019	Xylitol, 5TMS derivative	58.6958	C20H52O5Si5	14199-72-5	106253	512.266

## Sheet: Supplementary table 6
Retention Time (RT)	Metabolites	% similarity	Molecular Formula	CAS Number	Peak Area	Molecular Weight (MW)
8.49826	(.+/-.)-3-Hydroxybutyric acid, 2TMS derivative	74.1759	C10H24O3Si2	1000333-75-4	324503	248.126
33.7485	(+)-.alpha.-Tocopherol, O-pentafluoropropionyl-	57.3349	C32H49F5O3	1000374-71-7	1.25715e+06	576.36
7.72429	(2S,3R)-3-[(4E,7E)-Nona-4,7-dienoyl]-N,N-bis(trimethylsilyl)oxirane-2-carboxamide	58.7846	C18H33NO3Si2	1000395-61-1	7.99946e+06	367.2
10.5585	(3S,5R,8aR)-3-Butyl-5-(pent-4-en-1-yl)octahydroindolizine	50.5624	C17H31N	1000367-21-1	24299	249.246
9.51217	(Z)-2-Methoxymethoxy-stilbene	51.084	C16H16O2	115032-31-0	409.847	240.115
10.3486	.alpha.-Hydroxystearic acid	53.1547	C18H36O3	1330-70-7	48072.8	300.266
21.8533	.alpha.-Lumicolchicine	54.6593	C44H50N2O12	7183-82-6	88321.9	798.336
32.4462	1-(3-Methylbutyl)-2,3,5-trimethylbenzene	52.0527	C14H22	107997-60-4	2.81334e+07	190.172
24.0639	1-(3-Spiro-cyclopentane-3,4-dihydro-isoquinolin-1-ylmethyl)-3,3-dimethyl-3,4-dihydro-isoquinoline	53.6222	C25H28N2	1000301-10-2	149616	356.225
33.263	1-(5'-methylfurfuryl)pyrrolidine	53.0346	C10H15NO	1000366-03-9	42828.7	165.115
9.47918	1-(Isopropylamino)-3-(1-naphthyloxy)-1,2-propanediol	75.9789	C16H21NO3	1000122-64-2	301652	275.152
19.6426	1-(tert-Butyl)-2-cyano-3,3-dimethylpiperidine	56.7027	C12H22N2	125943-31-9	79957.3	194.178
8.09234	1,2,3,6,7,8-Hexahydro-10H-cyclopenta[4,5]thieno[2,3-d]pyrrolo[1,2-a]pyrimidine-10-thione	50.2119	C12H12N2S2	102254-60-4	33011.4	248.044
35.3747	1,2,4-benzenetricarboxylic acid, 3,5-dinitro-, trimethyl ester	51.5986	C12H10N2O10	1000398-22-5	171778	342.034
23.5564	1,2,4-Triazolo[2,3-a]pyrimidine, 1,8a-dihydro-5-difluoromethyl-2-trifluoromethyl-7-phenyl-	55.6975	C13H9F5N4	1000265-51-7	5.77257e+06	316.075
10.4326	1,2:4,5-Dibenzopyrene	64.4035	C24H14	192-65-4	15699.5	302.11
10.5387	1,2-Benzenediol, O-acetoxyacetyl-O'-(4-butylbenzoyl)-	55.5281	C21H22O6	1000330-49-5	135891	370.142
6.38974	1,2-Cyclohexanedicarboxylic acid, butyl 3,5-dimethylcyclohexyl ester	50.4623	C20H34O4	1000339-84-7	15888.5	338.246
33.7644	1,2-Diiodoethylene	54.1944	C2H2I2	1000222-24-1	98954.5	279.825
6.0312	1,2-Ethanediamine, N,N'-dimethyl-N,N'-bis(1-methylethyl)-	68.8318	C10H24N2	54966-00-6	275923	172.194
33.793	1,3,4-Oxadiazole, 2-(chloromethyl)-5-methyl-	59.317	C4H5ClN2O	1000338-17-2	136947	132.009
15.7677	1,3,5,7-Tetraethyl-1-hydroxycyclotetrasiloxane	54.9572	C8H24O5Si4	75221-54-4	136872	312.07
9.06327	1,3-Propanediol, 2TMS derivative	61.2632	C9H24O2Si2	17887-80-8	134457	220.131
20.1059	1,4-Benzenediol, 2-octadecyl-	61.29	C24H42O2	1706-70-3	54239.1	362.318
9.20495	1,4-Dimethyl-2,5-di(cyclopentyl)benzene	54.615	C18H26	100325-72-2	866.059	242.203
33.5979	1,4-pentadien-3-one, 1,5-bis[4-[bis(4-methylphenyl)amino]phenyl]-	55.5482	C45H40N2O	1000399-91-3	48252.6	624.314
19.1041	1,5-Dihydroxy-6-methoxyxanthone	55.7488	C14H10O5	181307-35-7	578517	258.053
16.4321	10,11-Dihydro-2,3,6-trimethoxydibenz(b,f)oxepin-10-one	59.6731	C17H16O5	19172-30-6	127016	300.1
18.5818	10,11-Dihydro-2,3,6-trimethoxydibenz(b,f)oxepin-10-one	55.4357	C17H16O5	19172-30-6	632.839	300.1
28.7906	10-Methylanthracene-9-carboxaldehyde	51.3781	C16H12O	7072-00-6	189699	220.089
20.5659	13.beta.-Ethyl-3-oximinogon-4-en-17-one 3-TMS	51.5885	C22H35NO2Si	1000090-32-3	66682.3	373.244
18.2117	17a-Aza-D-homoandrostan-17-one, (5.alpha.)-	62.2772	C19H31NO	17556-10-4	76395.7	289.241
16.8996	17-Methoxy-d-homo-18-norandrosta-4,8,13,15,17-pentaen-3-one	71.0233	C20H22O2	102323-79-5	297612	294.162
18.8092	1-Azaspiro[4.4]non-7-en-2-one, 1-[2-(1,3-benzodioxol-5-yl)ethyl]-6-hydroxy-, (1.beta.,6.alpha.)-, .+/-.-	54.5291	C17H19NO4	114942-77-7	1581.75	301.131
12.5317	1-Cyano-4-diphenyl(tert-butyl)silyloxybenzene	52.2898	C23H23NOSi	1000307-86-7	1253.1	357.155
11.2588	1-Cyano-4-diphenyl(tert-butyl)silyloxybenzene	60.3885	C23H23NOSi	1000307-86-7	36271.1	357.155
20.6151	1-Cyclohexyldimethylsilyloxyhexadecane	60.9319	C24H50OSi	1000281-96-7	372705	382.363
32.7786	1-Ethyl-1-(3-pentadecyloxy)-1-silacyclopentane	50.3387	C21H44OSi	1000282-47-7	205363	340.316
17.8052	1H-1-Pyrindine-2,7-dione, 1-[2-(1,3-benzodioxol-5-yl)ethyl]-3,4,5,6-tetrahydro-	54.5448	C17H17NO4	114942-65-3	22637.2	299.116
11.8854	1-Hexadecanol, TBDMS derivative	71.9833	C22H48OSi	76358-80-0	20255.7	356.347
12.6668	1-Hexadecanol, TBDMS derivative	61.8038	C22H48OSi	76358-80-0	14593.4	356.347
19.2251	1-Hexadecanol, TBDMS derivative	63.599	C22H48OSi	76358-80-0	26472.3	356.347
11.5482	1-Hexadecanol, TBDMS derivative	64.8141	C22H48OSi	76358-80-0	161342	356.347
22.6876	1H-Indole-2-carboxylic acid, 6-(4-ethoxyphenyl)-3-methyl-4-oxo-4,5,6,7-tetrahydro-, isobutyl ester	54.0083	C22H27NO4	1000316-17-3	122344	369.194
33.0399	1H-Isoindole-1,3(2H)-dione, 2,2'-(1,4-phenylene)bis-	51.9109	C22H12N2O4	5862-79-3	22928.5	368.08
29.7367	1H-Phenanthro[9,10-d]imidazole, 1,2-diphenyl-	55.6931	C27H18N2	16408-28-9	66745.8	370.147
14.5277	1H-Quinolin-2-one, 5,8-dimethoxy-1,4-dimethyl-	60.7769	C13H15NO3	1000311-04-0	150647	233.105
31.7144	1-Hydroxy-2-methylanthraquinone, TMS derivative	56.0256	C18H18O3Si	1000103-73-5	216617	310.103
19.2025	1-Isobutylsulfanylmethyl-2,8,9-trioxa-5-aza-1-sila-bicyclo[3.3.3]undecane	67.519	C11H23NO3SSi	69821-15-4	393667	277.117
15.024	1-Methyl-N,N-bis(trimethylsilyl)-4-[(trimethylsilyl)oxy]-1H-imidazol-2-amine	85.0141	C13H31N3OSi3	1000333-94-6	1.41332e+06	329.177
27.3376	1-Monopalmitin, 2TMS derivative	80.8381	C25H54O4Si2	1188-74-5	1.10524e+07	474.356
6.74294	1-Phenyl-2,4,5-trioxoimidazolidine	50.502	C9H6N2O3	2211-33-8	25409.9	190.038
16.795	1-Propanol, 2-methyl-3-(tributylstannyl)-	52.4313	C16H36OSn	31123-79-2	131926	364.179
8.3837	2-((2-Chloroethyl)ethylamino)ethanol, TMS derivative	63.8497	C9H22ClNOSi	1000226-84-1	189612	223.116
14.7541	2-(1,4,7,10,13-Pentaoxa-16-aza-cyclooctadec-16-yl)-acetamide	63.0541	C14H28N2O6	307331-35-7	34384.8	320.195
10.906	2(1H)-Pyrimidinone, 3,4-dihydro-1-methyl-4-thioxo-	55.7616	C5H6N2OS	35455-86-8	92306.2	142.02
14.2446	2,2,7,7-Tetramethyloctane	53.8584	C12H26	1071-31-4	79846	170.203
35.3837	2,3,4-Trifluorobenzoic acid, 3,5-dimethylphenyl ester	58.6575	C15H11F3O2	1000308-03-2	77168.7	280.071
15.1099	2,3,4-Trihydroxybutyric acid tetrakis(trimethylsilyl) deriv., (, (R*,R*)-)	56.5926	C16H40O5Si4	38191-88-7	83577.6	424.195
6.5791	2,3-Dihydro-1H-cyclopenta[b]quinoxaline	51.2409	C11H10N2	7193-24-0	12925.1	170.084
26.6579	2,4,6,8,10-Tetradecapentaenoic acid, 9a-(acetyloxy)-1a,1b,4,4a,5,7a,7b,8,9,9a-decahydro-4a,7b-dihydroxy-3-(hydroxymethyl)-1,1,6,8-tetramethyl-5-oxo-1H-cyclopropa[3,4]benz[1,2-e]azulen-9-yl ester, [1aR-(1a.alpha.,1b.beta.,4a.beta.,7a.alpha.,7b.alpha.,8.alpha.,9.beta.,9a.alpha.)]-	53.4657	C36H46O8	77550-17-5	8822.52	606.319
21.6226	2,4',6-Trichloro-1,1'-biphenyl	50.2298	C12H7Cl3	38444-77-8	17684.9	255.961
10.3942	2,4-Dimethyldodecane	75.4448	C14H30	6117-99-3	584219	198.235
10.121	2,6-Dimethyldecane	63.0491	C12H26	13150-81-7	115597	170.203
15.2709	2-Amino-4-morpholino-6-phenylcarbamoyl-1,3,5-triazine	53.6727	C14H16N6O2	7537-63-5	809.59	300.133
14.1316	2-Amino-4-morpholino-6-phenylcarbamoyl-1,3,5-triazine	52.1979	C14H16N6O2	7537-63-5	82136.3	300.133
33.1872	2-Benzylidene-coumaran-3-one	61.7318	C15H10O2	1000403-52-7	368256	222.068
21.4044	2-Bromodecylphthalimide	50.2117	C18H24BrNO2	1000227-42-0	521003	365.099
11.8533	2-Butenedioic acid, (E)-, 2TMS derivative	75.0871	C10H20O4Si2	17962-03-7	462314	260.09
21.9899	2-Fluoro-6-trifluoromethylbenzamide, N-(4-fluorophenyl)-	50.3807	C14H8F5NO	1000358-11-3	1508.69	301.053
32.6977	2H,6H-Pyrano[3,2-b]xanthen-6-one, 5,9,10-trihydroxy-2,2-dimethyl-	51.8933	C18H14O6	3811-29-8	323547	326.079
32.7594	2H,8H-Benzo[1,2-b:5,4-b']dipyran-2-one, 5-methoxy-8,8-dimethyl-10-(3-methyl-2-butenyl)-	51.3322	C20H22O4	55334-39-9	163129	326.152
8.15089	2H-1,4-Benzoxazine-2,3(4H)-dione	55.3957	C8H5NO3	3597-63-5	180519	163.027
9.81562	2H-1-Benzopyran-2-one, 3,7-dimethoxy-	50.1392	C11H10O4	29076-68-4	502.245	206.058
5.86653	2-Methyl-5-butyl-benzo(d)oxazole	50.2971	C12H15NO	131222-26-9	30010.9	189.115
28.7954	2-Monostearin, 2TMS derivative	69.3071	C27H58O4Si2	53336-13-3	950546	502.387
27.0181	2-Palmitoylglycerol, 2TMS derivative	75.6145	C25H54O4Si2	53212-97-8	963654	474.356
10.2009	2-Phenazinecarbonitrile, 7-amino-	53.2901	C13H8N4	18450-22-1	69982.8	220.075
6.3382	2-Phenyl-1,3-oxazol-2-ine	51.6305	C9H9NO	7127-19-7	70075.3	147.068
19.9577	2-Phenyl-1,3-oxazol-2-ine	50.7725	C9H9NO	7127-19-7	290562	147.068
5.11931	2-Piperidinone	51.1559	C5H9NO	675-20-7	281294	99.068
6.67088	2-Propanone, 1-fluoro-	51.0882	C3H5FO	430-51-3	274004	76.032
21.7951	2-p-Tolyl-6-(4-trifluoromethyl-phenyl)-pyridine	56.0788	C19H14F3N	1000193-41-2	638.717	313.108
11.0515	2-thiazolamine, 5-phenyl-	50.4826	C9H8N2S	1000404-73-4	159181	176.041
25.5405	3,4-Dichloro-1-diphenyl(tert-butyl)silyloxybenzene	52.0536	C22H22Cl2OSi	1000307-86-8	28032.7	400.082
10.975	3,5-Bis(trifluoromethyl)benzylamine, N-tert-butyldimethylsilyl-	64.2848	C15H21F6NSi	1000417-33-0	96157	357.135
14.8452	3,5-di-tert-Butyl-4-hydroxyphenylpropionic acid	78.4392	C17H26O3	20170-32-5	8.90915e+06	278.188
21.6598	3,6-Bis(2-methylphenyl)-2,5-dihydropyrrolo[3,4-c]pyrrole-1,4-dione	52.3794	C20H16N2O2	107680-83-1	56573.6	316.121
35.4649	3,6-Dicarboethoxy-carbazole	52.0584	C18H17NO4	3215-42-7	78201	311.116
6.80216	3,6-Dioxa-2,4,5,7-tetrasilaoctane, 2,2,4,4,5,5,7,7-octamethyl-	55.5457	C10H30O2Si4	4342-25-0	230859	294.132
14.263	3,7-dioxa-2,8-disilanonane, 2,2,8,8-tetramethyl-5,5-bis[[(trimethylsilyl)oxy]methyl]-	78.1207	C17H44O4Si4	1000402-79-1	377979	424.232
11.0092	3-Acetoxy-2-(3,4-diacetoxyphenyl)-7-methoxy-4H-chromen-4-one	53.3423	C22H18O9	95026-16-7	155598	426.095
9.43775	3-Amino-2-chloropyridine	50.3861	C5H5ClN2	6298-19-7	6721.01	128.014
7.93731	3-Aminopropanol, 2TBDMS derivative	60.9778	C15H37NOSi2	1000333-00-9	388652	303.241
15.9172	3-Ethyl-3-methylheptane	52.0784	C10H22	17302-01-1	144164	142.172
35.0353	3'-Hydroxy-4'-O-methylglabridin	51.4445	C21H22O5	175554-11-7	37441.1	354.147
17.2357	3-Methyl-3-pentyl methylphosphonofluoridate	62.6251	C7H16FO2P	1000216-68-4	170725	182.087
14.8152	3-Methylbutyl N,O-bis(heptafluorobutyryl)hydroxyprolinate	54.6404	C18H17F14NO5	1000105-07-9	44198.9	593.088
13.0083	3-Methyl-pyrrolo(2,3-b)pyrazine	55.632	C7H7N3	20321-99-7	508.15	133.064
19.7209	3-Methyl-pyrrolo(2,3-b)pyrazine	53.0065	C7H7N3	20321-99-7	272168	133.064
14.3049	3-Oxazolidinecarboxylic acid, 4-[(3-chlorobenzoyl)oxy]-2-(1,1-dimethylethyl)-5-hydroxy-, methyl ester, [2R-(2.alpha.,4.alpha.,5.beta.)]-	53.4868	C16H20ClNO6	122877-13-8	45416.5	357.098
7.94753	3-pyrazolidinone, 1-(2-ethylphenyl)-4,4-dimethyl-	55.163	C13H18N2O	1000396-22-5	91484.5	218.142
23.8784	3-Trifluoromethylbenzylamine, N,N-diundecyl	54.3248	C30H52F3N	1000310-29-9	369146	483.405
12.5514	3-Tripropylsilyloxytridecane	55.4439	C22H48OSi	1000280-54-7	370.314	356.347
8.92789	4-[(2-Hydroxy-benzylidene)-amino]-benzoic acid	72.2036	C14H11NO3	788-24-9	69066.2	241.074
9.85878	4-[(2-Hydroxy-benzylidene)-amino]-benzoic acid	51.8245	C14H11NO3	788-24-9	28242.4	241.074
13.7775	4-[3-Methoxyphenyl]-3-thiosemicarbazone 2-acetylpyridine	52.3065	C15H16N4OS	70618-30-3	396.34	300.104
28.6149	4-[N-(2-Chlorophenyl)-N-methylamino]-2-methoxy-2a-(4-chlorophenyl)-1,2,2a,3-tetrahydroazeto(1,2-a)(1,5)-benzodiazepin-1-one	56.4239	C25H21Cl2N3O2	122503-55-3	438319	465.101
16.3911	4-Chloro-5-methyl-thieno[2,3-d]pyrimidine-6-carboxylic acid octylamide	51.4898	C16H22ClN3OS	1000275-02-4	225153	339.117
35.1998	4'-Chloro-6,8-dimethylcinchophen	57.7561	C18H14ClNO2	351357-26-1	143283	311.071
33.6982	4'-Chloro-6,8-dimethylcinchophen	57.7498	C18H14ClNO2	351357-26-1	589537	311.071
29.7031	4-Dichloromethyldimethylsilyloxyhexadecane	54.3284	C19H40Cl2OSi	1000283-10-9	78596.4	382.223
16.5858	4-Dimethylisopropylsilyloxyhexadecane	52.7056	C21H46OSi	1000283-07-6	46139.5	342.332
32.8302	4-Ethylbenzoic acid, tridec-2-ynyl ester	50.2358	C22H32O2	1000292-54-9	85320.2	328.24
11.6351	4-Formyl-2-methoxyphenyl 5-formyl-2,3-methylenedioxyphenyl ether	55.042	C16H12O6	1000242-81-0	10134.9	300.063
18.0015	4H-1-Benzopyran-4-one, 5-(acetyloxy)-2-[3-(acetyloxy)-4-methoxyphenyl]-7-methoxy-	50.1815	C21H18O8	32174-63-3	59966.8	398.1
22.782	4H-1-Benzopyran-4-one, 5,6,7-trimethoxy-2-(4-methoxyphenyl)-	60.4918	C19H18O6	1168-42-9	4.3741e+06	342.11
30.7692	4H-1-Benzopyran-4-one, 5,6-bis(acetyloxy)-2-[3-(acetyloxy)-4-methoxyphenyl]-3,7-dimethoxy-	52.1056	C24H22O11	14397-72-9	84699.3	486.116
13.2525	4H-Naphtho[2,3-b]pyran-4-one, 5-methoxy-2-methyl-	50.0184	C15H12O3	55134-00-4	10227.4	240.079
27.035	4-Hydroxybenzyl alcohol, 2TBDMS derivative	51.0482	C19H36O2Si2	1000364-43-9	351974	352.225
35.7938	4-Methyl-2-(phenylacetyl)phenol	57.1072	C15H14O2	24258-63-7	167253	226.099
33.7408	4-Phenyl-3-butyn-2-one	59.6891	C10H8O	1817-57-8	853850	144.058
6.28424	4-Pyridinol, TMS derivative	71.9379	C8H13NOSi	1000352-50-3	382901	167.077
35.3443	5,7-Dihydroxy-3-[2,3-dihydro-4-hydroxy-2-(2-hydroxyisopropyl)benzofuran-7-yl]chromone	51.997	C20H18O7	99347-41-8	106272	370.105
22.0519	5-Iodo-2-trimethylsilyloxy-acetophenone	60.1674	C11H15IO2Si	97389-64-5	92485.1	333.989
32.4841	5-Methoxy-2-methyl-3-indoleacetic acid	50.5107	C12H13NO3	2882-15-7	41582.5	219.09
16.5714	5-Methyl-4-triphenylsilyl-2-(2-phenylethynyl)pyridine	56.302	C32H27NSi	31101-64-1	36729.9	453.191
32.0116	6-(4-Fluoro-phenyl)-benzo[4,5]imidazo[1,2-c]quinazoline	65.0904	C20H12FN3	70371-91-4	197172	313.102
23.8843	6,7,8-Trimethyl-7H-dibenzo[c,h]xanthene-5,9-diol	57.9684	C24H20O3	99893-92-2	3.6091e+06	356.141
5.70787	6-Amino-2-methyl-1H-pyrrolo[2,3-b]pyridine	56.4798	C8H9N3	55463-64-4	92418.8	147.08
11.3485	6-Chloro-3-trifluoromethyl-[1,2,4]triazolo[4,3-b]pyridazine	53.0806	C6H2ClF3N4	40971-95-7	95400.2	221.992
14.6276	6-Fluoro-N-(3-fluorophenyl)-4-hydroxyquinoline-3-carboxamide	50.1051	C16H10F2N2O2	1000409-44-1	1078.47	300.071
20.4793	6H-Dibenzo[b,d]pyran-9-methanol, 6a,7,8,10a-tetrahydro-1-hydroxy-6,6-dimethyl-3-pentyl-	56.5155	C21H30O3	26108-40-7	406909	330.219
16.7871	6-Methoxy-4-methylquinoline-2-thiol	55.6436	C11H11NOS	1000303-46-5	291962	205.056
28.0861	7aH-Cyclopenta[a]cyclopropa[f]cycloundecene-2,4,7,7a,10,11-hexol, 1,1a,2,3,4,4a,5,6,7,10,11,11a-dodecahydro-1,1,3,6,9-pentamethyl-, 2,4,7,10,11-pentaacetate	53.2496	C30H44O11	51906-08-2	266027	580.288
18.944	7H-Dibenzo[c,h]phenothiazine	62.1641	C20H13NS	224-72-6	16449.5	299.077
11.3396	8-Amino-6-quinolinol, 2TMS derivative	50.4339	C15H24N2OSi2	36972-87-9	97951.7	304.143
15.3746	9(10H)-Acridinone, 1-hydroxy-2,3,4-trimethoxy-10-methyl-	50.0804	C17H17NO5	7008-68-6	40025.7	315.111
10.0501	9,10-Anthracenedione, 1,5-dihydroxy-	54.7032	C14H8O4	117-12-4	534.503	240.042
18.2433	9,10-anthracenedione, 1-amino-4-[(4-methylphenyl)amino]-	54.1433	C21H16N2O2	1000402-38-7	19778.9	328.121
22.7924	9,10-anthracenedione, 1-amino-4-[(4-methylphenyl)amino]-	67.6949	C21H16N2O2	1000402-38-7	49383.2	328.121
23.5083	9,12-Octadecadienoic acid (Z,Z)-, TMS derivative	84.4003	C21H40O2Si	56259-07-5	1.6474e+06	352.28
21.6431	Acetamide, 2,2'-thiobis-	50.6935	C4H8N2O2S	14618-65-6	189073	148.031
15.4682	Acetamide, 2-[[4-methyl-5-(4-morpholinylmethyl)-4H-1,2,4-triazol-3-yl]thio]-	56.2574	C10H17N5O2S	1000316-38-6	129761	271.11
10.4646	Acetamide, N-cyclohexyl-2-(2-methyl-1H-indol-3-yl)-2-oxo-	59.5069	C17H20N2O2	1000310-65-0	524848	284.152
28.9645	Acridin-9-yl-(4-iodo-phenyl)-amine	52.7319	C19H13IN2	1000317-54-0	120888	396.012
27.751	Adenosine, 4TMS derivative	56.5375	C22H45N5O4Si4	53294-33-0	341239	555.255
32.7203	Adipic acid, 2,4-dimethylpent-3-yl tridecyl ester	58.9739	C26H50O4	1000353-53-0	256963	426.371
15.7299	Amphetamine, 2TMS derivative	58.0352	C15H29NSi2	57346-67-5	207638	279.184
10.6619	Anthraquinone, 1-(o-fluorophenyl)-	57.2649	C20H11FO2	20760-62-7	114346	302.074
26.5035	Arabinofuranose, 1,2,3,5-tetrakis-O-(trimethylsilyl)-	61.6257	C17H42O5Si4	55399-49-0	103059	438.211
25.9289	Arachidic acid, TMS derivative	51.3971	C23H48O2Si	55530-70-6	129022	384.342
25.1807	Arachidonic acid, TMS derivative	77.6755	C23H40O2Si	113516-18-0	390005	376.28
14.319	Benzaldehyde, 2,4-difluoro-3-hydroxy-	57.9589	C7H4F2O2	192927-69-8	196360	158.018
25.5324	Benzamide, 2-methoxy-N-(4-phenoxyphenyl)-	50.1651	C20H17NO3	1000339-11-3	187821	319.121
34.0548	Benzamide, N-(1H-1,3-benzimidazol-2-ylmethyl)-4-methoxy-	55.9078	C16H15N3O2	1000319-51-8	128819	281.116
33.2785	Benzamide, N,N-bis(2-ethylhexyl)-4-ethyl-	52.6963	C25H43NO	1000308-54-7	456161	373.334
30.4393	Benzenamine, N-(3-phenyl-2-propenylidene)-	59.7487	C15H13N	953-21-9	45747.1	207.105
5.5203	Benzenamine, N-3-butenyl-	56.2123	C10H13N	1000327-44-6	68350.9	147.105
7.27002	Benzene, [(3-methyl-2-butenyl)oxy]-	52.1221	C11H14O	14309-15-0	48008.5	162.104
12.0356	Benzene, 1-(1,1-dimethylethyl)-4-(methoxymethyl)-	50.5097	C12H18O	3395-87-7	100958	178.136
14.5533	Benzene, 1,1'-(1,1,10,10-tetramethyl-1,10-decanediyl)bis[3,4-dimethyl-	60.9374	C30H46	63934-83-8	2.04965e+06	406.36
9.21873	Benzene, 1,1'-(1-methylethylidene)bis[4-methoxy-	58.4029	C17H20O2	1568-83-8	41466.3	256.146
35.4608	benzene, 1,1',1'',1'''-(1,2-ethenediylidene)tetrakis[4-ethoxy-	57.5874	C34H36O4	1000399-65-7	126597	508.261
26.4366	benzene, 1,1'-methylenebis[3-(1,1-dimethylethyl)-5-methyl-4-[(trimethylsilyl)oxy]-	70.0613	C29H48O2Si2	1000399-56-2	878185	484.319
23.5698	Benzene-1,2-diol, 4-(4-iodophenyliminomethyl)-	61.5567	C13H10INO2	294195-24-7	273772	338.976
35.1425	Benzene-1,2-diol, 4-(4-iodophenyliminomethyl)-	60.5031	C13H10INO2	294195-24-7	60938.9	338.976
12.493	benzeneacetonitrile, 4-hydroxy-.alpha.-(4-hydroxyphenyl)-.alpha.-phenyl-	50.0476	C20H15NO2	1000402-15-4	17225.4	301.11
11.3022	Benzenepropanamide, .alpha.-amino-N-[3-[6-(dimethylamino)-9H-purin-9-yl]-2-hydroxycyclopentyl]-4-methoxy-, [1R-[1.alpha.(S*),2.alpha.,3.beta.]]-	52.0357	C22H29N7O3	34597-43-8	112407	439.233
20.2824	Benzenepropanoic acid, 3,5-bis(1,1-dimethylethyl)-4-hydroxy-, methyl ester	52.5004	C18H28O3	6386-38-5	32454.3	292.204
14.7316	Benzo[1,2-b:4,3-b']difuran	58.8426	C10H6O2	210-79-7	91089.2	158.037
10.5007	Benzo[1,2-c:3,4-c':5,6-c'']tris[1,2,5]oxadiazole	56.7708	C6N6O3	16279-15-5	226786	204.003
28.5889	Benzo-12-crown-4, 4'-(1,4,6,7-tetrahydro-1-methyl-5,8-dioxoimidazo[4,5-e][1,4]diazepin-7-yl)-	56.3074	C19H22N4O6	220876-86-8	154192	402.154
10.954	Benzoic acid, 2-propylamino-, propyl ester	54.9359	C13H19NO2	1000374-53-3	76041.1	221.142
20.138	Benzoic acid, 4-(dimethylamino)-, 2-oxo-2-phenylethyl ester	50.0629	C17H17NO3	55153-13-4	167364	283.121
14.6861	Benzonitrile, 4-[[4-(hexahydro-1H-azepin-1-yl)phenyl]azo]-	52.7654	C19H20N4	1000319-35-6	85287.1	304.169
35.5101	Bicyclo[2.2.1]hept-2-ene, 1,4,5,6-tetrachloro-7,7-dimethoxy-2-(1-methyl-1-propenyl)-	57.7137	C13H16Cl4O2	55493-64-6	53553.6	343.99
6.42667	Bis(dimethylamido)fluorothiophosphate	56.3255	C4H12FN2PS	1000305-97-4	10076.7	170.044
17.6325	Borinic acid, diethyl-, (2-ethyl-1,3,2-dioxaborolan-4-yl)methyl ester	50.1953	C9H20B2O3	58163-56-7	33551	198.16
12.2354	Butanenitrile, 3-(dibenzylamino)-4-phenyl-2-(p-toluenesulfonylamino)-	54.1723	C31H31N3O2S	1000161-98-9	876.003	509.214
7.98861	Butanenitrile, 3-chloro-3-methyl-	50.0608	C5H8ClN	53897-47-5	35843.2	117.035
7.30095	Butanoic acid, 3-(methylthio)-	52.0362	C5H10O2S	16630-65-2	38398.4	134.04
27.0522	Butyl 4,7,10,13,16,19-docosahexaenoate	72.3094	C26H40O2	1000336-80-3	151813	384.303
7.73295	Butylbis(isopentyl)amine	57.7773	C14H31N	97202-86-3	182835	213.246
11.9071	Butylphosphonic acid, 4-(2-phenylprop-2-yl)phenyl propyl ester	68.0863	C22H31O3P	1000323-09-1	52257.5	374.201
20.8151	Butylphosphonic acid, heptyl 4-(2-phenylprop-2-yl)phenyl ester	64.0785	C26H39O3P	1000323-09-7	43421.1	430.264
7.71367	Butyric acid, 2,2,3,3,4,4,4-heptafluorobutyl ester	56.7624	C8H9F7O2	1000376-65-4	219923	270.049
27.1309	Carbonic acid, monoamide, N-(4-phenoxyphenyl)-, neopentyl ester	52.916	C18H21NO3	1000340-00-1	11262.3	299.152
28.0264	Cephalotaxine, 11-(acetyloxy)-, acetate (ester), (11.alpha.)-	53.201	C22H25NO7	49686-56-8	124901	415.163
32.3756	Cholesterol, TMS derivative	74.7335	C30H54OSi	1856-05-9	628213	458.394
10.8781	Conanine, (5.alpha.)-	60.0515	C22H37N	468-33-7	4407.31	315.293
11.5706	Conanine, (5.alpha.)-	52.6155	C22H37N	468-33-7	142053	315.293
33.7353	Coronene, methyl-	50.9939	C25H14	13119-86-3	44911.3	314.11
12.848	Cyanic acid, ethyl ester	57.5932	C3H5NO	627-48-5	53182.1	71.037
34.7048	Cyclodecasiloxane, eicosamethyl-	50.0903	C20H60O10Si10	18772-36-6	626514	740.188
26.2056	Cyclodecasiloxane, eicosamethyl-	61.3169	C20H60O10Si10	18772-36-6	171204	740.188
24.8484	Cyclodecasiloxane, eicosamethyl-	75.3634	C20H60O10Si10	18772-36-6	133075	740.188
27.4725	Cyclodecasiloxane, eicosamethyl-	65.4191	C20H60O10Si10	18772-36-6	540240	740.188
21.8621	Cyclodecasiloxane, eicosamethyl-	70.9574	C20H60O10Si10	18772-36-6	535909	740.188
20.1584	Cyclodecasiloxane, eicosamethyl-	61.1029	C20H60O10Si10	18772-36-6	63402.4	740.188
15.1868	Cyclohexanone, 2-(3-trifluoromethylphenylaminomethyl)-	51.7375	C14H16F3NO	1000273-95-2	29911.2	271.118
26.2082	Cyclononasiloxane, octadecamethyl-	52.0695	C18H54O9Si9	556-71-8	687780	666.169
18.2688	Cyclononasiloxane, octadecamethyl-	71.1893	C18H54O9Si9	556-71-8	328512	666.169
16.175	Cyclooctasiloxane, hexadecamethyl-	63.8022	C16H48O8Si8	556-68-3	96033.3	592.15
6.67408	D-(-)-Lactic acid, 2TMS derivative	91.0232	C9H22O3Si2	1000333-99-1	5.35187e+07	234.111
19.5754	D-(+)-Talose, pentakis(trimethylsilyl) ether, methyloxime (syn)	54.7888	C22H55NO6Si5	1000380-18-7	55749.1	569.288
19.7114	D-(+)-Talose, pentakis(trimethylsilyl) ether, methyloxime (syn)	87.7718	C22H55NO6Si5	1000380-18-7	2.5361e+06	569.288
19.9443	D-Allose, pentakis(trimethylsilyl) ether, methyloxime (anti)	82.5725	C22H55NO6Si5	1000380-19-8	489779	569.288
16.8044	D-Arabinose, tetrakis(trimethylsilyl) ether, ethyloxime (isomer 2)	81.296	C19H47NO5Si4	1000394-64-9	673171	481.253
10.0297	Decane, 1-iodo-	63.3396	C10H21I	2050-77-3	449.484	268.069
10.0182	Decane, 2,3,6-trimethyl-	69.4989	C13H28	62238-12-4	122001	184.219
6.68525	Decane, 2,4,6-trimethyl-	80.8416	C13H28	62108-27-4	1.86178e+06	184.219
7.28446	Decane, 3,3,4,4,7,7,8,8-octafluoro-	51.6036	C10H14F8	40723-69-1	56879.3	286.097
20.5489	Decane, 5-ethyl-5-methyl-	63.7394	C13H28	17312-74-2	382562	184.219
5.94896	Decane, 5-methyl-	71.1739	C11H24	13151-35-4	218520	156.188
19.5141	D-Fructose, 1,3,4,5,6-pentakis-O-(trimethylsilyl)-, O-methyloxime	52.8602	C22H55NO6Si5	56196-14-6	169932	569.288
19.3921	D-Fructose, 1,3,4,5,6-pentakis-O-(trimethylsilyl)-, O-methyloxime	54.3244	C22H55NO6Si5	56196-14-6	27493.8	569.288
30.6075	Dibenz[c,h]acridin-7(14H)-one	62.0797	C21H13NO	50405-28-2	72829.1	295.1
10.4297	Dibenzo[fg,op]naphthacene	71.6175	C24H14	192-51-8	48914.9	302.11
17.3005	Dichloroacetic acid, 2-tetrahydrofurylmethyl ester	56.2568	C7H10Cl2O3	4697-00-1	45616.1	212.001
13.1792	Dimethylmalonic acid, di(4-acetylphenyl) ester	51.9408	C21H20O6	1000363-71-1	907.005	368.126
8.14329	Disiloxane, ethylpentamethyl-	63.3727	C7H20OSi2	6231-60-3	1.0324e+07	176.105
17.8791	Disiloxane, pentamethyl-2-propenyl-	52.9038	C8H20OSi2	7087-19-6	9618.47	188.105
7.79	Dixanthogen	52.0977	C6H10O2S4	502-55-6	10756.6	241.956
25.55	D-Myo-Inositol, 1,2,4,5,6-pentakis-O-(trimethylsilyl)-, bis(trimethylsilyl) phosphate	77.094	C27H69O9PSi7	55568-91-7	1.19015e+06	764.306
8.83413	Docosane, 11-butyl-	54.4942	C26H54	13475-76-8	94106.7	366.423
9.31198	Dodecane	85.8978	C12H26	112-40-3	846283	170.203
6.785	Dodecane, 2,6,10-trimethyl-	74.5601	C15H32	3891-98-3	903838	212.25
7.60005	Dodecane, 2,6,10-trimethyl-	69.0292	C15H32	3891-98-3	51816.9	212.25
10.2313	Dodecane, 4,6-dimethyl-	78.3784	C14H30	61141-72-8	304972	198.235
9.68568	Dodecane, 4-methyl-	68.9831	C13H28	6117-97-1	238388	184.219
19.2921	D-Pinitol, pentakis(trimethylsilyl) ether	63.5763	C22H54O6Si5	1000380-13-4	197612	554.277
21.1331	Eicosane	58.8927	C20H42	112-95-8	1507.84	282.329
17.2347	Eicosane	81.1443	C20H42	112-95-8	846552	282.329
23.0195	Eicosane	60.1399	C20H42	112-95-8	48141.3	282.329
12.9664	Eicosane	51.3477	C20H42	112-95-8	2054.35	282.329
27.4716	Estra-1,3,5(10)-trien-17-one, 2-[(trimethylsilyl)amino]-3-[(trimethylsilyl)oxy]-	60.4908	C24H39NO2Si2	77883-26-2	301256	429.252
23.8346	Estra-1,3,5(10)-triene-6,17-dione, 3,11-bis(acetyloxy)-, (11.beta.)-	56.8028	C22H24O6	77882-93-0	18929.4	384.157
7.06435	Ethanol, 2-(octyloxy)-	52.0361	C10H22O2	10020-43-6	130753	174.162
10.3832	Ethanolamine, 3TMS derivative	76.9229	C11H31NOSi3	5630-81-9	511934	277.171
10.494	Ethyl 2-[bis(2-ethoxyethyl)amino]acetate	59.6396	C12H25NO4	1000378-72-1	274359	247.178
5.13274	Ethyl iso-allocholate	56.0443	C26H44O5	1000043-05-3	646648	436.319
35.0971	Ethylamine, N,N-diundecyl-2-(2-thiophenyl)-	61.8595	C28H53NS	1000310-35-1	63612.6	435.39
5.37546	Ethylene glycol, 2TMS derivative	84.7642	C8H22O2Si2	7381-30-8	1.06148e+06	206.116
21.7322	Fumaric acid, 4-octyl 2,2,3,3,4,4,5,5-octafluoropentyl ester	52.9679	C17H22F8O4	1000405-62-0	73417.4	442.139
29.5666	Galactinol, nonakis(trimethylsilyl) ether	54.0957	C39H94O11Si9	1000380-09-4	416508	990.472
29.1095	Glycerol monostearate, 2TMS derivative	89.1055	C27H58O4Si2	1188-75-6	3.91532e+06	502.387
10.5062	Glycerol, 3TMS derivative	86.8612	C12H32O3Si3	6787-10-06	6.31236e+06	308.166
11.6888	Glycine, 2-cyclohexyl-N-(but-3-en-1-yl)oxycarbonyl-, hexyl ester	50.3272	C19H33NO4	1000383-24-3	50136.9	339.241
32.4499	Glycine, 2-cyclohexyl-N-(but-3-yn-1-yl)oxycarbonyl-, decyl ester	54.2176	C23H39NO4	1000383-19-1	463044	393.288
11.0567	Glycine, 3TMS derivative	87.8075	C11H29NO2Si3	5630-82-0	1.97084e+06	291.151
14.5684	Glycine, N-ethyl-n-propargyloxycarbonyl-, hexyl ester	52.6253	C14H23NO4	1000323-36-1	230895	269.163
6.9683	Glycolic acid, 2TMS derivative	62.8904	C8H20O3Si2	33581-77-0	8757.61	220.095
14.74	Glycylglutamic acid, 2TMS derivative	54.3294	C13H28N2O5Si2	1000333-69-4	403839	348.154
10.5873	Grandidentatin, pentaacetate	54.4418	C31H38O14	18265-34-4	83219.2	634.226
10.6161	Heneicosane	74.4875	C21H44	629-94-7	699877	296.344
22.5313	Heneicosane	69.7263	C21H44	629-94-7	1.09317e+06	296.344
13.6191	Heptadecane	57.8366	C17H36	629-78-7	177609	240.282
16.5011	Heptadecane, 7-methyl-	51.4632	C18H38	20959-33-5	149995	254.297
8.65942	Heptadecane, 8-methyl-	64.1459	C18H38	13287-23-5	228084	254.297
22.7798	Heptadecanoic acid, TMS derivative	79.9313	C20H42O2Si	55517-58-3	2.19015e+07	342.295
6.38261	Heptafluorobutyric acid, 3,5-dimethylphenyl ester	53.1218	C12H9F7O2	1000307-62-9	76386.3	318.049
20.9997	Heptasiloxane, hexadecamethyl-	58.0195	C16H48O6Si7	541-01-5	218155	532.184
30.6081	Heptasiloxane, hexadecamethyl-	53.4197	C16H48O6Si7	541-01-5	330126	532.184
14.0584	Hexadecane	50.2412	C16H34	544-76-3	119490	226.266
14.1222	Hexadecane, 2,6,11,15-tetramethyl-	71.7172	C20H42	504-44-9	1.4136e+06	282.329
10.2413	Hexadecane, 7-methyl-	68.1806	C17H36	26730-20-1	1360.65	240.282
6.03845	Hexane, 3-ethyl-3-methyl-	54.9346	C9H20	3074-76-8	190910	128.157
14.8898	Hexanoic acid, 6-(4-cyanophenyl)-2-naphthalenyl ester	70.5064	C23H21NO2	80493-99-8	116787	343.157
30.2521	Hydrocortisone 21-acetate, bis(O-ethyloxime)	52.4489	C27H42N2O6	1000394-54-5	345580	490.304
9.6429	Indane, 1-nonyl-	52.8764	C18H28	29138-83-8	448577	244.219
8.10137	Indole, 3,3'-selenodi-	59.3516	C16H12N2Se	14293-12-0	45510	312.017
27.1637	Inosine, 4TMS derivative	85.3057	C22H44N4O5Si4	1000332-74-7	2.90075e+06	556.239
27.3657	JWH 250 5-hydroxyindole metabolite	63.7641	C22H25NO3	1000386-11-2	298988	351.183
14.5562	L-5-Oxoproline, , 2TMS derivative	86.8823	C11H23NO3Si2	30274-77-2	9.35655e+06	273.122
7.45785	L-Alanine, 2TMS derivative	87.2995	C9H23NO2Si2	27844-07-1	4.16665e+06	233.127
35.3702	l-Alanine, n-pentadecafluorooctanoyl-, butyl ester	61.6461	C15H14F15NO3	1000327-90-9	40451.4	541.073
14.5351	L-Aspartic acid, 3TMS derivative	69.7804	C13H31NO4Si3	55268-53-6	680431	349.156
13.7433	L-Aspartic acid, 3TMS derivative	71.004	C13H31NO4Si3	55268-53-6	383604	349.156
16.026	L-Glutamic acid, 3TMS derivative	86.3786	C14H33NO4Si3	15985-07-6	1.60795e+06	363.172
10.8422	L-Isoleucine, 2TMS derivative	64.2727	C12H29NO2Si2	7483-92-3	214457	275.174
16.1141	L-Phenylalanine, 2TMS derivative	53.3688	C15H27NO2Si2	7364-51-4	113959	309.158
14.8282	l-Proline, n-heptafluorobutyryl-, propyl ester	53.8223	C12H14F7NO3	1000321-09-7	42820.2	353.086
12.3847	L-Threonine, 3TMS derivative	79.7761	C13H33NO3Si3	7537-02-02	357976	335.177
15.7869	L-Valine, N-(3,4-difluorobenzoyl)-, nonyl ester	55.8995	C21H31F2NO3	1000346-50-6	72316.5	383.227
14.0389	Malic acid, 3TMS derivative	79.9854	C13H30O5Si3	38166-11-9	979896	350.14
6.99244	Malonic acid, di(2-decyl) ester	50.0847	C23H44O4	1000349-10-1	886.226	384.324
34.9274	Methyl 2-[2-(4-chlorophenyl)-5-methyl-1H-imidazol-1-yl]dithiobenzoate	50.5499	C18H15ClN2S2	105251-31-8	82704.5	358.037
33.9247	Methyl 2-[2-(4-chlorophenyl)-5-methyl-1H-imidazol-1-yl]dithiobenzoate	51.2939	C18H15ClN2S2	105251-31-8	36417.3	358.037
6.10634	Methylamine, N-(1-propylbutylidene)-	53.5987	C8H17N	10599-78-7	660285	127.136
13.9653	Methyltris(trimethylsiloxy)silane	54.5132	C10H30O3Si4	17928-28-8	27818.5	310.127
6.24361	Methyltris(trimethylsiloxy)silane	86.0935	C10H30O3Si4	17928-28-8	1.05201e+06	310.127
26.0538	Myo-Inositol, 1,3,4,5,6-pentakis-O-(trimethylsilyl)-, bis(trimethylsilyl) phosphate	60.5199	C27H69O9PSi7	33910-06-4	143088	764.306
22.0571	Myo-Inositol, 6TMS derivative	89.5637	C24H60O6Si6	2582-79-8	1.3009e+06	612.301
19.2112	Myristic acid, TMS derivative	60.6541	C17H36O2Si	18603-17-3	127559	300.248
29.139	N-(2,6-Dichlorophenyl)-2,2-difluoro-2-(2,3,3,4,4,5,5-heptafluorotetrahydrofuran-2-yl)acetamide	51.2921	C12H4Cl2F9NO2	1000311-96-5	103833	434.948
9.04659	N-(Heptafluorobutyryl)alanine propyl ester	56.4721	C10H12F7NO3	88436-01-5	9273.58	327.071
10.789	Naphthalene-2,6-dicarboxylic acid, bis-(4-cyanophenyl ester	54.8534	C26H14N2O4	1000192-39-7	572069	418.095
10.9903	n-Butyl isopentyl disulphide	51.4456	C9H20S2	75679-09-3	190425	192.101
14.1249	Niacinamide, TBDMS derivative	60.7945	C12H20N2OSi	1000374-74-4	554676	236.134
8.52746	Nicotinonitrile, 1,2-dihydro-6-methyl-2-oxo-4-phenethyl-	54.8927	C15H14N2O	20637-21-2	116275	238.111
11.4147	Nonadecane	62.9669	C19H40	629-92-5	368316	268.313
7.49944	Nonane, 4,5-dimethyl-	75.0674	C11H24	17302-23-7	1.1182e+06	156.188
6.05251	o-(p-Nitrophenyl) 1-azetidinecarbothioate	55.0857	C10H10N2O3S	10554-22-0	237597	238.041
19.0577	Octacosane, 1-iodo-	61.3197	C28H57I	1000406-32-2	82404	520.351
18.6093	Octadecane	60.5498	C18H38	593-45-3	520955	254.297
5.29757	Octane, 2-methyl-	53.3074	C9H20	3221-61-2	169522	128.157
23.6663	Oleic Acid, (Z)-, TMS derivative	65.5703	C21H42O2Si	21556-26-3	308484	354.295
22.7883	o-Tolyl acetone 2,4-dinitrophenylhydrazone	51.6217	C16H16N4O4	1000241-20-4	261140	328.117
6.55614	Oxalic acid, isohexyl neopentyl ester	56.7855	C13H24O4	1000309-73-0	27808.8	244.167
23.8809	Oxazole, 2-[1,1'-biphenyl]-4-yl-5-phenyl-	61.1759	C21H15NO	852-37-9	457234	297.115
21.6344	Palmitic Acid, TMS derivative	85.058	C19H40O2Si	55520-89-3	4.57495e+07	328.28
20.9203	Pantothenic acid tritms	55.0144	C18H41NO5Si3	1000331-78-2	67436.6	435.229
6.70387	p-Chlorophenyl (2-(p-phenetidino)ethyl)carbamate	50.3311	C17H19ClN2O3	101596-14-9	1234.59	334.108
8.6147	Pentasiloxane, dodecamethyl-	83.5609	C12H36O4Si5	141-63-9	182421	384.146
6.35643	Perfluoro-2-azapropene	51.3591	C2F5N	1000322-34-6	9571.6	132.995
23.5851	Petroselinic acid, TMS derivative	67.0622	C21H42O2Si	96851-53-5	118450	354.295
17.472	Phosphoric acid, 2-(trimethylsiloxy)-1-[(trimethylsiloxy)methyl]ethyl bis(trimethylsilyl) ester	58.1378	C15H41O6PSi4	31038-12-7	80150.2	460.172
17.9835	Phosphoric acid, bis(trimethylsilyl) 2,3-bis[(trimethylsilyl)oxy]propyl ester	82.3459	C15H41O6PSi4	31038-11-6	75760.7	460.172
8.79891	Phosphoric acid, bis(trimethylsilyl)monomethyl ester	80.2456	C7H21O4PSi2	18291-81-1	993915	256.072
18.259	Phosphorylethanolamine, 4TMS derivative	67.6946	C14H40NO4PSi4	55334-92-4	562398	429.177
9.01872	Phthalic acid, 4-methoxyphenyl propyl ester	51.8752	C18H18O5	1000309-77-7	533.851	314.115
24.2407	Phthalimide, N-(methylthio)carbonyl-	50.4628	C10H7NO3S	1000156-65-6	278011	221.015
20.0183	Piperazine, 1-[5-fluoropentyl]-4-[(3,4-dichlorophenyl)acetyl]-	57.1266	C17H23Cl2FN2O	141044-94-2	97073.2	360.117
21.3993	p-Methoxybenzylidene p-biphenylamine	67.839	C20H17NO	25543-63-9	34164.8	287.131
31.9311	Pregn-5-en-20-one, 3-[(tripropylsilyl)oxy]-, (3.beta.)-	51.4286	C30H52O2Si	65598-99-4	153280	472.374
33.8895	propanedinitrile, 2-(1-methyl-2,6-diphenyl-4(1H)-pyridinylidene)-	57.9258	C21H15N3	1000402-23-7	133218	309.127
27.4169	propanedinitrile, 2-[[4-(diphenylamino)-1-naphthalenyl]methylene]-	50.3251	C26H17N3	1000398-62-7	97588.5	371.142
31.8982	propanedinitrile, 2-[2-methyl-6-[2-(2,3,6,7-tetrahydro-1H,5H-benzo[ij]quinolizin-9-yl)ethenyl]-4H-pyran-4-ylidene]-	50.4614	C23H21N3O	1000402-55-1	70345	355.168
33.7063	Propanenitrile, 2,3-dibromo-	51.093	C3H3Br2N	4554-16-9	84218.3	210.863
16.8323	Propenone, 3-(2-ethoxyphenyl)-1-(5-fluoro-3-methylbenzofuran-2-yl)-	51.1718	C20H17FO3	1000302-78-4	43223.4	324.116
5.62575	Propylene glycol, 2TMS derivative	52.2379	C9H24O2Si2	17887-27-3	100338	220.131
21.6105	p-Sulfanilylbenzenesulfonamide	50.9049	C12H12N2O4S2	1000257-07-3	327000	312.024
10.8048	Pyrazinoic acid, TBDMS derivative	65.8149	C11H18N2O2Si	1000373-07-6	1.48062e+06	238.114
27.7558	Pyrene, 1,9-dimethyl-	53.6779	C18H14	74298-70-7	238768	230.11
9.17369	Pyrido[2,3-d]pyrimidin-4(1H)-one	50.3629	C7H5N3O	24410-19-3	121247	147.043
6.10336	Pyrimidine, 2-fluoro-5-chloro-4-amino-	55.3188	C4H3ClFN3	155-10-2	1.13679e+06	147
10.058	Pyrrole, 1-methyl-2-(trifluoromethyl)-	54.5114	C6H6F3N	67095-61-8	186823	149.045
5.38612	S(IV)Thiirane-2-carboxylic acid, 2-amino-1-ethyl-	60.4595	C5H11NO2S	1000191-69-6	118324	149.051
6.52301	S(IV)Thiirane-2-carboxylic acid, 2-amino-1-ethyl-	50.9344	C5H11NO2S	1000191-69-6	27152.9	149.051
11.9724	Serine, 3TMS derivative	76.6965	C12H31NO3Si3	64625-17-8	800345	321.161
19.2125	Silane diethyl(2-chloro-5-methylphenoxy)pentyloxy-	50.5102	C16H27ClO2Si	1000363-40-7	161338	314.147
27.4894	Silane, (3-chlorophenyloxy)dimethylundecyloxy-	50.5385	C19H33ClO2Si	1000346-88-3	179638	356.194
8.53624	Silane, cyclohexyldimethoxymethyl-	87.6946	C9H20O2Si	17865-32-6	1.46106e+06	188.123
20.2322	Silane, diethyl(3-phenylpropoxy)undecyloxy-	63.9065	C24H44O2Si	1000363-15-1	89180.7	392.311
22.7713	Silane, diethyldecyloxyheptyloxy-	53.0528	C21H46O2Si	1000363-95-4	269088	358.327
27.7265	Silane, diethyldecyloxyoctadecyloxy-	52.038	C32H68O2Si	1000363-33-3	121972	512.499
27.7192	Silane, diethylheptadecyloxy(1-naphthoxy)-	55.1654	C31H52O2Si	1000363-81-0	87197.5	484.374
13.9222	Silane, diethylheptadecyloxy(2-phenylethoxy)-	72.9149	C29H54O2Si	1000363-17-2	109926	462.389
33.6043	Silane, diethylheptyloxytridecyloxy-	60.6045	C24H52O2Si	1000363-95-6	92373	400.374
33.1981	Silane, diethylisohexyloxy(pentafluorobenzyloxy)-	54.2707	C17H25F5O2Si	1000363-22-2	247563	384.154
29.7574	Silane, diethyloctyloxypentadecyloxy-	70.927	C27H58O2Si	1000363-96-4	37867.4	442.421
27.4744	Silane, dimethyl(4-phenylphenoxy)octyloxy-	51.1128	C22H32O2Si	1000347-49-1	128792	356.217
22.4891	silane, dimethyl(octadecyloxy)-	51.5442	C20H44OSi	1000402-38-9	20978	328.316
33.6413	Silane, dimethylisobutoxyheptadecyloxy-	53.9817	C23H50O2Si	1000346-77-6	69094.3	386.358
24.2902	Silane, dimethylpentyloxytridecyloxy-	61.8268	C20H44O2Si	1000346-83-1	64847	344.311
21.6896	Silane, methylvinyl(hept-4-yloxy)undecyloxy-	64.8117	C21H44O2Si	1000416-97-9	1003.34	356.311
22.8422	Silane, methylvinyl(heptyloxy)decyloxy-	55.4302	C20H42O2Si	1000416-86-5	21976.6	342.295
10.6261	Silane, methylvinyl(pent-2-yloxy)dodecyloxy-	50.2176	C20H42O2Si	1000416-28-9	914262	342.295
10.4531	Silanol, trimethyl-, phosphate (3:1)	85.086	C9H27O4PSi3	10497-05-9	1.54559e+07	314.095
19.8302	Silanol, trimethyl-, phosphate (3:1)	50.0521	C9H27O4PSi3	10497-05-9	43611	314.095
16.5599	Silanol, trimethyl-, pyrophosphate (4:1)	57.5515	C12H36O7P2Si4	18395-45-4	63196.9	466.101
23.8716	Stearic acid, TMS derivative	88.5672	C21H44O2Si	18748-91-9	2.30496e+07	356.311
35.1259	Succinic acid, 2-(2-chlorophenoxy)ethyl dodecyl ester	51.7549	C24H37ClO5	1000381-54-3	6821.17	440.233
21.8217	Succinic acid, 2-(2-chlorophenoxy)ethyl dodecyl ester	51.6139	C24H37ClO5	1000381-54-3	97806.2	440.233
15.7532	Succinic acid, di(4-chlorophenyl) ester	55.2061	C16H12Cl2O4	1000330-03-1	588778	338.011
10.4728	Succinic acid, dodec-2-en-1-yl 4-chloro-2-methoxyphenyl ester	59.7203	C23H33ClO5	1000390-94-6	357917	424.202
9.0024	Succinic acid, hept-2-yl 2-fluoroethyl ester	57.8973	C13H23FO4	1000390-88-0	1463.04	262.158
10.8279	Sulazepam	62.8703	C16H13ClN2S	2898-13-7	119978	300.049
12.1594	Sulazepam	59.661	C16H13ClN2S	2898-13-7	1425.14	300.049
10.7676	Sulfurous acid, hexyl 2-pentyl ester	51.3811	C11H24O3S	1000309-15-6	142286	236.145
14.2198	Sulfurous acid, isohexyl pentyl ester	52.6872	C11H24O3S	1000309-14-0	40143.8	236.145
7.71759	Terephthalaldehydic acid, methyl ester, p-(O-methyloxime)	50.0049	C10H11NO3	33499-35-3	44994.1	193.074
27.4986	tert-Butyldimethylsilyl 4-methyl-2-((2,2,3,3,3-pentafluoropropanoyl)oxy)benzoate	54.8594	C17H21F5O4Si	1000385-88-9	367809	412.113
30.8546	Tetracosamethyl-cyclododecasiloxane	68.4112	C24H72O12Si12	18919-94-3	376276	888.226
28.68	Tetracosamethyl-cyclododecasiloxane	76.9657	C24H72O12Si12	18919-94-3	309583	888.226
31.9202	Tetracosamethyl-cyclododecasiloxane	60.9222	C24H72O12Si12	18919-94-3	244693	888.226
23.4116	Tetracosamethyl-cyclododecasiloxane	79.168	C24H72O12Si12	18919-94-3	394892	888.226
29.8077	Tetracosamethyl-cyclododecasiloxane	73.6946	C24H72O12Si12	18919-94-3	370502	888.226
18.2834	Tetracosamethyl-cyclododecasiloxane	54.78	C24H72O12Si12	18919-94-3	87481.8	888.226
17.8436	Tetracosane	57.9436	C24H50	646-31-1	83547.4	338.391
10.5138	Tetracyano-p-quinodimethane	55.6478	C12H4N4	1518-16-7	214710	204.044
12.7364	Tetradecane	80.4916	C14H30	629-59-4	398100	198.235
20.7342	Tetraethyl 2,7,12,17-tetramethyl-21H,23H-porphine-3,8,13,18-tetrapropionate	52.9641	C44H54N4O8	54090-83-4	1128.39	766.394
6.57649	Tetrasiloxane, decamethyl-	62.1123	C10H30O3Si4	141-62-8	94731.2	310.127
6.00761	Trichloroethanol, TMS derivative	51.5027	C5H11Cl3OSi	41262-38-8	110924	219.964
12.8943	Tridecane, 3-methyl-	60.688	C14H30	6418-41-3	140179	198.235
15.8383	Tridecane, 5-methyl-	67.3148	C14H30	25117-31-1	443338	198.235
7.49142	Trimethylsilyl cyanide	59.5129	C4H9NSi	7677-24-9	329803	99.05
11.3427	Trisiloxane, octamethyl-	67.1625	C8H24O2Si3	107-51-7	1.52355e+06	236.108
12.7753	Tromethamine, 3TMS derivative	78.3563	C13H35NO3Si3	1000366-66-0	341558	337.192
14.3706	Tromethamine, 4TMS derivative	76.5344	C16H43NO3Si4	136281-54-4	382192	409.232
9.53402	Undecane, 2,6-dimethyl-	73.8402	C13H28	17301-23-4	221662	184.219
5.72696	Undecane, 6,6-dimethyl-	62.7064	C13H28	17312-76-4	297587	184.219
11.6026	Uracil, 2TMS derivative	70.8964	C10H20N2O2Si2	10457-14-4	90169.5	256.106
10.0718	Urea, 2TMS derivative	80.6733	C7H20N2OSi2	18297-63-7	2.74337e+06	204.111
11.765	Urea, N-(2-chloroethyl)-N'-(5-fluoromethyl-2,2-dimethyl-1,3-dioxan-5-yl)-	51.3073	C10H18ClFN2O3	151917-77-0	46495.3	268.099
25.9648	Uridine, 3TMS derivative	51.6006	C18H36N2O6Si3	10457-16-6	87377.4	460.188
17.1871	Xylitol, 5TMS derivative	64.6695	C20H52O5Si5	14199-72-5	477062	512.266
16.7992	Xylulose, o-methyloxime, tetrakis-O-(trimethylsilyl)-	51.2043	C18H45NO5Si4	1000298-66-1	100997	467.237

## Sheet: Supplementary table 7
Retention Time (RT)	Metabolites	% similarity	Molecular Formula	CAS Number	Peak Area	Molecular Weight (MW)
8.49807	(.+/-.)-3-Hydroxybutyric acid, 2TMS derivative	83.9168	C10H24O3Si2	1000333-75-4	1.22663e+06	248.126
7.72364	(2S,3R)-3-[(4E,7E)-Nona-4,7-dienoyl]-N,N-bis(trimethylsilyl)oxirane-2-carboxamide	60.8717	C18H33NO3Si2	1000395-61-1	1.38198e+06	367.2
19.0891	(4-Methoxy-3-nitro-phenyl)-naphthalen-2-yl-diazene	56.3677	C17H13N3O3	1000189-19-6	43151.8	307.096
35.9095	(5-Methylsulfanyl-2H-[1,2,4]triazol-3-yl)(thiophen-2-ylmethyl)amine	50.8478	C8H10N4S2	1000316-82-0	169260	226.035
12.3862	(R*,R*)-2,3-Dihydroxybutanoic acid, tris(trimethylsilyl)-	56.4661	C13H32O4Si3	1000099-89-5	33817.8	336.161
25.4386	.alpha.-D-Glucopyranose, 2,3,4,6-tetrakis-O-(trimethylsilyl)-, bis(trimethylsilyl) phosphate	53.2549	C24H61O9PSi6	55520-79-1	89161.7	692.267
20.7511	.beta.-D-Allopyranose, 5TMS derivative	77.9826	C21H52O6Si5	1000380-16-2	1.40877e+06	540.261
19.6716	.beta.-d-Glucopyranoside, 2-[[4-(trimethylsilyl)oxy]phenyl]ethyl, tetrakis(trimethylsilyl)	50.9742	C29H60O7Si5	1000115-98-2	467279	660.319
24.2445	.beta.-D-Glucopyranuronic acid, 5TMS derivative	59.9965	C21H50O7Si5	52842-24-7	474881	554.24
34.5658	.beta.-Sitosterol, TMS derivative	50.7267	C32H58OSi	2625-46-9	45794	486.426
10.6223	[1,2,4]Oxadiazole, 5-(4-tert-butylphenoxymethyl)-3-(thiophen-2-yl)-	60.4538	C17H18N2O2S	1000304-93-9	215469	314.109
25.5359	[1,2,4]Oxadiazole, 5-(4-tert-butylphenoxymethyl)-3-(thiophen-2-yl)-	51.9605	C17H18N2O2S	1000304-93-9	6209.92	314.109
18.4673	[1]Benzothiopyrano[4,3-b]benzo[e]indole	50.8276	C19H11NS	846-35-5	384.125	285.061
35.6099	[2-Hydroxy-3-(4-tolyl)-1,2-dihydroquinoxalin-1-yl]phenyl[1-benzyl-3-(4-tolyl)-1,2-dihydroquinoxalin-2-yl]methane	50.9077	C44H38N4O	91736-73-1	43304.5	638.305
32.4415	1-(3-Methylbutyl)-2,3,5-trimethylbenzene	57.3989	C14H22	107997-60-4	3.26879e+07	190.172
30.5665	1-(4-Methoxyphenyl)2,3-diphenyl-prop-2-en-1-one	53.0228	C22H18O2	1000146-24-7	22660.2	314.131
35.4564	1,1'-Di-tert-butyl-ferrocene	53.092	C18H26Fe	1000148-69-0	96202.1	298.138
7.94658	1,2-Bis[4-(dimethylamino)phenyl]-1-ethanone	62.9593	C18H22N2O	41327-20-2	128897	282.173
10.7808	1,3,4-Oxadiazole, 2-[1,1'-biphenyl]-4-yl-5-phenyl-	55.9238	C20H14N2O	852-38-0	13504.3	298.111
11.0236	1,3,4-Oxadiazole, 2-[1,1'-biphenyl]-4-yl-5-phenyl-	64.7064	C20H14N2O	852-38-0	15903.6	298.111
8.14991	1,3,5-Triazine, 2,4,6-trifluoro-	60.6831	C3F3N3	675-14-9	153093	135.004
10.4238	1,3-Benzenediol, 4-bromo-	58.1863	C6H5BrO2	6626-15-9	10681.7	187.947
23.9621	1,3-Bis-(p-carbamoylmethylphenoxy)-2-propanol	57.7375	C19H22N2O5	1000122-55-9	119209	358.153
19.7266	1,3-Butanediol, 2TMS derivative	57.6033	C10H26O2Si2	56771-47-2	3.4056e+07	234.147
10.5175	1,3-Dimethyl-4,5,5-tris(methoxycarbonyl)isoxazolidine	54.8652	C11H17NO7	1000283-49-4	217132	275.101
8.69715	1,3-dioxane-5,5-dimethanol, 2-butyl-	50.5104	C10H20O4	1000396-07-3	27827.2	204.136
31.7123	1,3-Dioxolane, 2,2-dimethyl-4-[(octadecyloxy)methyl]-	50.9887	C24H48O3	16725-43-2	71683.2	384.36
19.7163	1,3-Diphenyl-2-azafluorene	69.3987	C24H17N	57162-74-0	1.21969e+07	319.136
19.7333	1,3-Oxathiolane, 2-[[(2-chloroethyl)thio]methyl]-2-methyl-	56.9524	C7H13ClOS2	117239-00-6	5.23329e+06	212.01
16.7186	1,4-benzenediamine, N4,N4-dimethyl-2-[(4-methylphenyl)sulfonyl]-	59.3156	C15H18N2O2S	1000402-03-4	48650	290.109
19.167	1,5-Anhydrohexitol, 4TMS derivative	66.5445	C18H44O5Si4	1000380-13-8	637822	452.227
10.4918	1,7-Phenazinediamine	51.8558	C12H10N4	28124-29-0	8771.92	210.091
20.7361	1,8-naphthyridine, 2-phenyl-	56.5375	C14H10N2	1000400-51-1	4766.43	206.084
16.9132	10H-Phenoxaphosphine, 2-chloro-8-ethyl-10-hydroxy-, 10-oxide	52.325	C14H12ClO3P	36360-90-4	977.951	294.021
35.0176	16-Methyl-heptadecane-1,2-diol, isopropylidene derivative	50.1173	C21H42O2	1000336-66-9	119139	326.318
10.1716	1-Acetyl-2-cyanoacetylhydrazine	51.6304	C5H7N3O2	55819-76-6	1447.87	141.054
29.5735	1-Aminocyclopentanecarboxylic acid, 3-chloropropoxycarbonyl-, dodecyl ester	50.8057	C22H40ClNO4	1000392-62-9	220959	417.265
9.3565	1-Azabicyclo[2.2.2]oct-3-yl 2-thiophenecarboxylate	55.738	C12H15NO2S	1000298-02-6	15419.1	237.082
22.7813	1-Cyclohexyldimethylsilyloxyoctadecane	66.1558	C26H54OSi	1000281-96-8	1.86281e+06	410.394
10.9094	1-Dichloromethyl(dimethyl)silyloxyhexadecane	50.4796	C19H40Cl2OSi	1000279-98-1	37331	382.223
19.7568	1-Diphenyl(tert-butyl)silyloxy-4-nitrobenzene	72.842	C22H23NO3Si	1000307-86-9	28994	377.145
32.1628	1H-Cyclopropa[3,4]benz[1,2-e]azulene-4a,5,7b,9,9a(1aH)-pentol, 3-[(acetyloxy)methyl]-1b,4,5,7a,8,9-hexahydro-1,1,6,8-tetramethyl-, 5,9,9a-triacetate, [1aR-(1a.alpha.,1b.beta.,4a.beta.,5.beta.,7a.alpha.,7b.alpha.,8.alpha.,9.beta.,9a.alpha.)]-	52.4329	C28H38O10	77698-37-4	646867	534.247
25.1839	1H-Cyclopropa[3,4]benz[1,2-e]azulene-5,7b,9,9a-tetrol, 1a,1b,4,4a,5,7a,8,9-octahydro-3-(hydroxymethyl)-1,1,6,8-tetramethyl-, 5,9,9a-triacetate, [1aR-(1a.alpha.,1b.beta.,4a.beta.,5.beta.,7a.alpha.,7b.alpha.,8.alpha.,9.beta.,9a.alpha.)]-	56.3923	C26H36O8	77508-64-6	15815.7	476.241
34.7566	1H-Cyclopropa[3,4]benz[1,2-e]azulene-5,7b,9,9a-tetrol, 3-[(acetyloxy)methyl]-1a,1b,4,4a,5,7a,8,9-octahydro-1,1,6,8-tetramethyl-, 9,9a-diacetate, [1aR-(1a.alpha.,1b.beta.,4a.alpha.,5.beta.,7a.alpha.,7b.alpha.,8.alpha.,9.beta.,9a.alpha.)]-	50.975	C26H36O8	77550-15-3	728043	476.241
12.579	1-Hexadecanol, TMS derivative	54.1315	C19H42OSi	6221-90-5	10370.4	314.3
10.9143	1-Hexanamine, 2-ethyl-N-(2-ethylhexyl)-	58.9479	C16H35N	106-20-7	25670.8	241.277
14.4129	1H-Indol-2-one, 2,3-dihydro-1-acetyl-3-(5-methylthio-2-furfurylidene)-	53.0717	C16H13NO3S	64259-23-0	16617.1	299.062
33.5398	1H-Indole, 3-(2-hydroxyethyl)-2-phenyl-	50.0804	C16H15NO	57642-28-1	33656.9	237.115
27.4375	1H-Phenanthro[9,10-d]imidazole, 1,2-diphenyl-	54.1091	C27H18N2	16408-28-9	211982	370.147
22.9218	1H-Pyrazole-5-carboxamide, 3-cyclopropyl-N-(3,5-dimethyltricyclo[3.3.1.1(3,7)]dec-1-yl)-1-methyl-	63.9458	C20H29N3O	1000350-11-6	70323.3	327.231
35.155	1'-Hydroxycannabinol	51.4382	C21H26O3	1000299-00-0	183742	326.188
17.8725	1-Isobutylsulfanylmethyl-2,8,9-trioxa-5-aza-1-sila-bicyclo[3.3.3]undecane	65.1213	C11H23NO3SSi	69821-15-4	138507	277.117
10.3809	1-Isobutylsulfanylmethyl-2,8,9-trioxa-5-aza-1-sila-bicyclo[3.3.3]undecane	64.7861	C11H23NO3SSi	69821-15-4	208388	277.117
35.9944	1-Methanesulfonyl-5-fluorouracil	51.0055	C5H5FN2O4S	54391-00-3	11173.9	207.995
11.7861	1-Methyl-5-iodouracil	50.4023	C5H5IN2O2	45774-47-8	619.812	251.94
15.03	1-Methyl-N,N-bis(trimethylsilyl)-4-[(trimethylsilyl)oxy]-1H-imidazol-2-amine	63.9532	C13H31N3OSi3	1000333-94-6	146967	329.177
27.3375	1-Monopalmitin, 2TMS derivative	82.8798	C25H54O4Si2	1188-74-5	4.37186e+06	474.356
23.868	1-Triethylsilyloxyheptadecane	76.9746	C23H50OSi	1000283-13-6	1.90867e+06	370.363
10.0855	2-((3-Methylbutan-2-yloxy)carbonyl)benzoic acid	59.1871	C13H16O4	198284-10-5	2.15813e+06	236.105
34.0112	2-(4-Methoxy-phenoxy)-6-methyl-4-phenyl-quinazoline	52.4078	C22H18N2O2	1000317-86-4	109575	342.137
9.47667	2-(Dibromomethane)-1-methyl-5-nitroimidazole	53.4098	C5H5Br2N3O2	1000124-02-4	116496	296.875
33.2532	2-(Heptanoylamino)-benzothiazole	50.2473	C14H18N2OS	121189-74-0	11610.3	262.114
9.48271	2-(Isopropylamino)ethanol, 2TMS derivative	71.3991	C11H29NOSi2	1000373-29-6	679858	247.179
19.6602	2,2'-Methylenedithiophene	51.5671	C9H8S2	4341-34-8	157740	180.007
20.2296	2,4,6(1H,3H,5H)-pyrimidinetrione, 5-bromo-5-butyl-	51.7033	C8H11BrN2O3	1000396-84-3	161808	261.995
10.3094	2,4,6-Trimethylbenzonitrile	55.9207	C10H11N	1000411-42-7	55875.4	145.089
10.7433	2,4-Diamino-6-[[m-methoxyphenyl]thio]quinazoline	50.0425	C15H14N4OS	51124-01-7	88049.5	298.089
15.7917	2,4'-Dihydroxy-stilbene	50.2536	C14H12O2	1000147-73-5	22101.2	212.084
10.3957	2,4-Dimethyldodecane	75.5784	C14H30	6117-99-3	162409	198.235
8.78668	2,5-Di(trifluoromethyl)benzoic acid, 5-pentadecyl ester	62.259	C24H34F6O2	1000338-71-2	102656	468.246
10.2336	2,6,10-Trimethyltridecane	50.9975	C16H34	3891-99-4	58537.5	226.266
12.0276	2,6-Adamantanedione, 4-iodo-, (1R)-	53.9304	C10H11IO2	19305-95-4	213234	289.98
35.9308	2,6-Difluoro-3-methylbenzoic acid, 4-chloro-2-methylphenyl ester	54.2499	C15H11ClF2O2	1000343-75-7	59618.1	296.042
9.40402	2,6-Difluorotoluene	59.6966	C7H6F2	443-84-5	16504.3	128.044
7.60537	2,6-Dimethyldecane	57.2315	C12H26	13150-81-7	80406.1	170.203
6.49581	2,8,9-Trioxa-5-aza-1-silabicyclo[3.3.3]undecane, 1-ethenyl-	56.4305	C8H15NO3Si	2097-18-9	298440	201.082
31.4217	2-[2-[2-[2-[2-(2,2,3,3,3-Pentafluoropropanoyl)oxyethoxy]ethoxy]ethoxy]ethoxy]ethyl 2,2,3,3,3-pentafluoropropanoate	63.4942	C16H20F10O8	1000351-99-7	119359	530.1
35.8325	20,21-Dinoraspidospermidine, 17-methoxy-, (5.xi.,19.xi.)-	54.042	C18H24N2O	36459-11-7	46055.3	284.189
29.5755	2-Aminocaprylic acid, N-(2-methoxyethylcarbonyl)-, pentyl ester	50.962	C17H33NO5	1000327-76-9	11513.5	331.236
5.34634	2-Benzylidene-coumaran-3-one	57.0987	C15H10O2	1000403-52-7	73856.2	222.068
33.3232	2-Butanone, 1,1'-(1,3-dithietane-2,4-diylidene)bis[3,3-dimethyl-	51.2717	C14H20O2S2	19018-14-5	428373	284.09
7.07304	2-Eicosanol	50.5163	C20H42O	4340-76-5	3237.69	298.324
31.2146	2-Furancarboxamide, N-[4-(2-furoylamino)phenyl-,	54.2231	C16H12N2O4	1000294-48-0	74146.8	296.08
35.4203	2H,8H-Benzo[1,2-b:5,4-b']dipyran-2-one, 5-methoxy-8,8-dimethyl-10-(3-methyl-2-butenyl)-	64.2615	C20H22O4	55334-39-9	135624	326.152
14.5665	2H-1-Benzopyran-2-one, 7-methoxy-6-[3-(1-methylethenyl)oxiranyl]-, trans-	53.8238	C15H14O4	23631-16-5	237304	258.089
27.3242	2H-1-benzopyran-6-ol, 7-(1,1-dimethylethyl)-2-(4,8-dimethylnonyl)-3,4-dihydro-2-methyl-	52.0842	C25H42O2	1000398-66-5	45635	374.318
11.3316	2'-Hydroxy-6'-methoxyacetophenone, TBDMS derivative	54.2278	C15H24O3Si	1000352-92-7	158953	280.149
32.4127	2-Hydroxy-benzoic acid, N'-acridin-9-yl-hydrazide	52.1179	C20H15N3O2	1000317-39-7	358353	329.116
28.802	2-Monostearin, 2TMS derivative	65.7683	C27H58O4Si2	53336-13-3	277522	502.387
10.5096	2-naphthalenecarboxylic acid, 1,4-bis(acetyloxy)-, methyl ester	64.2282	C16H14O6	1000397-54-4	497178	302.079
27.0202	2-Palmitoylglycerol, 2TMS derivative	67.5019	C25H54O4Si2	53212-97-8	561157	474.356
6.04544	2-Pentanol, 3-methyl-, 2-acetate	57.5247	C8H16O2	34860-03-2	152460	144.115
23.5795	2-Phenyl-4,6-di(2-hydroxyphenyl)pyrimidine	52.6503	C22H16N2O2	52829-03-5	32950.6	340.121
14.617	2-Piperidinecarboxylic acid, methyl ester, PFP	55.9184	C10H12F5NO3	1000099-87-8	99449.7	289.074
7.85123	2-Propenal, 3-(2-pyridinylamino)-	52.4635	C8H8N2O	68970-82-1	19029.3	148.064
8.61859	2-Propenenitrile, 3-[di(cyanomethyl)amino]	50.7663	C7H6N4	1000197-63-8	60263.4	146.059
8.13017	2-Propenethioamide, 3-(acetyloxy)-N,N-dimethyl-, (Z)-	53.6263	C7H11NO2S	41783-61-3	8149.95	173.051
28.9738	2-propenoic acid, 3-[4-[bis(4-methylphenyl)amino]phenyl]-2-cyano-, ethyl ester	66.0674	C26H24N2O2	1000398-91-1	121243	396.184
10.1102	2-Tetrazene, 1,1,4,4-tetraethyl-	64.2157	C8H20N4	13304-29-5	55498.1	172.169
33.1282	2-Thiophenecarboxaldehyde, oxime	63.7466	C5H5NOS	29683-84-9	15377.3	127.009
10.0916	2-Trifluoromethylbenzoic acid, 2-chloroethyl ester	52.5329	C10H8ClF3O2	1000331-15-9	4.01456e+06	252.016
6.77937	3-(Perhydro-5-oxo-2-furyl)propionic acid	51.754	C7H10O4	6283-72-3	173865	158.058
14.8469	3,5-di-tert-Butyl-4-hydroxyphenylpropionic acid	76.7396	C17H26O3	20170-32-5	3.02689e+06	278.188
11.2987	3,6-Dinitro-9-isopropyl-carbazole	50.9222	C15H13N3O4	111199-66-7	34054.8	299.091
28.5798	3,6-phenanthrenediol, 2,7-dimethyl-4,5-di-2-pyridinyl-	60.1938	C26H20N2O2	1000398-86-6	79098.5	392.152
14.2635	3,7-dioxa-2,8-disilanonane, 2,2,8,8-tetramethyl-5,5-bis[[(trimethylsilyl)oxy]methyl]-	61.0041	C17H44O4Si4	1000402-79-1	340141	424.232
20.4857	3-.alpha.-Mannobiose, octakis(trimethylsilyl) ether (isomer 2)	64.853	C36H86O11Si8	1000380-09-6	68857.2	918.432
32.7021	3-[4-Chlorophenyl]-6,8-dimethyl-5-quinolinecarboxylic acid	51.5856	C18H14ClNO2	41191-71-3	36378.4	311.071
7.94243	3-Aminopropanol, 2TBDMS derivative	62.976	C15H37NOSi2	1000333-00-9	514177	303.241
14.7497	3-Butynoic acid	52.1201	C4H4O2	2345-51-9	48711	84.021
5.19186	3-Carboximidoyl-1-thiolane-1,1-dione	51.1461	C5H9NO2S	1000389-06-6	93468.5	147.035
10.6568	3-Chloro-8-methylthio-11H-indolo[3,2-c]quinoline	53.978	C16H11ClN2S	155249-85-7	149032	298.033
23.9353	3-Cyclohexyl-2-[cyclohexylimino]-2,3-dihydro-9-nitro-4H-1,3-oxazino[5,6-c]quinoline-4-one	50.2871	C23H26N4O4	40771-49-1	46901.4	422.195
8.17467	3H-1,2-Dithiol-3-one, 5-methyl-	50.5591	C4H4OS2	3620-08-04	8007.75	131.97
29.4752	3H-1,3,4-Benzotriazepin-2-amine, 7-chloro-N-ethyl-5-phenyl-	55.1371	C16H15ClN4	105448-15-5	72415.8	298.099
14.8587	3-Methyl-3H-naphth[1,2-e]indol-10-ol	57.5725	C17H13NO	98033-21-7	38668.5	247.1
10.2796	3-Methylaniline, N-butyl-N-ethyl-	50.2782	C13H21N	1000310-37-6	97512.4	191.167
8.45934	3-Methyl-l-valine	54.6234	C6H13NO2	20859-02-3	39424.6	131.095
6.28053	3-Pyridinol, TMS derivative	50.2991	C8H13NOSi	41571-88-4	1890.19	167.077
27.2037	3-Thiophenecarboxylic acid	50.0568	C5H4O2S	88-13-1	34051.1	127.993
6.34194	4-(4,5-Dihydro-1H-imidazol-2-yl)pyridine	55.5888	C8H9N3	21381-61-3	22839.2	147.08
11.2295	4-(4,5-Dimethyl-2-methylamino-phenylazo)benzoic acid	52.4998	C16H17N3O2	79333-14-5	132290	283.132
11.068	4,5-Diaza-2-oxatricyclo[7.4.0.0(4.8)]trideca-5,9,11,13-tetraene, 3-benzoyl-6-phenyl-	56.3621	C23H18N2O2	1000295-14-6	52049.9	354.137
26.3674	4,5-Dihydroxy-cyclohexane-1,2-dicarboxylic acid, bis-diisobutylamide	51.4868	C24H46N2O4	1000189-57-4	710.053	426.346
6.36581	4,6-Dihydroxypyrimidine, 5-aminocarbonyl-	50.3509	C5H5N3O3	1074-97-1	6403.65	155.033
11.2214	4,7-Dihydroxy-3-(4-methoxyphenyl)chromen-2-one	50.8395	C16H12O5	42345-56-2	37873.8	284.068
18.2262	4-Amino-3-ethyl-2-thioxo-2,3-dihydro-thiazole-5-carboxylic acid methylamide	52.9599	C7H11N3OS2	1000275-34-4	45551.2	217.034
26.0789	4-Aminomethylcyclohexane carboxylic acid, N,N-bis(trimethylsilyl)-, trimethylsilyl ester	60.0659	C17H39NO2Si3	1000386-64-2	78692.1	373.229
29.4903	4-Azaphenanthrene, 1-methyl-3-(2-phenylethenyl)-	57.4621	C22H17N	1000298-83-8	58128.7	295.136
35.9777	4-Ethynyl-1,2,7-trimethyl-trans-decahydroquinol-4-ol	51.0622	C14H23NO	42850-02-2	126485	221.178
25.9703	4H-Cyclopropa[5',6']benz[1',2':7,8]azuleno[5,6-b]oxiren-4-one, 8,8a-bis(acetyloxy)-2a-[(acetyloxy)methyl]-1,1a,1b,1c,2a,3,3a,6a,6b,7,8,8a-dodecahydro-6b-hydroxy-3a-methoxy-1,1,5,7-tetramethyl-, [1aR-(1a.alpha.,1b.beta.,1c.alpha.,2a.alpha.,3a.alpha.,6a.alpha.,6b.alpha.,7.alpha.,8.beta.,8a.alpha.)]-	51.9678	C27H36O10	64869-55-2	8092.69	520.231
26.2178	4-Methylthio-N-phenyl-1,2-carbazoledicarboximide	55.6104	C21H14N2O2S	22359-21-3	1.50596e+06	358.078
24.5942	4-O-Methyl-12b,13,20-triacetoxy-2,9-dihydroxy-3a-carboxy-2,3-seco-tigla-1(10),6-diene-3,9-lactone	54.2944	C27H36O10	1000203-00-9	28450.5	520.231
14.8156	4-Piperidinone, 1-methyl-	54.5792	C6H11NO	1445-73-4	2940.51	113.084
23.0329	4-Propylaniline, N,N-di(trifluoroacetyl)-	50.5661	C13H11F6NO2	1000328-32-9	523.097	327.069
19.1935	4-Pyridinol 2,6-bis[trifluoromethyl]	51.7181	C7H3F6NO	43150-55-6	30197.6	231.012
17.1486	4-Quinolinol, 2-phenyl-	52.1758	C15H11NO	1144-20-3	450.558	221.084
10.2404	4-Thiazolidinecarboxylic acid, 2-hexyl-	52.9038	C10H19NO2S	14347-74-1	4691.02	217.114
15.8464	5,5,7,7-Tetraethylundecane	55.7532	C19H40	1000360-42-0	228214	268.313
35.0679	5,7-Dihydroxy-3-[2,3-dihydro-4-hydroxy-2-(2-hydroxyisopropyl)benzofuran-7-yl]chromone	72.5223	C20H18O7	99347-41-8	219940	370.105
35.2596	5,7-Dihydroxy-3-[2,3-dihydro-4-hydroxy-2-(2-hydroxyisopropyl)benzofuran-7-yl]chromone	73.0325	C20H18O7	99347-41-8	134173	370.105
5.6256	5,8,11-Eicosatrienoic acid, (Z)-, TMS derivative	54.9816	C23H42O2Si	1000333-53-6	116319	378.295
19.2152	5-[Cyano-(4,5-dihydro-3H-pyrrol-2-yl)-methylene]pyrrolidine-2-carboxylic acid, methyl ester	63.3624	C12H15N3O2	1000188-19-7	619408	233.116
8.27568	5-Nitroindole, TMS derivative	51.7095	C11H14N2O2Si	74367-59-2	36038.6	234.082
34.7762	5-Propoxy-2,2'-bipyridyl	65.9499	C13H14N2O	58792-52-2	61553.4	214.111
10.8376	6H-[1,3]Dioxolo[5,6]benzofuro[3,2-c][1]benzopyran-2-ol, 6a,12a-dihydro-3-methoxy-, (6ar-cis)-	53.5491	C17H14O6	30461-92-8	87039.8	314.079
22.0674	6-Methoxy-1-methyl-2-phenyl-4(1H)-quinolinone (eduline)	58.1536	C17H15NO2	6878-08-06	123780	265.11
10.5392	6-Methyl-2,5-diphenyl-6,7-dihydropyrazolo[1,5-c]pyrimidin-7-one	52.4251	C19H15N3O	110950-94-2	34786.7	301.122
31.8055	7aH-Cyclopenta[a]cyclopropa[f]cycloundecene-2,4,7,7a,10,11-hexol, 1,1a,2,3,4,4a,5,6,7,10,11,11a-dodecahydro-1,1,3,6,9-pentamethyl-, 2,4,7,10,11-pentaacetate	57.2173	C30H44O11	51906-08-2	355897	580.288
35.5361	7H-Indeno[2,1-a]anthracen-7-one	52.7413	C21H12O	27582-45-2	37590.9	280.089
14.5728	7H-Purin-6-amine, 7-methyl-	53.2802	C6H7N5	935-69-3	147703	149.07
34.3417	8-Hydroxy-1-oxo-1H-benzo(c)pyran-4-carboxylic acid	54.8254	C10H6O5	15868-29-8	205522	206.022
6.55607	8-Pentadecanone	52.3639	C15H30O	818-23-5	79077.8	226.23
12.457	9,10-Ethanoanthracene-9(10H)-methylamine, N-methyl-, 9,10-dihydro	51.4414	C18H19N	17243-39-9	22783.9	249.152
23.5103	9,12-Octadecadienoic acid (Z,Z)-, TMS derivative	78.0474	C21H40O2Si	56259-07-5	126253	352.28
14.8932	9,9,10,10-Tetrafluoro-9,10-disila-9,10-dihydroanthracene	55.2822	C12H8F4Si2	32962-42-8	658.649	284.01
23.5768	9-Octadecenoic acid, (E)-, TMS derivative	73.0992	C21H42O2Si	96851-47-7	161254	354.295
19.7493	Acetamide, 2,2,2-trifluoro-N-(2-phenyl-2H-benzotriazol-5-yl)-	51.4412	C14H9F3N4O	350700-28-6	28435.6	306.073
15.4733	Acetamide, 2-[[4-methyl-5-(4-morpholinylmethyl)-4H-1,2,4-triazol-3-yl]thio]-	61.5359	C10H17N5O2S	1000316-38-6	235463	271.11
26.4461	Acetazolamide tri-methyl derivative	57.1217	C7H12N4O3S2	1000137-18-3	123118	264.035
8.01459	Acetyl bromide	54.8253	C2H3BrO	506-96-7	70568.6	121.937
10.4704	Alanine, N-methyl-n-butoxycarbonyl-, hexadecyl ester	65.0908	C25H49NO4	1000329-38-0	744465	427.366
11.9017	Azelaic acid, 2TBDMS derivative	66.4796	C21H44O4Si2	104255-97-2	21471.5	416.278
35.1649	Benzamide, 2,3,4-trifluoro-N-(2,4-dimethoxyphenyl)-	57.3236	C15H12F3NO3	1000339-09-3	224474	311.077
33.3388	Benzamide, 2-acetyl-N-[2-(2,3-dichlorophenoxy)ethyl]-	58.9432	C17H15Cl2NO3	298684-46-5	95861	351.043
8.99519	Benzamide, N-(4-methoxyphenyl)-3-methyl-	52.1042	C15H15NO2	1000307-11-5	13989.8	241.11
19.7949	Benzenaminium, 4-carboxy-N,N,N-trimethyl-, hydroxide, inner salt	57.5544	C10H13NO2	33046-28-5	20246.9	179.095
26.4372	benzene, 1,1'-methylenebis[3-(1,1-dimethylethyl)-5-methyl-4-[(trimethylsilyl)oxy]-	64.8589	C29H48O2Si2	1000399-56-2	1.3399e+06	484.319
24.2897	Benzene, 1,3-diiodo-	58.1317	C6H4I2	626-00-6	18872.2	329.84
20.2786	benzenesulfonamide, 2-chloro-N-ethyl-N-(2-hydroxyethyl)-5-nitro-	51.0819	C10H13ClN2O5S	1000402-23-1	42080.6	308.023
35.2905	benzenesulfonyl fluoride, 2-[2-(3,6-diamino-5-hydroxy-2-pyridinyl)diazenyl]-	58.9799	C11H10FN5O3S	1000397-69-9	190608	311.049
20.8519	Benzo(b)carbazole	55.6562	C16H11N	243-28-7	809.946	217.089
12.7712	Benzoic acid, 4-[(2,4-dimethoxy-6-pentylbenzoyl)oxy]-2-methoxy-6-pentyl-, methyl ester	62.2595	C28H38O7	5366-08-05	11587.4	486.262
33.8208	benzothiazole, 6-isothiocyanato-2-methyl-	50.363	C9H6N2S2	1000400-52-4	3777.2	205.997
11.0239	Boron, bis[.mu.-(3,5-dimethyl-1H-pyrazolato-N1:N2)]tetraethyldi-	57.2601	C18H34B2N4	14695-73-9	36552.9	328.297
35.4394	Bromoacetamide, N,N-dinonyl-	51.8051	C20H40BrNO	1000308-17-4	76263.2	389.229
16.5959	Butanal, 2,3,4-tris[(trimethylsilyl)oxy]-3-[[(trimethylsilyl)oxy]methyl]-, O-methyloxime, (S)-	50.8473	C18H45NO5Si4	56196-22-6	30261.5	467.237
19.1036	Butanal, 2,3,4-tris[(trimethylsilyl)oxy]-3-[[(trimethylsilyl)oxy]methyl]-, O-methyloxime, (S)-	51.9993	C18H45NO5Si4	56196-22-6	362192	467.237
5.957	Butanethioic acid, 3-methyl-, S-ethyl ester	67.8693	C7H14OS	2432-57-7	217431	146.077
22.232	Carbamic acid, (2-methoxyphenyl)-, 4-pyridinylmethyl ester	54.6723	C14H14N2O3	1000319-47-1	51543.2	258.1
5.83972	Carbomethoxymethanesulfinic acid, methyl ester	53.7911	C4H8O4S	1000306-27-3	17334.1	152.014
23.9101	Cephalotaxine, 11-(acetyloxy)-, acetate (ester), (11.alpha.)-	55.8956	C22H25NO7	49686-56-8	54076.4	415.163
32.3765	Cholesterol, TMS derivative	70.8961	C30H54OSi	1856-05-9	856538	458.394
18.7374	Citric acid, 4TMS derivative	73.277	C18H40O7Si4	14330-97-3	485383	480.185
9.30399	Cyanoacetylurea	51.6792	C4H5N3O2	1448-98-2	43613.3	127.038
16.1663	Cyclooctasiloxane, hexadecamethyl-	56.4412	C16H48O8Si8	556-68-3	1220.8	592.15
33.8058	Cyclopropa[3',4']benz[1',2':4,5]azuleno[1,8a-d]-1,3-dioxole-5b,7,7a-triol, 3a,5a,6,7,8,8a,8b,11-octahydro-10-(hydroxymethyl)-2,2,4,6,8,8-hexamethyl-, 7,7a-diacetate, [3aS-(3a.alpha.,5a.alpha.,5b.alpha.,6.alpha.,7.beta.,7a.alpha.,8a.alpha.,8b.beta.,11aS*)]-	50.0563	C27H38O8	77573-38-7	295090	490.257
35.1766	Cyclopropanecarboxylic acid, 3-ethylphenyl ester	56.8276	C12H14O2	1000354-66-1	114361	190.099
24.0891	Cymarin	51.8108	C30H44O9	508-77-0	405840	548.299
6.6727	D-(-)-Lactic acid, 2TMS derivative	90.7096	C9H22O3Si2	1000333-99-1	2.44347e+07	234.111
19.3852	D-(-)-Ribose, tetrakis(trimethylsilyl) ether, trimethylsilyloxime (isomer 1)	59.0423	C20H51NO5Si5	1000380-39-2	91959.5	525.261
19.956	D-(+)-Talose, pentakis(trimethylsilyl) ether, methyloxime (anti)	83.1859	C22H55NO6Si5	1000380-18-8	1.99575e+07	569.288
19.5732	D-(+)-Talose, pentakis(trimethylsilyl) ether, methyloxime (syn)	84.5588	C22H55NO6Si5	1000380-18-7	1.19168e+06	569.288
19.7159	D-(+)-Talose, pentakis(trimethylsilyl) ether, methyloxime (syn)	84.1154	C22H55NO6Si5	1000380-18-7	4.68176e+07	569.288
19.7402	D-(+)-Talose, pentakis(trimethylsilyl) ether, methyloxime (syn)	59.6418	C22H55NO6Si5	1000380-18-7	1.3316e+07	569.288
19.5112	D-(+)-Xylose, tetrakis(trimethylsilyl) ether, ethyloxime (isomer 2)	55.6611	C19H47NO5Si4	1000394-65-0	57094.6	481.253
13.8842	D-Alanine, N-(2-fluoro-5-trifluoromethylbenzoyl)-, nonadecyl ester	50.2228	C30H47F4NO3	1000348-35-8	22079.8	545.349
16.8043	D-Arabinose, tetrakis(trimethylsilyl) ether, ethyloxime (isomer 2)	78.837	C19H47NO5Si4	1000394-64-9	331133	481.253
5.72462	Decane	72.1544	C10H22	124-18-5	1894.02	142.172
20.016	Decane, 3-ethyl-3-methyl-	57.888	C13H28	17312-66-2	275441	184.219
6.10464	Decane, 4-methyl-	75.2958	C11H24	2847-72-5	941373	156.188
14.6154	dl-4-Isopropyl-3-(1-carboxyethyl)-.delta.(4)-thiazoline-2-thione	55.2389	C9H13NO2S2	75624-93-0	36533.1	231.039
6.74073	dl-7-Azatryptophan	50.9022	C10H11N3O2	1137-00-4	190969	205.085
32.2634	DL-Valine, N-methyl-N-(3-chloropropoxycarbonyl)-, 3-chloropropyl ester	54.2652	C13H23Cl2NO4	1000392-98-9	49397.8	327.1
25.5474	D-Myo-Inositol, 1,2,4,5,6-pentakis-O-(trimethylsilyl)-, bis(trimethylsilyl) phosphate	64.3917	C27H69O9PSi7	55568-91-7	194647	764.306
9.31237	Dodecane	84.435	C12H26	112-40-3	466853	170.203
7.59231	Dodecane	69.4279	C12H26	112-40-3	34635.7	170.203
7.60537	Dodecane	56.2045	C12H26	112-40-3	29983	170.203
18.6151	Dodecane, 2-methyl-	67.2571	C13H28	1560-97-0	215205	184.219
9.68079	Dodecane, 4-methyl-	71.5255	C13H28	6117-97-1	132796	184.219
19.2979	D-Pinitol, pentakis(trimethylsilyl) ether	61.1624	C22H54O6Si5	1000380-13-4	120589	554.277
16.8074	D-Ribofuranose, 5-deoxy-5-(methylsulfinyl)-1,2,3-tris-O-(trimethylsilyl)-	54.9461	C15H36O5SSi3	56700-80-2	81855.8	412.159
17.2357	Eicosane	82.0522	C20H42	112-95-8	168976	282.329
13.6158	Eicosane, 1-iodo-	50.7234	C20H41I	1000406-31-8	1351.82	408.225
20.0723	Epi-epoxy-buphanamine	52.1713	C17H19NO5	6835-78-5	133546	317.126
28.6165	Estra-1,3,5(10)-trien-6-one, 3,17-bis(acetyloxy)-2-methoxy-, (17.beta.)-	55.9318	C23H28O6	69540-62-1	242468	400.189
21.61	Estradiol, diacetate	59.9117	C22H28O4	3434-88-6	50950.7	356.199
10.7364	Ethanone, 1-(4-bromophenyl)-2-[5-(4-bromophenyl)-4,5-dihydro-3-phenyl-5-isoxazolyl]-	58.6382	C23H17Br2NO2	56804-90-1	25420.7	496.963
6.25544	Ethanone, 1,1',1''-(1,3,5-benzenetriyl)tris-	54.0945	C12H12O3	779-90-8	23497.3	204.079
5.15361	Ethyl iso-allocholate	55.6358	C26H44O5	1000043-05-3	319692	436.319
32.6064	Ethylamine, N,N-didecyl-2-(2-thiophenyl)-	55.0874	C26H49NS	1000310-35-0	22230.4	407.359
5.37651	Ethylene glycol, 2TMS derivative	81.4503	C8H22O2Si2	7381-30-8	602817	206.116
7.45388	Fluoxetine, N-acetyl	53.7995	C19H20F3NO2	202122-33-6	141122	351.145
16.2058	Formamide. N-(5-amino-2H-1,2,3-triazol-4-yl)-	53.7275	C3H5N5O	328977-78-2	785.513	127.049
19.923	Furo[2,3-H]coumarine, 1,2-dihydro-6-methyl-1-oxo-2-phenylhydrazono-	61.0761	C18H12N2O4	324527-13-1	33135.9	320.08
21.3438	Galactinol, nonakis(trimethylsilyl) ether	62.1977	C39H94O11Si9	1000380-09-4	944189	990.472
10.4934	Glutaric acid, 3-chlorophenyl 4-cyanophenyl ester	50.6491	C18H14ClNO4	1000393-27-8	60776	343.061
29.1097	Glycerol monostearate, 2TMS derivative	86.3184	C27H58O4Si2	1188-75-6	1.07743e+06	502.387
10.5064	Glycerol, 3TMS derivative	85.7055	C12H32O3Si3	6787-10-06	3.6112e+06	308.166
32.473	Glycine, 2-cyclohexyl-N-(but-3-yn-1-yl)oxycarbonyl-, dodecyl ester	55.2049	C25H43NO4	1000383-19-3	7857.36	421.319
11.0571	Glycine, 3TMS derivative	89.3975	C11H29NO2Si3	5630-82-0	2.35138e+06	291.151
22.8143	Glycine, N-ethyl-N-allyloxycarbonyl-, decyl ester	51.1379	C18H33NO4	1000323-35-2	529.962	327.241
30.7747	Glycine, N-pentadecafluorooctanoyl-, pentyl ester	52.8091	C15H14F15NO3	1000330-08-7	16282.1	541.073
6.97996	Glycolic acid, 2TMS derivative	66.6551	C8H20O3Si2	33581-77-0	147512	220.095
14.1148	Heneicosane	80.83	C21H44	629-94-7	361240	296.344
34.7015	Heptabarbital	63.3746	C13H18N2O3	509-86-4	261091	250.132
22.7804	Heptadecanoic acid, TMS derivative	81.7816	C20H42O2Si	55517-58-3	5.91407e+06	342.295
25.6903	Heptasiloxane, hexadecamethyl-	56.1069	C16H48O6Si7	541-01-5	195208	532.184
29.4908	Heptasiloxane, hexadecamethyl-	51.5425	C16H48O6Si7	541-01-5	232637	532.184
28.3063	Heptasiloxane, hexadecamethyl-	52.1751	C16H48O6Si7	541-01-5	256671	532.184
10.6118	Hexadecane	74.6848	C16H34	544-76-3	353391	226.266
15.8275	Hexadecane	66.763	C16H34	544-76-3	2078	226.266
20.2154	Hexadecanoic acid, methyl ester	65.2806	C17H34O2	112-39-0	159648	270.256
10.5556	Indoline, 2,3-diethyl-3-methyl-	52.5691	C13H19N	18781-60-7	26007.3	189.152
23.4521	Iron, tricarbonyl[N-(phenyl-2-pyridinylmethylene)benzenamine-N,N']-	54.6272	C21H14FeN2O3	74764-11-7	13037.5	398.035
32.4074	Ketone, 11-bromotricyclo[8.2.2.2(4,7)]hexadeca-4,6,10,12,13,15-hexaen-5-yl methyl	53.1825	C18H17BrO	18931-44-7	60238.6	328.046
14.5623	L-5-Oxoproline, , 2TMS derivative	85.4599	C11H23NO3Si2	30274-77-2	2.81555e+06	273.122
7.45806	L-Alanine, 2TMS derivative	85.2384	C9H23NO2Si2	27844-07-1	1.18989e+06	233.127
13.7394	L-Aspartic acid, 3TMS derivative	64.5303	C13H31NO4Si3	55268-53-6	583267	349.156
12.3564	Lead, [29H,31H-phthalocyaninato(2-)-N29,N30,N31,N32]-, (SP-4-1)-	50.7696	C32H16N8Pb	15187-16-3	1064.69	720.126
10.8439	L-Isoleucine, 2TMS derivative	67.7887	C12H29NO2Si2	7483-92-3	391098	275.174
20.0797	L-Lysine, 4TMS derivative	57.6606	C18H46N2O2Si4	55429-07-7	374305	434.264
29.619	L-Lysine, N6-acetyl-N2-[N-[N-[N-(N2-acetyl-N,N,N2-trimethyl-L-asparaginyl)-N-methyl-L-phenylalanyl]-N-methyl-L-phenylalanyl]-N,1-dimethyl-L-tryptophyl]-N2,N6-dimethyl-, methyl ester	52.3178	C53H72N8O9	56818-04-3	94431.7	964.542
23.301	l-Norvaline, N-(2-methoxyethoxycarbonyl)-, undecyl ester	50.1935	C20H39NO5	1000328-64-3	66398.2	373.283
15.1092	L-Threonic acid, tris(trimethylsilyl) ether, trimethylsilyl ester	70.195	C16H40O5Si4	1000352-53-3	41547	424.195
12.3915	L-Threonine, 3TMS derivative	83.1835	C13H33NO3Si3	7537-02-02	406187	335.177
7.73328	Methoxy-bis(2-methoxycarbonyl-ethyl)-amine	50.2306	C9H17NO5	78191-04-5	78116.8	219.111
14.111	Methyl 2,2-dichloro-3-oxopentanoate	50.5658	C6H8Cl2O3	1000112-40-9	228467	197.985
32.542	Methyl 2-[2-(4-chlorophenyl)-5-methyl-1H-imidazol-1-yl]dithiobenzoate	51.2813	C18H15ClN2S2	105251-31-8	86059.2	358.037
12.1526	Methyl n-hexyl ketone-1-phenyl-1,2-ethanediol ketal 2	51.8269	C16H24O2	1000285-39-8	135124	248.178
31.2952	Methyl pentyl methylphosphonate	56.8532	C7H17O3P	170082-80-1	38831.2	180.092
25.568	Morphinan-14-ol, 6-azido-4,5-epoxy-3-methoxy-17-methyl-, (5.alpha.,6.beta.)-	50.2467	C18H22N4O3	38211-26-6	504440	342.169
21.8106	Morphinan-3-ol, 6-azido-4,5-epoxy-17-methyl-, (5.alpha.,6.beta.)-	50.6021	C17H20N4O2	22952-87-0	460.97	312.159
22.4124	Morphinan-6-one, 7,8-didehydro-3,7-dimethoxy-17-methyl-, L-(+)-	51.5813	C19H23NO3	14910-53-3	2646.45	313.168
22.0593	Myo-Inositol, 6TMS derivative	77.751	C24H60O6Si6	2582-79-8	929118	612.301
12.713	N-(2-Methyl-5-trimethylsilylphenyl)acetamide	53.5017	C12H19NOSi	30127-86-7	2148.72	221.124
19.9794	N-(3-Amino-3a,6a-dicyano-1,1-ethylenedioxy-6-methyl-1,3a,4,5,6,6a-hexahydrocyclopenta[c]pyrrol-4-yl)-N',N'-dimethylacetohydrazide	50.3098	C16H22N6O3	1000326-95-7	14849.6	346.175
18.2134	N-(6-Quinolinyl)phthalimide	63.4141	C17H10N2O2	59679-81-1	130142	274.074
6.03023	N,N'-di-t-Butylethylenediamine	64.1284	C10H24N2	4062-60-6	189511	172.194
26.508	N-[2-(3-Chloro-phenylamino)-2-phenyl-ethyl]-4-methyl-benzenesulfonamide	65.3204	C21H21ClN2O2S	1000274-90-5	429330	400.101
9.49448	N-Acetyl-N-desmethylmethoxyphenamine	59.8629	C12H17NO2	72687-66-2	474824	207.126
24.8281	N-Acetylpyrrolidone	53.7288	C6H9NO2	932-17-2	117756	127.063
8.61784	N-Benzyl-N-ethyl-p-isopropylbenzamide	72.7848	C19H23NO	15089-22-2	191648	281.178
6.11	N-Cyanomethyl-N-methylacetamide	61.2959	C5H8N2O	28741-21-1	295730	112.064
33.4013	N-Ethyl-2-amino-octadecan-1,3-diol benzeneboronate	61.3329	C26H46BNO2	1000149-10-0	40978.8	415.362
27.4947	Nonadecanoic acid, TBDMS derivative	53.9475	C25H52O2Si	104255-82-5	84230.9	412.374
5.12398	Nonane, 2,2,4,4,6,8,8-heptamethyl-	52.9126	C16H34	4390-04-09	279264	226.266
13.7033	Nonane, 2,5-dimethyl-	52.2508	C11H24	17302-27-1	2665.38	156.188
6.68506	Nonane, 4,5-dimethyl-	85.3477	C11H24	17302-23-7	1.5351e+06	156.188
6.78847	Nonane, 4,5-dimethyl-	75.574	C11H24	17302-23-7	568297	156.188
10.0299	Nonane, 5-methyl-5-propyl-	53.0801	C13H28	17312-75-3	645.504	184.219
14.8174	Nonanoic acid, [tetrahydro-2-furanyl]ethyl ester	52.2555	C14H26O3	1000132-19-0	139720	242.188
17.8346	Octadecane, 3-methyl-	54.6343	C19H40	6561-44-0	11739.9	268.313
22.6064	Octadecanoic acid, 17-methyl-, methyl ester	57.5504	C20H40O2	55124-97-5	87217.4	312.303
8.83052	Octadecanoic acid, 4-hydroxy-, methyl ester	50.1503	C19H38O3	2420-38-4	124105	314.282
7.50301	Octane, 5-ethyl-2-methyl-	83.7128	C11H24	62016-18-6	189796	156.188
23.6415	Oleic Acid, (Z)-, TMS derivative	63.2163	C21H42O2Si	21556-26-3	35892	354.295
9.53298	Oxalic acid, 2-ethylhexyl tetradecyl ester	64.347	C24H46O4	1000309-39-7	193641	398.34
14.559	p-(p-Hydroxyphenoxy)benzoic acid	59.567	C13H10O4	500-76-5	191386	230.058
21.636	Palmitic Acid, TMS derivative	86.1311	C19H40O2Si	55520-89-3	1.9827e+07	328.28
6.74157	para-Morpholinoacetophenone	50.1948	C12H15NO2	39910-98-0	39752	205.11
10.6913	p-Benzoquinone, 2,5-dibromo-3,6-dihydroxy-	55.7922	C6H2Br2O4	4370-59-6	86240.8	295.832
12.9179	Pentanethioic acid, S-ethyl ester	52.3475	C7H14OS	2432-92-0	295269	146.077
8.90259	Phenarsazine, 5,10-dihydro-10-hydroxy-, 10-oxide	54.4825	C12H10AsNO2	4733-19-1	36611.5	274.993
32.311	Phenol, 2-methoxy-5-[(1,2,3,4-tetrahydro-6,7-dimethoxy-2-methyl-1-isoquinolinyl)methyl]-, (S)-	51.4592	C20H25NO4	3122-95-0	64071.2	343.178
6.61562	Phenol, TMS derivative	50.2554	C9H14OSi	1529-17-5	98591.3	166.081
17.4703	Phosphoric acid, 2-(trimethylsiloxy)-1-[(trimethylsiloxy)methyl]ethyl bis(trimethylsilyl) ester	58.6438	C15H41O6PSi4	31038-12-7	56441.6	460.172
17.9796	Phosphoric acid, bis(trimethylsilyl) 2,3-bis[(trimethylsilyl)oxy]propyl ester	72.8043	C15H41O6PSi4	31038-11-6	74687.4	460.172
14.5992	Phthalazino[2,3-b]phthalazine-5,12(7H,14H)-dione, 3-chloro-	51.5092	C16H11ClN2O2	37149-77-2	485.97	298.051
15.7488	piperazine, 1,4-bis(2-ethylhexyl)-	60.1833	C20H42N2	1000397-69-2	212734	310.335
7.96417	Piperazine-2,5-dione, 4-(4-methylbenzoyl)-	55.5748	C12H12N2O3	259228-04-1	80846.4	232.085
12.9668	Propane, 1-isocyanato-2-methyl-	57.6521	C5H9NO	1873-29-6	57607.6	99.068
18.8111	Propenoic acid, 2-cyano-3-(1-methyl-5-phenylthio-2-pyrrolyl)-, methyl ester	50.6668	C16H14N2O2S	94008-41-0	30690.7	298.078
22.7042	Propenoic acid, 2-cyano-3-(1-methyl-5-phenylthio-2-pyrrolyl)-, methyl ester	50.9839	C16H14N2O2S	94008-41-0	1716.23	298.078
20.6073	Propenoic acid, 2-cyano-3-(1-methyl-5-phenylthio-2-pyrrolyl)-, methyl ester	54.1771	C16H14N2O2S	94008-41-0	56758.5	298.078
18.4136	Propenoic acid, 2-cyano-3-(1-methyl-5-phenylthio-2-pyrrolyl)-, methyl ester	54.6265	C16H14N2O2S	94008-41-0	2480.23	298.078
21.4002	pyrazino[2,3-b:5,6-b']diquinoxaline	53.0809	C16H8N6	1000400-04-5	262464	284.081
21.6022	Pyrrolo[3,2-g]quinoline-5-carboxylic acid, 9-methoxy-2,3,7-trimethyl-, ethyl ester	60.3977	C18H20N2O3	199918-73-5	10984.4	312.147
10.6442	Quinoxaline, 2,3-diphenyl-	52.4957	C20H14N2	1684-14-6	4221.06	282.116
19.2899	Sarcosine, N-(4-ethylbenzoyl)-, hexyl ester	55.7383	C18H27NO3	1000321-23-3	25463.5	305.199
23.9943	Sarcosylsarcosine, N-ethoxycarbonyl-, octyl ester	52.9311	C17H32N2O5	1000320-69-4	22359.4	344.231
20.437	Scyllo-Inositol, 6TMS derivative	53.9402	C24H60O6Si6	14251-18-4	33460.4	612.301
11.975	Serine, 3TMS derivative	76.0802	C12H31NO3Si3	64625-17-8	433917	321.161
22.8932	Silane, [[(3.beta.,5.alpha.,20S)-pregnane-3,20-diyl]bis(oxy)]bis[triethyl-	52.9226	C33H64O2Si2	65598-86-9	124992	548.444
8.14339	Silane, 1,8-octanediylbis[trimethyl-	66.9997	C14H34Si2	65118-88-9	9.68109e+06	258.22
8.53621	Silane, cyclohexyldimethoxymethyl-	86.8668	C9H20O2Si	17865-32-6	888894	188.123
33.3678	Silane, diethyl(2-ethoxyethyloxy)octadecyloxy-	50.4886	C26H56O3Si	1000363-52-8	74087.4	444.4
26.2371	Silane, diethyl(2-methoxyethoxy)pentadecyloxy-	51.4833	C22H48O3Si	1000363-54-4	69385.8	388.337
25.439	Silane, diethyldecyloxyoctyloxy-	51.3413	C22H48O2Si	1000363-08-0	58788.5	372.342
13.9413	Silane, diethylheptadecyloxy(2-phenylethoxy)-	59.462	C29H54O2Si	1000363-17-2	45806.3	462.389
27.3683	Silane, diethylhexadecyloxy(2-methoxyethoxy)-	54.0421	C23H50O3Si	1000363-54-5	39552.2	402.353
34.0234	Silane, dimethyl(4-phenylphenoxy)dodecyloxy-	52.1663	C26H40O2Si	1000347-49-4	39314.6	412.28
26.44	Silane, dimethyl(4-phenylphenoxy)heptadecyloxy-	54.1824	C31H50O2Si	1000347-49-8	13546	482.358
19.7527	Silane, methyltriphenoxy-	58.8706	C19H18O3Si	3439-97-2	15398.9	322.103
10.4616	Silanol, trimethyl-, phosphate (3:1)	75.6152	C9H27O4PSi3	10497-05-9	2.13985e+06	314.095
17.9753	Spiro[2-cyclohexene-1,7'(1'H)-cyclopent[ij]isoquinolin]-4-one, 2',3',8',8'a-tetrahydro-5'-hydroxy-6'-methoxy-1'-methyl-, (1S-trans)-	51.0494	C18H21NO3	10214-55-8	155084	299.152
35.4811	Spiro[5H-dibenzo[a,d]cycloheptene-5,1'-[1H]isoindole], 2',3',10,11-tetrahydro-2'-methyl-	57.4414	C23H21N	35926-76-2	85302.8	311.167
23.8702	Stearic acid, TMS derivative	91.3417	C21H44O2Si	18748-91-9	10697921	356.311
26.195	Succinic acid, 2,2,3,3,4,4,5,5-octafluoropentyl 2-methylpent-3-yl ester	52.0137	C15H20F8O4	1000389-59-5	53111.6	416.123
8.67169	Sulfurous acid, 2-ethylhexyl hexyl ester	57.202	C14H30O3S	1000309-20-2	1604.99	278.192
10.101	Sydnone, 3-(dimethylamino)-4-[(hydroxyimino)methyl]-	58.4713	C5H8N4O3	69978-11-6	177207	172.06
31.722	Terephthalic acid, 2TMS derivative	50.5294	C14H22O4Si2	4147-84-6	263423	310.106
34.921	Terephthalic acid, monoamide, N-ethyl-N-phenyl-, propyl ester	50.2927	C19H21NO3	1000323-93-8	168300	311.152
30.8462	tert-Butyldimethylsilyl 3-methyl-4-((2,2,3,3,3-pentafluoropropanoyl)oxy)benzoate	56.8867	C17H21F5O4Si	1000385-89-9	148517	412.113
23.4084	Tetracosamethyl-cyclododecasiloxane	52.0104	C24H72O12Si12	18919-94-3	35075.5	888.226
28.6883	Tetracosamethyl-cyclododecasiloxane	60.8758	C24H72O12Si12	18919-94-3	161610	888.226
29.8	Tetracosamethyl-cyclododecasiloxane	60.434	C24H72O12Si12	18919-94-3	243999	888.226
30.8656	Tetracosamethyl-cyclododecasiloxane	57.9523	C24H72O12Si12	18919-94-3	359405	888.226
24.8551	Tetracosamethyl-cyclododecasiloxane	53.0849	C24H72O12Si12	18919-94-3	10317.4	888.226
27.4846	Tetracosamethyl-cyclododecasiloxane	57.3055	C24H72O12Si12	18919-94-3	246243	888.226
22.5234	Tetracosane	60.0579	C24H50	646-31-1	2205.11	338.391
15.9412	Tetracosane	50.1605	C24H50	646-31-1	21569.3	338.391
16.2084	Tetracosane	58.861	C24H50	646-31-1	2762.64	338.391
12.7415	Tetradecane	79.4169	C14H30	629-59-4	1686.11	198.235
11.4157	Tetradecane, 2,6,10-trimethyl-	64.3908	C17H36	14905-56-7	95088.5	240.282
6.24257	Tetrasiloxane, decamethyl-	65.5123	C10H30O3Si4	141-62-8	464640	310.127
26.224	Thianthrene, octafluoro-	62.3	C12F8S2	16012-83-2	7826.63	359.931
22.4592	Thieno[3,2-e]benzofuran	60.9041	C10H6OS	438-27-7	91436.6	174.014
34.0431	Trimethylindium	52.8164	C3H9In	3385-78-2	191940	159.974
6.6976	Tris(trimethylsilyl)amine	61.9991	C9H27NSi3	1586-73-8	8019.98	233.145
11.3445	Trisiloxane, octamethyl-	77.8499	C8H24O2Si3	107-51-7	1.39606e+06	236.108
12.7721	Tromethamine, 3TMS derivative	78.3964	C13H35NO3Si3	1000366-66-0	186129	337.192
10.0893	Urea, 2TMS derivative	88.6217	C7H20N2OSi2	18297-63-7	39669294	204.111
6.0046	urea, N-(2-mercaptoethyl)-N'-phenyl-	51.2919	C9H12N2OS	1000400-33-4	22969.3	196.067
5.29781	Vinyltriethylsilane	67.9865	C8H18Si	1112-54-5	50131.8	142.118
8.47513	Xanthene, 9,9-dimethyl-	65.2653	C15H14O	19814-75-6	65188.3	210.104

## Sheet: Supplementary table 8
Retention Time (RT)	Metabolites	% similarity	Molecular Formula	CAS Number	Peak Area	Molecular Weight (MW)
24.2791	(2,5-Dimethyl-1-p-tolyl-3-ylmethylene)-(4-acetylphenyl)amine	54.362	C22H22N2O	1000306-74-4	196564	330.173
7.72348	(2S,3R)-3-[(4E,7E)-Nona-4,7-dienoyl]-N,N-bis(trimethylsilyl)oxirane-2-carboxamide	58.7494	C18H33NO3Si2	1000395-61-1	3.12637e+06	367.2
33.9557	(3-Methoxy-phenyl)-(6-methyl-4-phenyl-quinazolin-2-yl)-amine	60.0057	C22H19N3O	1000317-62-7	104788	341.153
10.3557	(E)-2,4'-Bis(methoxymethoxy)-stilbene	51.3452	C18H20O4	115032-47-8	81329.8	300.136
32.5361	(S)-(-)-1-Amino-2-(methoxymethyl)-pyrrolidine	60.0326	C6H14N2O	59983-39-0	161082	130.111
13.0837	.beta.-Alanine, 3TMS derivative	69.6777	C12H31NO2Si3	55255-77-1	154656	305.166
5.67008	.beta.-Alanine, N-isobutyryl-, pentyl ester	53.0662	C12H23NO3	1000321-66-3	54886.8	229.168
29.5702	.beta.-D-Lactose, (isomer 1), 8TMS derivative	54.555	C36H86O11Si8	1000380-08-7	610184	918.432
34.5664	.beta.-Sitosterol, TMS derivative	57.5532	C32H58OSi	2625-46-9	96875.9	486.426
10.5126	[1,1'-Biphenyl]-4-carbonitrile, 4'-propyl-	58.1973	C16H15N	58743-76-3	159057	221.12
14.5036	[1,1'-Biphenyl]-4-carboxylic acid, 4'-methoxy-2'-[(methylamino)carbonyl]-	54.3981	C16H15NO4	53366-26-0	3727.91	285.1
20.5923	[1,2,4]Oxadiazole, 5-(4-tert-butylphenoxymethyl)-3-(thiophen-2-yl)-	55.6197	C17H18N2O2S	1000304-93-9	74090.8	314.109
15.1912	1-(1,2-Benzisoxazol-3-yl)-N-(trimethylsilyl)methanesulfonamide	50.1154	C11H16N2O3SSi	1000408-20-1	87712.6	284.065
31.7381	1-(3-Hydroxy-4-methylphenyl)-1,3,3,6-tetramethylindan-5-ol	52.8856	C20H24O2	107535-11-5	111916	296.178
16.7176	1,1'-Biphenyl, 5-hydroxy-3,2',3',4'-tetramethoxy-	51.0492	C16H18O5	119101-28-9	87971.1	290.115
8.01473	1,2,3-Trimethyldiaziridine	51.0691	C4H10N2	113604-56-1	947.871	86.084
7.74198	1,2,5-Triamino-1H-pyrrole-3,4-dicarbonitrile	53.1921	C6H6N6	75610-90-1	41404.3	162.065
7.71714	1,2,5-Triamino-1H-pyrrole-3,4-dicarbonitrile	52.7941	C6H6N6	75610-90-1	226063	162.065
14.8648	1,2-Benzenediol, o-di(2-bromopropionyl)-	50.1293	C12H12Br2O4	1000325-96-5	7452.89	377.91
9.68042	1,2-Cyclohexanediol, trans-	54.2292	C6H12O2	1460-57-7	203800	116.084
12.1878	1,2-Dihydro-3,6-diphenyl-S-tetrazine	56.4149	C14H12N4	14478-73-0	524.624	236.106
34.7155	1,3,5,7,9,11-Hexaethylbicyclo[5.5.1]hexasiloxane	50.5477	C12H34O7Si6	73113-17-4	193776	458.092
18.2854	1,3,5-Triazine, 2-(2-trifluoromethylphenylamino)-4,6-bis(3,5-dimethylpyrazol-1-yl)-	54.9949	C20H19F3N8	296773-71-2	10142.7	428.168
16.4358	1,3-Bis(2,4-dinitrophenylcarbamoyl)benzene	50.7649	C20H12N6O10	349127-08-8	10191	496.061
10.3756	1,3-Oxazolidine, 4-methyl-trans-5-phenyl-2-[4-(dimethylamino)phenyl]-	52.325	C18H22N2O	1000138-83-2	596561	282.173
19.5488	1,4-benzenediamine, N1,N1-bis(4-methylphenyl)-	56.1853	C20H20N2	1000402-01-0	33843.3	288.163
19.2195	10H-Phenothiaphosphine, 7-chloro-2-fluoro-10-methoxy-, 10-oxide	50.1714	C13H9ClFO2PS	55125-05-8	14143.5	313.973
18.9132	11-Hydroxy-.DELTA.9-tetrahydrocannabinol	57.1131	C21H30O3	36557-05-8	37042.6	330.219
8.10512	12H-benzo[b]phenoxazine, 12-methyl-	65.0253	C17H13NO	1000401-31-6	56246.5	247.1
7.84239	16,17-Dimethoxy-homoerythrinane	50.5377	C19H27NO2	1000148-31-0	13968.6	301.204
23.5532	17.alpha.-Estradiol diacetate	51.1058	C22H28O4	1474-52-8	6.54115e+06	356.199
20.749	1-Aminocyclopentanecarboxylic acid, 3-chloropropoxycarbonyl-, undecyl ester	53.081	C21H38ClNO4	1000392-62-8	31455.6	403.249
10.2542	1-Cyano-4-diphenyl(tert-butyl)silyloxybenzene	54.8882	C23H23NOSi	1000307-86-7	39795.3	357.155
17.0576	1-Cyano-4-diphenyl(tert-butyl)silyloxybenzene	51.7715	C23H23NOSi	1000307-86-7	36144.3	357.155
11.2894	1-Cyano-4-diphenyl(tert-butyl)silyloxybenzene	64.4918	C23H23NOSi	1000307-86-7	861.083	357.155
14.7785	1-Cyano-4-diphenyl(tert-butyl)silyloxybenzene	54.3688	C23H23NOSi	1000307-86-7	2404.18	357.155
19.8646	1-Cyano-4-diphenyl(tert-butyl)silyloxybenzene	54.8923	C23H23NOSi	1000307-86-7	72653.8	357.155
12.0241	1-Cyano-4-diphenyl(tert-butyl)silyloxybenzene	60.3282	C23H23NOSi	1000307-86-7	364688	357.155
11.7889	1-Cyano-4-diphenyl(tert-butyl)silyloxybenzene	61.7669	C23H23NOSi	1000307-86-7	133083	357.155
22.9064	1-Cyclohexyldimethylsilyloxyoctadecane	62.1337	C26H54OSi	1000281-96-8	55439.8	410.394
34.9751	1-Ethyl-1-(3-pentadecyloxy)-1-silacyclopentane	50.0612	C21H44OSi	1000282-47-7	96529.6	340.316
10.672	1H-1,2,4-Triazol-5-amine, 3-(4-methoxyphenyl)-	56.8233	C9H10N4O	1000337-36-6	32306.4	190.085
9.34519	1H-1,3-Benzimidazole-2-thiol, 5,6-dimethoxy-	50.0145	C9H10N2O2S	74004-74-3	74349.4	210.046
15.2342	1H-1-Pyrindine-2,7-dione, 1-[2-(1,3-benzodioxol-5-yl)ethyl]-3,4,5,6-tetrahydro-	54.3465	C17H17NO4	114942-65-3	32981.9	299.116
29.3396	1H-1-Pyrindine-2,7-dione, 1-[2-(1,3-benzodioxol-5-yl)ethyl]-3,4,5,6-tetrahydro-	54.5251	C17H17NO4	114942-65-3	67719.9	299.116
9.60724	1H-Cyclopropa[3,4]benz[1,2-e]azulene-5,7b,9,9a-tetrol, 1a,1b,4,4a,5,7a,8,9-octahydro-3-(hydroxymethyl)-1,1,6,8-tetramethyl-, 5,9,9a-triacetate, [1aR-(1a.alpha.,1b.beta.,4a.beta.,5.beta.,7a.alpha.,7b.alpha.,8.alpha.,9.beta.,9a.alpha.)]-	52.4919	C26H36O8	77508-64-6	191429	476.241
27.8477	1H-Cyclopropa[3,4]benz[1,2-e]azulene-5,7b,9,9a-tetrol, 3-[(acetyloxy)methyl]-1a,1b,4,4a,5,7a,8,9-octahydro-1,1,6,8-tetramethyl-, 9,9a-diacetate, [1aR-(1a.alpha.,1b.beta.,4a.alpha.,5.beta.,7a.alpha.,7b.alpha.,8.alpha.,9.beta.,9a.alpha.)]-	51.5268	C26H36O8	77550-15-3	77307.8	476.241
13.3623	1-Hexadecanol, TBDMS derivative	73.0883	C22H48OSi	76358-80-0	416280	356.347
29.2807	1-Hexadecanol, TBDMS derivative	53.1105	C22H48OSi	76358-80-0	9650.03	356.347
16.2018	1-Hexadecanol, TBDMS derivative	63.0381	C22H48OSi	76358-80-0	117670	356.347
33.9352	1H-Imidazo[4,5-b]pyridine-2-carboxaldehyde	53.901	C7H5N3O	56805-24-4	111604	147.043
11.9725	1H-Indole-2-carboxylic acid, 3-acetylamino-5,6-dimethoxy-, ethyl ester	55.5569	C15H18N2O5	1000315-94-0	47372.3	306.122
28.2997	1H-Indole-2-carboxylic acid, 6-(4-ethoxyphenyl)-3-methyl-4-oxo-4,5,6,7-tetrahydro-, isobutyl ester	53.9126	C22H27NO4	1000316-17-3	234863	369.194
27.4306	1H-Phenanthro[9,10-d]imidazole, 1,2-diphenyl-	51.3017	C27H18N2	16408-28-9	323027	370.147
14.1319	1H-Purine-2,6-dione,3,7-dihydro-3-methyl-8-(4-carboxy-2-thiabutyl)	50.7559	C10H12N4O4S	1000216-03-2	251170	284.058
19.9263	1H-Pyrrolo[2,3-b]pyridine, 3-iodo-	63.2958	C7H5IN2	23616-57-1	64197.7	243.95
30.6083	1-Hydroxy-2-methylanthraquinone, TMS derivative	50.964	C18H18O3Si	1000103-73-5	147483	310.103
13.0996	1-Hydroxyinden-3-one-1-carboxylic acid	51.1748	C10H8O4	1000215-33-8	57826.3	192.042
15.0244	1-Methyl-N,N-bis(trimethylsilyl)-4-[(trimethylsilyl)oxy]-1H-imidazol-2-amine	88.0404	C13H31N3OSi3	1000333-94-6	6.62614e+06	329.177
27.3369	1-Monopalmitin, 2TMS derivative	82.8319	C25H54O4Si2	1188-74-5	3.4102e+06	474.356
7.30081	1-Pentanone, 1-(4-methylphenyl)-	55.0571	C12H16O	1671-77-8	77508.4	176.12
14.8482	1-Propanol, 2-[[4-(1,1-dimethylethyl)-2,6-dinitrophenyl]amino]-	57.9499	C13H19N3O5	55702-43-7	57849.6	297.132
35.5659	2-(2',4'-Dimethoxyphenyl)-6-methoxy-benzofuran	52.2992	C17H16O4	67685-23-8	42736.9	284.105
5.7274	2-(2-Hydroxy-2-methyl-4-phenyl-but-3-ynylamino)-3-methylpentanoic acid	61.0981	C17H23NO3	1000271-57-0	298881	289.168
32.7295	2-(2-Naphthyl)-2-hydroxypropanoic acid	54.9296	C13H12O3	10441-53-9	18315.7	216.079
14.8003	2(3H)-Furanone, dihydro-3-methylene-5-phenyl-	50.3447	C11H10O2	26613-71-8	29808.8	174.068
6.10234	2-(4-Chlorophenyl)-5-chloro-benzofuran	51.9917	C14H8Cl2O	67024-72-0	1.12131e+06	261.995
34.3226	2-(4-Hydroxy-3-methoxybenzylidene)-5,6-diphenyl-imidazo[2,1-b]thiazol-3-one	67.063	C25H18N2O3S	1000216-48-6	57000.6	426.104
23.9822	2-(4-Methoxy-phenoxy)-6-methyl-4-phenyl-quinazoline	55.9816	C22H18N2O2	1000317-86-4	115184	342.137
22.2012	2-(4-Methoxyphenyl)-8-chloro-4H-imidazo(2,1-c)(1,4)benzoxazine	54.7511	C17H13ClN2O2	104971-84-8	19255.2	312.067
17.8707	2-(4-Pyrrol2-[4-(2-hydroxy-ethoxy)-phenyl]-vinylmorpho-phenoxy)-ethanol	51.8866	C18H20O4	1000317-94-9	4740.09	300.136
11.5808	2(a)-Methoxymethyl-1,2,5-trimethylpiperidin-4(E)-ol	53.8505	C10H21NO2	1000311-30-1	760.622	187.157
25.5623	2-(Ethylamino)ethanol, N-heptafluorobutyryl, O-(tert-butyldimethylsilyl)	51.8385	C14H24F7NO2Si	1000385-92-6	249125	399.146
29.1063	2,2,7,7-tetramethyl-4-(((5-((trimethylsilyloxy)methyl)-1,4-dioxan-2-yl)methoxy)methyl)-3,6-dioxa-2,7-disilaoctane	50.6511	C18H42O6Si3	1000372-69-2	25092.1	438.229
6.55566	2,2-Dimethylperhydro-1,3-oxazine	51.4806	C6H13NO	73155-29-0	54615.5	115.1
30.1107	2,3,7,8,12,13,17,18-Octapropyl-21H,23H-porphine	50.2247	C44H62N4	73405-54-6	33107.4	646.497
31.6945	2,3-Dihydro-4-methyl-(1H)1,5-benzodiazepine-2-thione	51.5961	C10H10N2S	200264-12-6	182623	190.056
22.7519	2,4,5-Trimethoxybenzylamine, PFP	51	C13H14F5NO4	1000072-05-8	8547.99	343.084
5.11881	2,4,6,8,10-Tetradecapentaenoic acid, 9a-(acetyloxy)-1a,1b,4,4a,5,7a,7b,8,9,9a-decahydro-4a,7b-dihydroxy-3-(hydroxymethyl)-1,1,6,8-tetramethyl-5-oxo-1H-cyclopropa[3,4]benz[1,2-e]azulen-9-yl ester, [1aR-(1a.alpha.,1b.beta.,4a.beta.,7a.alpha.,7b.alpha.,8.alpha.,9.beta.,9a.alpha.)]-	52.5561	C36H46O8	77550-17-5	681714	606.319
31.8991	2,4-Dihydroxypropiophenone, 2TMS derivative	58.771	C15H26O3Si2	55724-93-1	317939	310.142
11.1127	2,4-Quinazolinediamine, 6-(phenylsulfonyl)-	52.4158	C14H12N4O2S	51123-24-1	5856.29	300.068
22.1801	2',5,8-Trimethoxyisoflavone	51.2045	C18H16O5	1000066-56-4	1246.57	312.1
13.9136	2,5-Cyclohexadien-1-one, 4,4'-(1,2-ethanediylidene)bis[2,6-bis(1,1-dimethylethyl)-	55.2568	C30H42O2	809-73-4	46639.2	434.318
7.71353	2,5-Di(trifluoromethyl)benzoic acid, 4-nitrophenyl ester	51.7731	C15H7F6NO4	1000357-74-9	247728	379.028
9.12601	2,5-Di(trifluoromethyl)benzoic acid, 5-pentadecyl ester	60.8438	C24H34F6O2	1000338-71-2	79425.1	468.246
9.81132	2,5-Di(trifluoromethyl)benzoic acid, 6-dodecyl ester	56.6744	C21H28F6O2	1000338-69-9	814.125	426.199
14.8321	2,5-Difluorobenzamide, N-(3-methylphenyl)-	57.3084	C14H11F2NO	1000358-04-5	132796	247.081
16.9073	2,5-Di-tert-butyl-4-((trimethylsilyl)oxy)phenol	65.58	C17H30O2Si	1000385-79-1	242815	294.202
19.101	2,6-Bis[4,5-dihydro-4-(1-methylethyl)oxazol-2-yl]pyridine	59.5461	C17H23N3O2	1000327-15-8	471913	301.179
9.47283	2,6-Diethyl-4-phenylpyridine	51.8958	C15H17N	73669-38-2	94285.6	211.136
7.60972	2,6-Dimethyldecane	65.7441	C12H26	13150-81-7	23264.9	170.203
23.5214	2,9-Dihydroxyanthracene-1,4-dione	55.6802	C14H8O4	14597-19-4	1.21431e+06	240.042
21.6755	2-[p-Chlorophenyl]-6-methoxy-8-nitroquinoline	50.1427	C16H11ClN2O3	1000255-96-9	43591.6	314.046
10.1017	2-Amino-5-methyl-4(3H)-oxopyrrolo[2,3-d]pyrimidine	50.5762	C7H8N4O	65062-57-9	14374.9	164.07
11.8525	2-Butenedioic acid, (E)-, 2TMS derivative	71.5599	C10H20O4Si2	17962-03-7	230694	260.09
6.24618	2-cyclopropene-1-carboxylic acid, 2,3-diphenyl-, 2-aminoethyl ester	56.3443	C18H17NO2	1000397-14-7	57309.4	279.126
20.2276	2-Deoxy-D-ribose, tris(trimethylsilyl) ether, methyloxime (syn)	56.3017	C15H37NO4Si3	1000380-44-2	281784	379.203
34.9458	2-Ethylacridine	50.2391	C15H13N	55751-83-2	76241.4	207.105
7.07064	2-Ethylbutyric acid, 3,7-dimethyloctyl ester	61.9881	C16H32O2	1000369-41-9	191106	256.24
28.7864	2-Fluoro-6-trifluoromethylbenzamide, N-(4-methoxyphenyl)-	52.5645	C15H11F4NO2	1000358-11-6	13470.7	313.073
11.1482	2-Fluoro-6-trifluoromethylbenzoic acid, 3-tridecyl ester	50.6444	C21H30F4O2	1000338-53-1	29168.1	390.218
23.8404	2H-1-Benzopyran-2-one, 4,5,7-trimethoxy-3-(4-methoxyphenyl)-	61.5793	C19H18O6	4222-04-02	34364.1	342.11
9.17128	2H-1-Benzopyran-2-one, 4-methyl-7-(2-propenyloxy)-	54.0606	C13H12O3	3993-57-5	436124	216.079
14.0429	2H-1-Benzopyran-2-one, 7-methoxy-6-(3-methylbutyl)-	57.4514	C15H18O3	38409-36-8	79000.2	246.126
10.0607	2H-Benzopyrane-3-carbohydrazide, 2-oxo-	57.3907	C10H8N2O3	1846-91-9	61964.5	204.053
11.3428	2-Mercapto-4,6-dimethylnicotinonitrile, TBDMS derivative	74.0454	C14H22N2SSi	1000332-68-8	1.01666e+06	278.127
6.79883	2-Mercapto-4,6-dimethylnicotinonitrile, TBDMS derivative	63.4351	C14H22N2SSi	1000332-68-8	197706	278.127
6.04111	2-Methylpentyl propionate	58.6981	C9H18O2	185756-33-6	533297	158.131
28.7938	2-Monostearin, 2TMS derivative	72.6667	C27H58O4Si2	53336-13-3	270530	502.387
27.0165	2-Palmitoylglycerol, 2TMS derivative	79.742	C25H54O4Si2	53212-97-8	1.46545e+06	474.356
15.7425	2-Phenazinol, 6-amino-	53.8975	C12H9N3O	18450-04-9	314667	211.075
34.3806	2-Phenyl-1,3-oxazol-2-ine	54.6357	C9H9NO	7127-19-7	65512.6	147.068
34.8151	2-propen-1-one, 1,3-bis[4-[bis(4-methylphenyl)amino]phenyl]-	59.0644	C43H38N2O	1000403-13-0	53228.4	598.298
12.6657	2-Propenoic acid, 3-(3-hydroxyphenyl)-, methyl ester	51.1795	C10H10O3	3943-95-1	10500.7	178.063
28.9774	2-propenoic acid, 3-[4-[bis(4-methylphenyl)amino]phenyl]-2-cyano-, ethyl ester	61.504	C26H24N2O2	1000398-91-1	219641	396.184
16.0387	2-Pyridinamine, N,N-diethyl-3-methyl-4,5,6-triphenyl-	53.6966	C28H28N2	65660-26-6	150012	392.225
8.24912	2-Pyrrolidinone, TMS derivative	54.9899	C7H15NOSi	14468-90-7	279511	157.092
16.5518	3-(4-Cyanomethyl-5-methoxymethyl-1H-pyrrol-3-yl)-propionitrile	52.8143	C11H13N3O	195449-06-0	639778	203.106
16.4209	3-(Benzo(b)thien-6-yl)propionic acid	50.0636	C11H10O2S	6701-52-6	793.938	206.04
22.7396	3,3-Dimethoxycarbonyl-cis-(2,2')(5,5')pyridinophane	52.7274	C18H18N2O4	1000148-86-7	7418.34	326.127
11.4465	3,5-Bis(trifluoromethyl)benzylamine, N-tert-butyldimethylsilyl-	57.266	C15H21F6NSi	1000417-33-0	92585.1	357.135
14.8443	3,5-di-tert-Butyl-4-hydroxyphenylpropionic acid	80.1394	C17H26O3	20170-32-5	7.34604e+06	278.188
8.8564	3,6-Diamino-2-benzoyl-4-isopropylthieno[2,3-b]pyridine-5-carbonitrile	58.3803	C18H16N4OS	1000306-43-2	11314.6	336.104
14.2605	3,7-dioxa-2,8-disilanonane, 2,2,8,8-tetramethyl-5,5-bis[[(trimethylsilyl)oxy]methyl]-	70.028	C17H44O4Si4	1000402-79-1	447277	424.232
22.6114	3,9-Epoxypregnane-11,14,18-triol-20-one, 16-cyano-3-methoxy-, 11-acetate	53.9038	C25H35NO7	1000194-66-5	190577	461.241
8.11797	3-Amino-4-methoxybenzoic acid	63.9533	C8H9NO3	2840-26-8	324034	167.058
7.93581	3-Aminopropanol, 2TBDMS derivative	65.2089	C15H37NOSi2	1000333-00-9	513441	303.241
11.3003	3-Azido-2-bromo-1,3-diphenylpropenone	53.075	C15H10BrN3O	1000311-95-1	43380.3	327.001
33.7489	3-Ethoxy-4-hydroxymandelic acid, 3TMS derivative	55.3338	C19H36O5Si3	1000292-73-1	306224	428.187
5.30575	3-Ethyl-2,2-dimethyl-3-pentyl methylphosphonofluoridate	52.9818	C10H22FO2P	159395-78-5	195243	224.134
24.8663	3H-naphtho[1,2,3-de]quinoline-2,7-dione, 1-amino-6-bromo-3-methyl-	52.543	C17H11BrN2O2	1000402-54-9	45678.9	354
10.4981	3-Methyl-2-methylimino-5-(4-pyrrolidinyl)benzylidene-thiazolidin-4-one	69.4222	C16H19N3OS	333745-16-7	165645	301.125
6.77373	3-Methylbenzylamine, N,N-dibutyl-	51.8553	C16H27N	1000310-40-5	1564.6	233.214
18.2599	3-Trifluoromethylbenzylamine, N,N-didecyl	55.5912	C28H48F3N	1000310-29-8	25355.6	455.374
11.0903	3-Trifluoromethylbenzylamine, N,N-dioctyl-	66.9934	C24H40F3N	1000310-29-6	66508.3	399.311
7.95568	4-(4-Methylbenzoylmethyl)-2H-1,4-benzoxazin-3(4H)-one	51.7691	C17H15NO3	105492-44-2	99607.2	281.105
11.1697	4-(Acridin-9-yl)-1,3-benzenediamine	56.296	C19H15N3	1000326-84-9	116486	285.127
13.7548	4,5-Bis(methylamino)-fluorene	50.474	C15H16N2	122779-23-1	12175.9	224.131
22.6232	4,6-Dimethyl-4'-hydroxy-2-benzylidene-coumaran-3-one	58.7907	C17H14O3	2567-73-9	113922	266.094
14.6839	4-Aminobutanoic acid, 3TMS derivative	91.3509	C13H33NO2Si3	39508-23-1	1.26292e+07	319.182
14.0996	4-Bromofuran-2-carboxylic acid	50.5845	C5H3BrO3	3439-02-09	22003.1	189.927
16.261	4-Estren-4,17.beta.-diol-3-one, tri-trimethylsilyl	63.3798	C27H50O3Si3	1000412-28-4	54131.1	506.307
6.52346	4-Fluoro-2-methoxyphenol	56.0283	C7H7FO2	450-93-1	58652.1	142.043
10.3976	4H-1,3-Oxazine, 5,6-dihydro-2,4,4,6-tetramethyl-	66.5019	C8H15NO	26939-18-4	544321	141.115
11.1857	4H-1-Benzopyran-4-one, 3,7-dihydroxy-2-(3-hydroxy-4-methoxyphenyl)-	63.0857	C16H12O6	57396-72-2	223350	300.063
35.6622	4H-Cyclopropa[5',6']benz[1',2':7,8]azuleno[5,6]oxiren-4-one, 8,8a-bis(acetyloxy)-2a-[(acetyloxy)methyl]-1,1a,1b,1c,2a,3,3a,6a,6b,7,8,8a-dodecahydro-6b-hydroxy-3a-methoxy-1,1,5,7-tetramethyl-, [1aR-(1a.alpha.,1b.beta.,1c.beta.,2a.beta.,3a.alpha.,6a.alpha.,6b.alpha.,7.alpha.,8.beta.,8a.alpha.)]-	51.6892	C27H36O10	64838-69-3	405627	520.231
9.61729	4H-Naphtho[2,3-b]pyran-4-one, 5-methoxy-2-methyl-	53.4985	C15H12O3	55134-00-4	153511	240.079
6.08887	4H-thiopyran-4-one, 2,6-diphenyl-	50.1978	C17H12OS	1000401-62-3	96513.2	264.061
28.9635	4-Hydroxyanthraquinone-2-carboxylic acid, di-TMS	51.862	C21H24O5Si2	1000103-01-3	43481.8	412.116
12.3949	4-Hydroxypyridine, heptafluorobutyrate	52.0077	C9H4F7NO2	1000376-21-8	72605.8	291.013
10.1911	4-Propylacridine	58.5638	C16H15N	65753-74-4	15083.9	221.12
6.28135	4-Pyridinol, TMS derivative	76.8847	C8H13NOSi	1000352-50-3	1.3065e+06	167.077
21.5945	4-Trichloromethylheptafluorotoluene	53.3702	C8Cl3F7	136264-70-5	30147.8	333.895
11.0441	5-(5-N-Methylindolinyl)barbituric acid, 5-hydroxy-	50.5732	C13H13N3O4	1000159-28-2	19218	275.091
35.092	5,7-Dihydroxy-3-[2,3-dihydro-4-hydroxy-2-(2-hydroxyisopropyl)benzofuran-7-yl]chromone	51.0153	C20H18O7	99347-41-8	170636	370.105
17.8277	5-Butyl-5-ethylheptadecane	57.4558	C23H48	1000360-43-0	298834	324.376
29.37	5H-Cyclopropa[3,4]benz[1,2-e]azulen-5-one, 9,9a-bis(acetyloxy)-3-[(acetyloxy)methyl]-2-chloro-1,1a,1b,2,3,4,4a,7a,7b,8,9,9a-dodecahydro-3,4a,7b-trihydroxy-1,1,6,8-tetramethyl-, [1aR-(1a.alpha.,1b.beta.,2.alpha.,3.alpha.,4a.beta.,7a.alpha.,7b.alpha.,8.alpha.,9.beta.,9a.alpha.)]-	51.8493	C26H35ClO10	77573-33-2	197626	542.192
26.738	5H-Cyclopropa[3,4]benz[1,2-e]azulen-5-one, 9,9a-bis(acetyloxy)-3-[(acetyloxy)methyl]-2-chloro-1,1a,1b,2,3,4,4a,7a,7b,8,9,9a-dodecahydro-3,4a,7b-trihydroxy-1,1,6,8-tetramethyl-, [1aR-(1a.alpha.,1b.beta.,2.alpha.,3.alpha.,4a.beta.,7a.alpha.,7b.alpha.,8.alpha.,9.beta.,9a.alpha.)]-	51.7843	C26H35ClO10	77573-33-2	124503	542.192
8.47157	5H-Thiazolo[3,2-a]pyrimidine-6-carboxamide, 5-oxo-	50.9636	C7H5N3O2S	1000362-67-2	106415	195.01
14.1245	5-Iodopentan-2-one	61.9893	C5H9IO	3695-29-2	217525	211.97
15.2005	5-Nitrofuran-2-carboxylic acid	55.0114	C5H3NO5	645-12-5	100425	157.001
33.9022	6-(4-Fluoro-phenyl)-benzo[4,5]imidazo[1,2-c]quinazoline	50.5176	C20H12FN3	70371-91-4	78161.5	313.102
26.6331	6,7-Dimethoxy-2-[(pyrimidin-2-yl)amino]-3H-quinazolin-4-one	52.5937	C14H13N5O3	1000388-64-7	33345	299.102
11.9063	7-Hydroxy-3-methyl-14H-5-thia-14-aza-pentaphene-8,13-dione	57.921	C21H13NO3S	313225-03-5	234930	359.062
13.9457	7-Hydroxy-7,8,9,10-tetramethyl-7,8-dihydrocyclohepta[d,e]naphthalene	52.6617	C18H20O	1000110-34-9	109798	252.151
16.8825	7-Propyl-1H-indole-2,3-dione, TMS derivative	50.803	C14H19NO2Si	1000143-13-6	104938	261.119
12.4848	7-Thio-3-.beta.-d-ribofuranosylpyrazolo[4,3-d]pyrimidine-5(4H,6H)-dione	59.5353	C10H12N4O5S	103090-43-3	2249.32	300.053
12.274	8-Methoxy-1,3,4,4a,5,6-hexahydro-2H-benzo[5,6]cyclohepta[1,2-b]pyridin-2-one, TBDMS derivative	57.1848	C21H31NO2Si	1000332-49-4	98577.8	357.212
11.2238	9-Borabicyclo[3.3.1]nonane, 9-[(3-phenyl-1-thioxo-2-propenyl)thio]-	59.0134	C17H21BS2	139759-18-5	337321	300.118
22.0965	9-Chloro-1-fluoro-12H-[1,3]benzothiazolo[2,3-b]quinazolin-12-one	56.0162	C14H6ClFN2OS	1000298-07-3	38219.9	303.987
21.5662	9H-fluorene-4-carboxylic acid, 2,7-dinitro-9-oxo-	53.5791	C14H6N2O7	1000402-27-4	26565.4	314.018
23.6515	9-Octadecenoic acid, (E)-, TMS derivative	72.6907	C21H42O2Si	96851-47-7	681653	354.295
18.581	Acetaldehyde, [(trimethylsilyl)oxy]-, O-[bis[(trimethylsilyl)oxy]phosphinyl]oxime	50.5392	C11H30NO5PSi3	55282-61-6	85422.8	371.117
6.00336	Acetamide, 2-chloro-	55.0069	C2H4ClNO	1979-07-02	246372	92.998
26.4351	Acetic acid, 4,4,6a,6b,8a,11,11,14b-octamethyl-13-oxodocosahydropicen-3-yl ester	52.295	C32H52O3	1000194-71-1	1.06609e+06	484.392
10.0493	Acetohydroxamic acid	59.6396	C2H5NO2	546-88-3	117043	75.032
22.2368	Acridine, 1,2,3,4-tetrahydro-5-phenyl-	56.2245	C19H17N	49577-51-7	90606.3	259.136
27.7528	Adenosine, 4TMS derivative	61.1404	C22H45N5O4Si4	53294-33-0	242161	555.255
10.472	Alanine, N-methyl-n-butoxycarbonyl-, hexadecyl ester	70.5979	C25H49NO4	1000329-38-0	608179	427.366
13.7386	Aminomalonic acid, tris(trimethylsilyl)-	73.9055	C12H29NO4Si3	1000079-52-5	100386	335.14
28.0253	Androstan-17-one, 3-[(trifluoroacetyl)oxy]-, (3.beta.,5.alpha.)-	56.621	C21H29F3O3	3959-78-2	117858	386.207
23.5414	Androstan-17-one, 3-[(tripropylsilyl)oxy]-, (3.beta.,5.alpha.)-	51.1091	C28H50O2Si	65598-89-2	41467.5	446.358
15.7265	Anthraquinone, 1-(o-chlorophenyl)-	66.3216	C20H11ClO2	20600-79-7	88102	318.045
26.5021	Arabinofuranose, 1,2,3,5-tetrakis-O-(trimethylsilyl)-	64.3424	C17H42O5Si4	55399-49-0	287945	438.211
25.1767	Arachidonic acid, TMS derivative	85.7927	C23H40O2Si	113516-18-0	530428	376.28
32.2581	Benz[c]acridine, 9,11-diethyl-7-methyl-	53.9685	C22H21N	3518-08-09	94426	299.167
35.2922	Benzamide, 2,3,4-trifluoro-N-(2,4-dimethoxyphenyl)-	63.156	C15H12F3NO3	1000339-09-3	414459	311.077
32.4157	Benzamide, 2-methoxy-N-(2-fluorophenyl)-	60.427	C14H12FNO2	1000339-10-8	5.80551e+06	245.085
8.78524	Benzamide, 3-methyl-N-(2-bromophenyl)-	54.1311	C14H12BrNO	1000339-10-3	58552	289.01
10.9712	Benzamide, N-(4,5,6,7-tetrahydro-2-benzothiazolyl)-2-methoxy-4-methylthio-	60.2886	C16H18N2O2S2	299922-27-3	23610.8	334.081
21.5252	Benzamide, p-nitro-N-3H-[1,2,4]thiadiazolo[4,3-a]pyridin-3-ylidene-	53.0006	C13H8N4O3S	28912-76-7	1688.31	300.032
10.8045	Benzenamine, 2-(cyclopropylmethyl)-4,5-dimethoxy-	52.5369	C12H17NO2	1000327-32-3	124764	207.126
13.3182	Benzenamine, 2,3,4,5,6-pentafluoro-N,N-dimethyl-	55.7665	C8H6F5N	1801-14-5	25506.7	211.042
12.1032	benzenamine, 4-ethenyl-N,N-bis(4-methylphenyl)-	55.0386	C22H21N	1000402-13-9	593699	299.167
24.4582	benzenamine, N,N-dimethyl-4-(1H-naphtho[2,1-b]pyran-3-yl)-	52.6709	C21H19NO	1000397-53-6	1859.77	301.147
14.8824	Benzenamine, N,N-diphenyl-	59.5618	C18H15N	603-34-9	80104.9	245.12
10.4407	Benzenaminium, 4-carboxy-N,N,N-trimethyl-, hydroxide, inner salt	59.7681	C10H13NO2	33046-28-5	215500	179.095
28.9581	Benzene, 1,1'-(1,1,2,2,3,3-hexafluoro-1,3-propanediyl)bis[2,3,4,5,6-pentafluoro-	54.6048	C15F16	25078-75-5	123511	483.974
11.1058	benzeneacetonitrile, 4-hydroxy-.alpha.-(4-hydroxyphenyl)-.alpha.-phenyl-	63.4807	C20H15NO2	1000402-15-4	22953	301.11
20.425	benzenemethanol, 4-[bis(phenylmethyl)amino]-.alpha.-methyl-	56.6859	C22H23NO	1000397-81-8	19348.8	317.178
12.7973	benzenepropanoic acid, 4-[(4-formylphenyl)phenylamino]-, ethyl ester	68.0188	C24H23NO3	1000398-64-6	82812	373.168
14.5445	Benzenesulfonamide, 4-fluoro-N-(2-oxo-2,3-dihydro-1H-indol-7-yl)-	60.4534	C14H11FN2O3S	1000303-02-8	3.26094e+06	306.047
22.0318	Benzimidazo[2,1-a]isoquinoline	66.1559	C15H10N2	239-44-1	16261.5	218.084
9.98749	Benzimidazolium, 1,2-dimethyl-, 3-(hexahydro-1,3-dimethyl-2,4,6-trioxo-5-pyrimidinylide)	51.2771	C15H16N4O3	27355-95-9	887.144	300.122
18.776	Benzo[b]thiophene-3-carboxylic acid, 2-acetylamino-7-hydroxy-6-phenylsulfanyl-, ethyl ester	53.5802	C19H17NO4S2	1000302-32-5	180675	387.06
28.5992	Benzo-12-crown-4, 4'-(1,4,6,7-tetrahydro-1-methyl-5,8-dioxoimidazo[4,5-e][1,4]diazepin-7-yl)-	54.684	C19H22N4O6	220876-86-8	160187	402.154
32.8658	Benzoic acid, 4-chloro-2-nitro-, 2-chloro-4-nitrophenyl ester	53.6524	C13H6Cl2N2O6	1000272-14-2	79209.4	355.96
8.51886	Benzoic acid, 4-isopropyl-, ethyl ester	51.0072	C12H16O2	1000302-79-8	70381	192.115
32.4132	Benzoic acid, pentafluorophenyl ester	54.0977	C13H5F5O2	1000360-67-9	1.59737e+07	288.021
8.18705	Benzonitrile, 3,5-bis(1,1-dimethylethyl)-4-hydroxy-	66.5222	C15H21NO	1988-88-1	615666	231.162
13.406	benzonitrile, 4-[[2-amino-5-(dimethylamino)phenyl]sulfonyl]-	53.4737	C15H15N3O2S	1000397-53-4	1060	301.088
12.2033	Benzophenone, 2-(methylamino)-5-methyl-	53.6812	C15H15NO	39106-78-0	847.648	225.115
13.4652	benzothiazole, 2,2'-thiobis-	51.7811	C14H8N2S3	1000402-14-7	103836	299.985
8.94337	benzoxazole, 6-nitro-2-phenyl-	53.8371	C13H8N2O3	1000401-19-0	80113.7	240.053
13.088	benzoyl chloride, 2-(chlorosulfonyl)-4-nitro-	53.5519	C7H3Cl2NO5S	1000401-94-9	100058	282.911
9.04934	Bis(trimethylsilyl) sulfite	62.0365	C6H18O3SSi2	1000366-57-2	64219.8	226.052
13.488	Bismuthine, tripropyl-	55.0829	C9H21Bi	3692-82-8	43069.3	338.145
11.4008	Bismuthine, tripropyl-	55.3784	C9H21Bi	3692-82-8	30680	338.145
14.2047	Bisphenol A monomethyl ether, TMS derivative	61.3396	C19H26O2Si	1000283-55-5	14707.6	314.17
5.33701	Boron, diethyl(5-ethyl-4,6-nonanediiminato-N,N')-, (t-4)-	54.9472	C15H31BN2	136705-03-8	95340.9	250.258
27.0545	Butyl 4,7,10,13,16,19-docosahexaenoate	67.1098	C26H40O2	1000336-80-3	1.28599e+06	384.303
20.8071	Butylphosphonic acid, heptyl 4-(2-phenylprop-2-yl)phenyl ester	71.9823	C26H39O3P	1000323-09-7	93250.7	430.264
32.4001	Cholesterol, TMS derivative	79.9873	C30H54OSi	1856-05-9	7.93491e+07	458.394
28.6529	Chromone, 7-(2-chloroethoxy)-3-phenyl-	55.6097	C17H13ClO3	165557-89-1	57554.7	300.055
18.7419	Citric acid, 4TMS derivative	57.4006	C18H40O7Si4	14330-97-3	74635.7	480.185
16.9073	Cobalt, acetylacetonato-(.eta.-5-tetramethylcyclopentadienyl)-	51.963	C14H20CoO2	1000164-38-2	118549	279.08
10.9853	Conanine, (5.alpha.)-	65.6343	C22H37N	468-33-7	246481	315.293
17.4706	Conanine, (5.alpha.)-	61.2353	C22H37N	468-33-7	9698.63	315.293
18.5008	Conanine, (5.alpha.)-	50.3772	C22H37N	468-33-7	6345.96	315.293
11.7225	Conanine, (5.alpha.)-	60.8687	C22H37N	468-33-7	42516.9	315.293
14.6492	Conanine, (5.alpha.)-	61.1188	C22H37N	468-33-7	1429.08	315.293
20.0929	Conanine, (5.alpha.)-	55.2743	C22H37N	468-33-7	44359.4	315.293
11.9063	Conanine, (5.alpha.)-	50.2015	C22H37N	468-33-7	174575	315.293
11.9823	Conanine, (5.alpha.)-	51.1598	C22H37N	468-33-7	86800.3	315.293
11.4772	Conanine, (5.alpha.)-	66.1072	C22H37N	468-33-7	151058	315.293
10.8504	Coronene	50.0733	C24H12	191-07-1	78575.8	300.094
7.27034	Cyclobutane, 1-bromo-3-chloro-	51.6781	C4H6BrCl	4935-03-09	13367.3	167.934
28.682	Cyclodecasiloxane, eicosamethyl-	73.9457	C20H60O10Si10	18772-36-6	149659	740.188
33.1758	Cyclodecasiloxane, eicosamethyl-	59.5385	C20H60O10Si10	18772-36-6	188758	740.188
21.8601	Cyclodecasiloxane, eicosamethyl-	70.0146	C20H60O10Si10	18772-36-6	490993	740.188
24.8552	Cyclodecasiloxane, eicosamethyl-	68.3535	C20H60O10Si10	18772-36-6	155642	740.188
29.7992	Cyclodecasiloxane, eicosamethyl-	74.704	C20H60O10Si10	18772-36-6	372085	740.188
20.1511	Cyclodecasiloxane, eicosamethyl-	70.3426	C20H60O10Si10	18772-36-6	188598	740.188
18.2825	Cyclononasiloxane, octadecamethyl-	63.4654	C18H54O9Si9	556-71-8	105502	666.169
16.1727	Cyclooctasiloxane, hexadecamethyl-	73.5579	C16H48O8Si8	556-68-3	112439	592.15
9.94205	Cyclopentanecarboxylic acid, 2-naphthyl ester	57.8862	C16H16O2	1000307-58-1	1183.39	240.115
16.867	Cyclopropanamine, N-methyl-1-phenyl-	54.8851	C10H13N	56771-48-3	120564	147.105
15.0599	Cysteine, 3TMS derivative	60.1197	C12H31NO2SSi3	1000153-02-1	47653.1	337.138
6.6704	D-(-)-Lactic acid, 2TMS derivative	90.9422	C9H22O3Si2	1000333-99-1	6.36512e+07	234.111
19.7114	D-(+)-Talose, pentakis(trimethylsilyl) ether, methyloxime (syn)	88.4258	C22H55NO6Si5	1000380-18-7	787818	569.288
16.8057	D-Arabinose, tetrakis(trimethylsilyl) ether, ethyloxime (isomer 2)	71.8531	C19H47NO5Si4	1000394-64-9	300165	481.253
14.7312	Decahydronaphtho[2,3-b]furan-2-one, 3-[(1,5-dimethylhexylamino)methyl]-8a-methyl-5-methylene-	50.7925	C23H39NO2	1000304-68-2	54187.2	361.298
8.66721	Decane, 3-methyl-	66.1305	C11H24	13151-34-3	197737	156.188
5.94347	Decane, 5-methyl-	72.7866	C11H24	13151-35-4	490928	156.188
32.7655	Desmosterol, TMS derivative	51.7475	C30H52OSi	18880-60-9	230682	456.379
19.3814	D-Fructose, 1,3,4,5,6-pentakis-O-(trimethylsilyl)-, O-methyloxime	56.9938	C22H55NO6Si5	56196-14-6	26496.1	569.288
19.9438	d-Glucose, 2,3,4,5,6-pentakis-O-(trimethylsilyl)-, o-methyloxyme, (1E)-	72.8415	C22H55NO6Si5	130405-10-6	107802	569.288
11.0086	Dibenz[a,c]cycloheptan-9-amine, 2,3,4-trimethoxy-N-acetyl-	50.6113	C20H23NO4	1000126-66-0	53026.1	341.163
14.2441	Dibenz[b,d]cycloheptanol, 2,3,9-trimethoxy-	52.7126	C18H20O4	145068-62-8	275497	300.136
10.5226	Dihydropyranno(3,2-g)chromanone	57.9921	C12H12O3	57052-80-9	73894.3	204.079
6.02219	Diisopropylamine	64.807	C6H15N	108-18-9	226414	101.12
19.9679	Disiloxane, 1,1,3,3-tetramethyl-1,3-bis(4-methylphenyl)-	55.7397	C18H26OSi2	18055-70-4	50238.3	314.152
8.14143	Disiloxane, ethylpentamethyl-	63.2651	C7H20OSi2	6231-60-3	1.2156e+07	176.105
25.5521	D-Myo-Inositol, 1,2,4,5,6-pentakis-O-(trimethylsilyl)-, bis(trimethylsilyl) phosphate	78.6416	C27H69O9PSi7	55568-91-7	1.85654e+06	764.306
19.2884	D-Pinitol, pentakis(trimethylsilyl) ether	62.759	C22H54O6Si5	1000380-13-4	64497.3	554.277
14.3018	D-Pipecolic acid, TBDMS derivative	67.7773	C12H25NO2Si	1000364-32-9	842557	243.165
20.0123	Eicosane	58.0526	C20H42	112-95-8	10133.4	282.329
28.6159	Estra-1,3,5(10)-trien-6-one, 3,17-bis(acetyloxy)-2-methoxy-, (17.beta.)-	56.5733	C23H28O6	69540-62-1	455522	400.189
8.38219	Ethanamine, 2TMS derivative	71.4705	C8H23NSi2	2477-39-6	330033	189.137
8.6376	Ethanimidic acid, N-(trimethylsilyl)-, trimethylsilyl ester	60.3737	C8H21NOSi2	10416-59-8	1.39031e+06	203.116
10.3807	Ethanolamine, 3TMS derivative	80.6351	C11H31NOSi3	5630-81-9	1.90647e+06	277.171
23.7722	Ethylamine, N,N-diundecyl-2-(2-thiophenyl)-	51.5868	C28H53NS	1000310-35-1	35445.2	435.39
5.3745	Ethylene glycol, 2TMS derivative	87.4615	C8H22O2Si2	7381-30-8	2.21074e+06	206.116
9.63322	Ethylphosphonic acid, 2TMS derivative	68.7094	C8H23O4PSi2	17882-98-3	250726	270.087
11.8409	Etoxeridine	61.7861	C18H27NO4	469-82-9	40183.1	321.194
7.07692	Fumaric acid, 8-chlorooctyl tridecyl ester	55.0081	C25H45ClO4	1000348-53-9	213520	444.301
14.8128	Fumaric acid, isobutyl tetrahydrofurfuryl ester	54.6985	C13H20O5	1000330-57-8	110451	256.131
16.0178	Glutaric acid, dec-2-yl 2,2,3,3,3-pentafluoropropyl ester	56.3927	C18H29F5O4	1000393-67-7	185504	404.199
18.109	Glutaric acid, monocloride, pentafluorobenzyl ester	58.721	C12H8ClF5O3	1000358-88-5	4009.65	330.008
29.1103	Glycerol monostearate, 2TMS derivative	82.7608	C27H58O4Si2	1188-75-6	2.69596e+06	502.387
10.5048	Glycerol, 3TMS derivative	82.1248	C12H32O3Si3	6787-10-06	6.20311e+06	308.166
11.0552	Glycine, 3TMS derivative	89.8841	C11H29NO2Si3	5630-82-0	3.98176e+06	291.151
6.97346	Glycolic acid, 2TMS derivative	63.3127	C8H20O3Si2	33581-77-0	187252	220.095
14.1239	Heneicosane	66.2464	C21H44	629-94-7	415390	296.344
17.2315	Heneicosane	74.4515	C21H44	629-94-7	671077	296.344
22.7753	Heptadecanoic acid, TMS derivative	79.4563	C20H42O2Si	55517-58-3	1.34309e+07	342.295
6.38401	Heptafluorobutyric acid, 3,5-dimethylphenyl ester	56.7158	C12H9F7O2	1000307-62-9	200426	318.049
25.6912	Heptasiloxane, hexadecamethyl-	52.0616	C16H48O6Si7	541-01-5	299176	532.184
22.6838	Heptasiloxane, hexadecamethyl-	56.4937	C16H48O6Si7	541-01-5	136099	532.184
24.2698	Heptasiloxane, hexadecamethyl-	56.0994	C16H48O6Si7	541-01-5	182413	532.184
29.489	Heptasiloxane, hexadecamethyl-	53.5081	C16H48O6Si7	541-01-5	392373	532.184
19.1621	Heptasiloxane, hexadecamethyl-	57.2069	C16H48O6Si7	541-01-5	112605	532.184
15.8201	Hexadecane	51.2069	C16H34	544-76-3	48942	226.266
10.1229	Hexadecane, 1-iodo-	56.8239	C16H33I	544-77-4	62612.4	352.163
10.2354	Hexadecane, 7-methyl-	57.9495	C17H36	26730-20-1	430616	240.282
23.8771	Hexadecanoic acid, 2-pentadecyl-1,3-dioxan-5-yl ester, trans-	59.3921	C35H68O4	41563-17-1	3.20374e+06	552.512
9.92713	Hexahydro-1,3,5-trinitroso-1,3,5-triazine	70.8663	C3H6N6O3	13980-04-6	497094	174.05
27.1636	Inosine, 4TMS derivative	80.5616	C22H44N4O5Si4	1000332-74-7	1.25858e+06	556.239
23.4562	Inositol, 1,2,4,5-tetrakis-O-(trimethylsilyl)-, bis[bis(trimethylsilyl) phosphate], myo-	57.1987	C30H78O12P2Si8	33981-93-0	169270	916.312
35.8898	Iodoacetonitrile	52.4556	C2H2IN	624-75-9	56013	166.923
9.38204	Isoindole-1,3(2H)-dione, 2-(2-chlorophenyl)-5-fluoro-	51.2871	C14H7ClFNO2	299963-94-3	46228.8	275.015
32.4092	Isonicotinic acid, N'-acridin-9-yl-hydrazide	55.6772	C19H14N4O	1000317-39-5	33924.2	314.117
13.5673	Isophthalic acid, 2-fluorophenyl propyl ester	58.5748	C17H15FO4	1000344-65-0	543.662	302.095
15.102	Isophthalic acid, di(2,6-dichlorophenyl) ester	53.1747	C20H10Cl4O4	1000344-62-9	87322.7	453.933
26.1962	Isopropyl-[2-(4-methoxy-2,6-dimethyl-phenyl)-2H-benzo[f]indazol-3-yl]-amine	56.4863	C23H25N3O	1000189-65-2	135157	359.2
33.8865	JWH 018 2'-naphthyl-N-(2-methylbutyl) isomer	50.0348	C24H23NO	1000385-99-1	99784	341.178
23.8566	Kaur-16-en-18-oic acid, 6,7,19-trihydroxy-, .gamma.-lactone, (4.alpha.,6.alpha.,7.beta.)-	56.7519	C20H28O4	7758-47-6	157859	332.199
14.5536	L-5-Oxoproline, , 2TMS derivative	86.3337	C11H23NO3Si2	30274-77-2	1.38135e+07	273.122
7.45513	L-Alanine, 2TMS derivative	87.2532	C9H23NO2Si2	27844-07-1	3.85367e+06	233.127
13.0457	L-Aspartic acid, 2TMS derivative	58.37	C10H23NO4Si2	1000333-28-8	240552	277.117
14.5335	L-Aspartic acid, 3TMS derivative	81.5955	C13H31NO4Si3	55268-53-6	3.47454e+06	349.156
16.0262	L-Glutamic acid, 3TMS derivative	88.1147	C14H33NO4Si3	15985-07-6	5.1705e+06	363.172
10.8385	l-Norleucine, N-ethoxycarbonyl-, decyl ester	63.5591	C19H37NO4	1000329-58-5	273012	343.272
6.49246	l-Norvaline, N-(2-methoxyethoxycarbonyl)-, undecyl ester	61.7414	C20H39NO5	1000328-64-3	303708	373.283
8.15421	l-Norvaline, N-methoxycarbonyl-, pentyl ester	59.1317	C12H23NO4	1000320-76-0	151530	245.163
16.1139	L-Phenylalanine, 2TMS derivative	67.8671	C15H27NO2Si2	7364-51-4	63006.7	309.158
10.5026	L-Phenylalanine, N-(trifluoroacetyl)-, 1-methylbutyl ester	51.6025	C16H20F3NO3	58072-48-3	1.32713e+06	331.14
10.9133	L-Proline, 2TMS derivative	61.9378	C11H25NO2Si2	7364-47-8	415283	259.142
15.1101	L-Threonic acid, tris(trimethylsilyl) ether, trimethylsilyl ester	79.0945	C16H40O5Si4	1000352-53-3	628866	424.195
12.3949	L-Threonine, 3TMS derivative	83.6299	C13H33NO3Si3	7537-02-02	72605.8	335.177
10.9389	L-Tyrosine, N-acetyl-, ethyl ester	53.3805	C13H17NO4	840-97-1	24851	251.116
9.48186	L-Valine, 2TMS derivative	79.5834	C11H27NO2Si2	7364-44-5	714434	261.158
28.7986	l-Valine, n-pentafluoropropionyl-, propyl ester	70.9517	C11H16F5NO3	1000320-87-9	82836.4	305.105
14.0354	Malic acid, 3TMS derivative	74.5525	C13H30O5Si3	38166-11-9	555750	350.14
21.0083	Malonic acid, 2-(2,3-dihydrobenzo[b]furan-5-yl)-2-hydroxy-, dimethyl ester	51.2928	C13H14O6	1000158-50-7	106134	266.079
10.3853	Malonic acid, di(3,3-dimethylbut-2-yl) ester	59.1084	C15H28O4	1000348-67-0	188697	272.199
5.17999	Manganese, tricarbonyl(.eta.5-2,4-cyclopentadien-1-yl)-	50.0864	C8H5MnO3	12079-65-1	275911	203.962
35.2349	Methyl 2-[2-(4-chlorophenyl)-5-methyl-1H-imidazol-1-yl]dithiobenzoate	63.1702	C18H15ClN2S2	105251-31-8	51723.4	358.037
23.5495	Methyl N-[2-thienylsulfonyl]dithiocarbamate	54.0206	C6H7NO2S4	57381-14-3	1.07123e+06	252.936
6.24114	Methyltris(trimethylsiloxy)silane	86.8449	C10H30O3Si4	17928-28-8	1.51769e+06	310.127
26.0425	Myo-Inositol, 1,3,4,5,6-pentakis-O-(trimethylsilyl)-, bis(trimethylsilyl) phosphate	52.166	C27H69O9PSi7	33910-06-4	198495	764.306
22.0617	Myo-Inositol, 6TMS derivative	89.0044	C24H60O6Si6	2582-79-8	1.24392e+07	612.301
9.85492	Myristic acid vinyl ester	52.0449	C16H30O2	5809-91-6	54035.9	254.225
19.2037	Myristic acid, TMS derivative	70.0771	C17H36O2Si	18603-17-3	305933	300.248
12.8896	N-(10-Methyl-10H-acridin-9-ylidene)-N'-phenyl-hydrazine	55.8416	C20H17N3	1000286-25-6	23754.7	299.142
22.0439	N-(2-Hydroperfluoroisobutyl)-N,N-di(2-propynyl)amine	51.6468	C10H7F8N	26457-87-4	36687.7	293.045
8.90322	N-[(4-Butoxyphenyl)methylidene]-4-ethylaniline	53.6102	C19H23NO	29743-15-5	6602.47	281.178
6.10373	Nonane, 2,6-dimethyl-	72.61	C11H24	17302-28-2	1.37822e+06	156.188
6.68444	Nonane, 4,5-dimethyl-	83.2111	C11H24	17302-23-7	3.09435e+06	156.188
10.0197	Nonane, 5-methyl-5-propyl-	67.2661	C13H28	17312-75-3	403081	184.219
32.3932	o-(2,4,6-Trinitroanilino)phenyl acetate	52.4962	C14H10N4O8	1000244-61-9	340272	362.05
7.13336	O,O'-(2,2'-Biphenylylene)dithiophosphoric acid	50.4936	C12H9O2PS2	68560-86-1	467.622	279.978
7.49763	Octane, 5-ethyl-2-methyl-	83.8643	C11H24	62016-18-6	630990	156.188
14.5683	o-Iodohippuric acid	56.4616	C9H8INO3	147-58-0	75028.5	304.955
32.3886	Orotic acid	54.1288	C5H4N2O4	65-86-1	105196	156.017
32.6199	o-Toluic acid, TMS derivative	58.0029	C11H16O2Si	55557-15-8	252015	208.092
17.1678	Oxalic acid, bis(6-ethyloct-3-yl) ester	56.703	C22H42O4	1000309-34-6	290492	370.308
24.0783	Oxalic acid, diamide, N,N'-bis(2-methoxyphenyl)-	51.3371	C16H16N2O4	1000309-28-1	70804.7	300.111
8.20278	Oxazole, 2,5-dihydro-2,2-dimethyl-4,5-diphenyl-	53.4504	C17H17NO	51304-30-4	112105	251.131
21.6352	Palmitic Acid, TMS derivative	87.1929	C19H40O2Si	55520-89-3	3.91801e+07	328.28
22.5337	Pentacosane	63.218	C25H52	629-99-2	367866	352.407
10.6163	Pentadecane	71.3083	C15H32	629-62-9	1.20161e+06	212.25
12.9058	Pentane, 2,2,4,4-tetramethyl-	56.1433	C9H20	1070-87-7	98493.6	128.157
23.5804	Petroselinic acid, TMS derivative	71.8286	C21H42O2Si	96851-53-5	1.10099e+06	354.295
27.2293	Phenol, 2,6-bis(1,1-dimethylethyl)-4-isocyano-	52.4141	C15H21NO	20600-84-4	97565.5	231.162
12.0248	Phosphonic acid, tri-(trimethylsilyl) derivative	64.6697	C9H27O4PSi3	1000386-39-3	1.12697e+06	314.095
10.83	Phosphonic acid, tri-(trimethylsilyl) derivative	57.801	C9H27O4PSi3	1000386-39-3	488579	314.095
6.09505	Phosphonothioamidodifluoridate, N,N-dimethyl-	53.8464	C2H6F2NPS	812-13-5	128444	144.993
17.4744	Phosphoric acid, 2-(trimethylsiloxy)-1-[(trimethylsiloxy)methyl]ethyl bis(trimethylsilyl) ester	53.3135	C15H41O6PSi4	31038-12-7	77120.9	460.172
17.9782	Phosphoric acid, bis(trimethylsilyl) 2,3-bis[(trimethylsilyl)oxy]propyl ester	84.6177	C15H41O6PSi4	31038-11-6	452842	460.172
8.79563	Phosphoric acid, bis(trimethylsilyl)monomethyl ester	80.1751	C7H21O4PSi2	18291-81-1	1.65861e+06	256.072
9.40652	Phosphoric acid, diundecyl ethyl ester	50.9257	C24H51O4P	1000308-89-0	540.06	434.352
5.8113	Phosphorus trifluoride	55.7647	F3P	7783-55-3	65477.8	87.969
18.2586	Phosphorylethanolamine, 4TMS derivative	78.6475	C14H40NO4PSi4	55334-92-4	1.61641e+06	429.177
14.6742	Phthalazine-1,4(2H,3H)-dione, 2-(3,4-dichlorohenyl)-	54.0005	C14H8Cl2N2O2	1000272-75-6	72323.4	305.996
16.0014	Phthalic acid, di(2-(4-chlorophenoxy)ethyl) ester	54.5904	C24H20Cl2O6	1000377-91-6	6141	474.064
10.6397	Phthalic acid, di(pentafluorophenyl) ester	52.7295	C20H4F10O4	1000356-37-4	130931	497.995
8.82631	Pipecolic acid, N-octyloxycarbonyl-, octyl ester	52.7462	C23H43NO4	1000393-12-9	8745.96	397.319
9.60831	Pipecolic acid, N-octyloxycarbonyl-, tridecyl ester	63.558	C28H53NO4	1000393-13-4	100928	467.397
17.6373	Propanedinitrile, 2-[1-[4-(3,5-dimethyl-1-pyrazolyl)phenyl]-2-pyrrolylmethylene]-	54.7398	C19H15N5	258352-93-1	40532.7	313.133
28.6695	propanedinitrile, 2-[2-methyl-6-[2-(2,3,6,7-tetrahydro-1H,5H-benzo[ij]quinolizin-9-yl)ethenyl]-4H-pyran-4-ylidene]-	50.0847	C23H21N3O	1000402-55-1	265556	355.168
22.4932	Pyrazine, 2,5-dimethyl-3-(1-propenyl)-, (Z)-	52.2482	C9H12N2	55138-73-3	13466.2	148.1
10.7782	Pyrazinoic acid, TBDMS derivative	55.1304	C11H18N2O2Si	1000373-07-6	721049	238.114
5.21661	pyrimidine, 2-hydrazinyl-4,6-dimethoxy-	50.7473	C6H10N4O2	1000404-57-8	228412	170.08
14.7404	Pyroglutamic acid, TMS derivative	59.3511	C8H15NO3Si	1000333-17-1	725378	201.082
10.5609	Quinoline, 8-hydroxy-7-nitro-	61.2222	C9H6N2O3	1000298-89-1	26745.3	190.038
14.5406	Rhodanine	60.5278	C3H3NOS2	141-84-4	806969	132.966
32.981	Sarcosine, N-(4-ethylbenzoyl)-, isobutyl ester	51.1602	C16H23NO3	1000321-22-9	37513.6	277.168
21.3172	Scyllo-Inositol, 6TMS derivative	77.0521	C24H60O6Si6	14251-18-4	255699	612.301
11.9711	Serine, 3TMS derivative	84.0105	C12H31NO3Si3	64625-17-8	1.17247e+06	321.161
8.5353	Silane, cyclohexyldimethoxymethyl-	89.1924	C9H20O2Si	17865-32-6	2.24621e+06	188.123
34.858	Silane, diethylbutoxy(dodec-9-ynyloxy)-	50.0644	C20H40O2Si	1000363-57-9	109791	340.28
27.7264	Silane, diethyldecyloxyoctadecyloxy-	69.3123	C32H68O2Si	1000363-33-3	107760	512.499
13.9215	Silane, diethylheptadecyloxy(2-phenylethoxy)-	59.4865	C29H54O2Si	1000363-17-2	174635	462.389
35.3978	Silane, diethylheptyloxyoctadecyloxy-	61.972	C29H62O2Si	1000363-96-0	65235.3	470.452
33.5371	Silane, diethylheptyloxytridecyloxy-	50.7609	C24H52O2Si	1000363-95-6	128536	400.374
27.3583	Silane, diethylhexadecyloxy(2-methoxyethoxy)-	55.1041	C23H50O3Si	1000363-54-5	77286.9	402.353
10.7122	Silane, dimethyl(2-ethylbutoxy)decyloxy-	55.8914	C18H40O2Si	1000347-58-0	175623	316.28
18.8062	Silane, dimethyl(2-methylphenoxy)docosyloxy-	54.0488	C31H58O2Si	1000346-96-7	22271.7	490.421
11.7577	Silane, dimethyldi(2,5-dimethylphenoxy)-	50.8666	C18H24O2Si	1000347-30-4	23320.8	300.155
16.5596	Silanetriamine, 1-azido-N,N,N',N',N'',N''-hexamethyl-	53.9399	C6H18N6Si	5599-36-0	5.62739e+06	202.136
12.1642	Silanol, trimethyl-, phosphate (3:1)	59.2901	C9H27O4PSi3	10497-05-9	490913	314.095
10.4546	Silanol, trimethyl-, phosphate (3:1)	85.2273	C9H27O4PSi3	10497-05-9	2.40038e+07	314.095
10.6575	Silanol, trimethyl-, phosphate (3:1)	72.6112	C9H27O4PSi3	10497-05-9	4.95058e+06	314.095
23.1455	Silylamine, 1,1,1-trimethyl-N-[4'-(trimethylsiloxy)-4-biphenylyl]-	52.0818	C18H27NOSi2	31396-30-2	109939	329.163
32.4461	Spiro[naphthalene-1(2H),2'-oxiran]-2-one, 3'-acetyl-3'-methyl-, cis-(+)-	61.7428	C14H12O3	129833-03-0	6.11026e+06	228.079
23.8765	Stearic acid, TMS derivative	87.1518	C21H44O2Si	18748-91-9	1.15183e+07	356.311
12.2205	Sulfanilamide, N,N-bis(trimethylsilyl)-	50.9477	C12H24N2O2SSi2	1000395-67-9	1269.29	316.11
7.33321	Sulfurous acid, dimethyl ester	69.4036	C2H6O3S	616-42-2	20811.6	110.004
21.7159	Terephthalic acid, di(2-phenoxyethyl) ester	56.9434	C24H22O6	1000416-04-9	309319	406.142
27.3296	Terephthalic acid, piperidide, decyl ester	54.8518	C23H35NO3	1000323-89-5	10455	373.262
27.476	tert-Butyldimethylsilyl 4-methyl-2-((2,2,3,3,3-pentafluoropropanoyl)oxy)benzoate	52.5012	C17H21F5O4Si	1000385-88-9	48051.6	412.113
5.54832	tert-Butyldimethylsilyl nitrite	51.2862	C6H15NO2Si	1000366-61-8	13367.2	161.087
27.4904	Tetracosamethyl-cyclododecasiloxane	72.7375	C24H72O12Si12	18919-94-3	384224	888.226
23.4117	Tetracosamethyl-cyclododecasiloxane	77.4041	C24H72O12Si12	18919-94-3	286115	888.226
30.8575	Tetracosamethyl-cyclododecasiloxane	70.2377	C24H72O12Si12	18919-94-3	294875	888.226
34.7157	Tetracosamethyl-cyclododecasiloxane	53.3779	C24H72O12Si12	18919-94-3	303761	888.226
26.2039	Tetracosamethyl-cyclododecasiloxane	65.0481	C24H72O12Si12	18919-94-3	473075	888.226
31.9271	Tetracosamethyl-cyclododecasiloxane	60.5886	C24H72O12Si12	18919-94-3	568464	888.226
12.743	Tetradecane	69.7881	C14H30	629-59-4	334280	198.235
11.41	Tetradecane, 5-methyl-	62.8168	C15H32	25117-32-2	246241	212.25
6.57136	Tetrasiloxane, decamethyl-	63.8879	C10H30O3Si4	141-62-8	169717	310.127
23.0314	Thiazol-4(5H)-one, 2-phenylamino-5-(4-chlorobenzylideno)-	53.603	C16H11ClN2OS	93989-47-0	9556.93	314.028
11.2576	Thieno[2,3-b]pyridine-2-carboxamide, 3-amino-6-methyl-N-phenyl-	59.4356	C15H13N3OS	1000350-91-6	72924.2	283.078
16.7122	threo-2,5-Dimethyl-2-(2-methyl-2-tetrahydrofuryl)tetrahydrofuran	53.0413	C11H20O2	1000112-56-1	92051.2	184.146
10.5403	trans-2-Hydroxycinnamic acid, O-trifluoroacetyl-, methyl ester	52.8513	C12H9F3O4	1000365-31-0	131714	274.045
11.136	trans-4,4'-Bis(methylthio)chalcone	50.0798	C17H16OS2	33868-48-3	109557	300.064
21.6458	Trihydroxyphenethylamine, 3,4,5-	54.5242	C8H11NO3	1927-04-04	169333	169.074
14.3747	Tromethamine, 4TMS derivative	63.8931	C16H43NO3Si4	136281-54-4	129474	409.232
9.53305	Undecane, 2,6-dimethyl-	75.4269	C13H28	17301-23-4	822009	184.219
9.31485	Undecane, 4,7-dimethyl-	80.309	C13H28	17301-32-5	1.12621e+06	184.219
5.29566	Undecane, 5-methyl-	59.9833	C12H26	1632-70-8	412252	170.203
6.78525	Undecane, 5-methyl-	80.7733	C12H26	1632-70-8	1.16876e+06	170.203
11.6094	Uracil, 2TMS derivative	72.236	C10H20N2O2Si2	10457-14-4	199559	256.106
10.0651	Urea, 2TMS derivative	87.1253	C7H20N2OSi2	18297-63-7	6.18176e+06	204.111
25.9694	Uridine, 3TMS derivative	54.8144	C18H36N2O6Si3	10457-16-6	17748.8	460.188
5.34658	Valeraldehyde, (o-nitrophenyl)hydrazone	51.804	C11H15N3O2	5977-70-8	304366	221.116
